# Supplementary material for: Trienamine catalysed unprecedented remote olefin E/Z isomerisation/[4 + 2]-cycloaddition reaction to access spirooxindole hexahydroindoles
Source: Royal Society of Chemistry journal article supplement (doi:10.1039/d2ob02228a), 2023-01-01

## Supporting Information-II

### NMR Spectral Data

#### **Trienamine catalysed unprecedented remote olefin E/Z isomerisation/[4+2]-cycloaddition reaction to access spirooxindole hexahydroindoles**

**Madavi S. Prasad,<sup>\*a</sup> Murugesan Sivaprakash,<sup>a</sup> Sankar Bharani<sup>a</sup> and L. Raju Chowhan<sup>b</sup>**

*<sup>b</sup>Asymmetric Synthesis and Catalysis Laboratory, Department of Chemistry, Central University of Tamil Nadu, Thiruvarur, 610 005, India*

[shivaprasad@cutn.ac.in](mailto:shivaprasad@cutn.ac.in) and [shivacutn@gmail.com](mailto:shivacutn@gmail.com)

*<sup>b</sup>School of Applied Material Sciences, Centre for Applied Chemistry, Central University of Gujarat, Sector-30, Gandhinagar-382030, Gujarat, India.*

9.762  
7.543  
7.264  
7.231  
7.226  
7.218  
7.215  
7.205  
7.191  
7.171  
7.114  
7.109  
7.101  
7.090  
7.067  
7.046  
7.017  
6.996  
6.787  
6.767  
4.601  
4.597  
4.592  
4.304  
4.277  
4.119  
4.113  
4.108  
3.906  
3.888  
3.870  
3.782  
3.758  
3.736  
3.712  
3.391  
3.385  
3.362  
3.142  
3.116  
3.062  
2.607  
2.601  
2.561  
2.555  
2.451  
2.321  
1.115  
1.097  
1.079  
-0.000

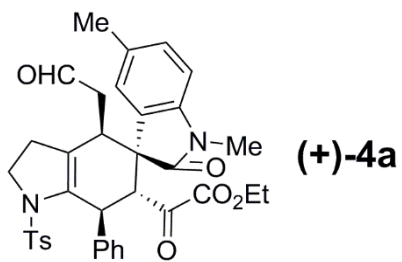

**Product-4a**

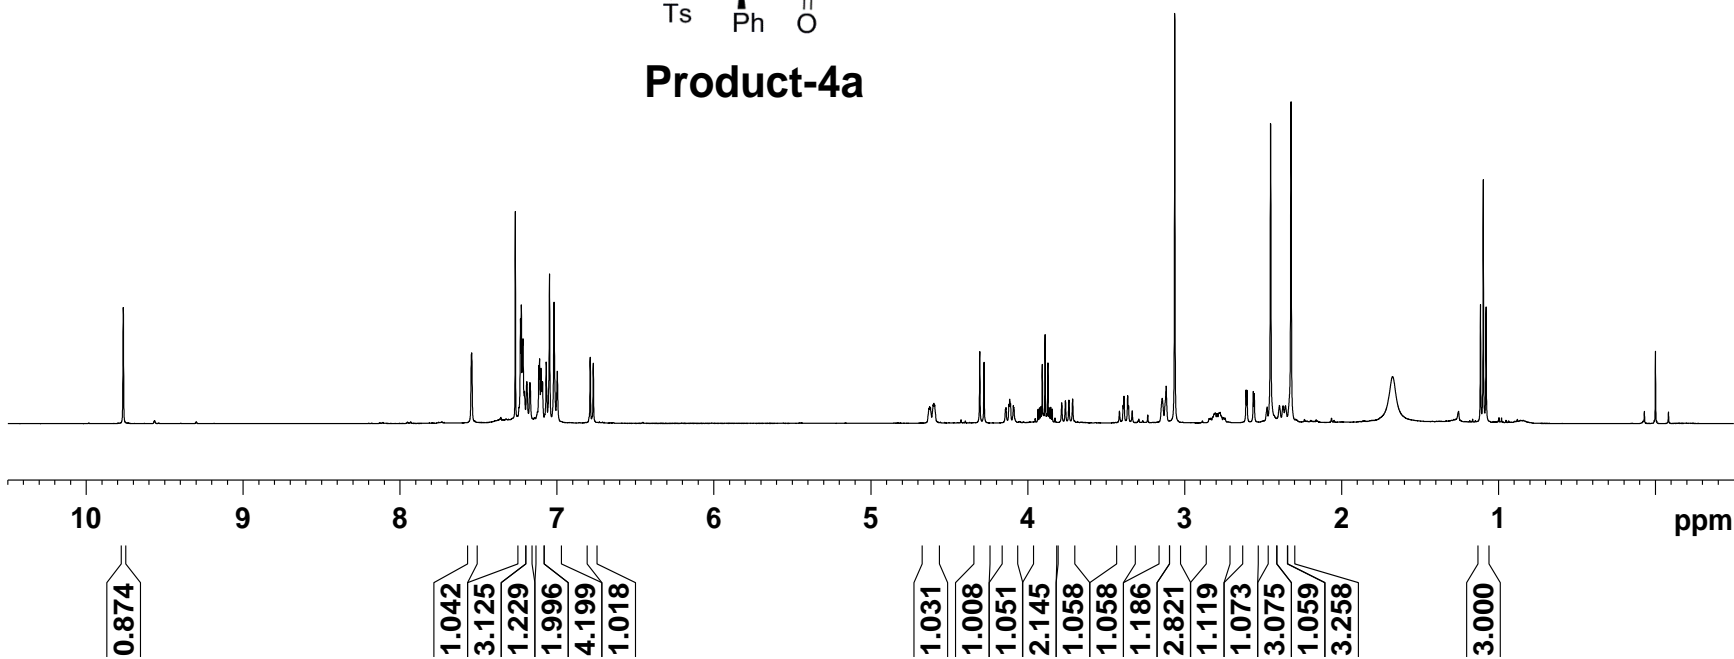

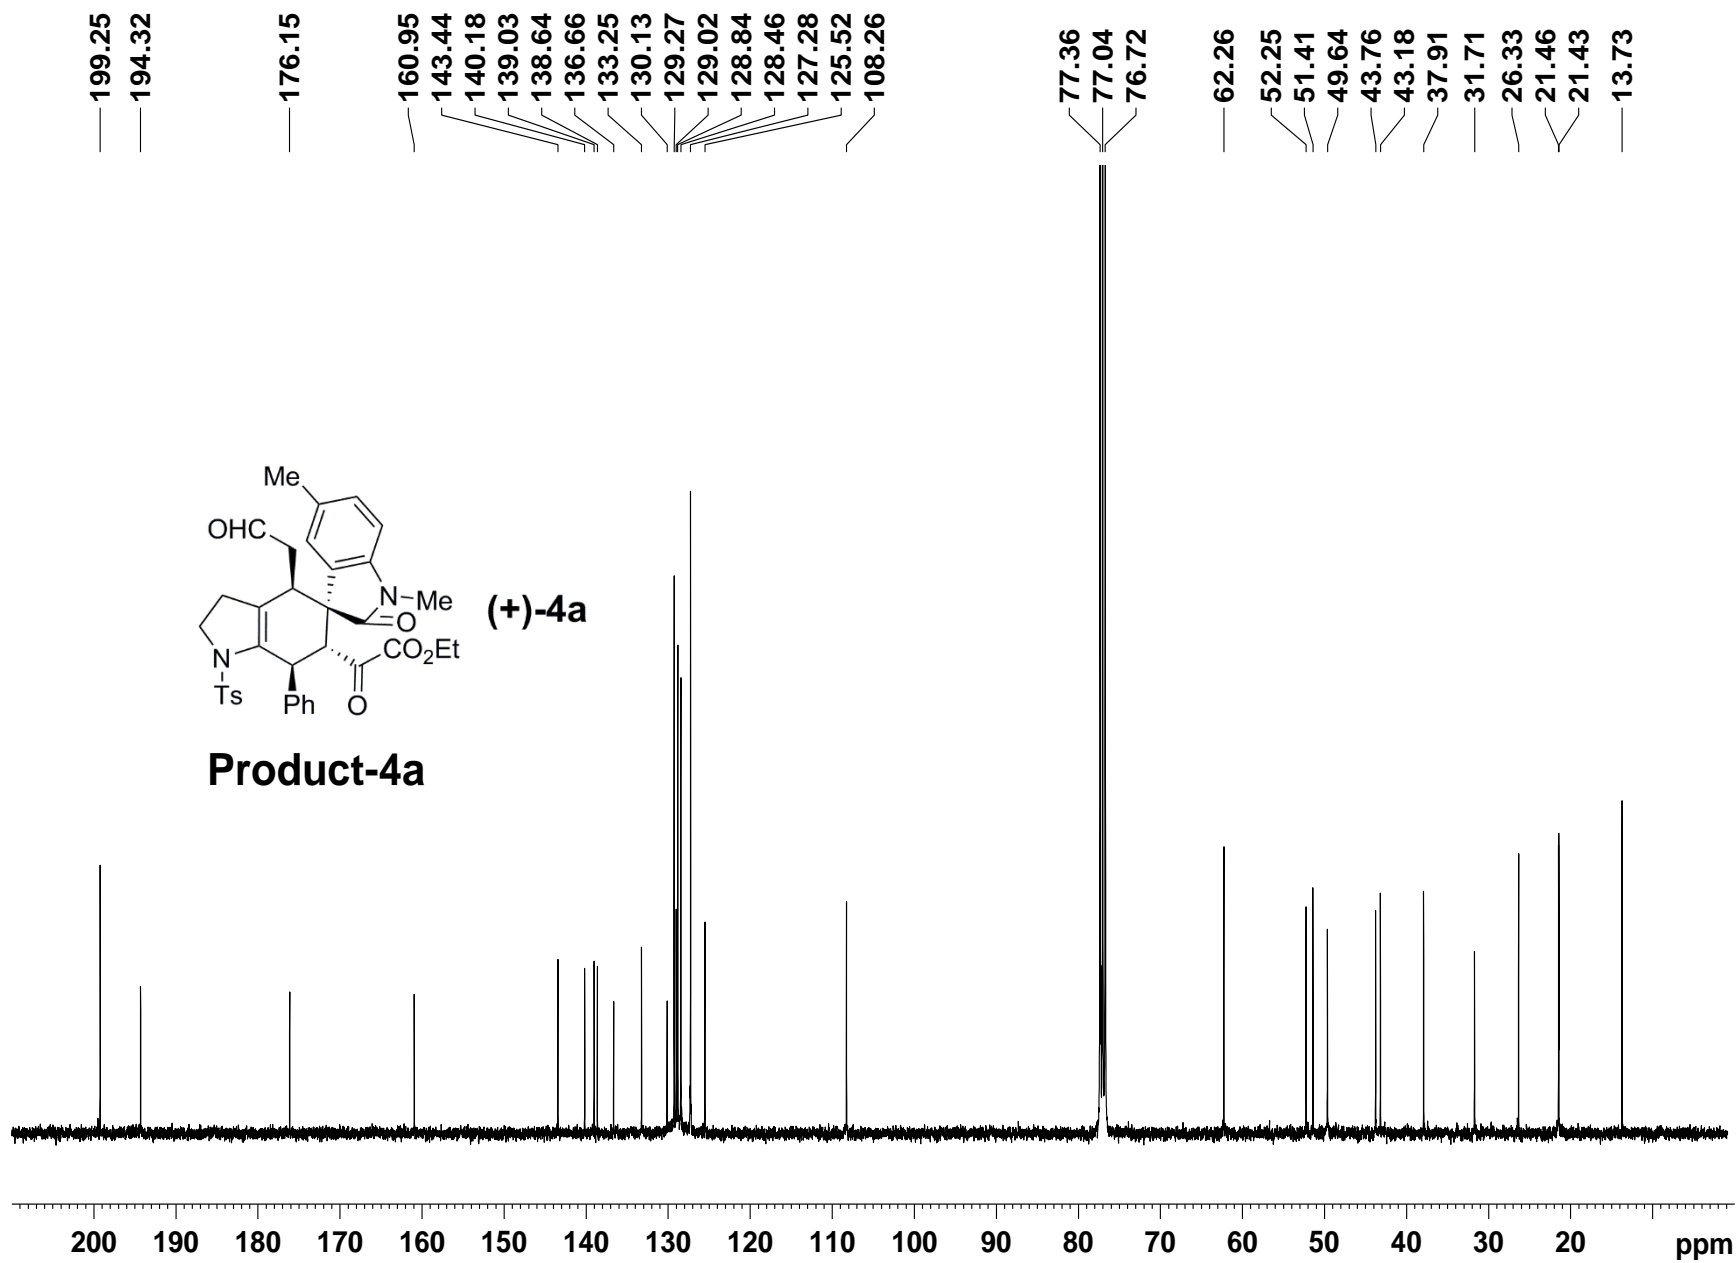

9.746  
7.480  
7.463  
7.462  
7.388  
7.385  
7.368  
7.366  
7.349  
7.346  
7.265  
7.241  
7.233  
7.225  
7.174  
7.170  
7.158  
7.153  
7.144  
7.141  
7.124  
7.122  
7.113  
7.106  
7.102  
7.097  
7.091  
7.071  
6.887  
6.868  
4.542  
4.301  
4.274  
4.172  
4.167  
3.924  
3.915  
3.911  
3.897  
3.893  
3.880  
3.875  
3.765  
3.741  
3.719  
3.695  
3.521  
3.516  
3.493  
3.105  
3.080  
3.069  
2.594  
2.588  
2.548  
2.542  
2.361  
1.115  
1.098  
1.080  
-0.000

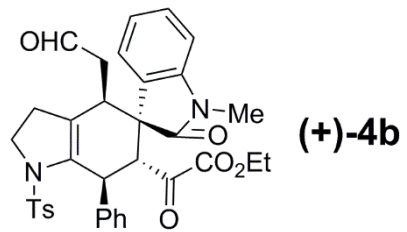

**Product-4b**

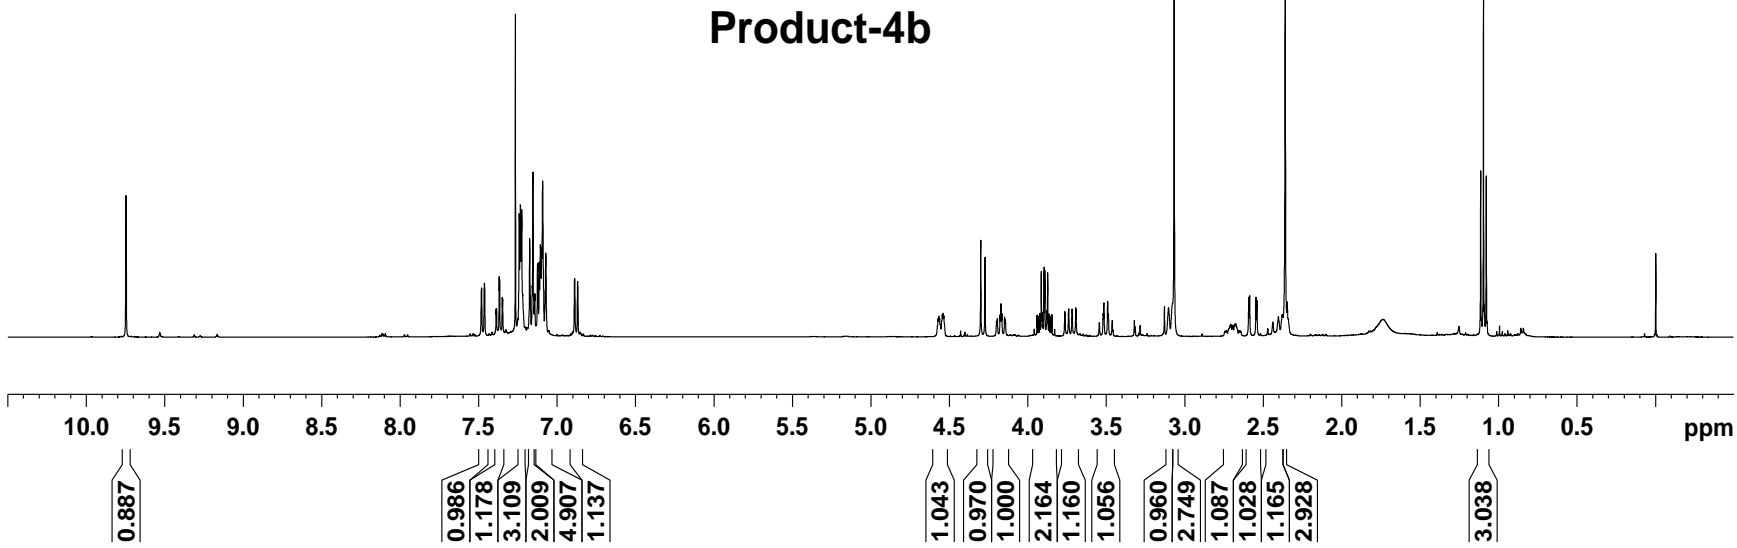

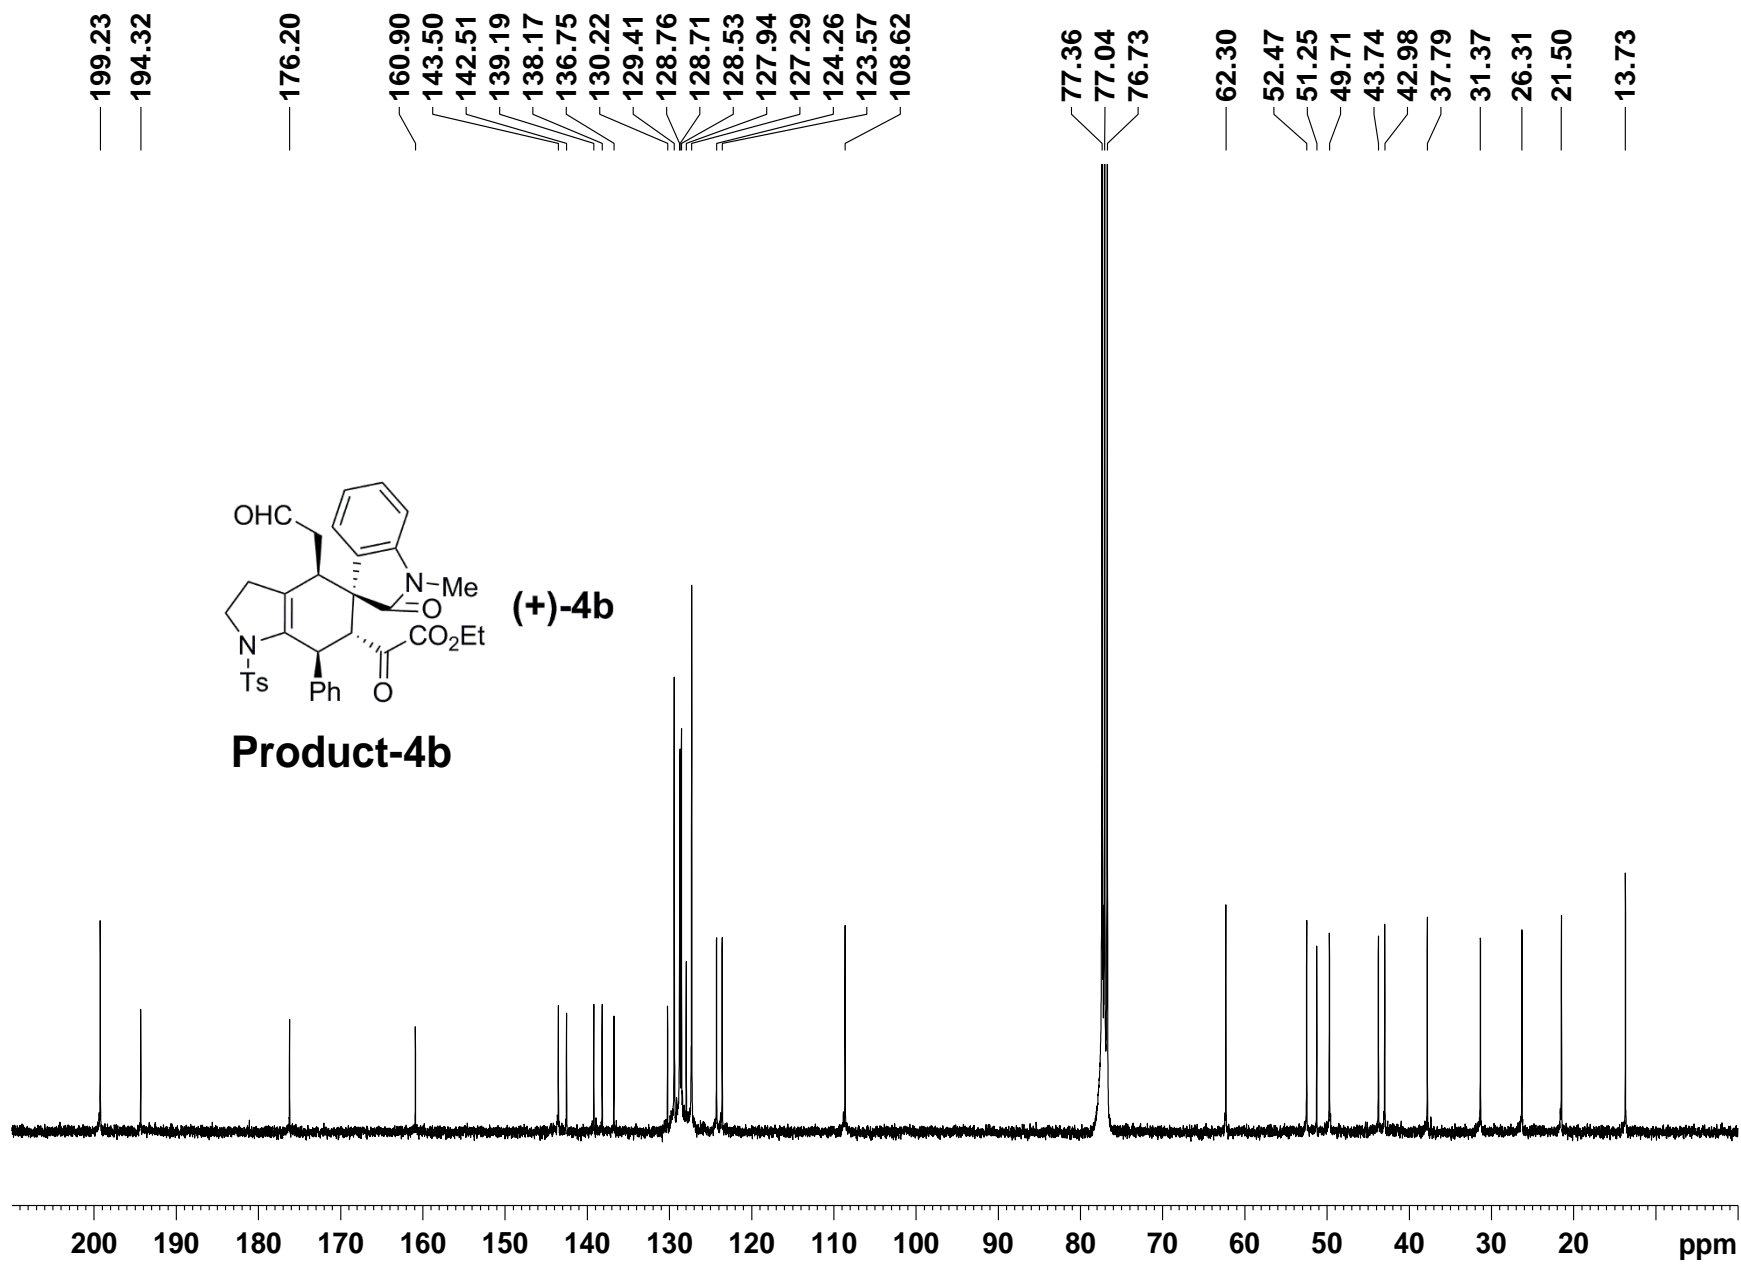

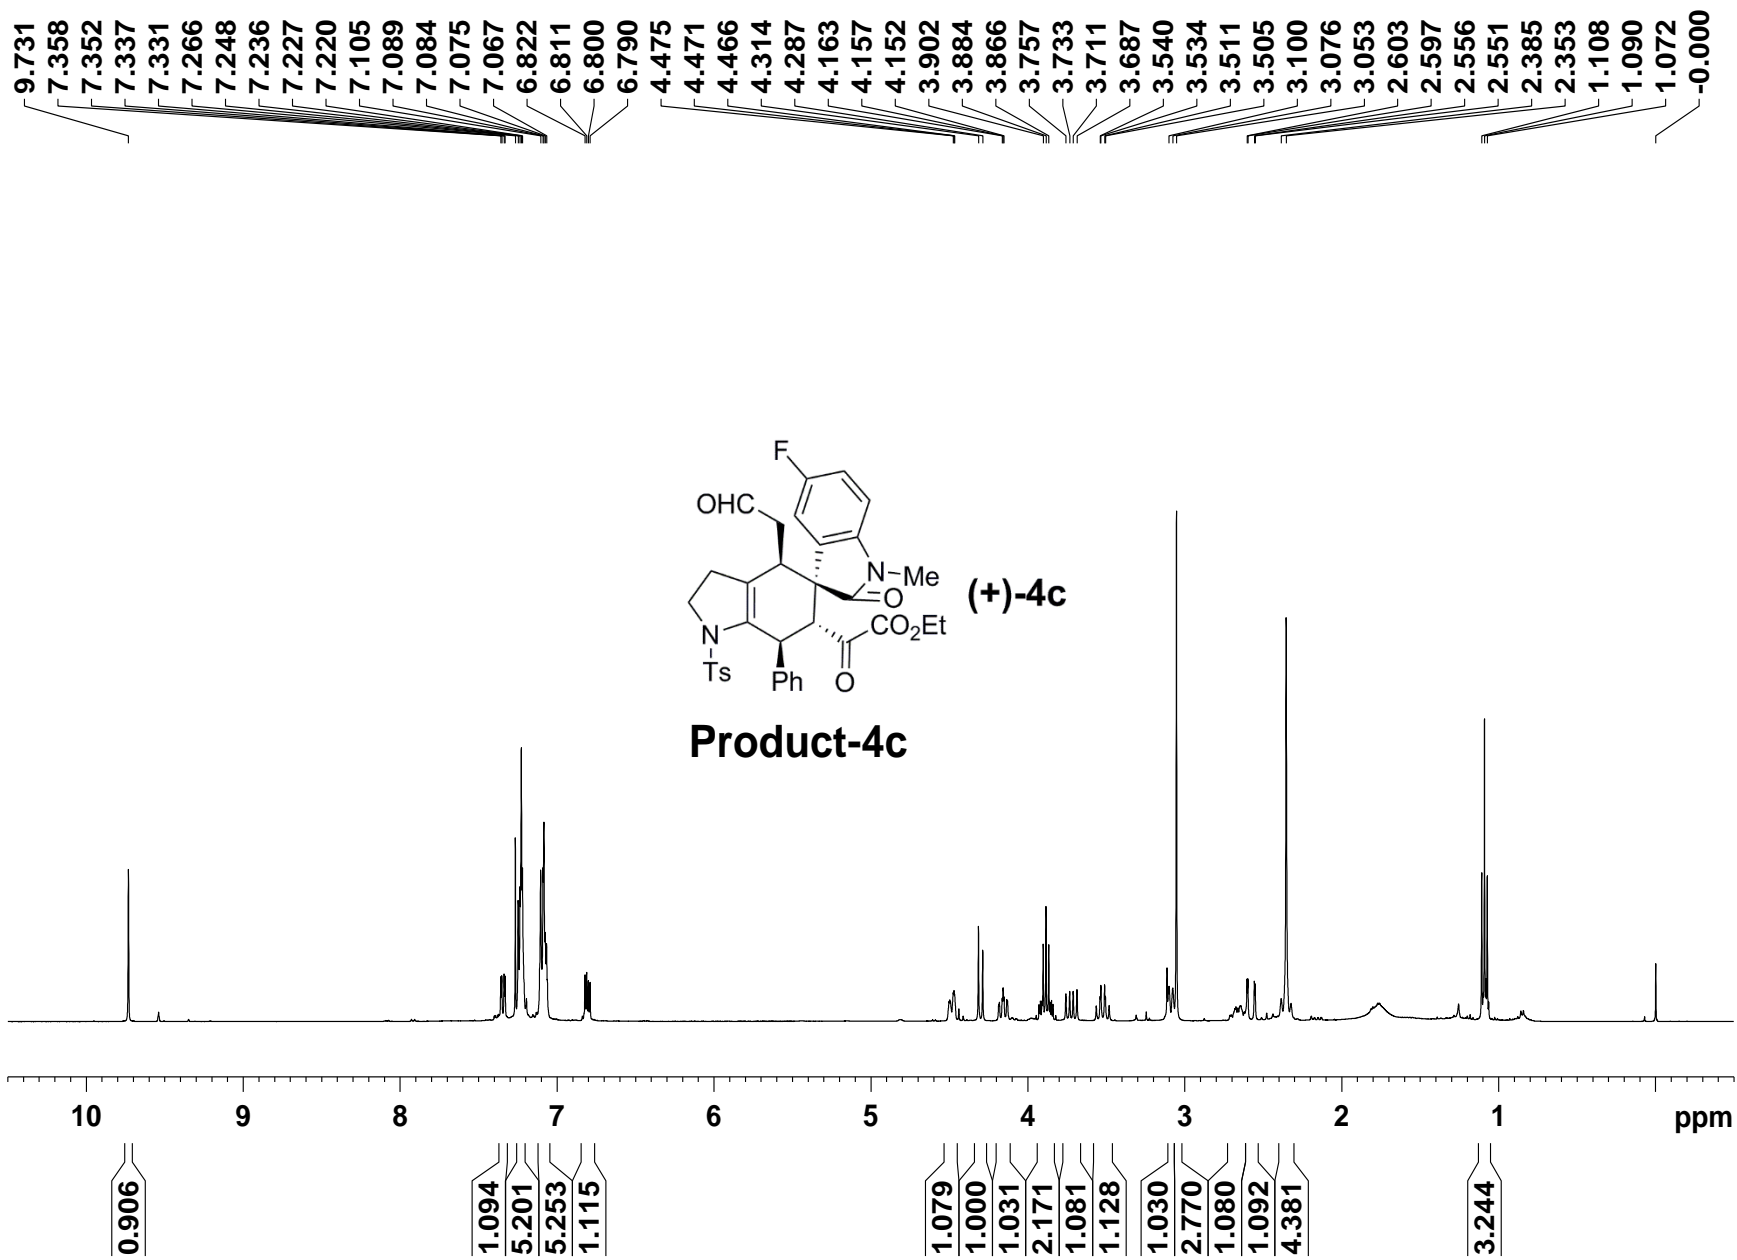

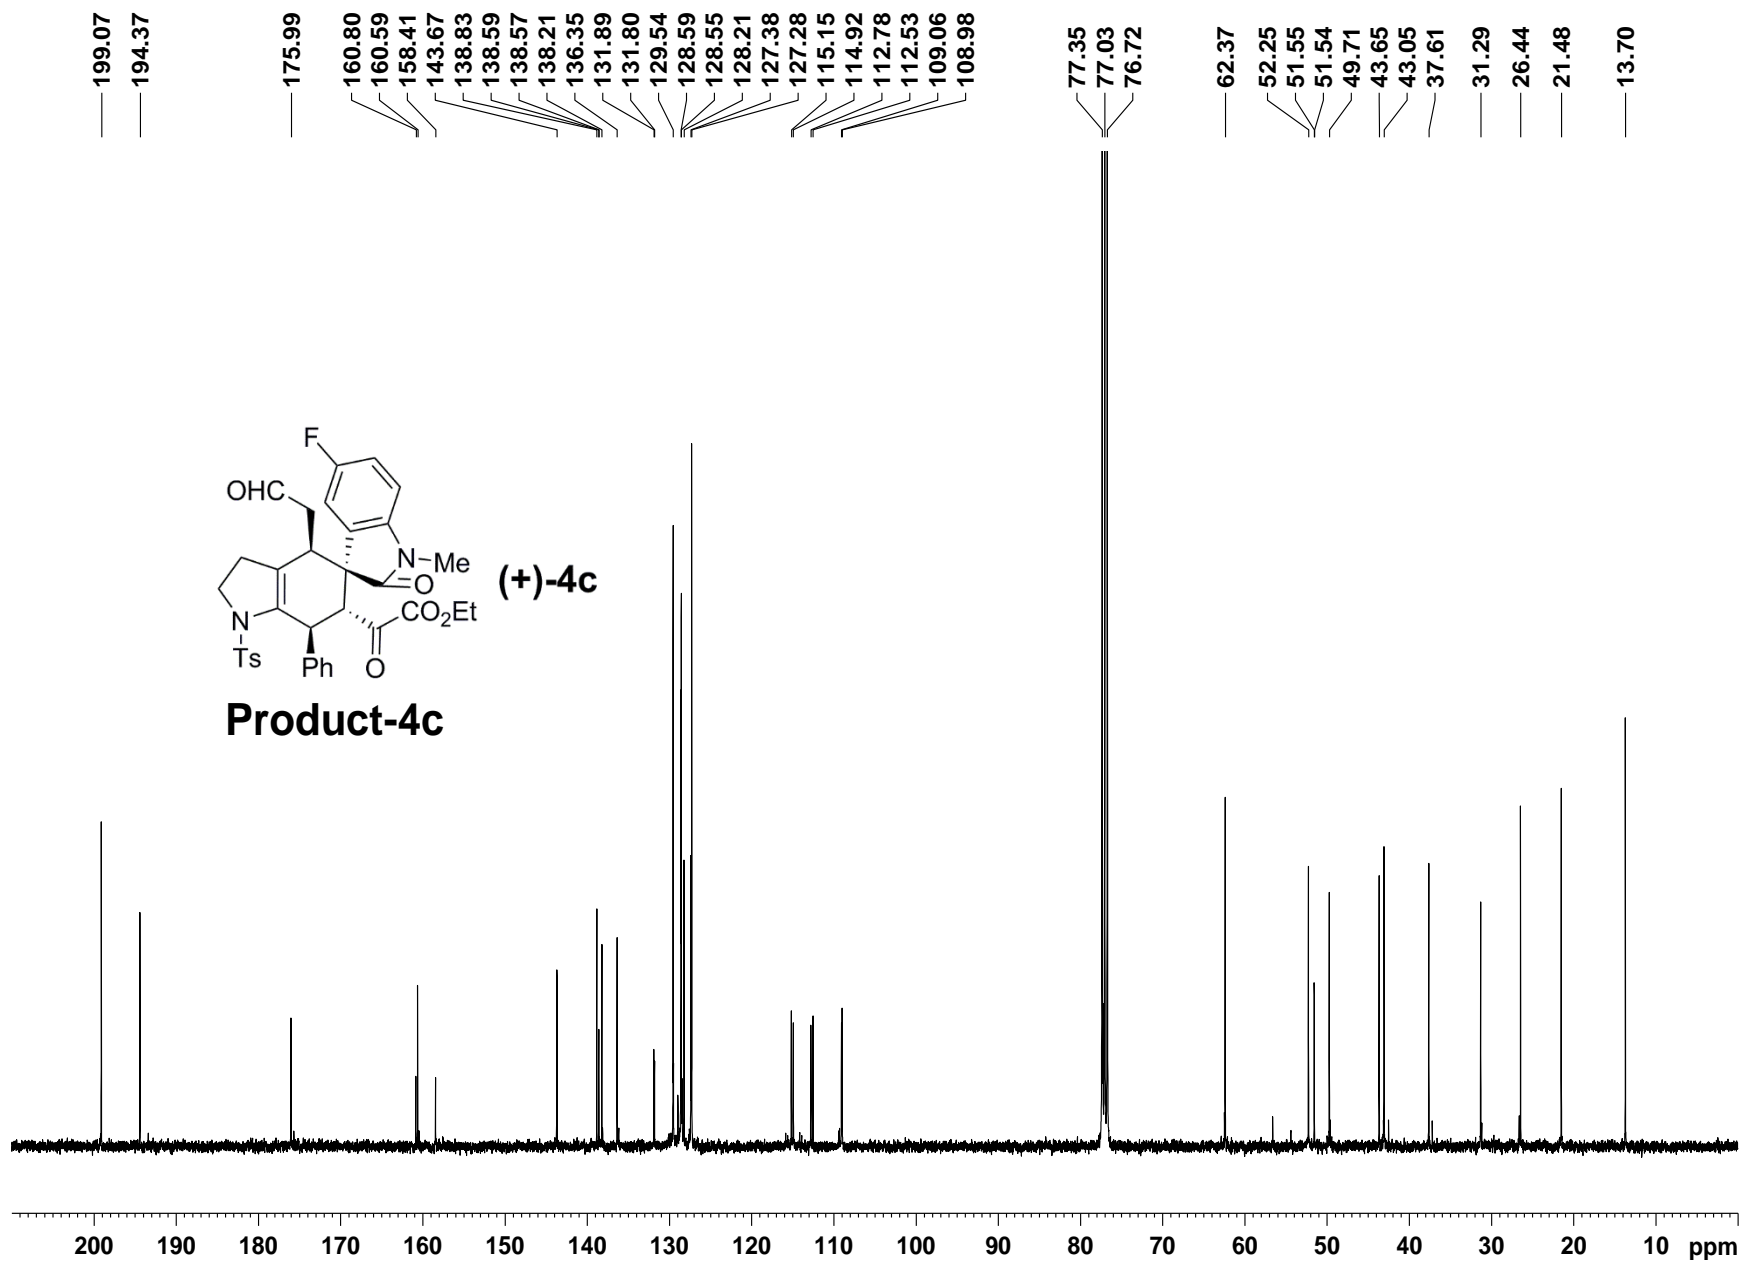

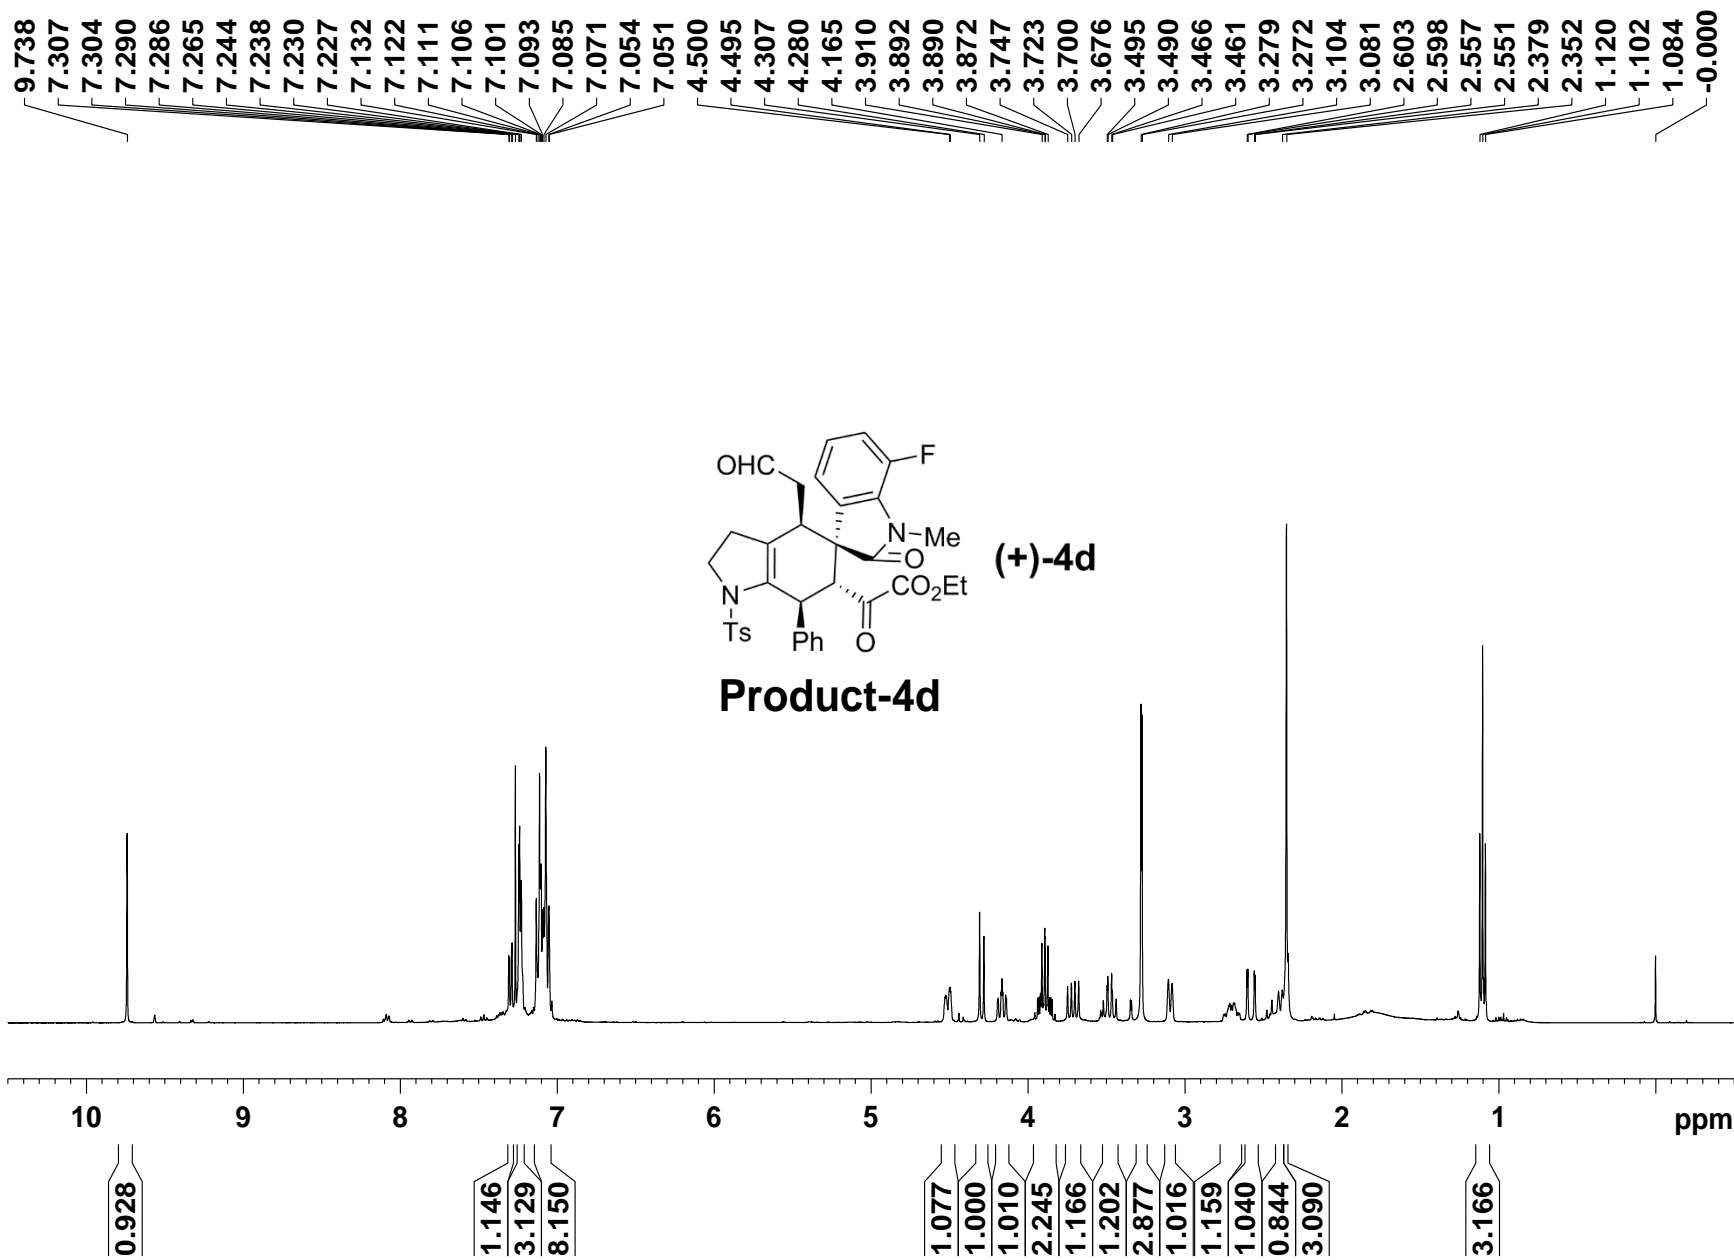



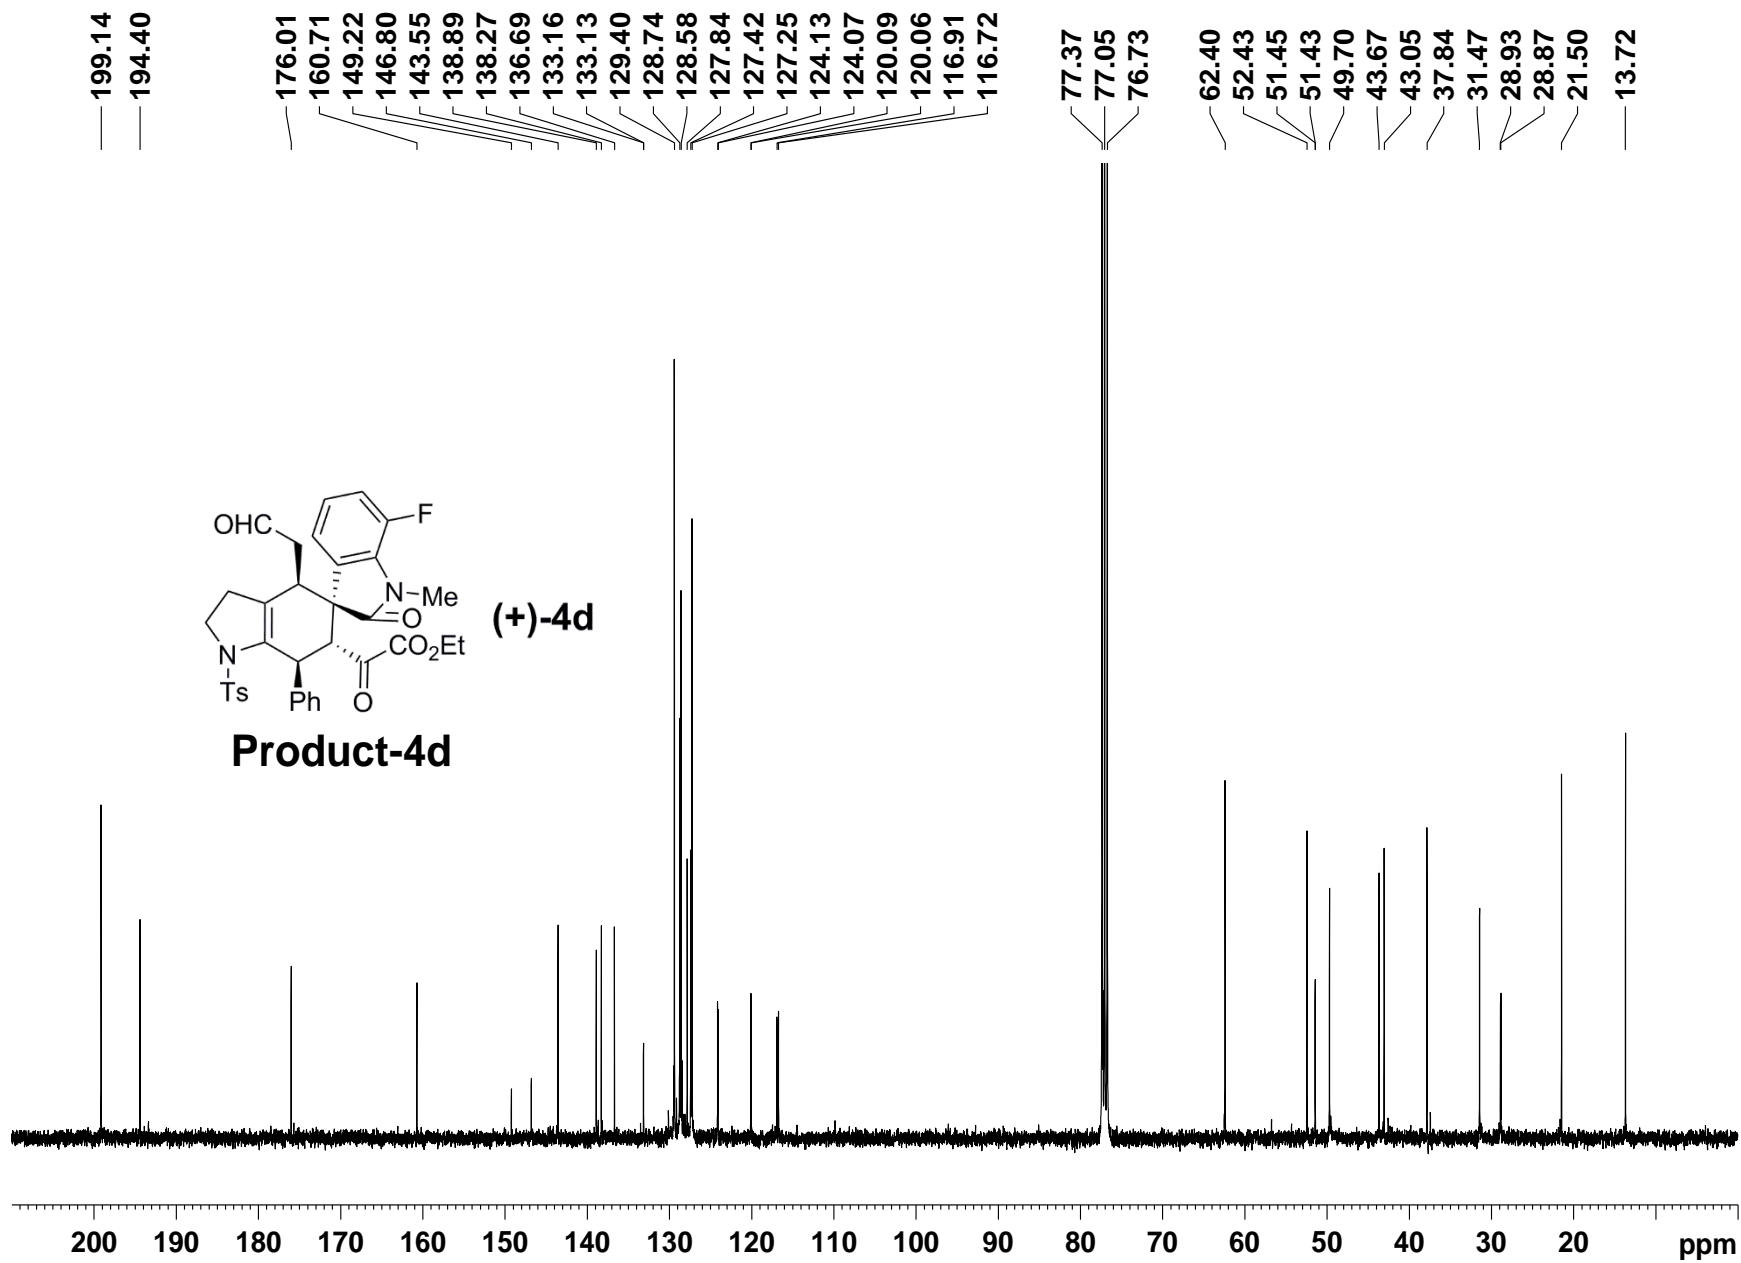

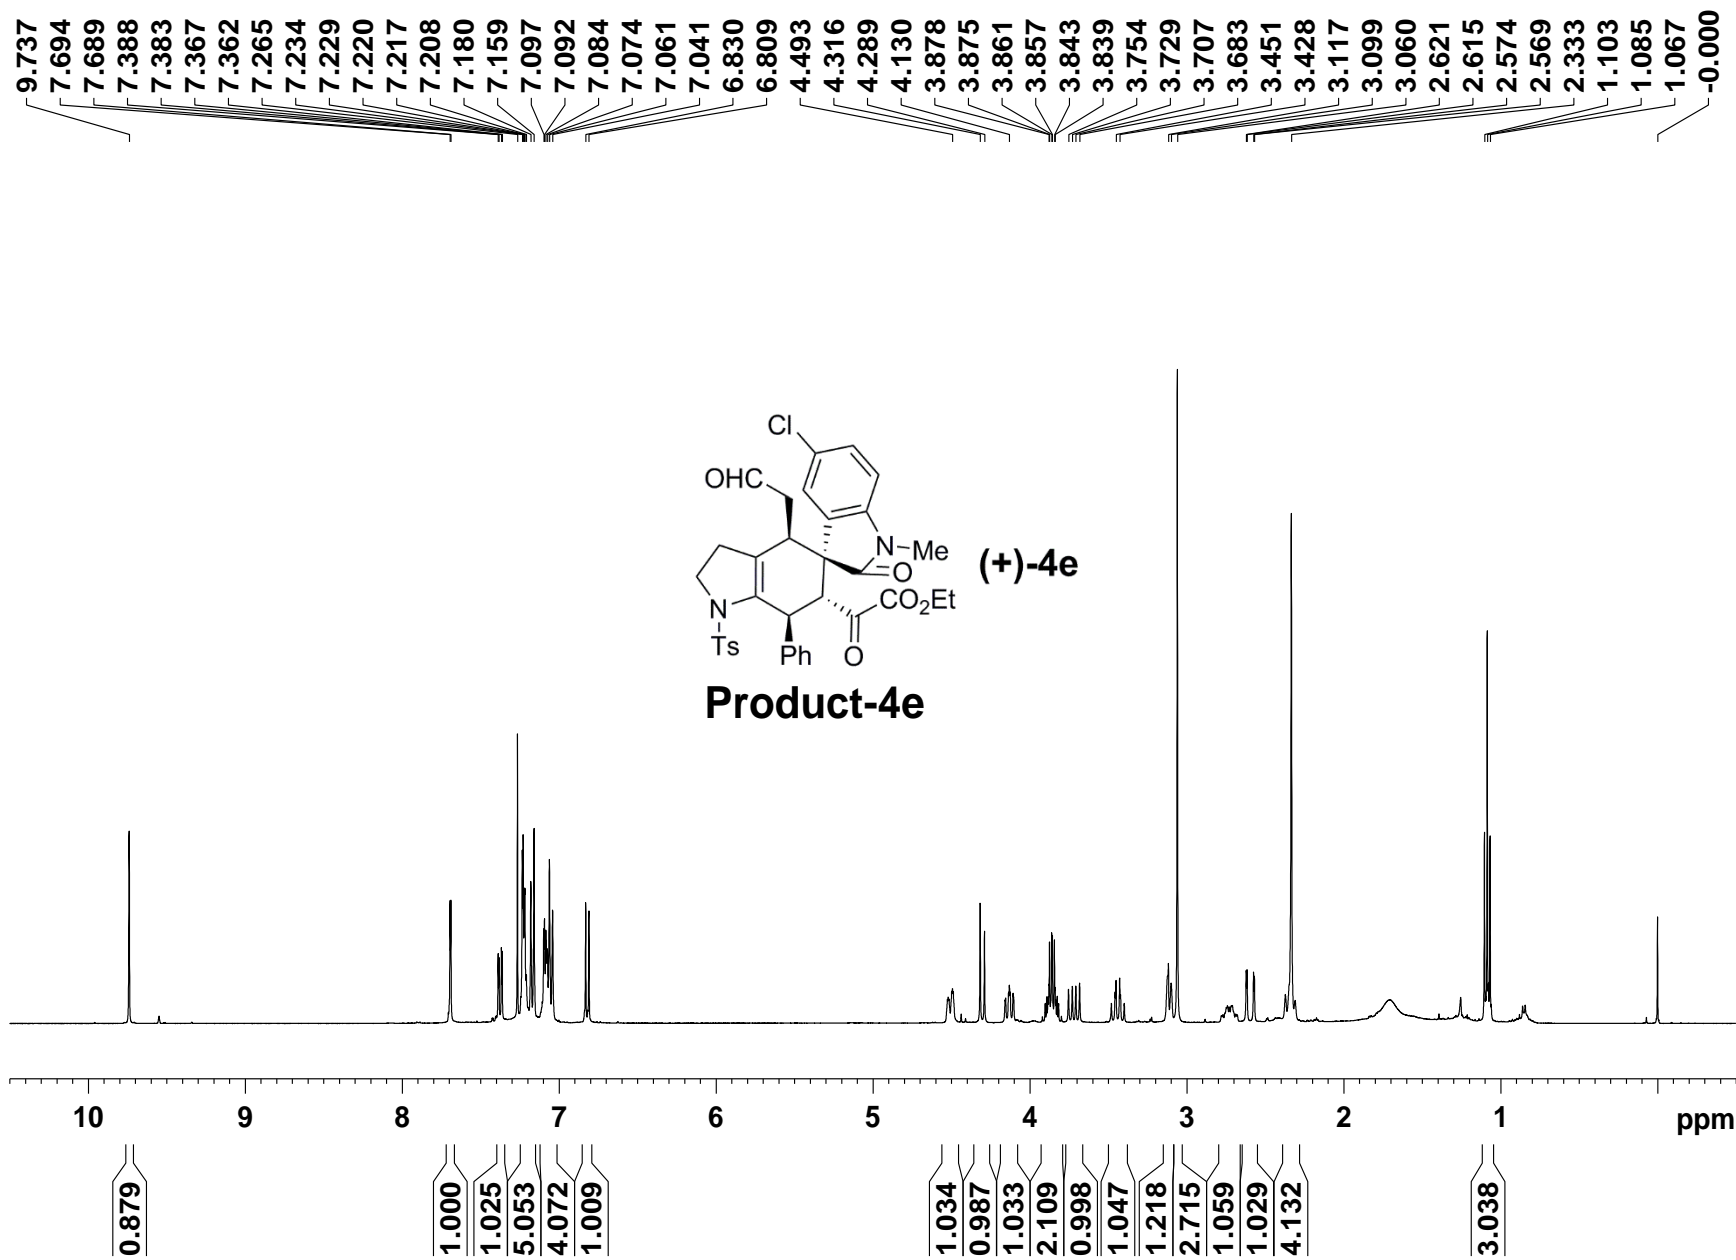

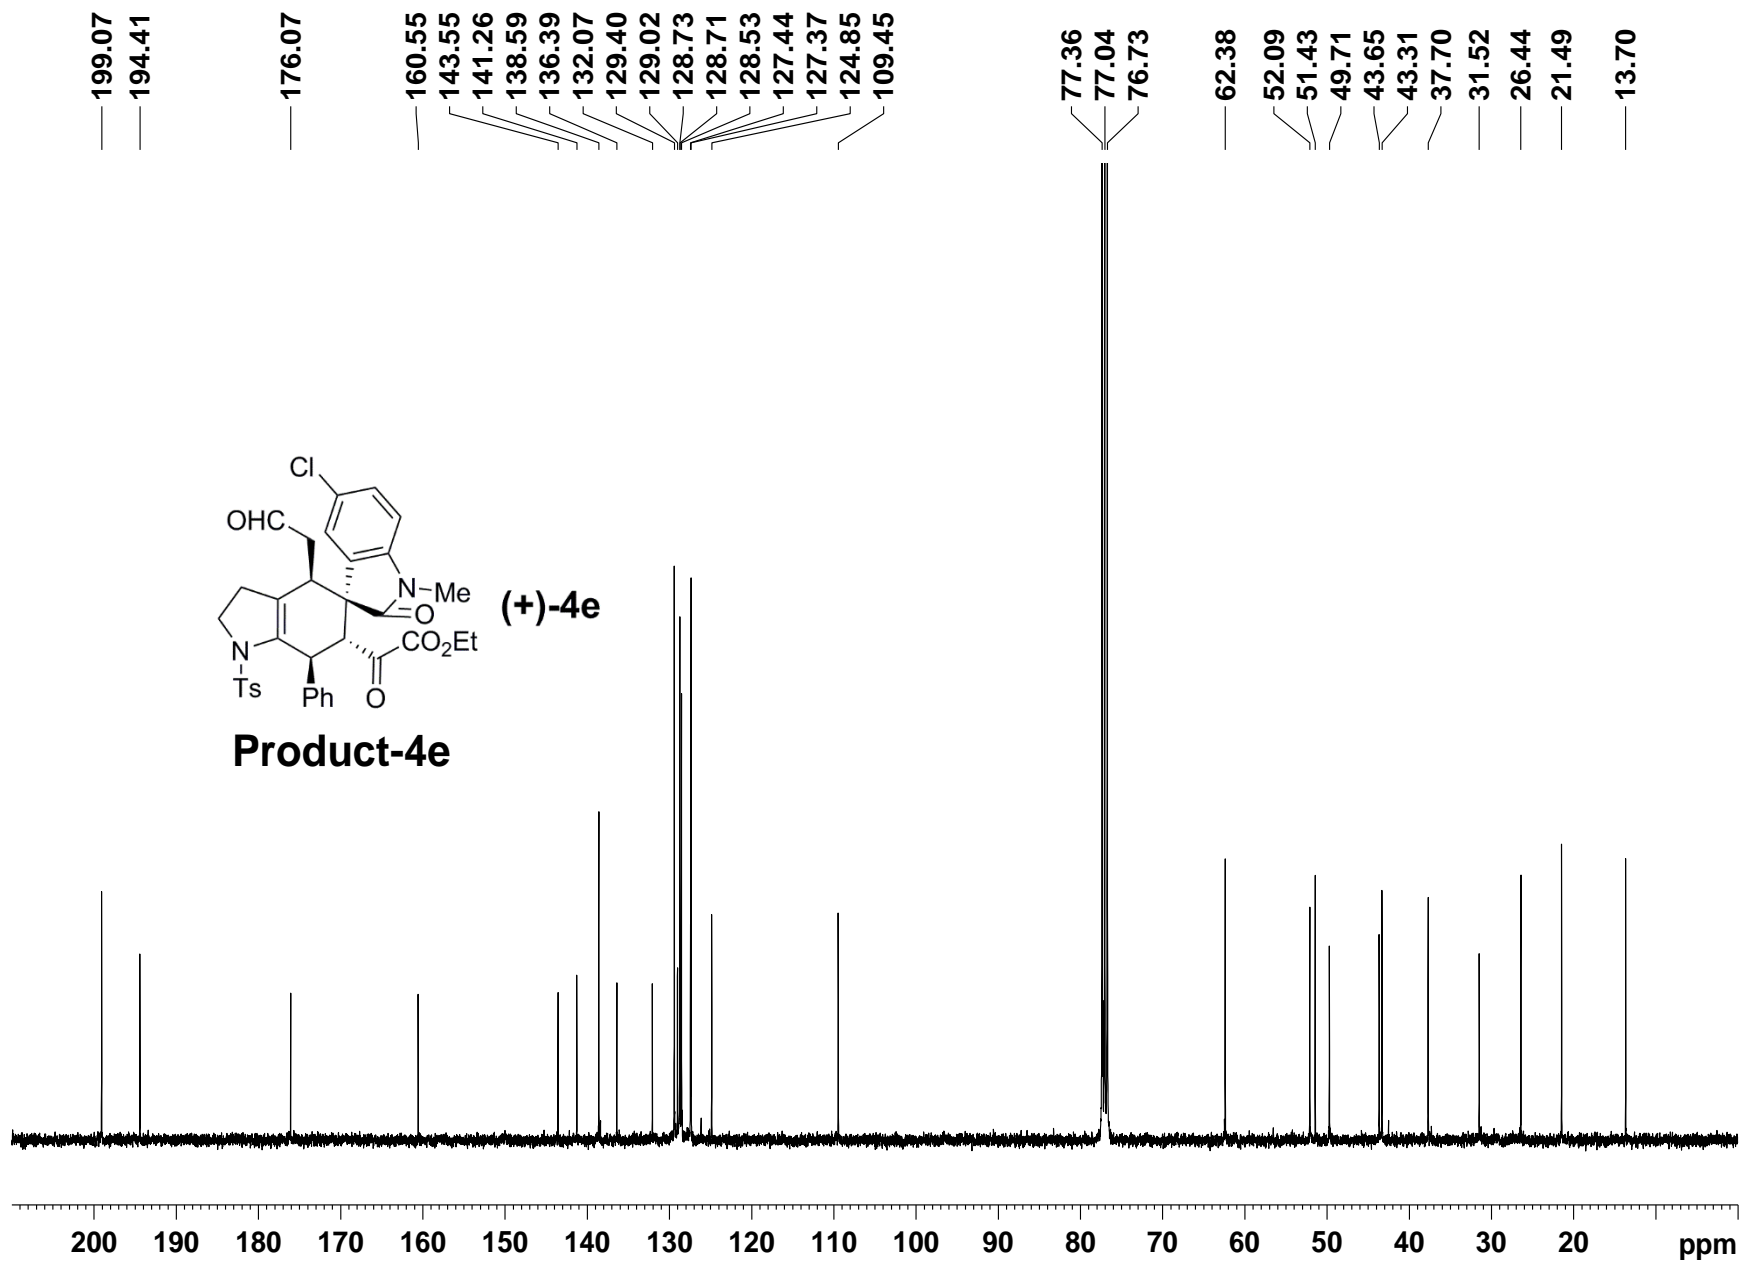

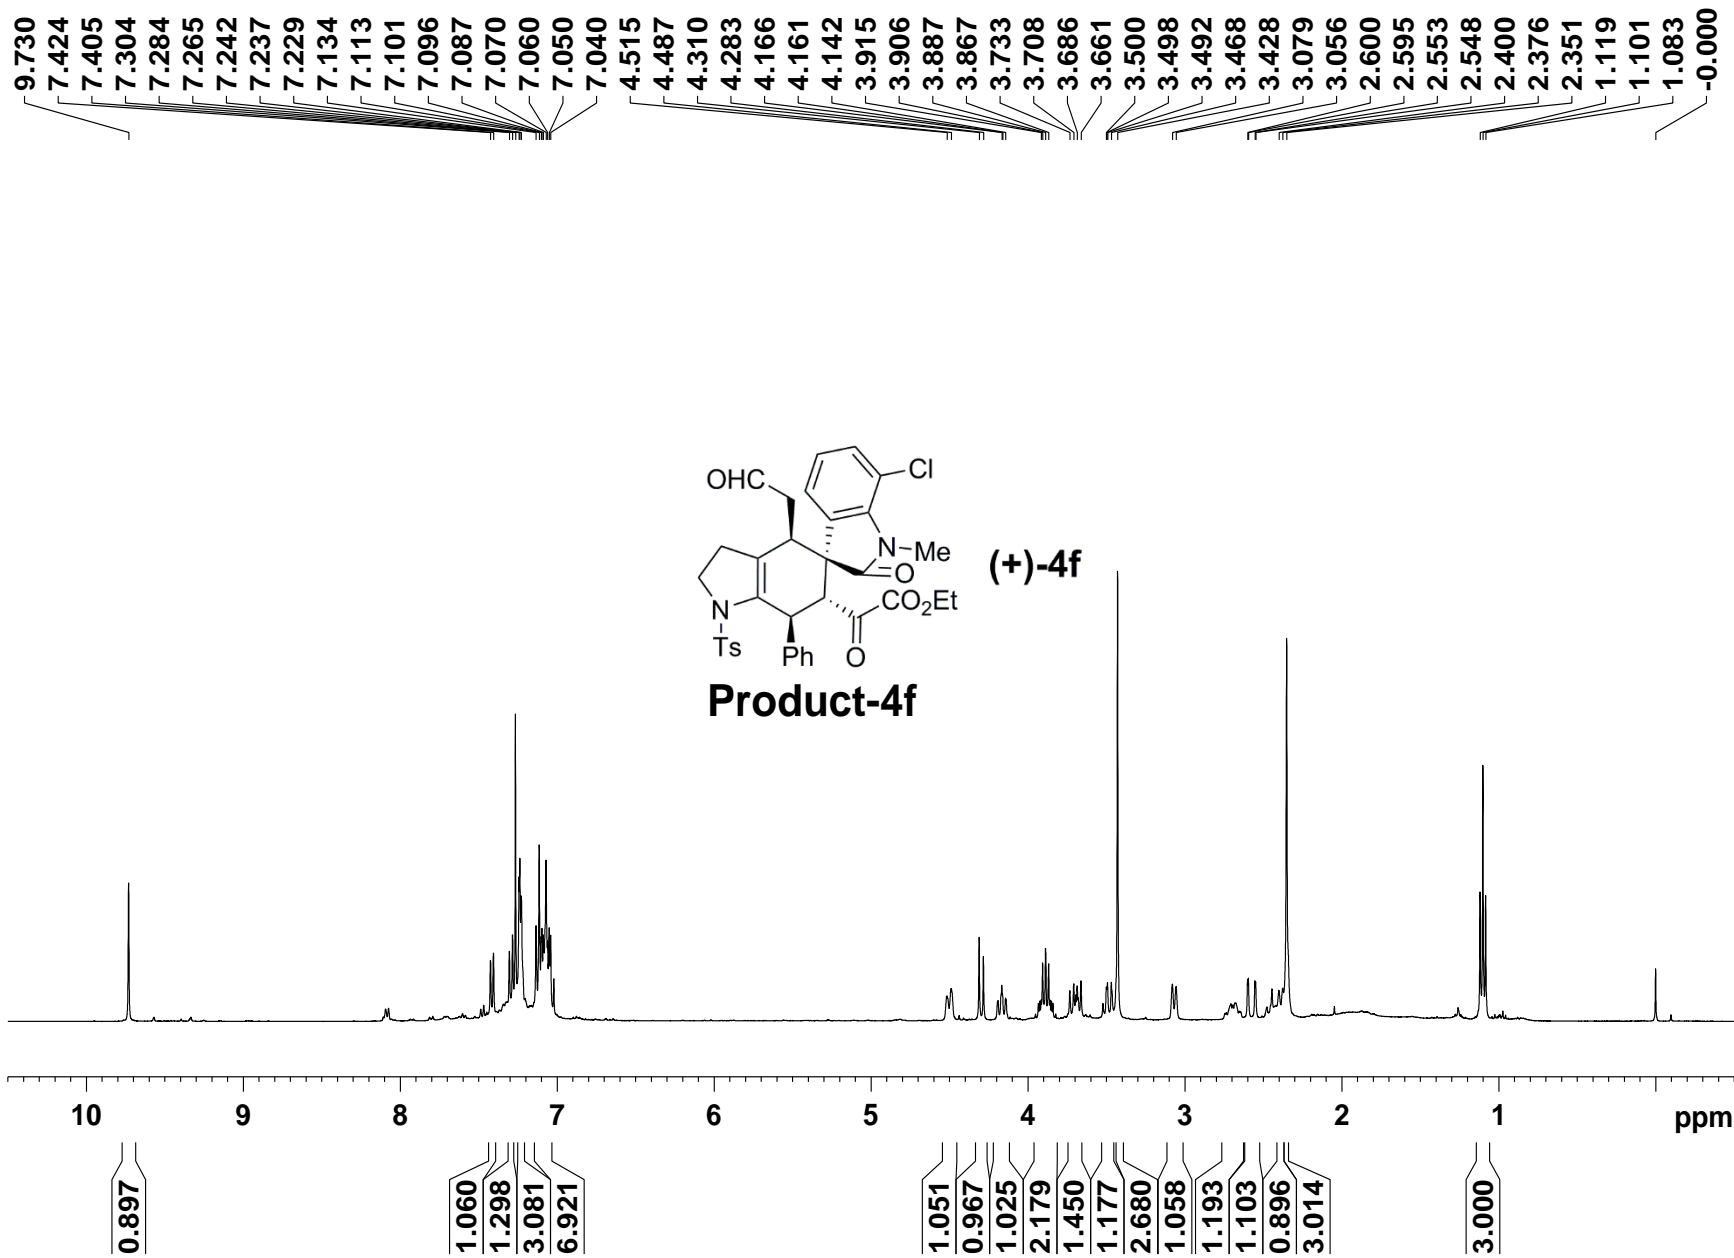

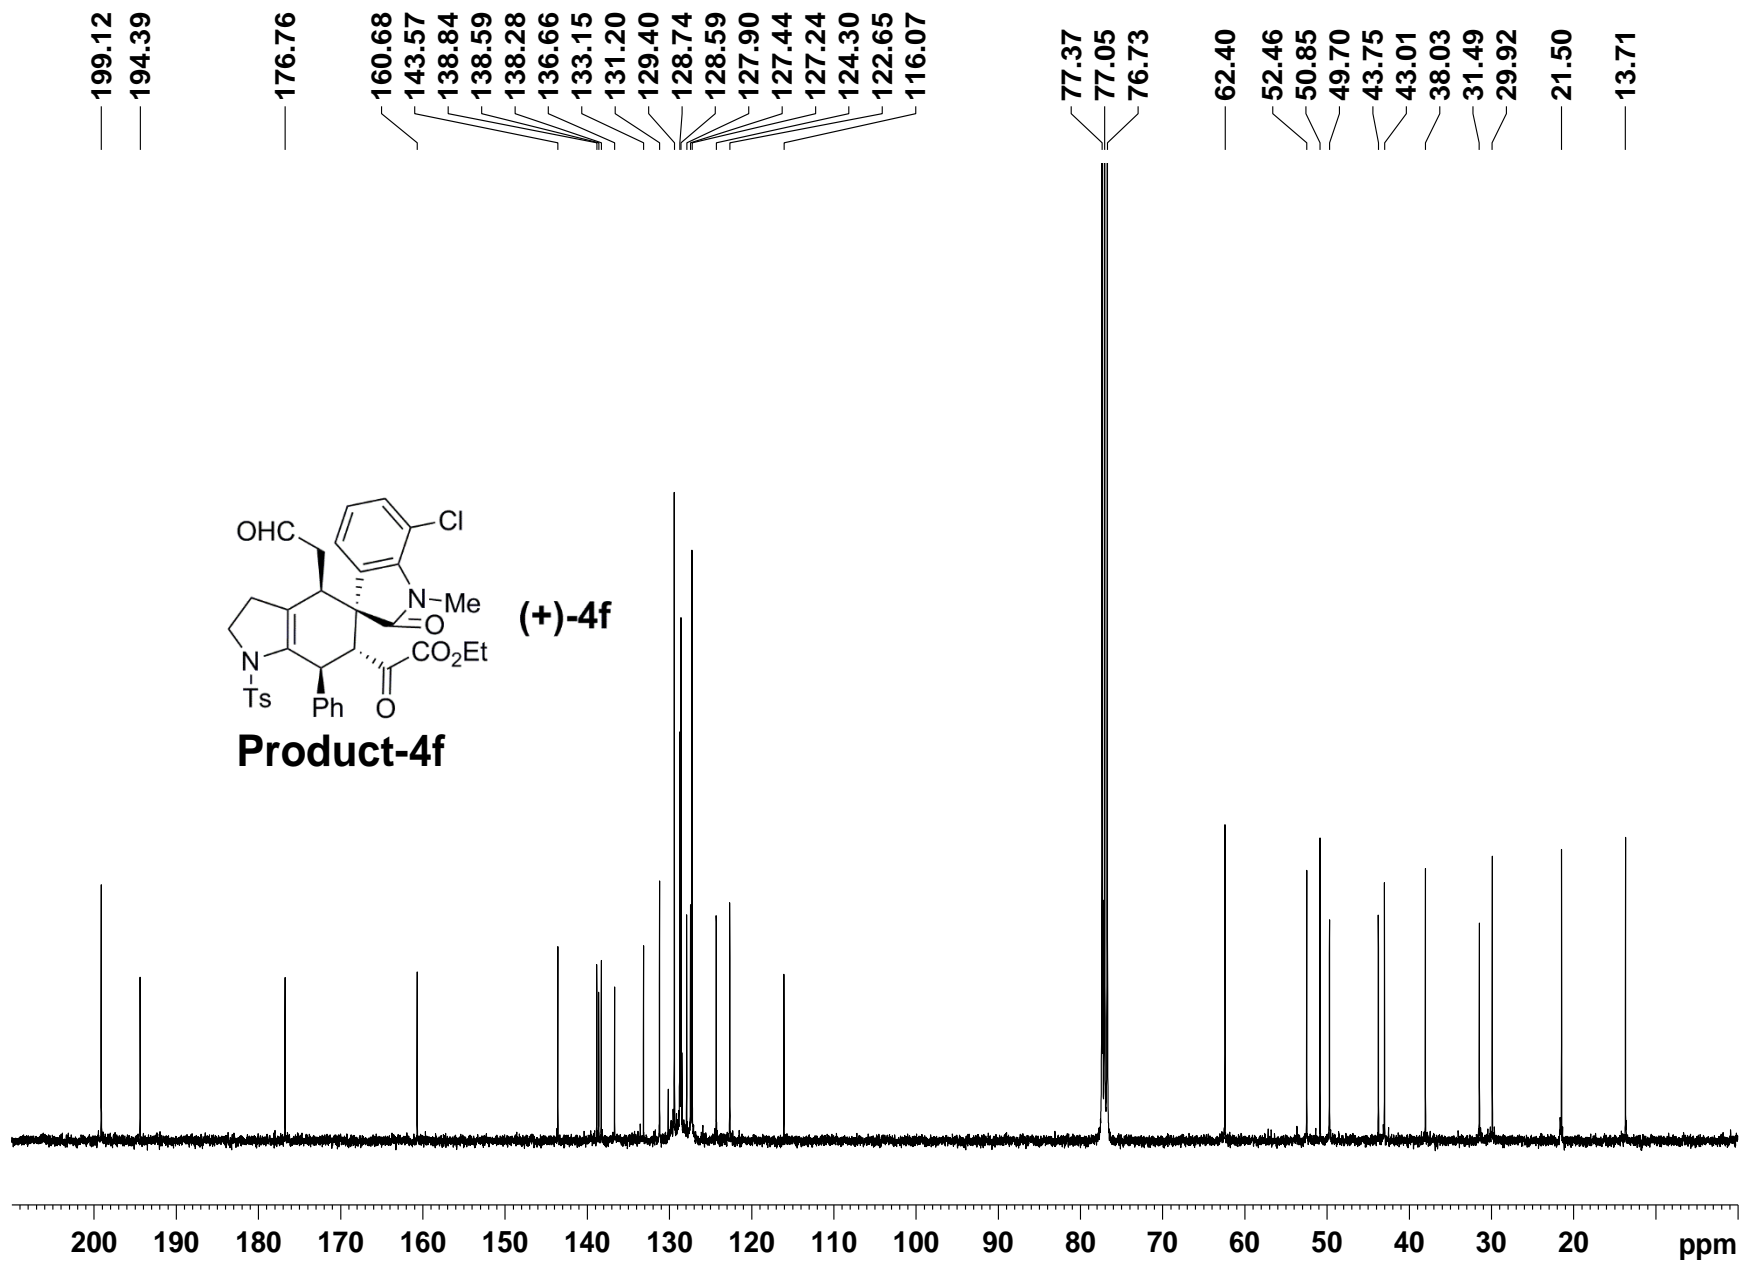

9.736  
7.849  
7.845  
7.541  
7.536  
7.520  
7.515  
7.266  
7.234  
7.229  
7.221  
7.217  
7.207  
7.153  
7.132  
7.100  
7.095  
7.086  
7.076  
7.049  
7.028  
6.788  
6.767  
4.312  
4.285  
4.127  
3.872  
3.867  
3.855  
3.849  
3.837  
3.831  
3.725  
3.703  
3.678  
3.425  
3.402  
3.128  
3.112  
3.105  
3.057  
2.626  
2.620  
2.579  
2.573  
2.348  
2.328  
1.102  
1.084  
1.066  
-0.000

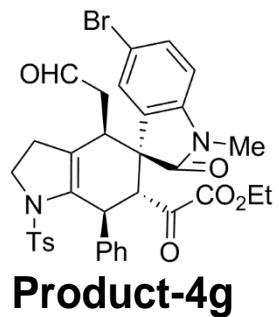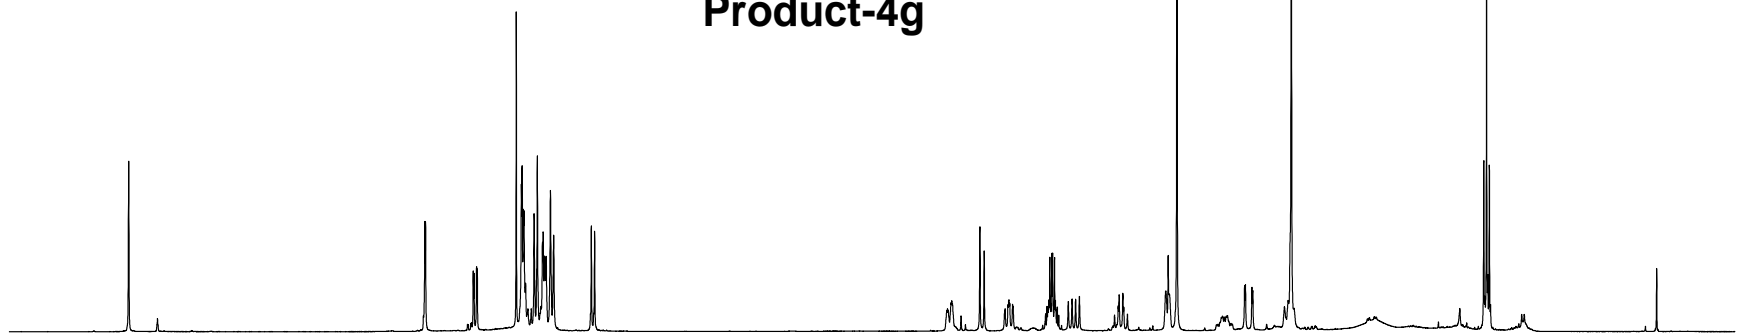

10 9 8 7 6 5 4 3 2 1 ppm

0.903

1.059  
0.963  
3.458  
2.169  
2.357  
2.112  
1.124

1.095  
1.000  
1.028  
2.292  
1.047  
1.047  
1.432  
2.833  
1.082  
1.074  
4.471

3.293

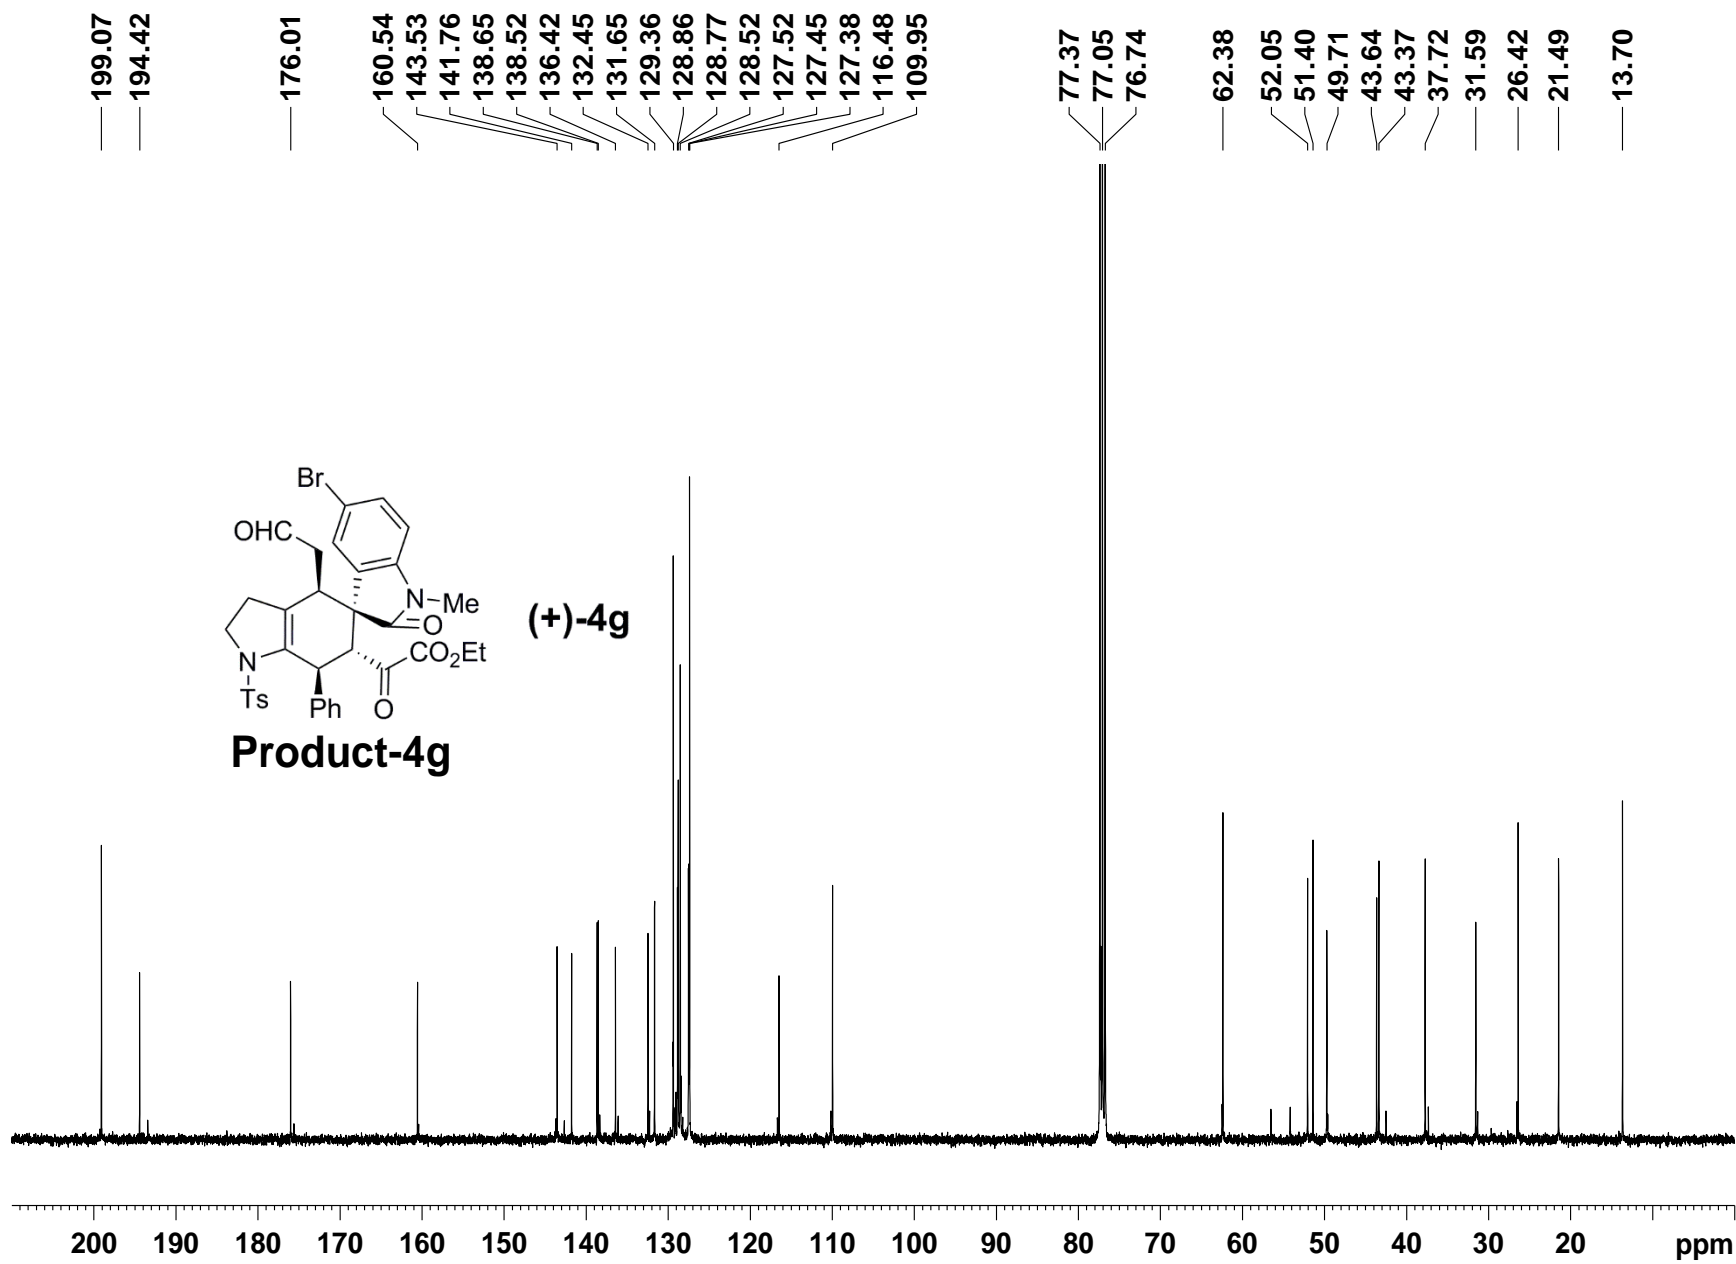

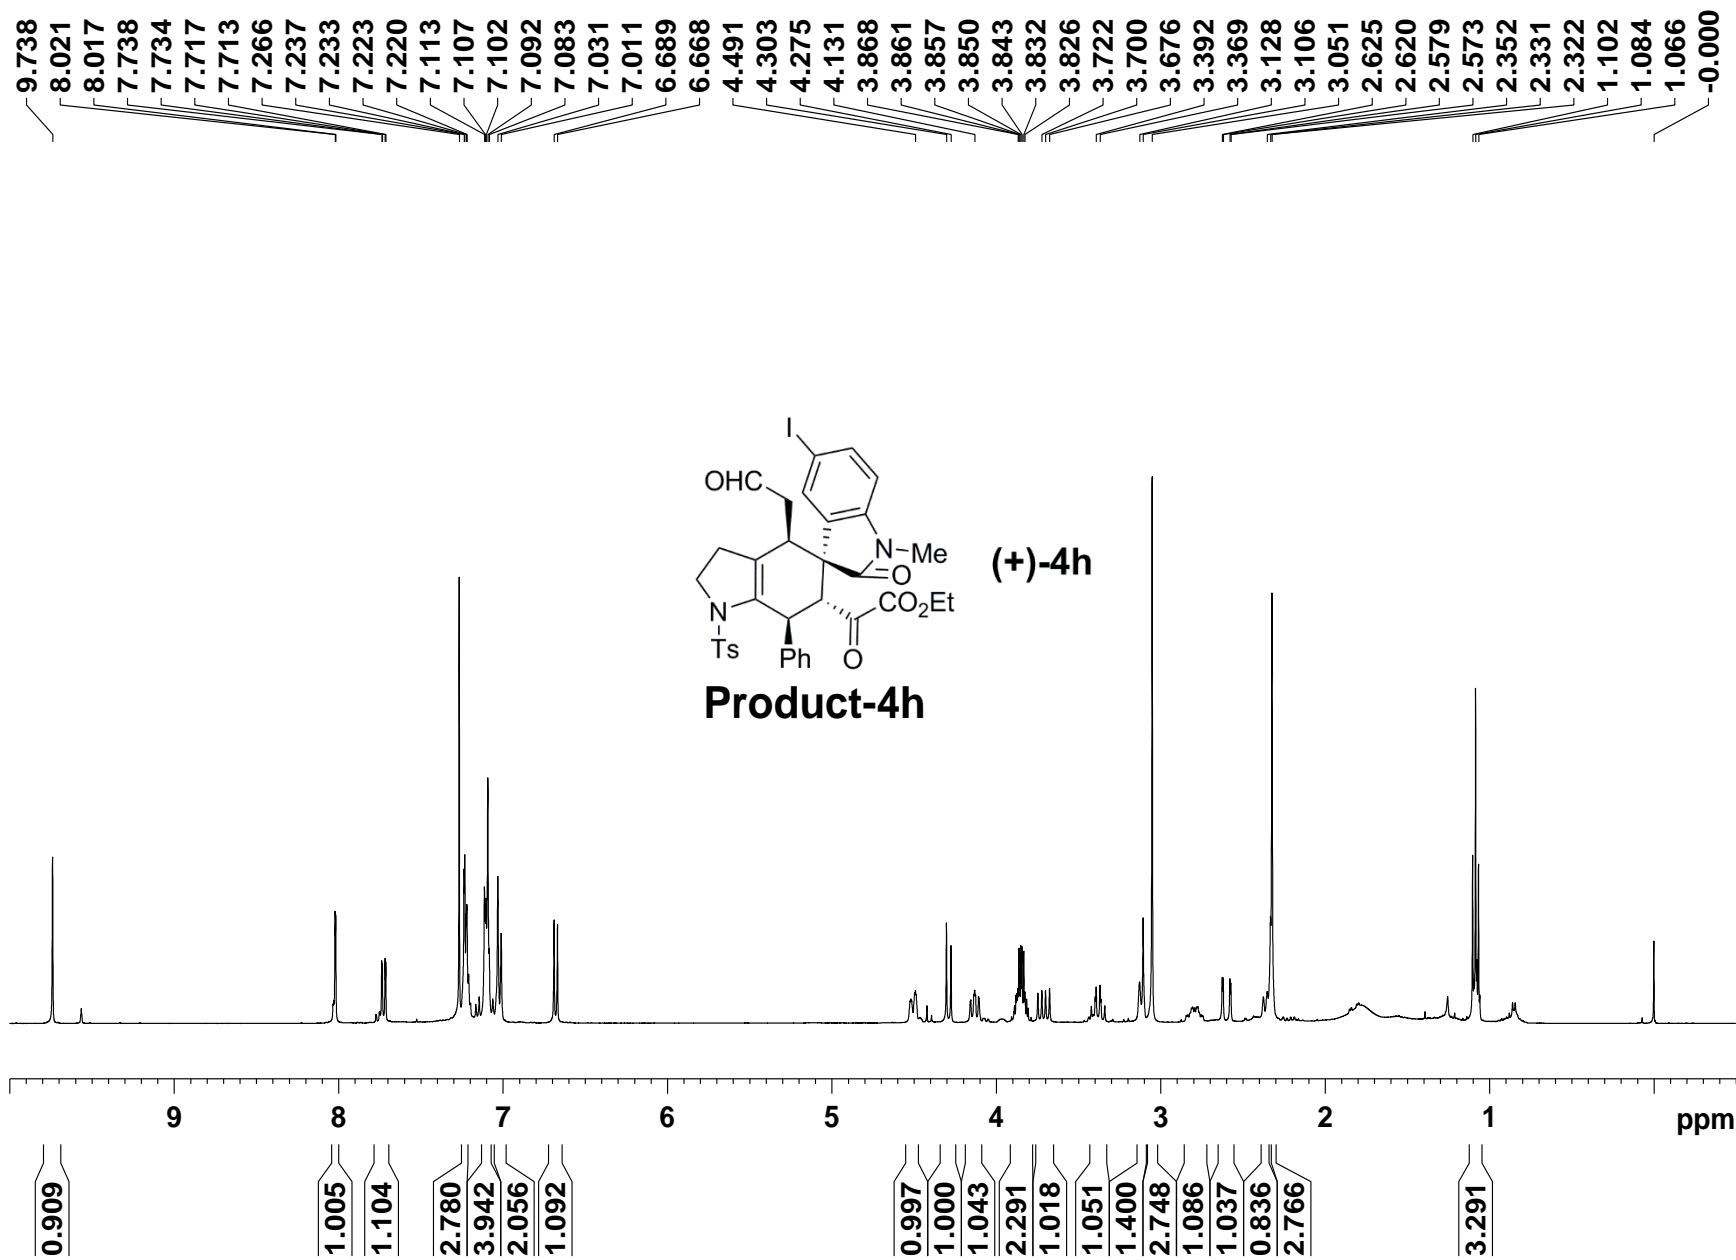



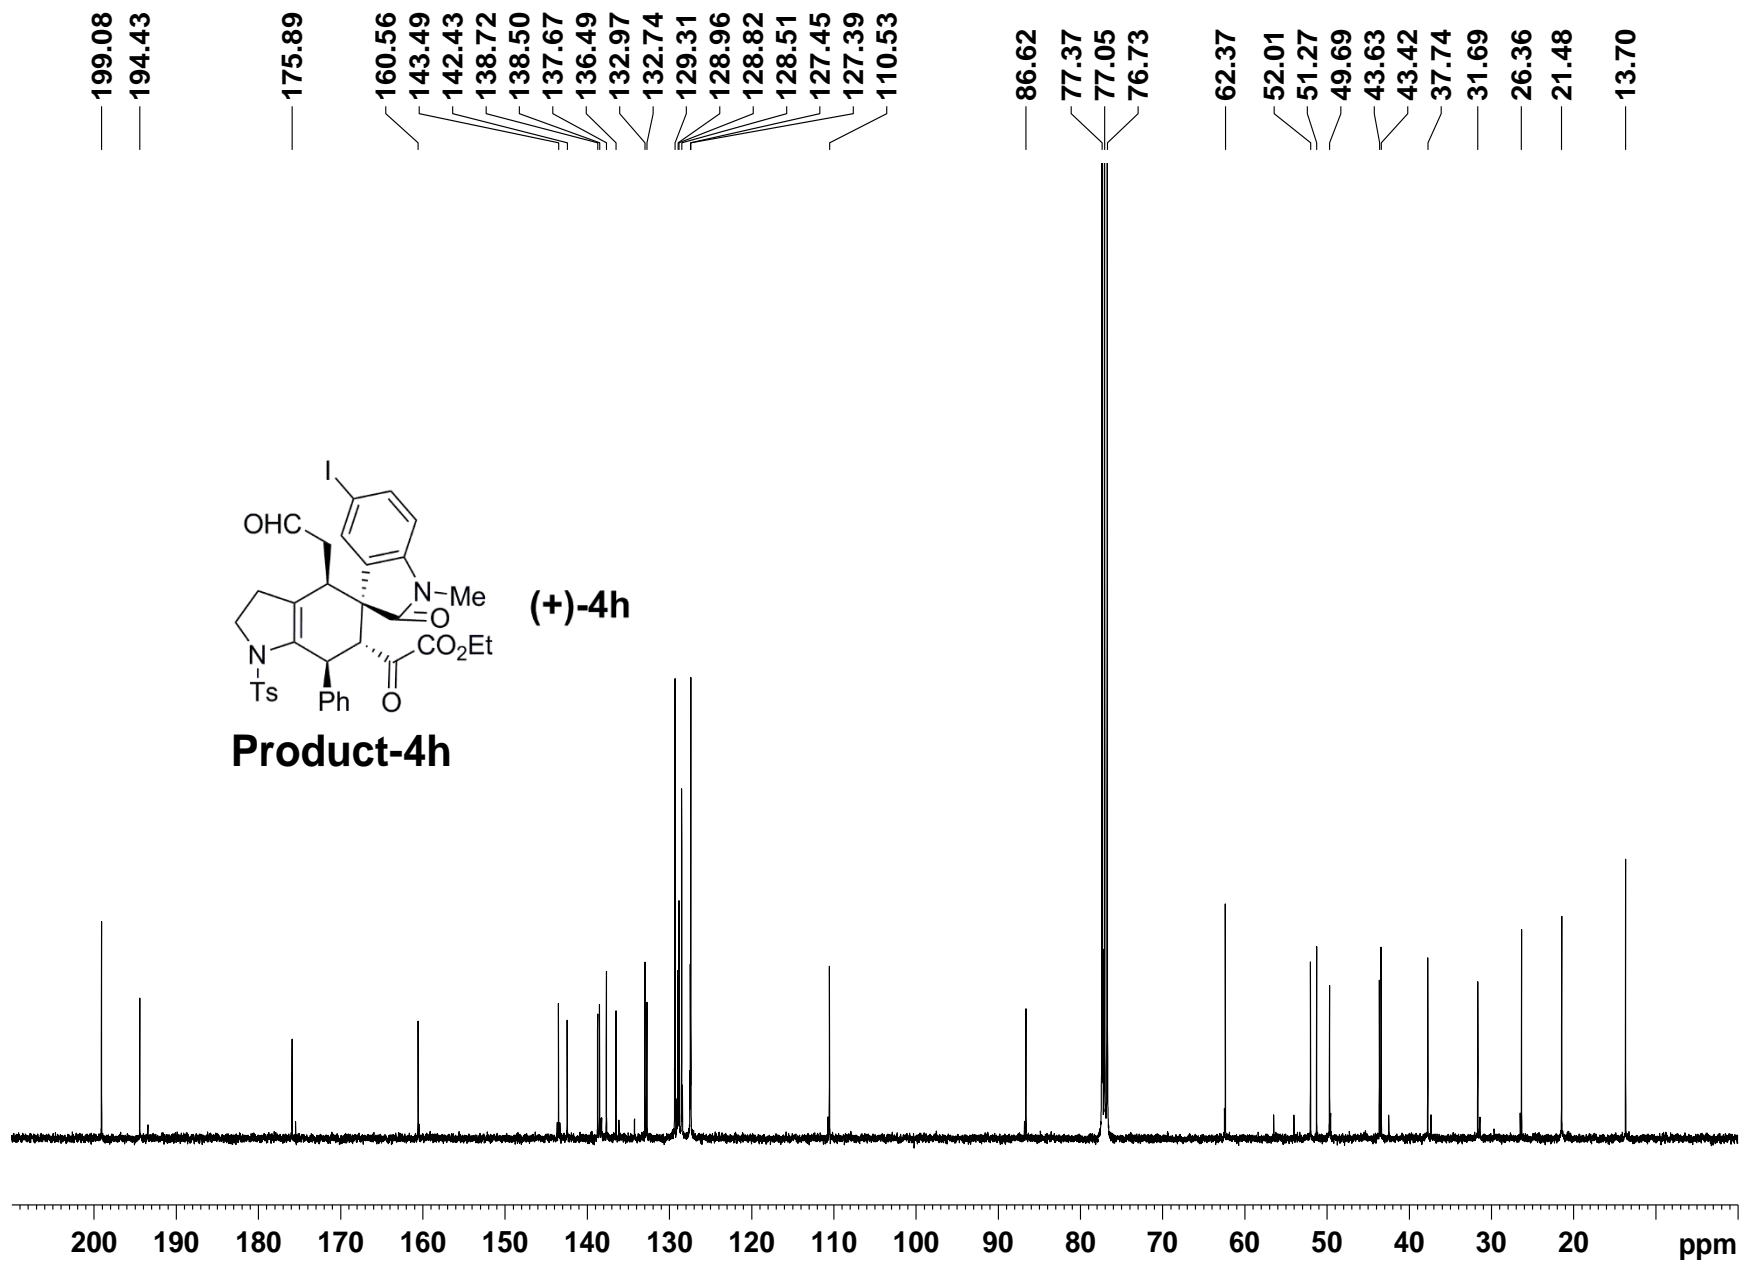

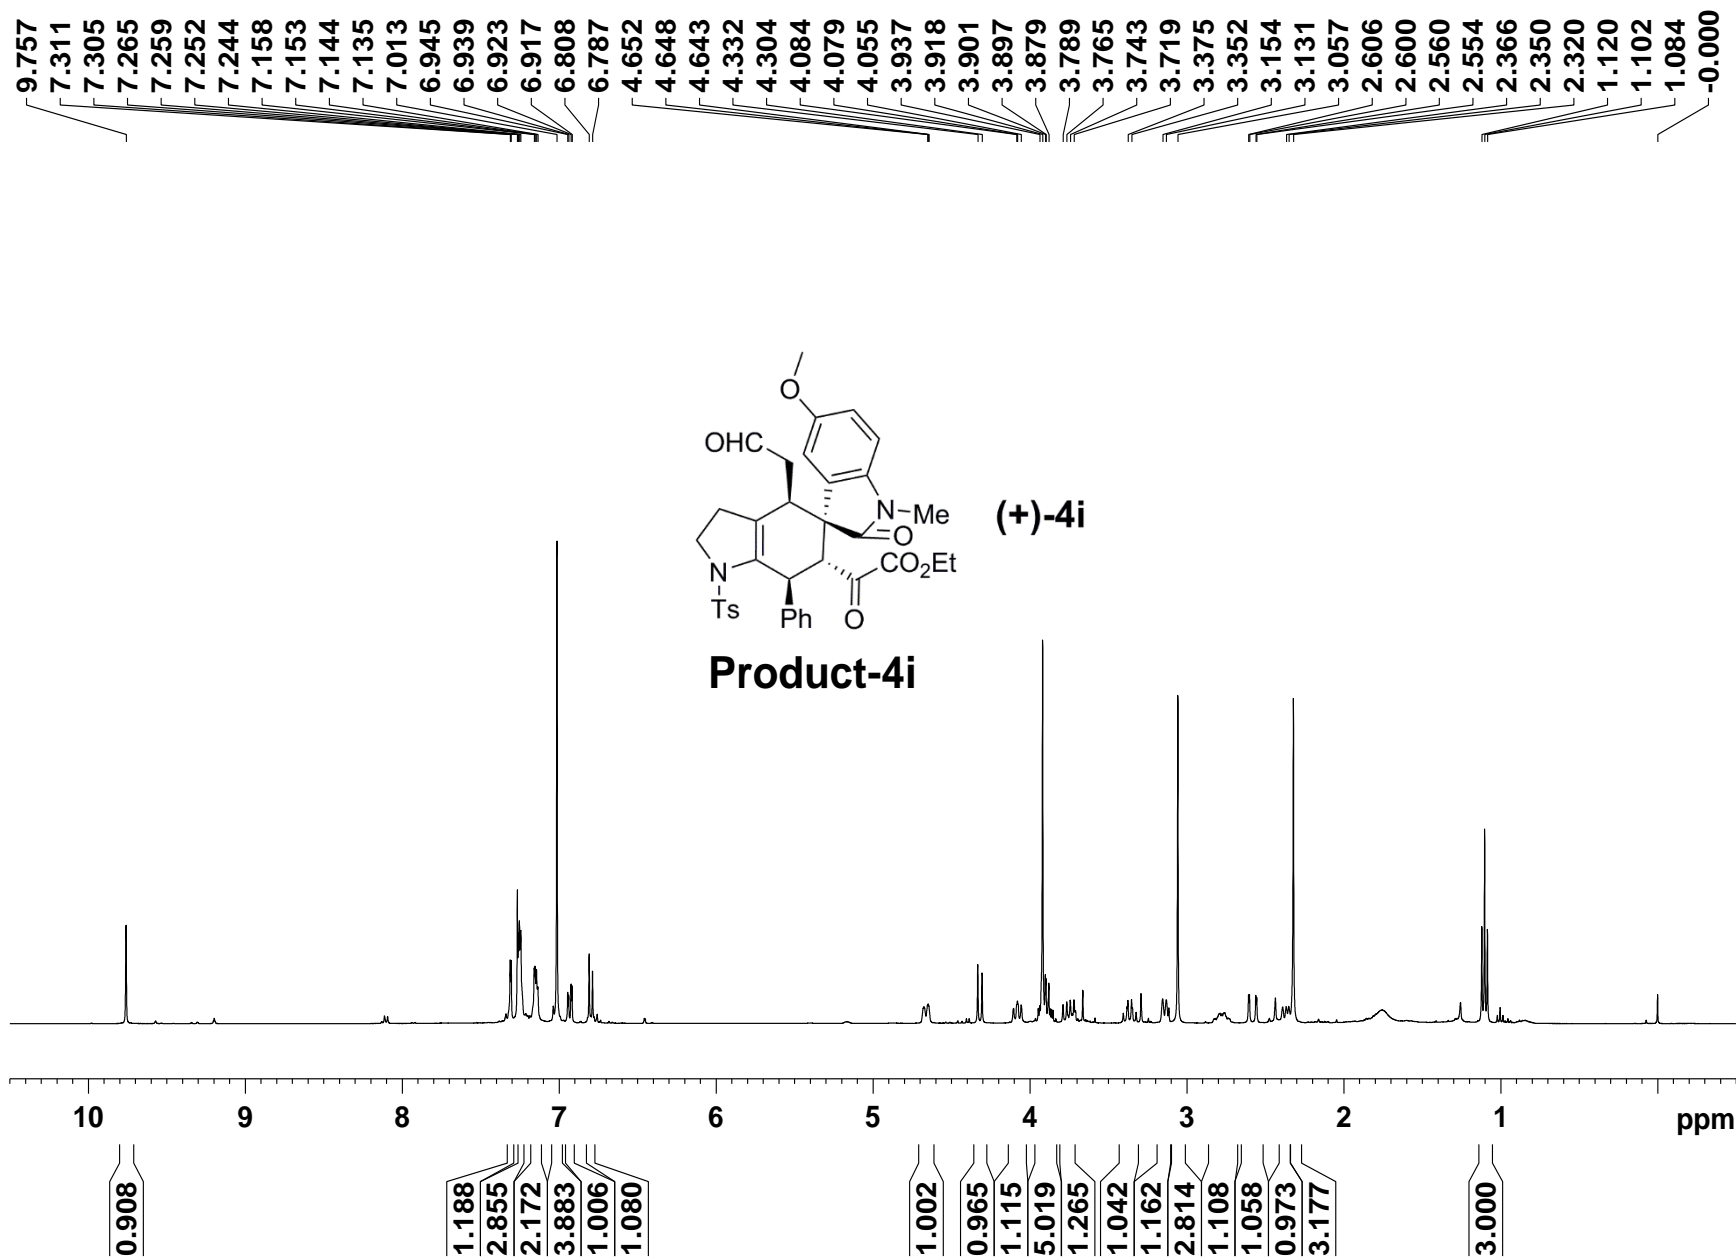

— 199.15  
— 194.24

— 175.82

160.91  
156.70  
143.50  
138.98  
138.63  
136.51  
135.91  
131.19  
129.32  
128.98  
128.81  
128.52  
127.35  
127.27  
114.94  
110.11  
109.17

77.37  
77.05  
76.73

62.29  
56.38  
52.15  
51.77  
49.66  
43.77  
43.23  
37.86  
31.70  
26.38  
21.47  
13.74

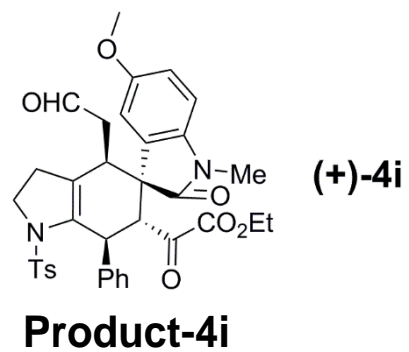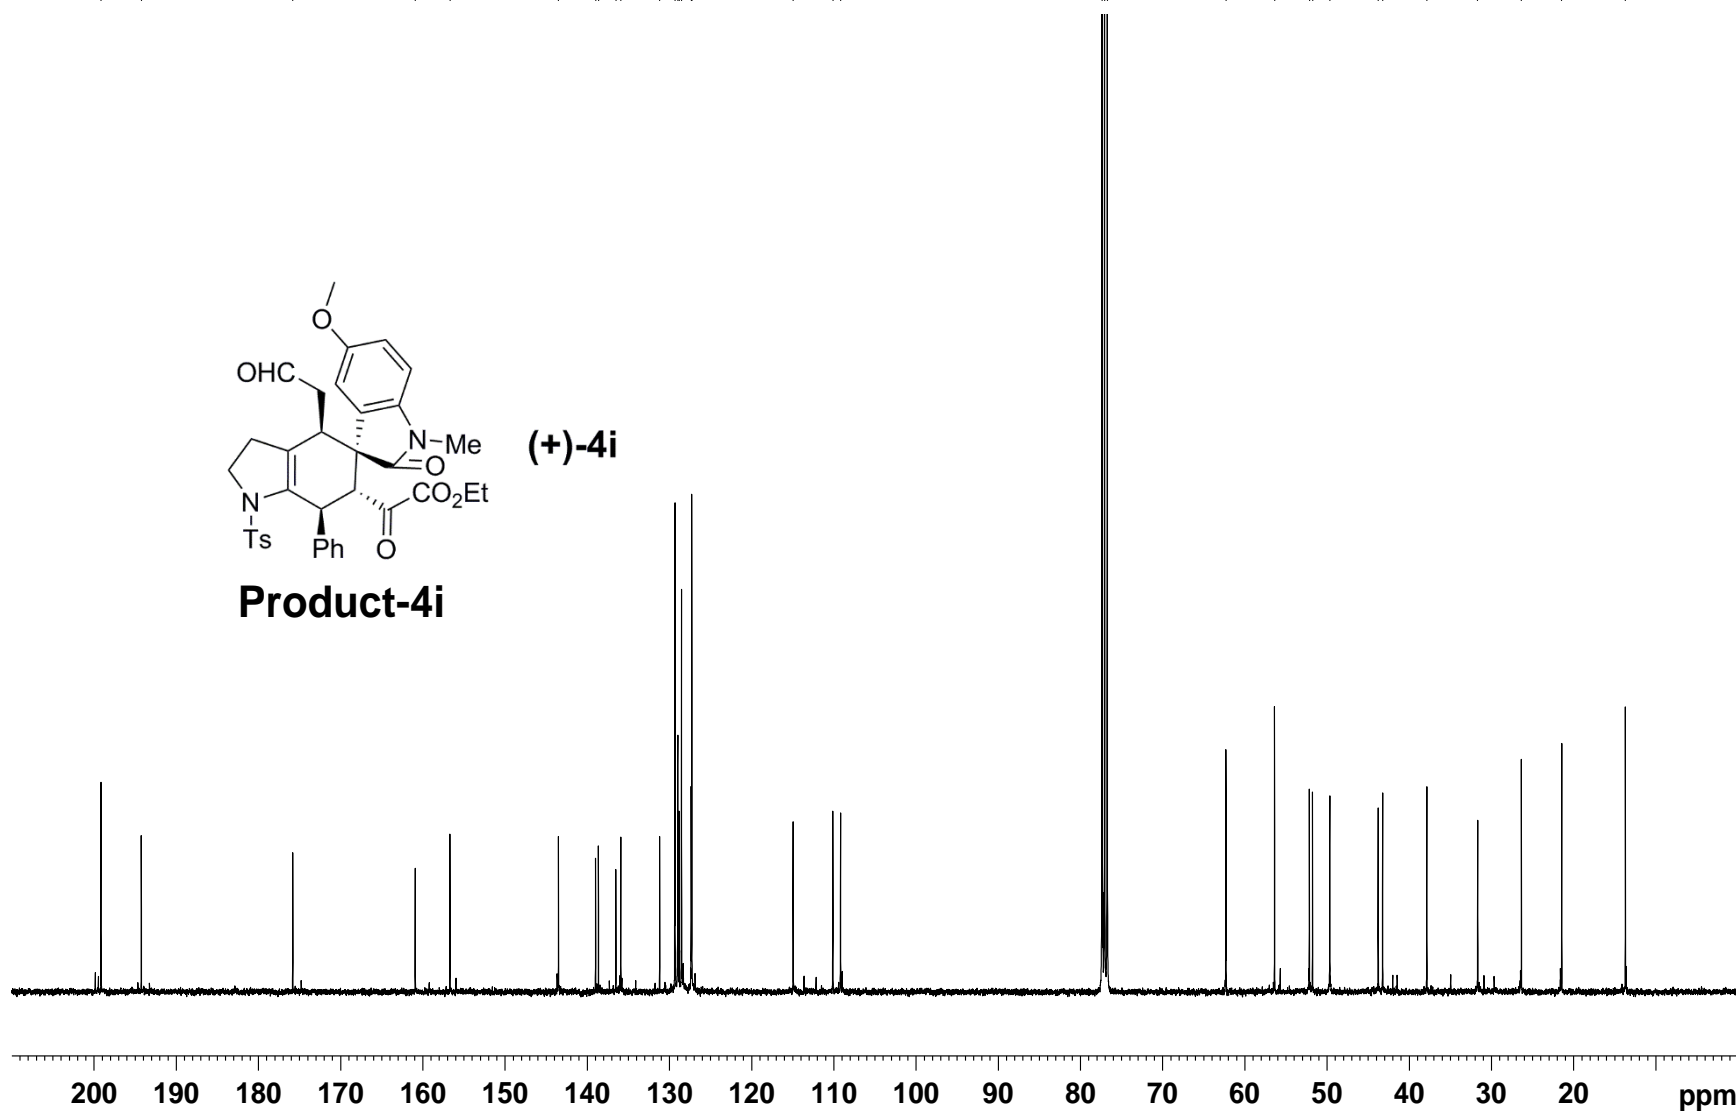

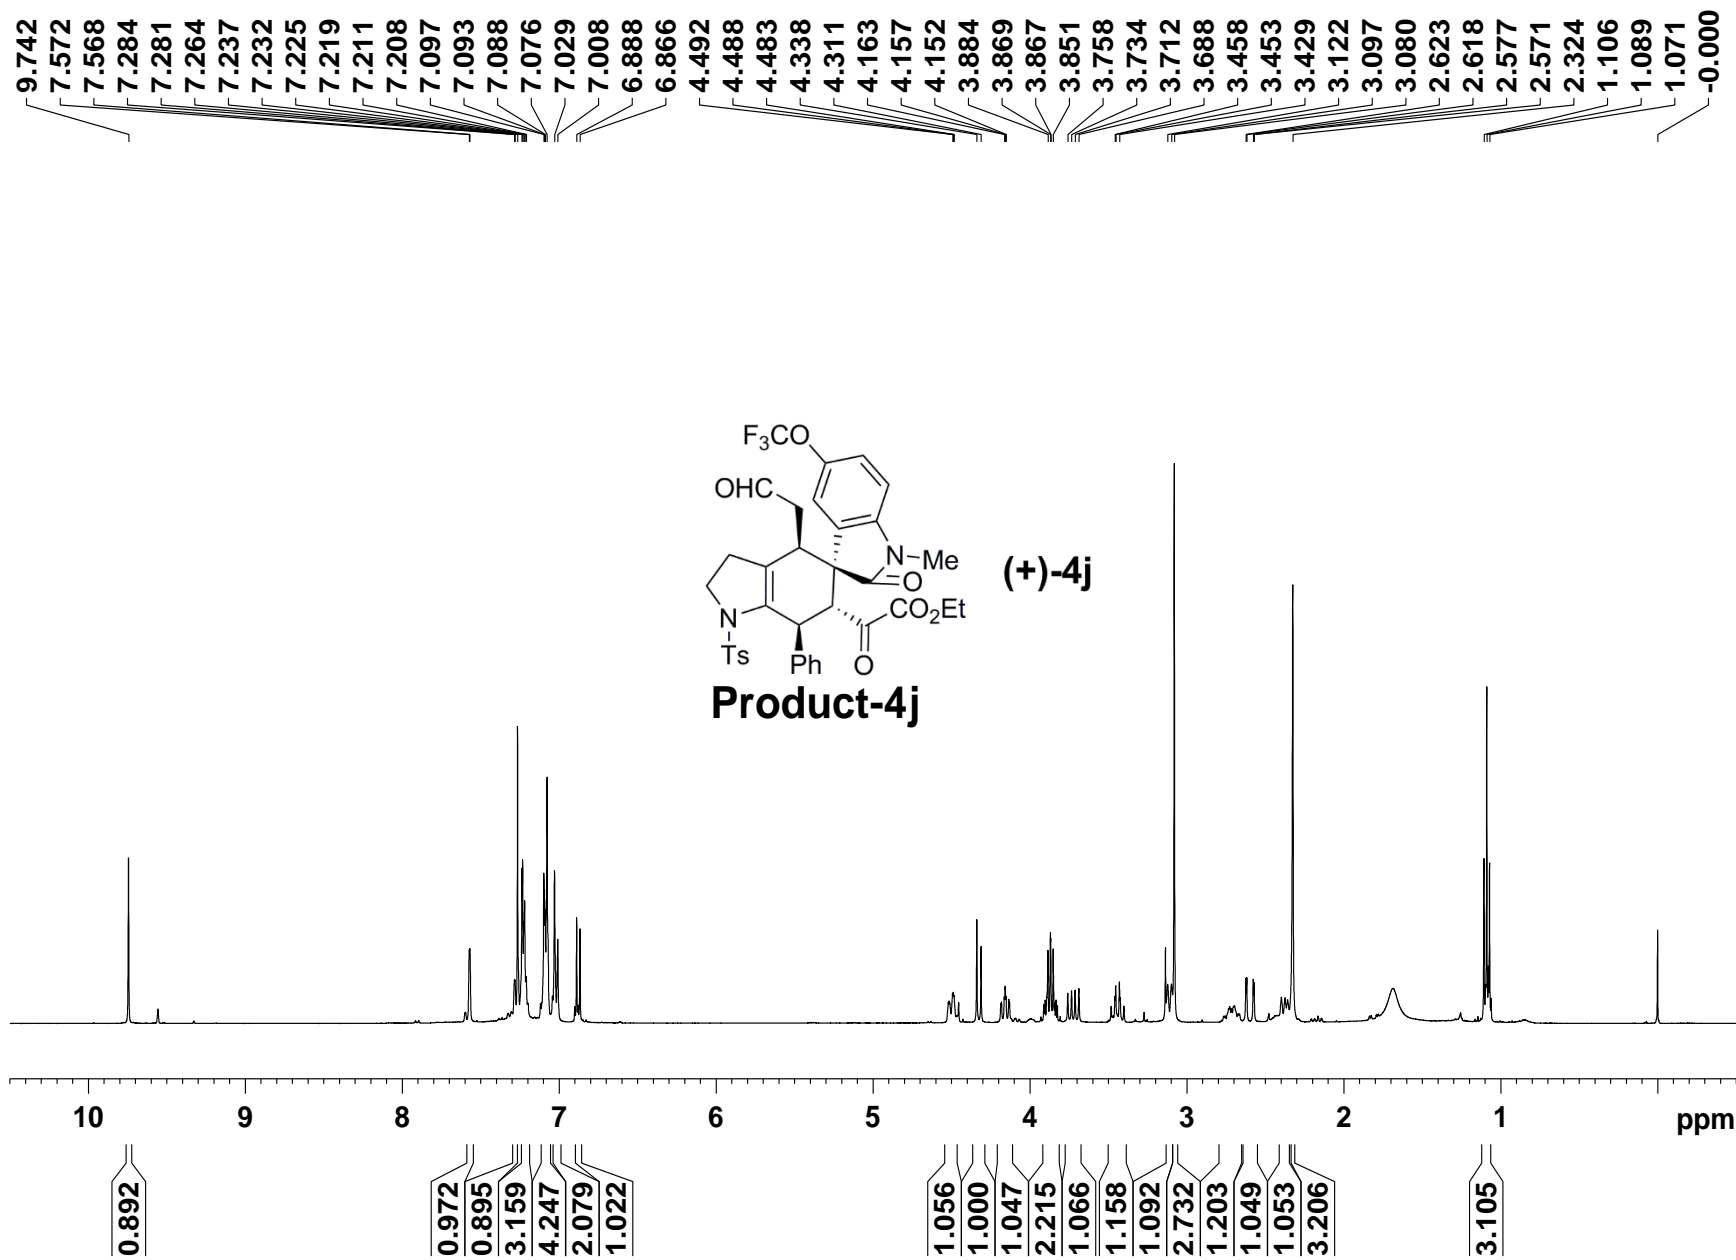

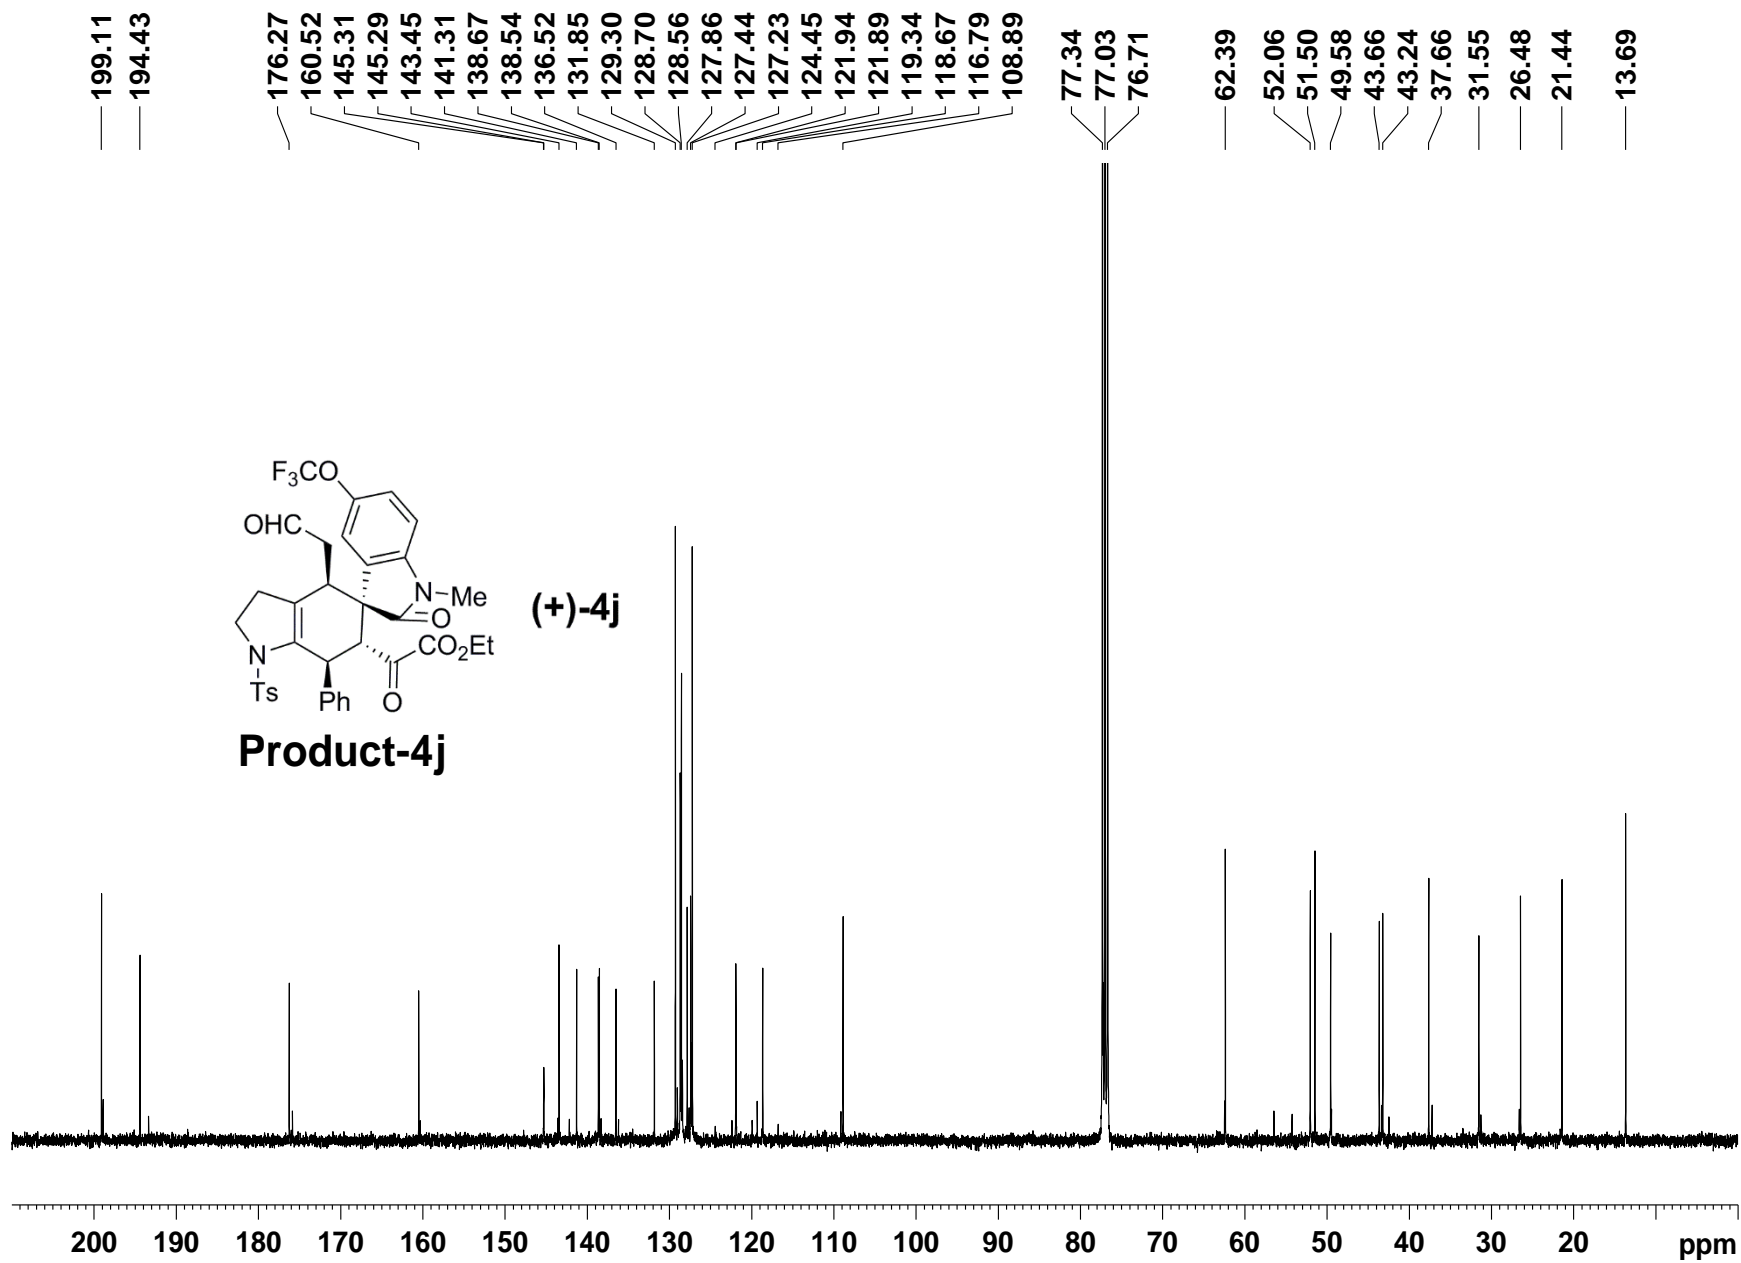

9.725  
7.800  
7.795  
7.685  
7.680  
7.264  
7.239  
7.235  
7.228  
7.221  
7.122  
7.101  
7.091  
7.087  
7.080  
7.074  
7.067  
7.032  
7.012  
4.436  
4.430  
4.326  
4.298  
4.131  
3.866  
3.863  
3.858  
3.845  
3.840  
3.827  
3.822  
3.721  
3.696  
3.674  
3.649  
3.423  
3.415  
3.408  
3.385  
3.107  
3.084  
2.631  
2.626  
2.584  
2.579  
2.351  
2.325  
1.105  
1.087  
1.069  
-0.000

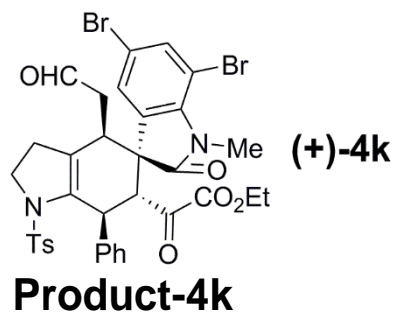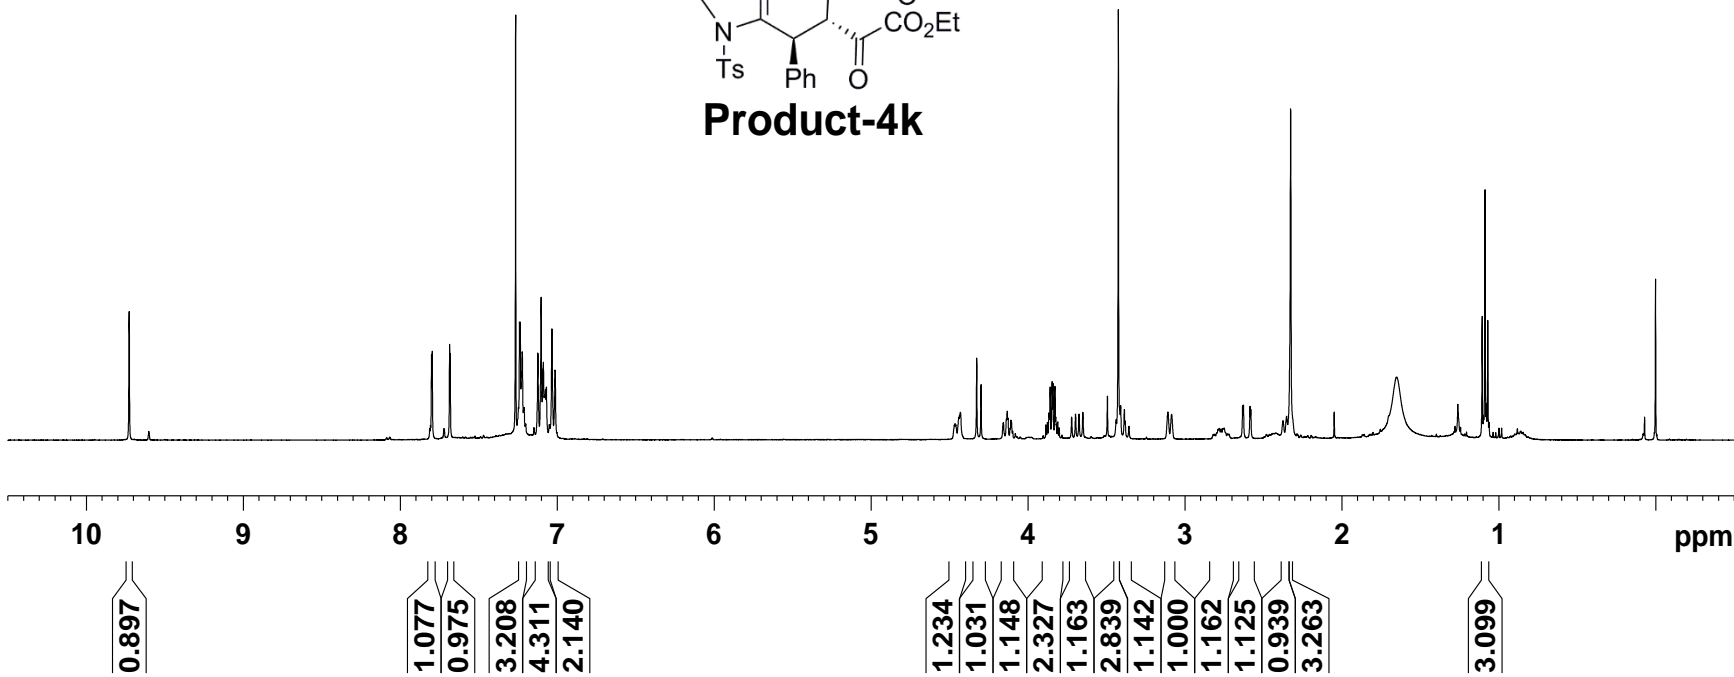

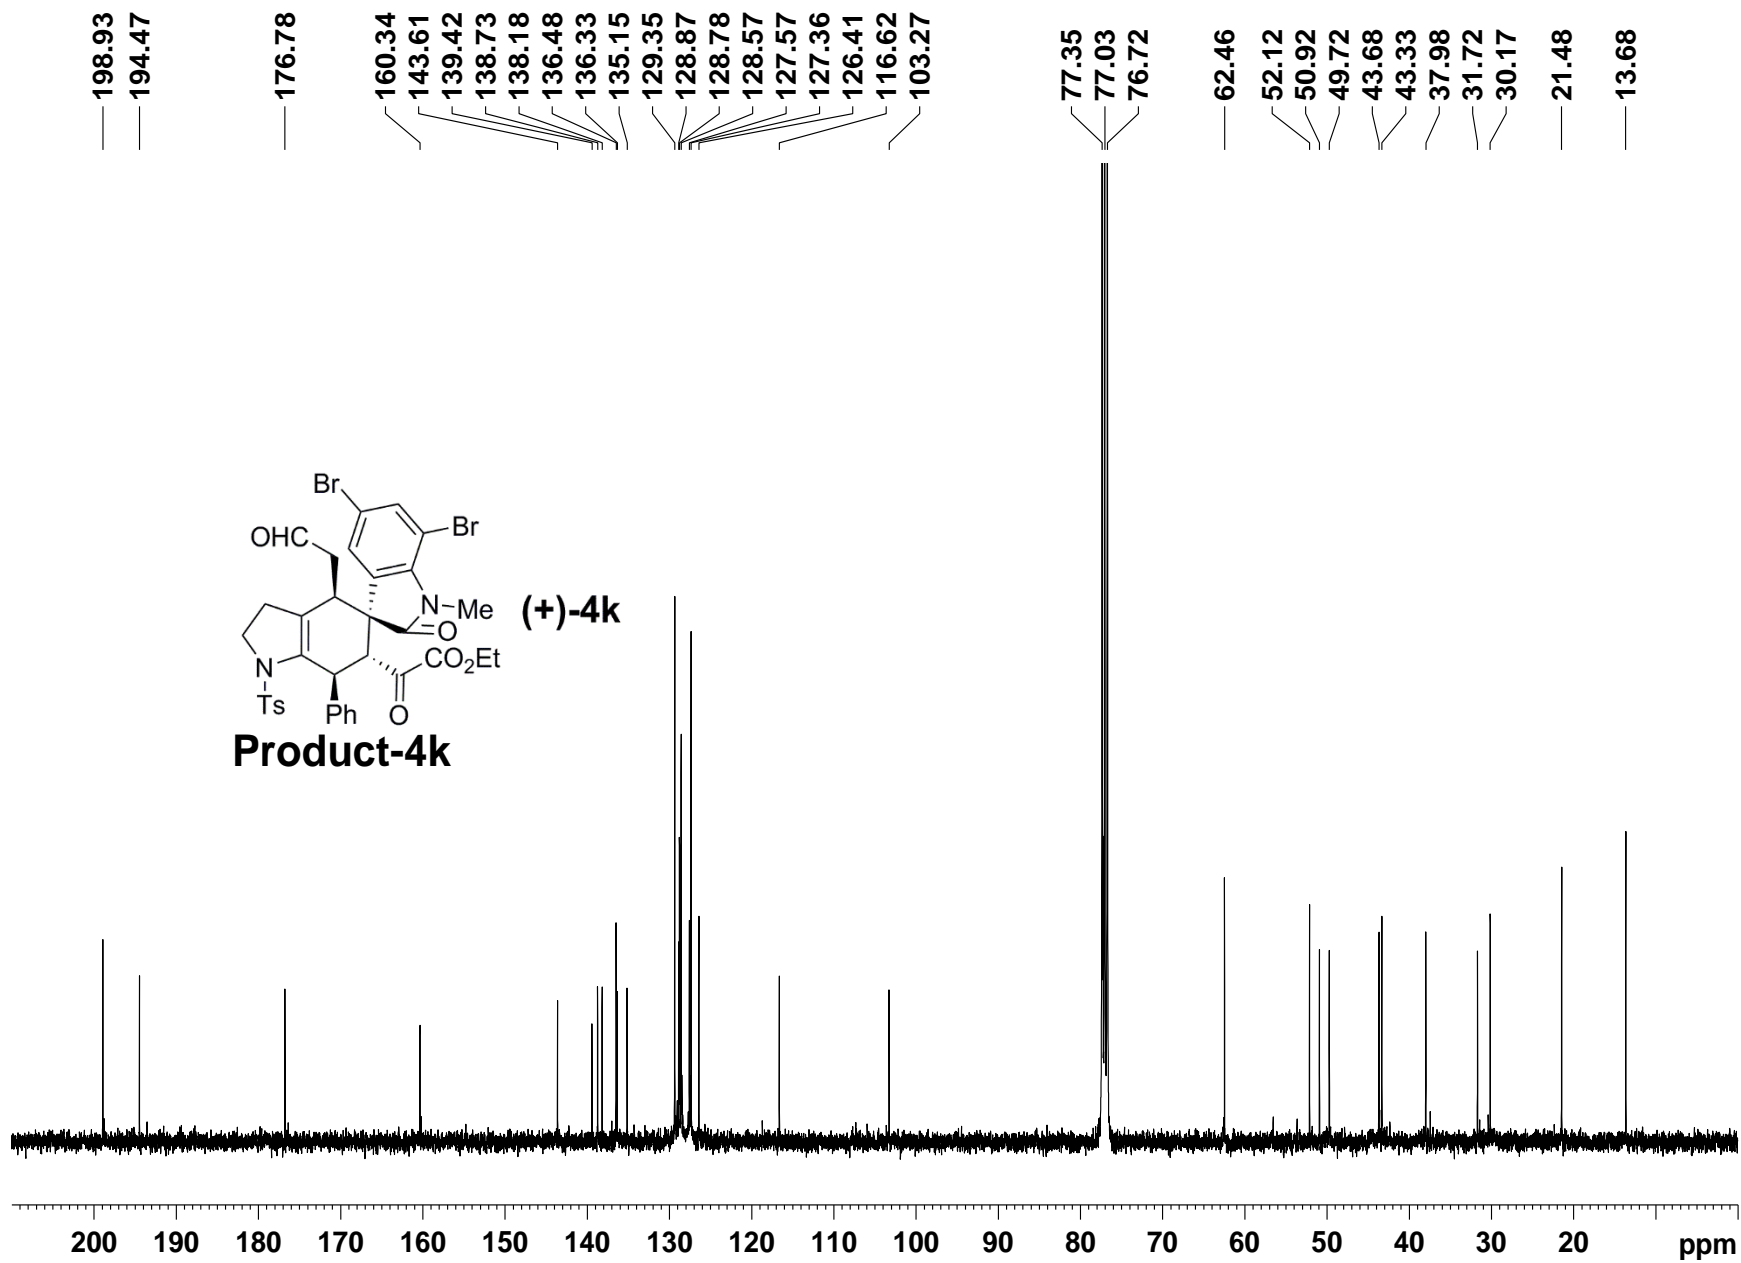

9.727  
7.531  
7.527  
7.266  
7.229  
7.223  
7.214  
7.191  
7.170  
7.119  
7.115  
7.091  
7.086  
7.077  
7.064  
7.043  
4.512  
4.489  
4.485  
4.292  
4.264  
4.121  
4.116  
4.092  
3.893  
3.887  
3.876  
3.869  
3.858  
3.851  
3.734  
3.710  
3.688  
3.663  
3.457  
3.451  
3.428  
3.422  
3.306  
3.089  
3.065  
2.599  
2.594  
2.557  
2.358  
2.333  
1.651  
1.108  
1.090  
1.072  
-0.000

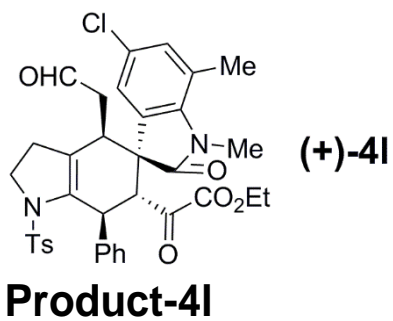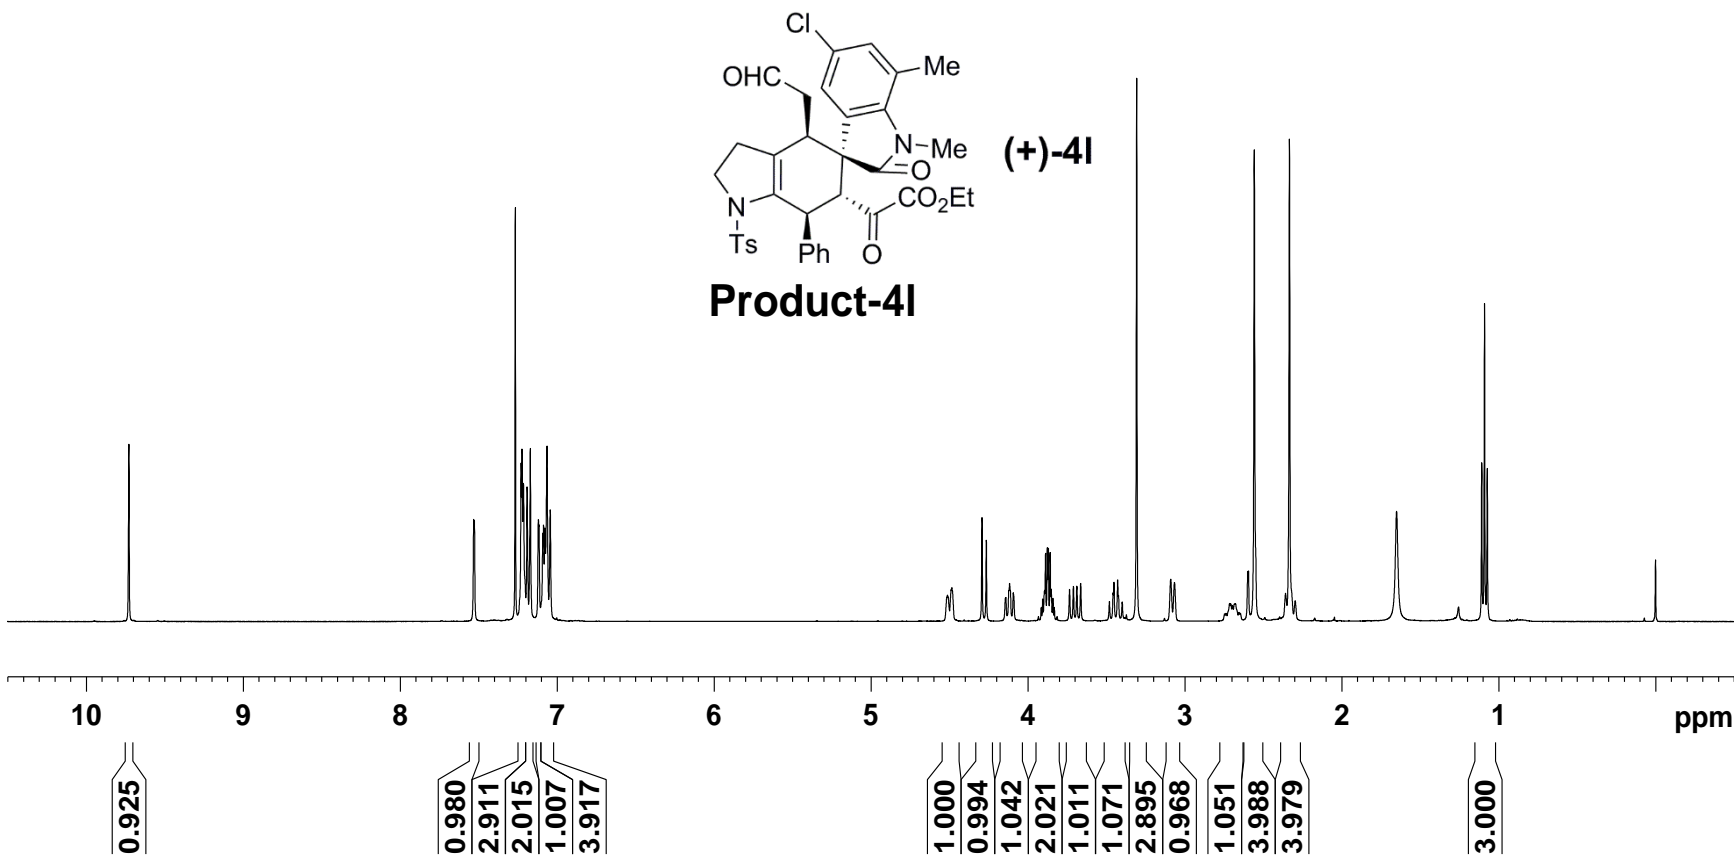



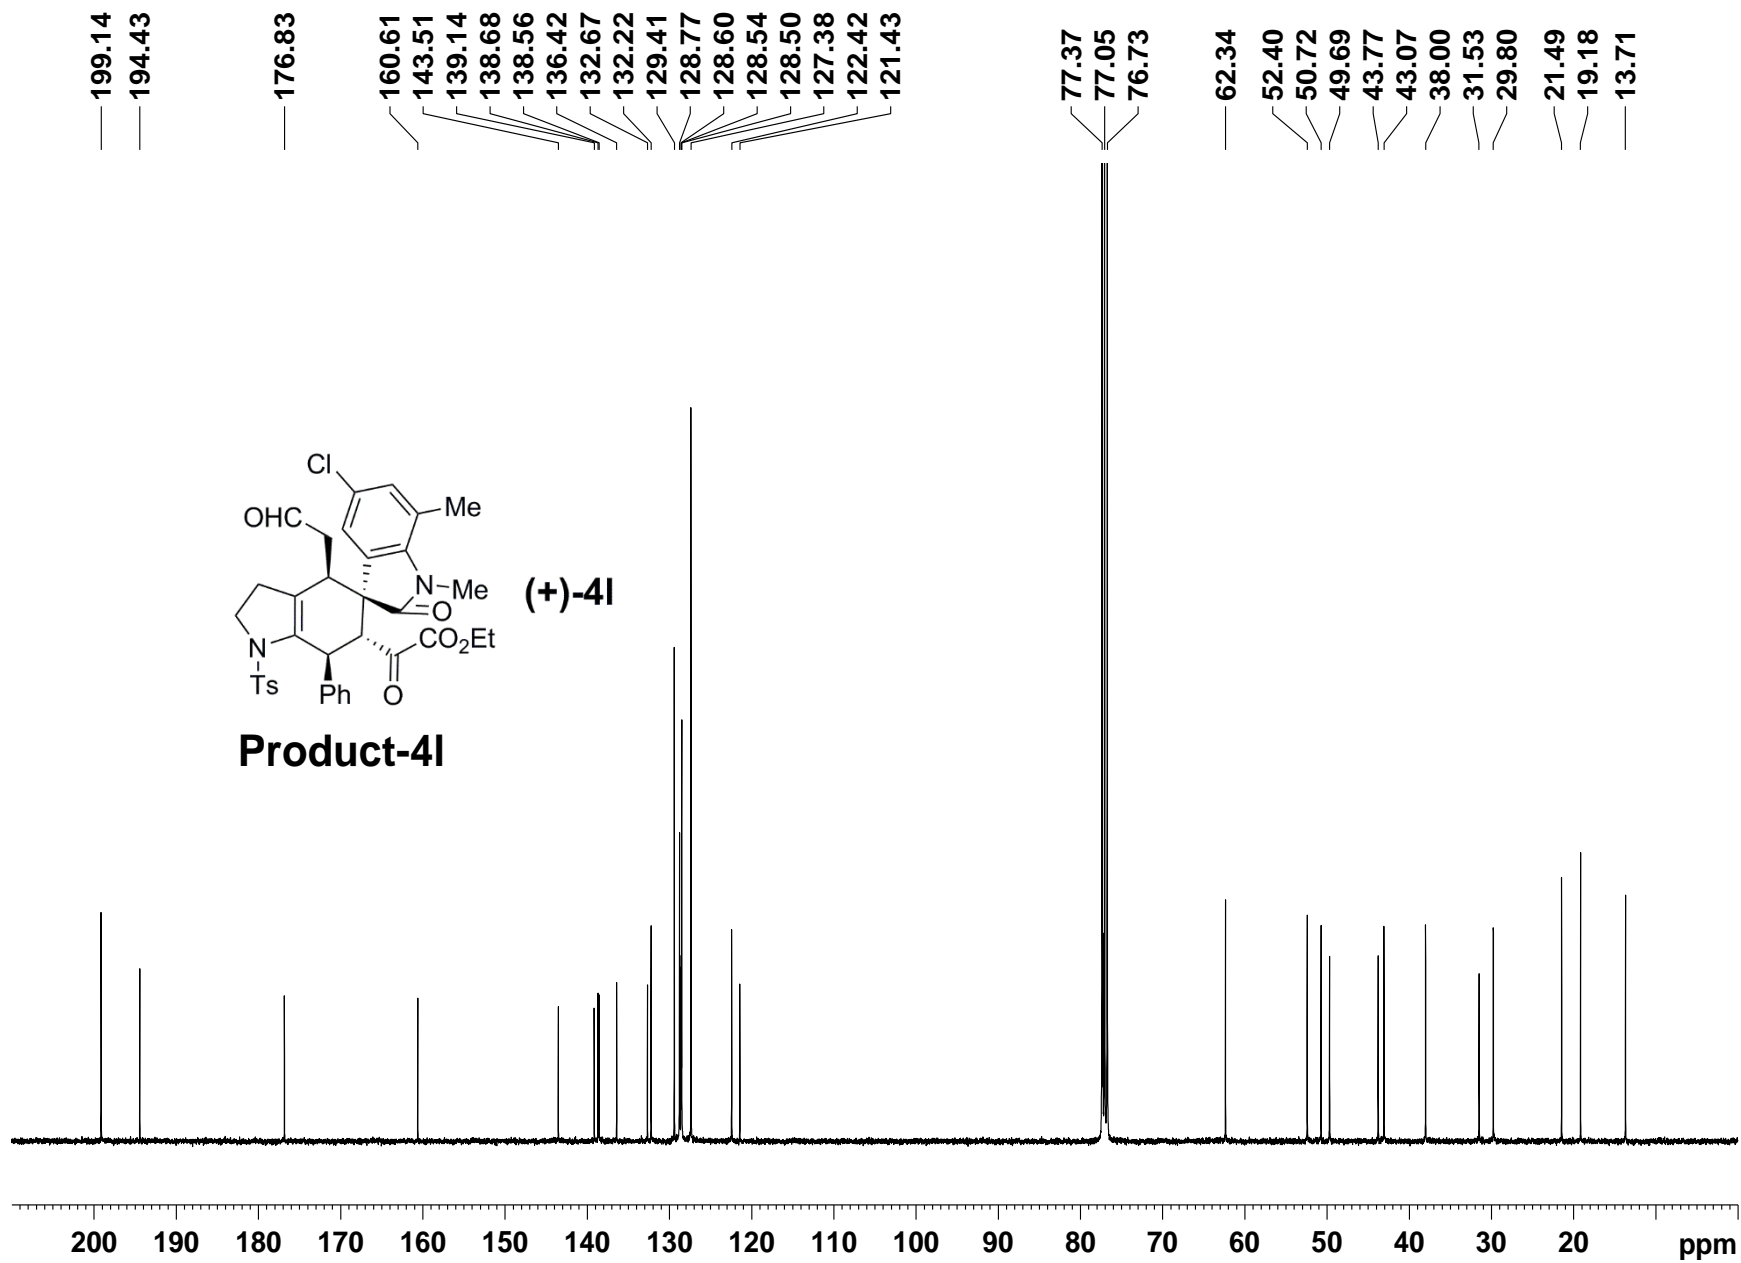

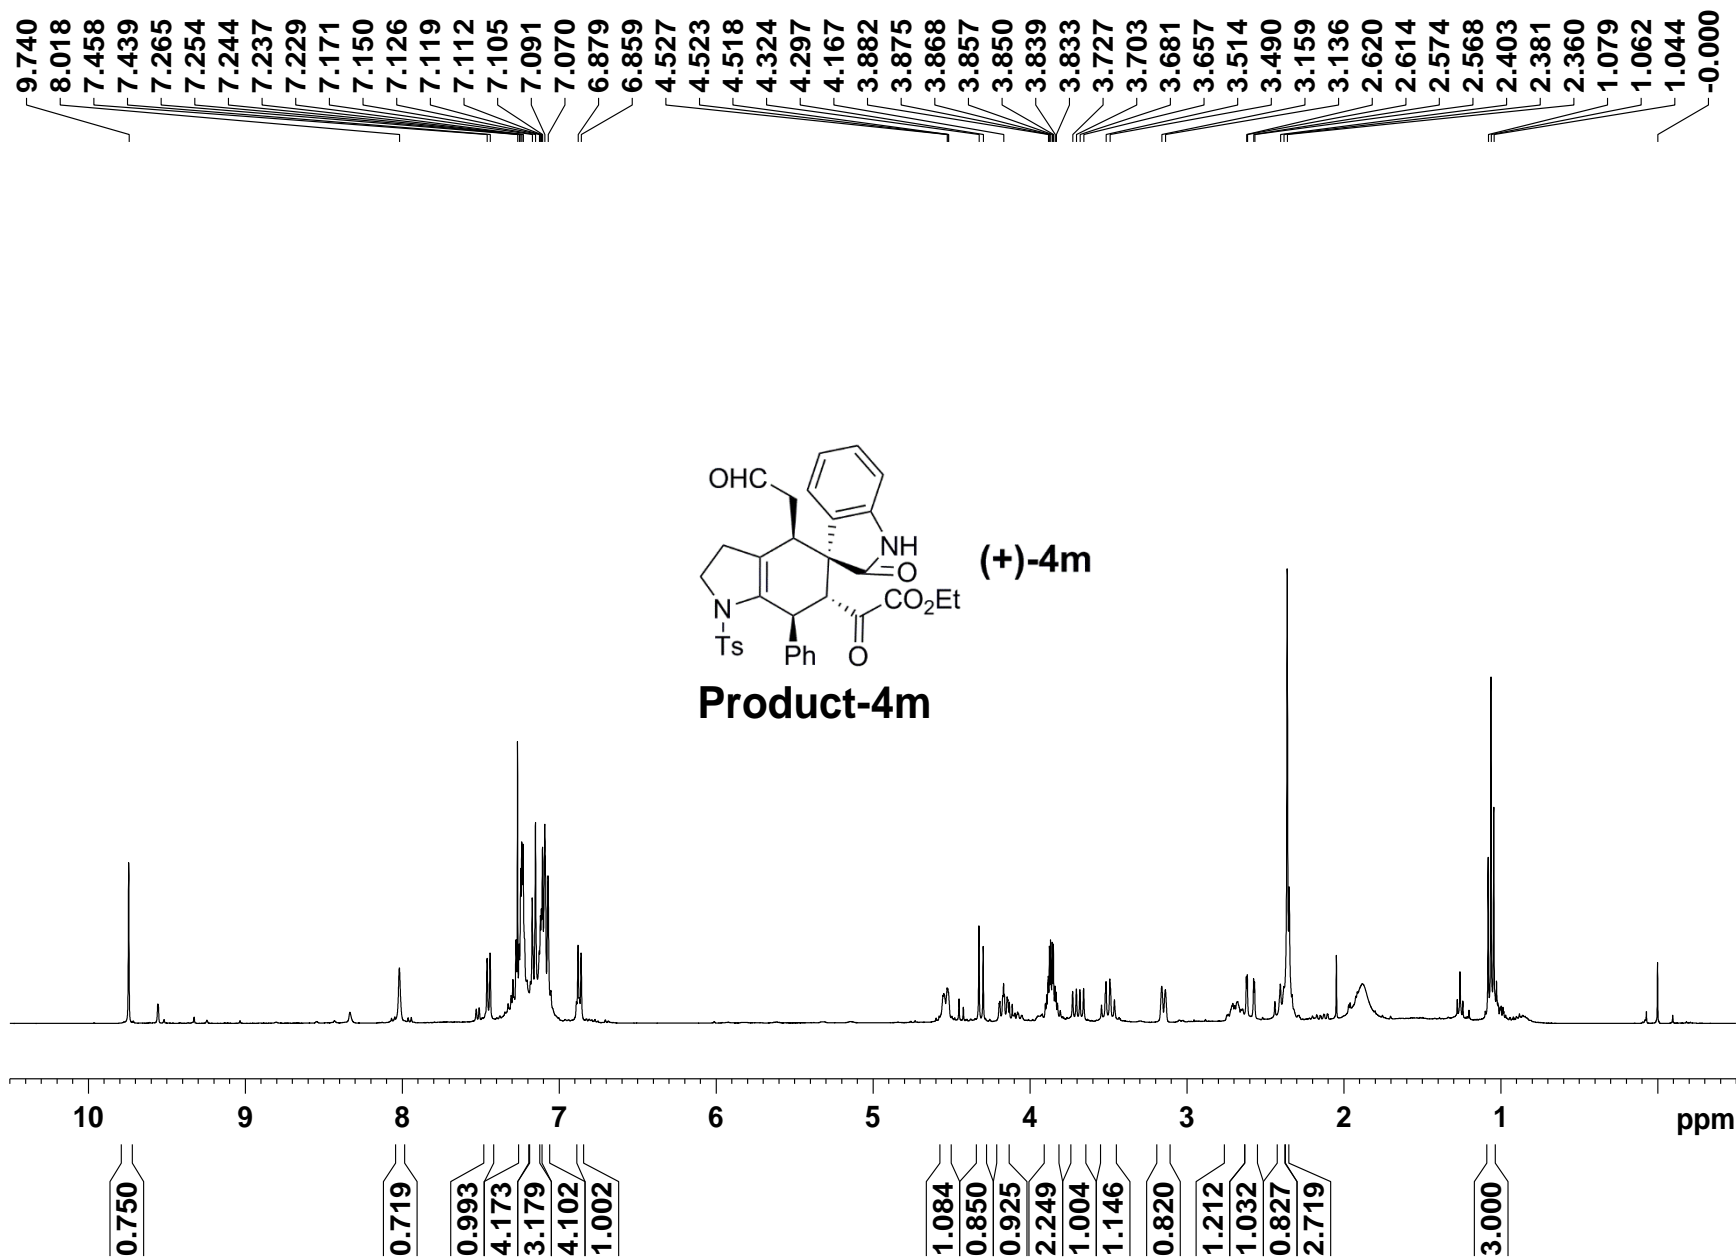

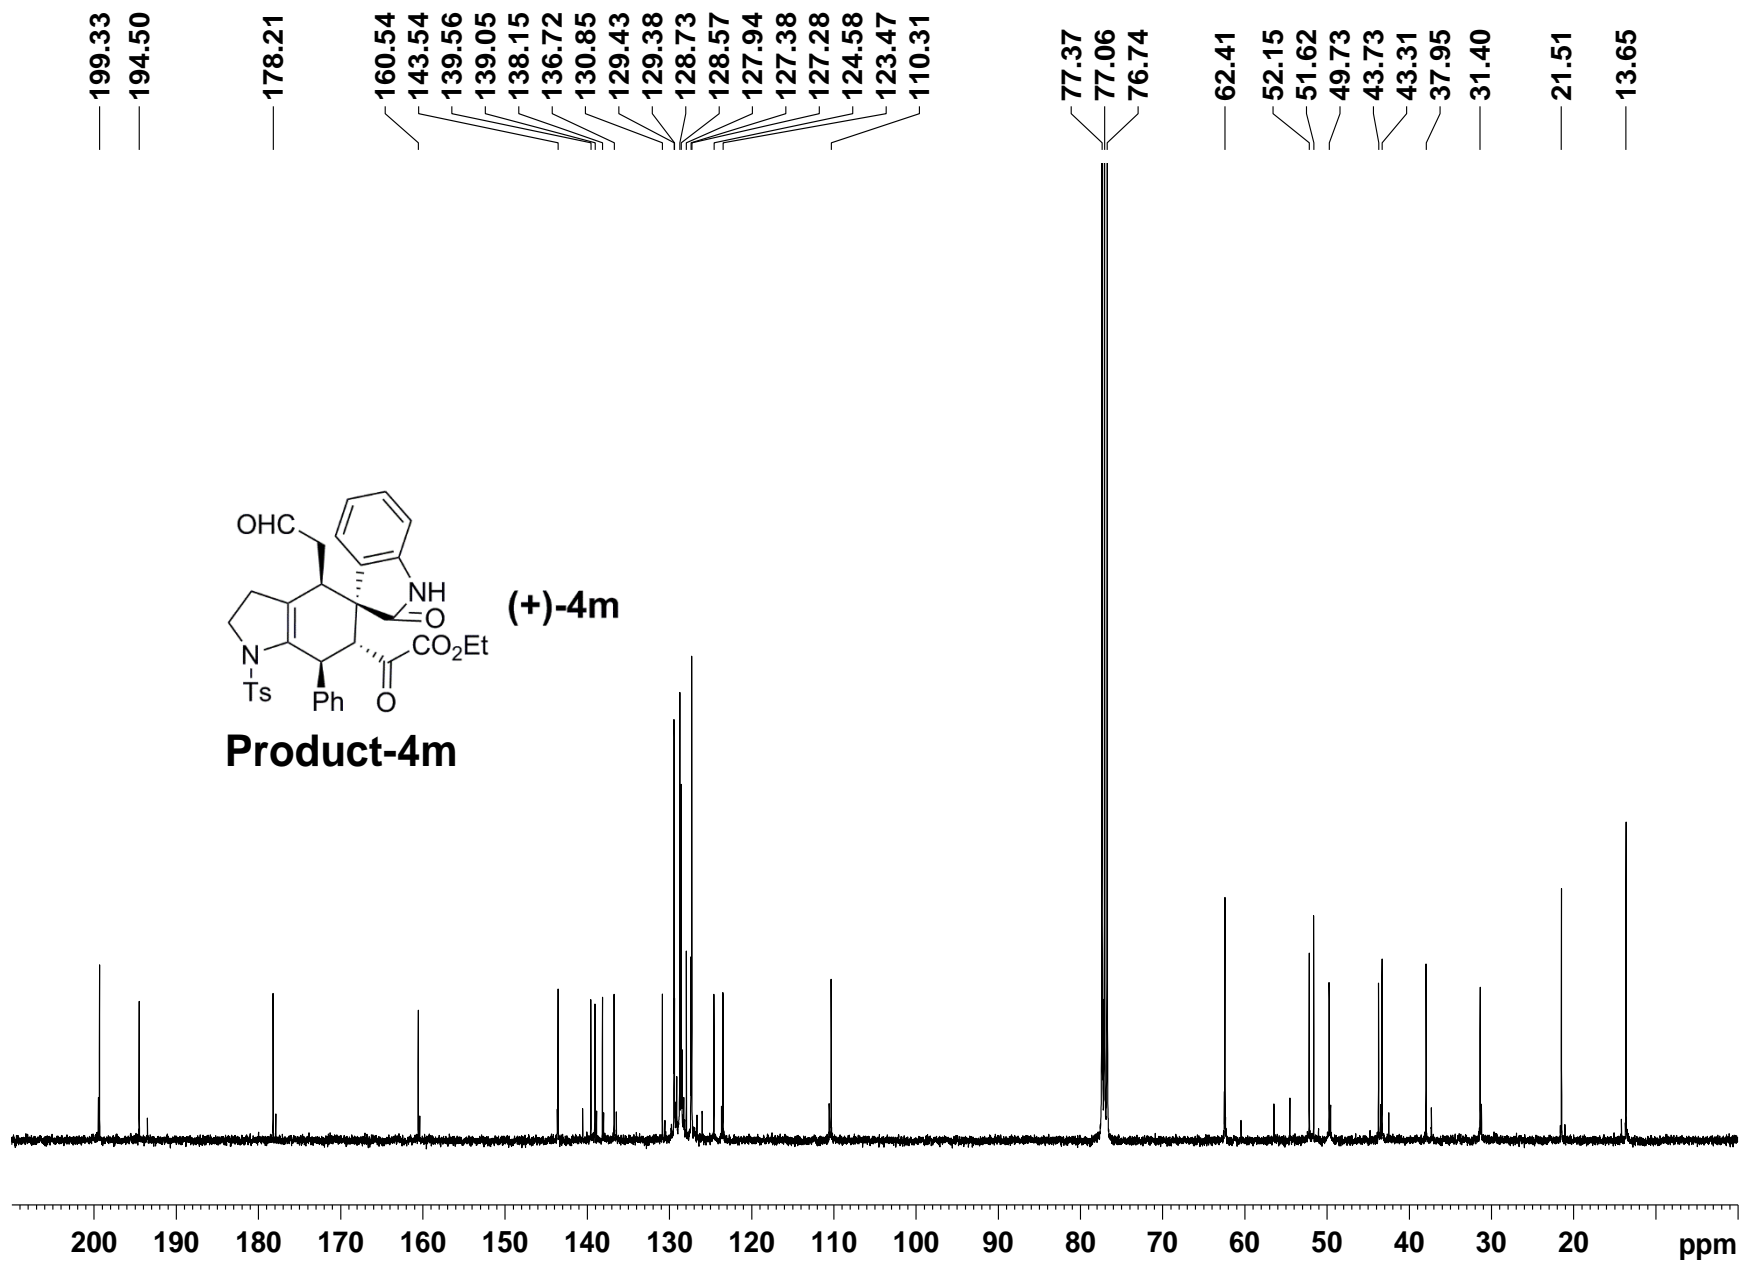

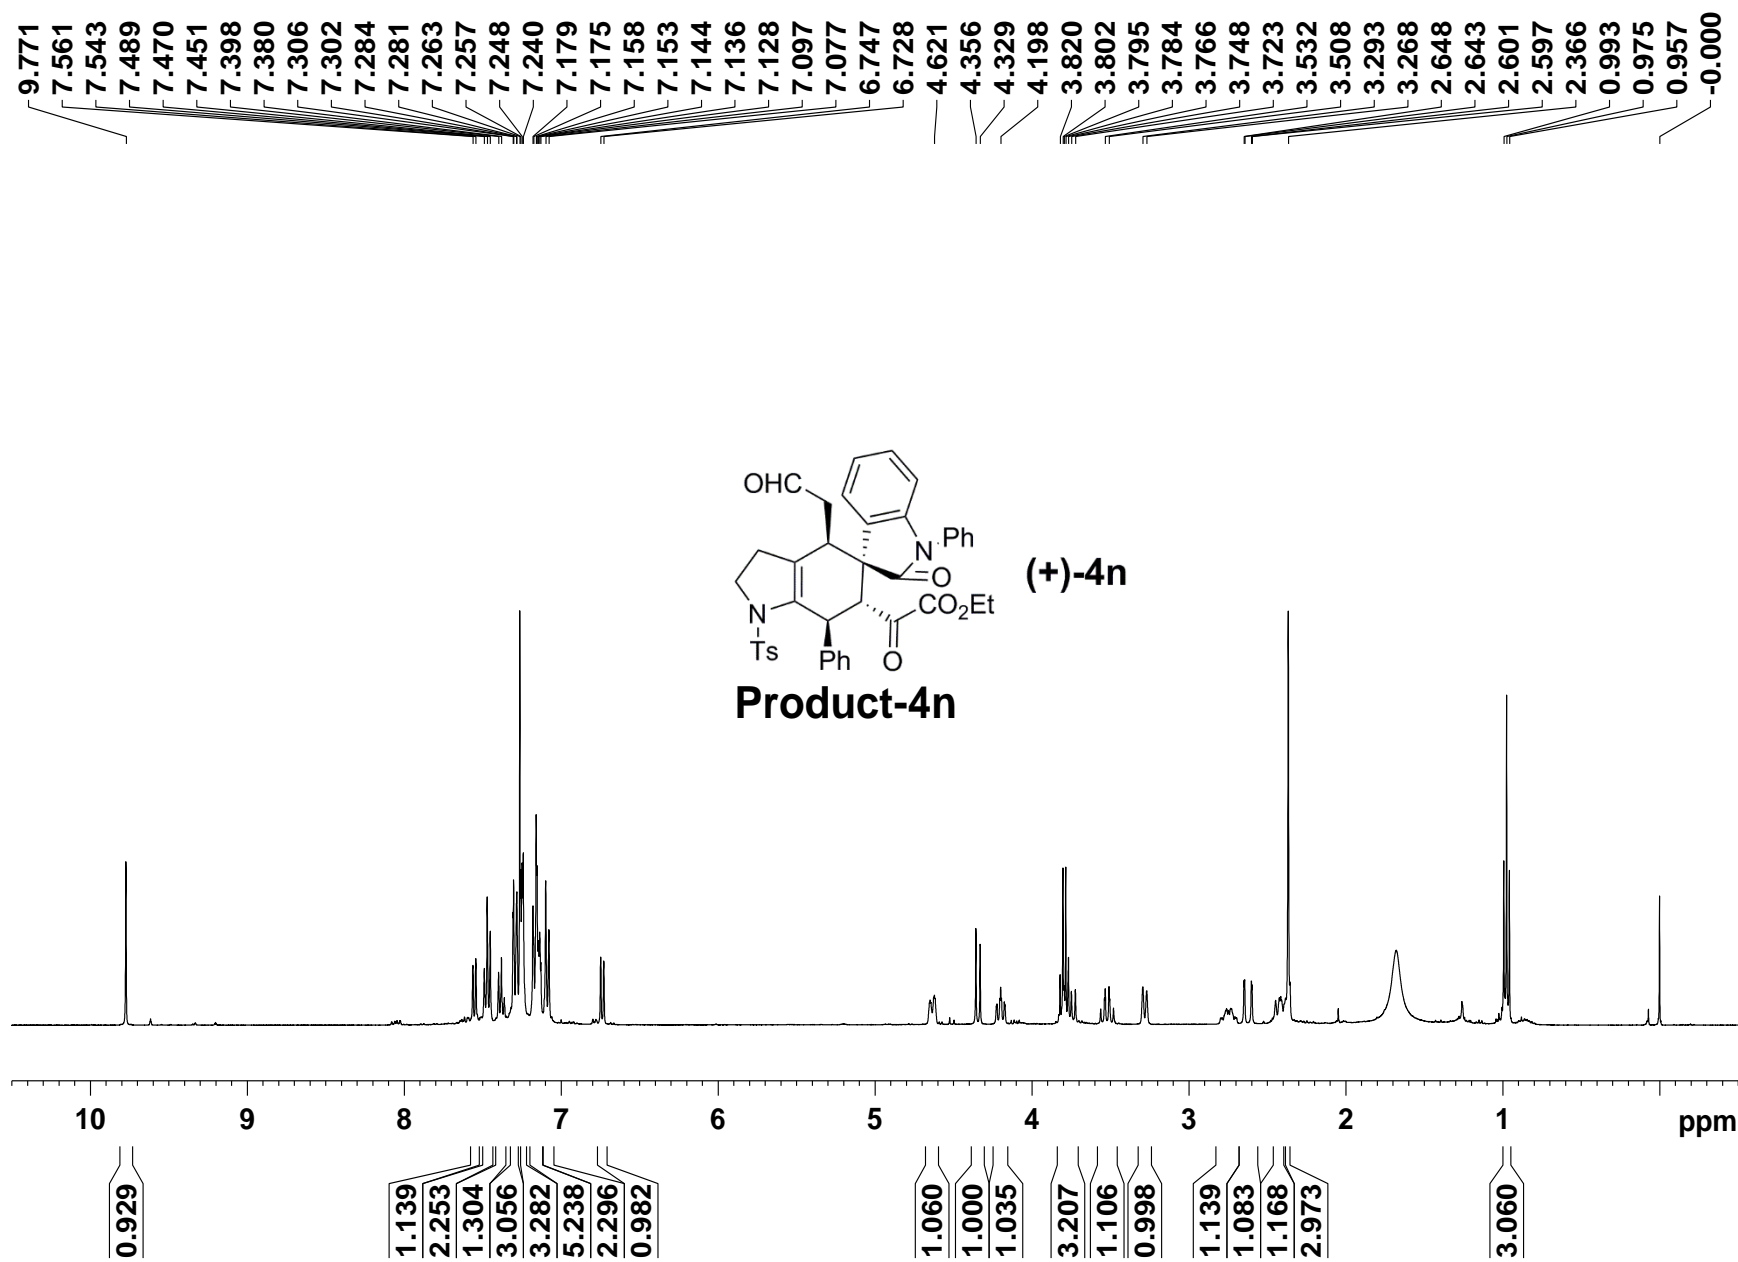

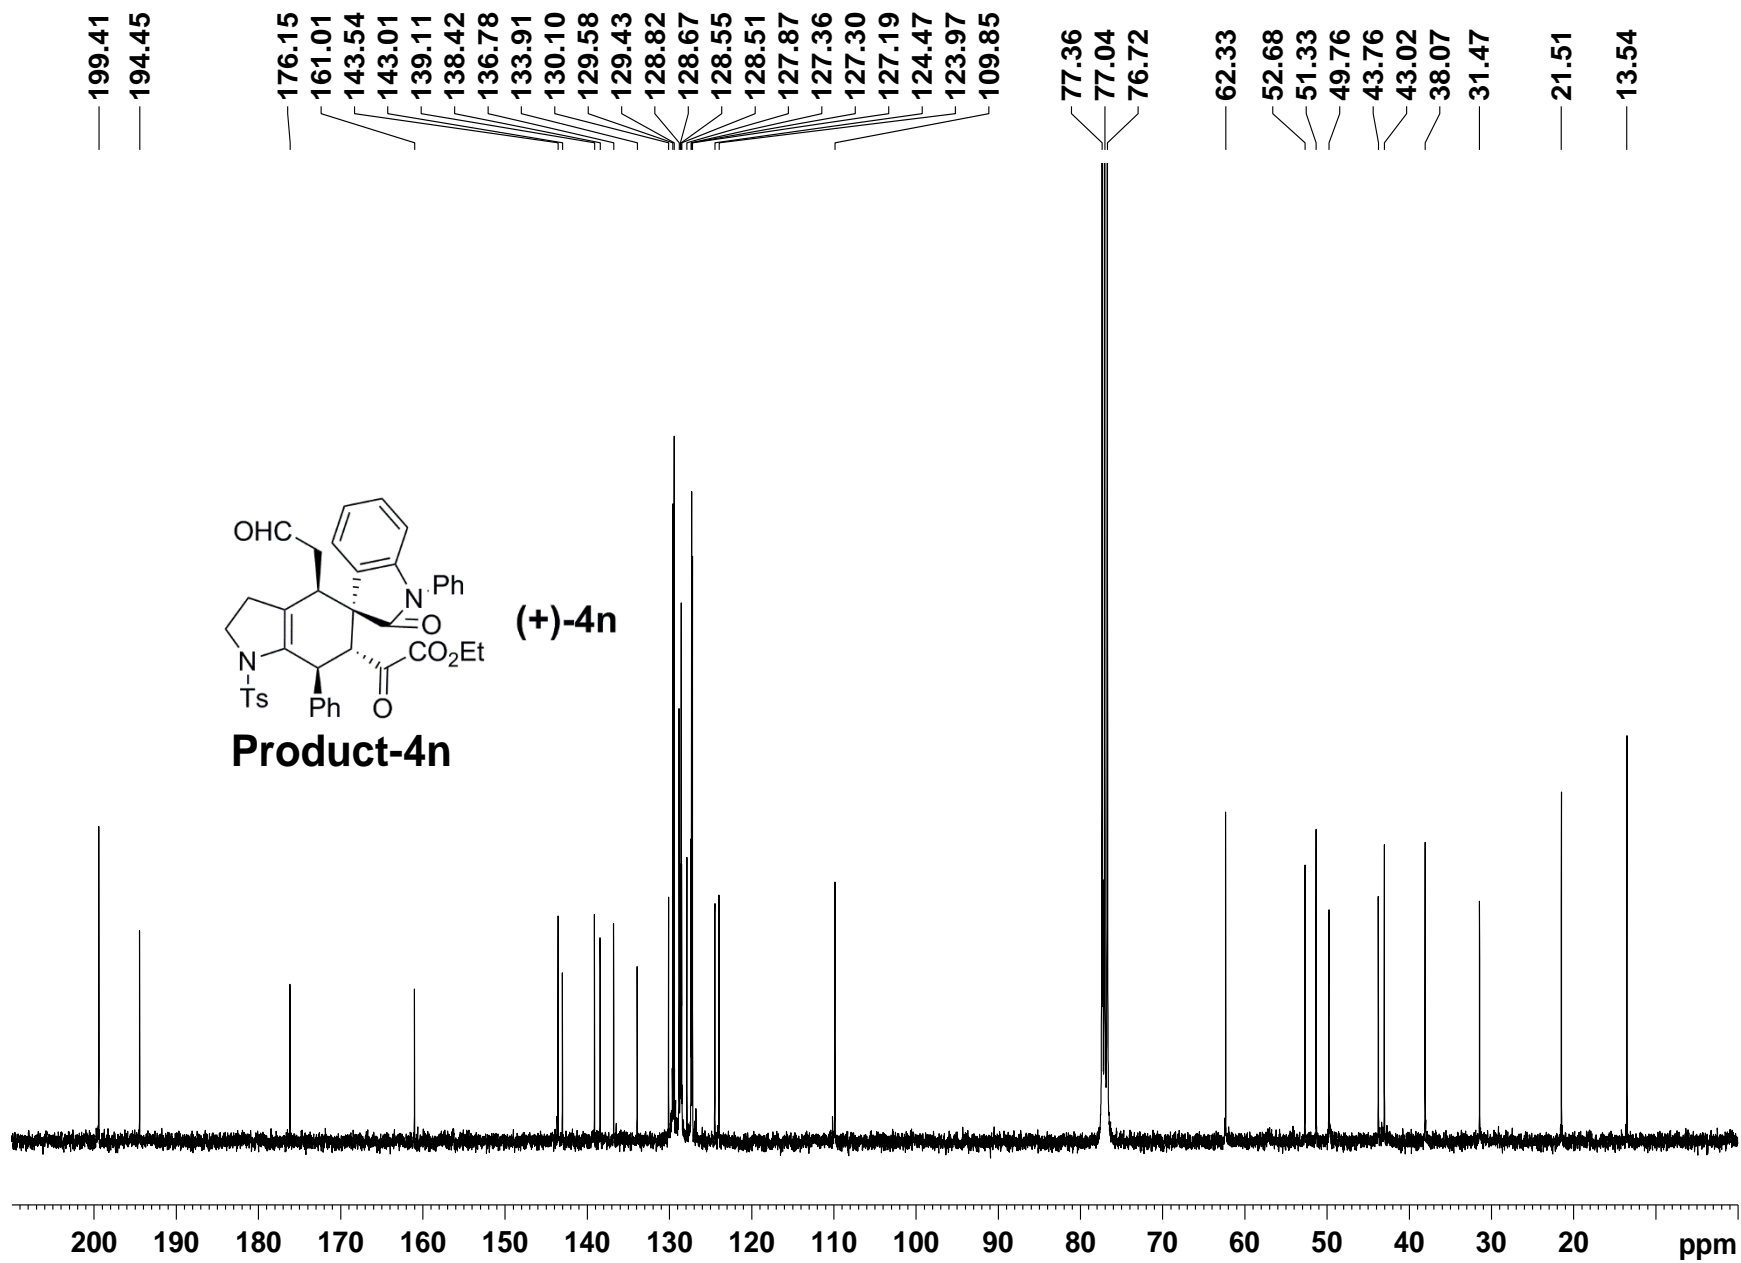

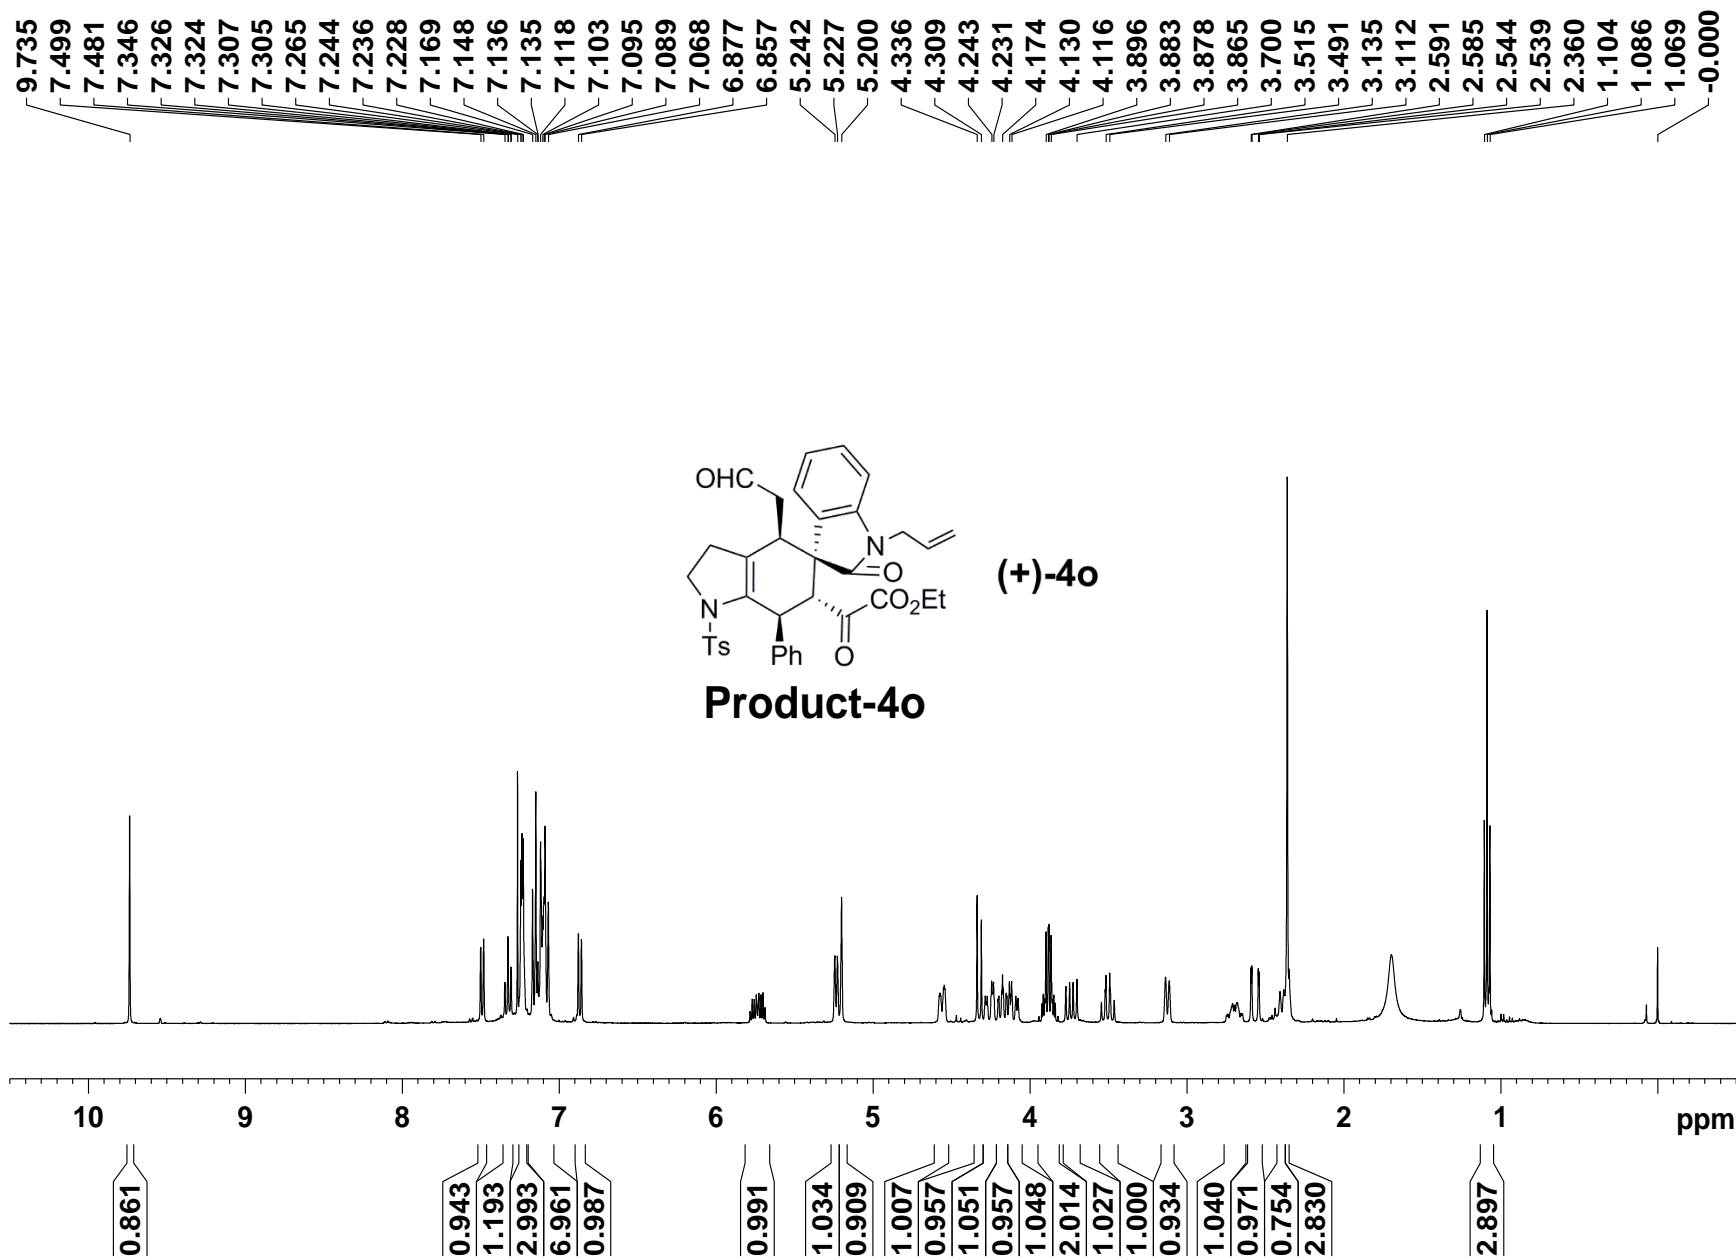

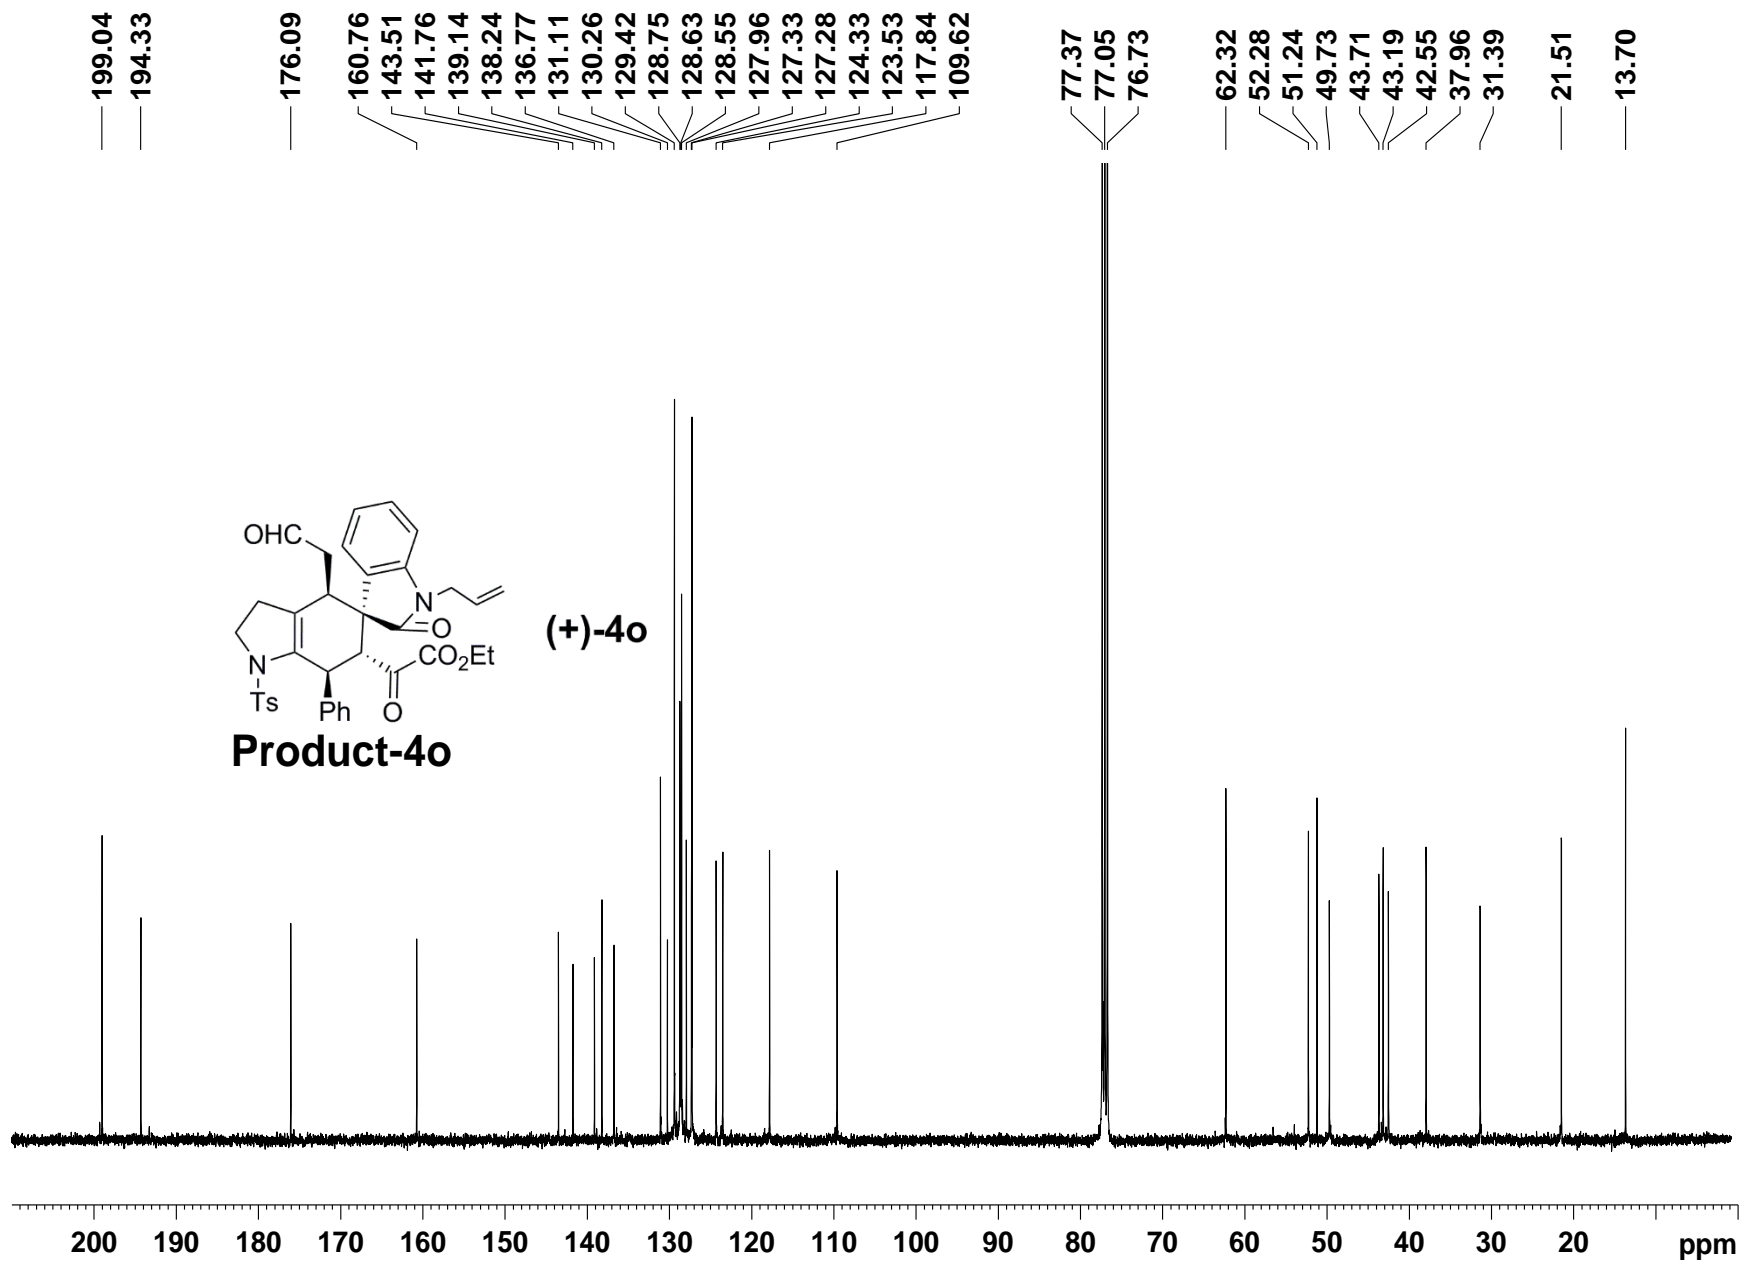

9.742  
7.509  
7.491  
7.409  
7.390  
7.370  
7.265  
7.244  
7.238  
7.229  
7.175  
7.158  
7.138  
7.118  
7.103  
7.098  
7.085  
7.065  
4.457  
4.451  
4.413  
4.407  
4.321  
4.294  
4.273  
4.267  
4.229  
4.223  
4.165  
3.888  
3.874  
3.870  
3.857  
3.853  
3.705  
3.682  
3.658  
3.481  
3.122  
3.099  
2.615  
2.609  
2.569  
2.563  
2.359  
2.262  
2.256  
2.250  
1.107  
1.089  
1.071

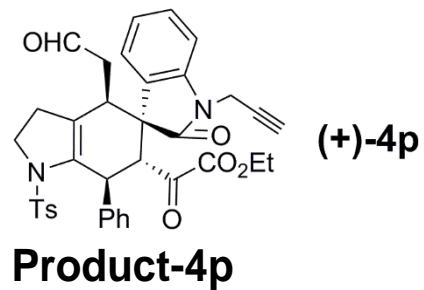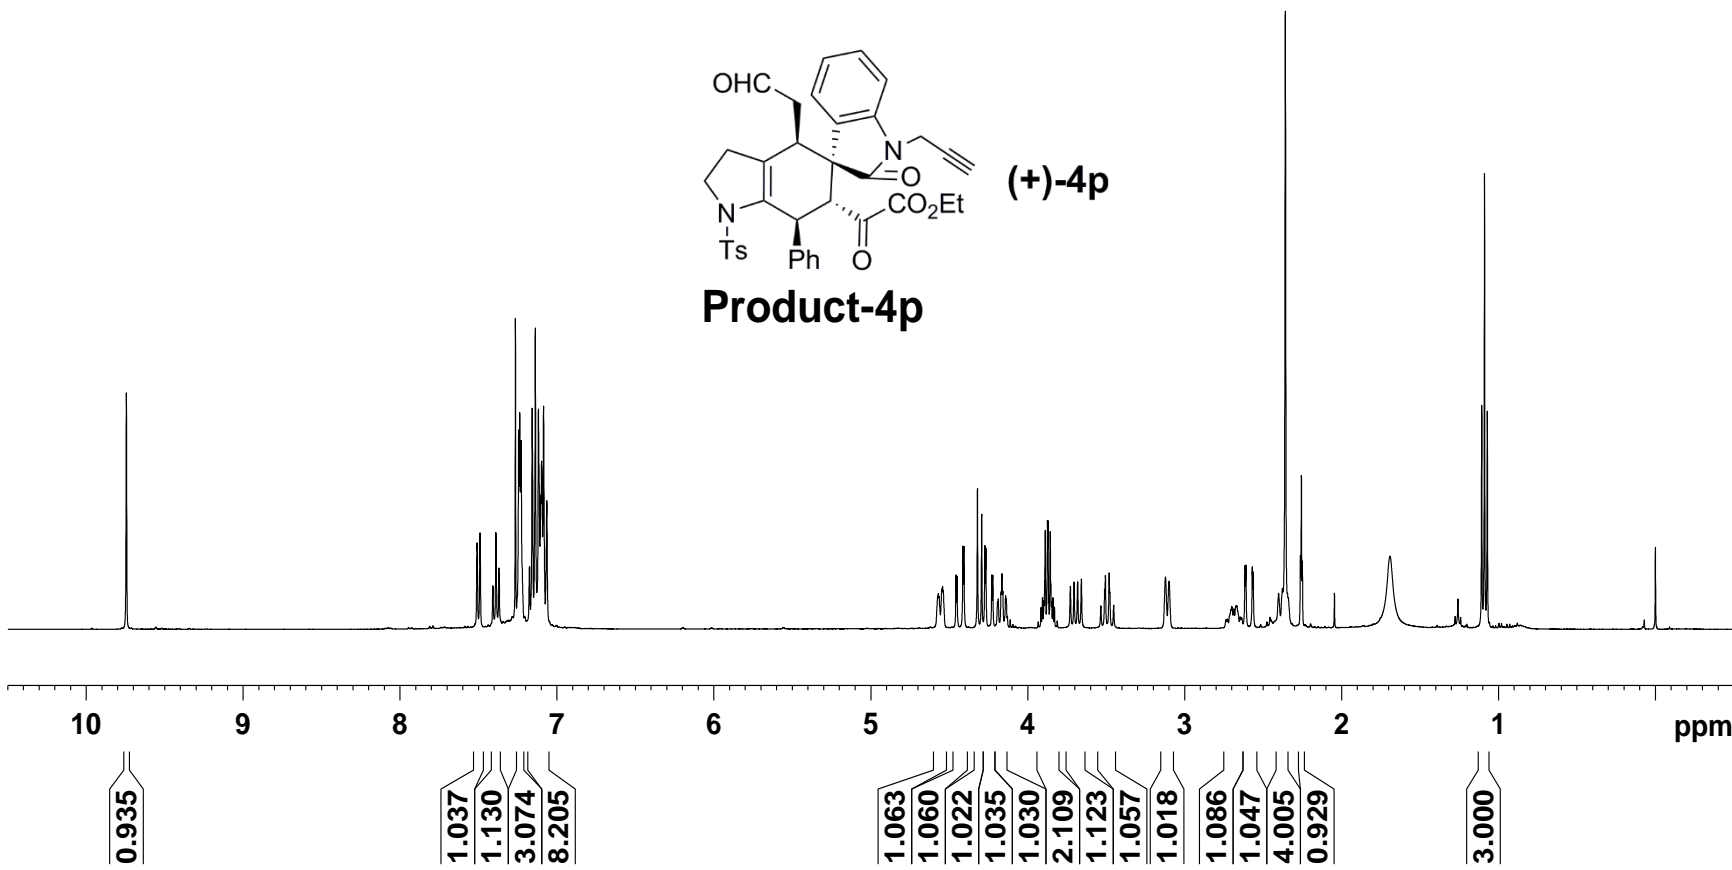



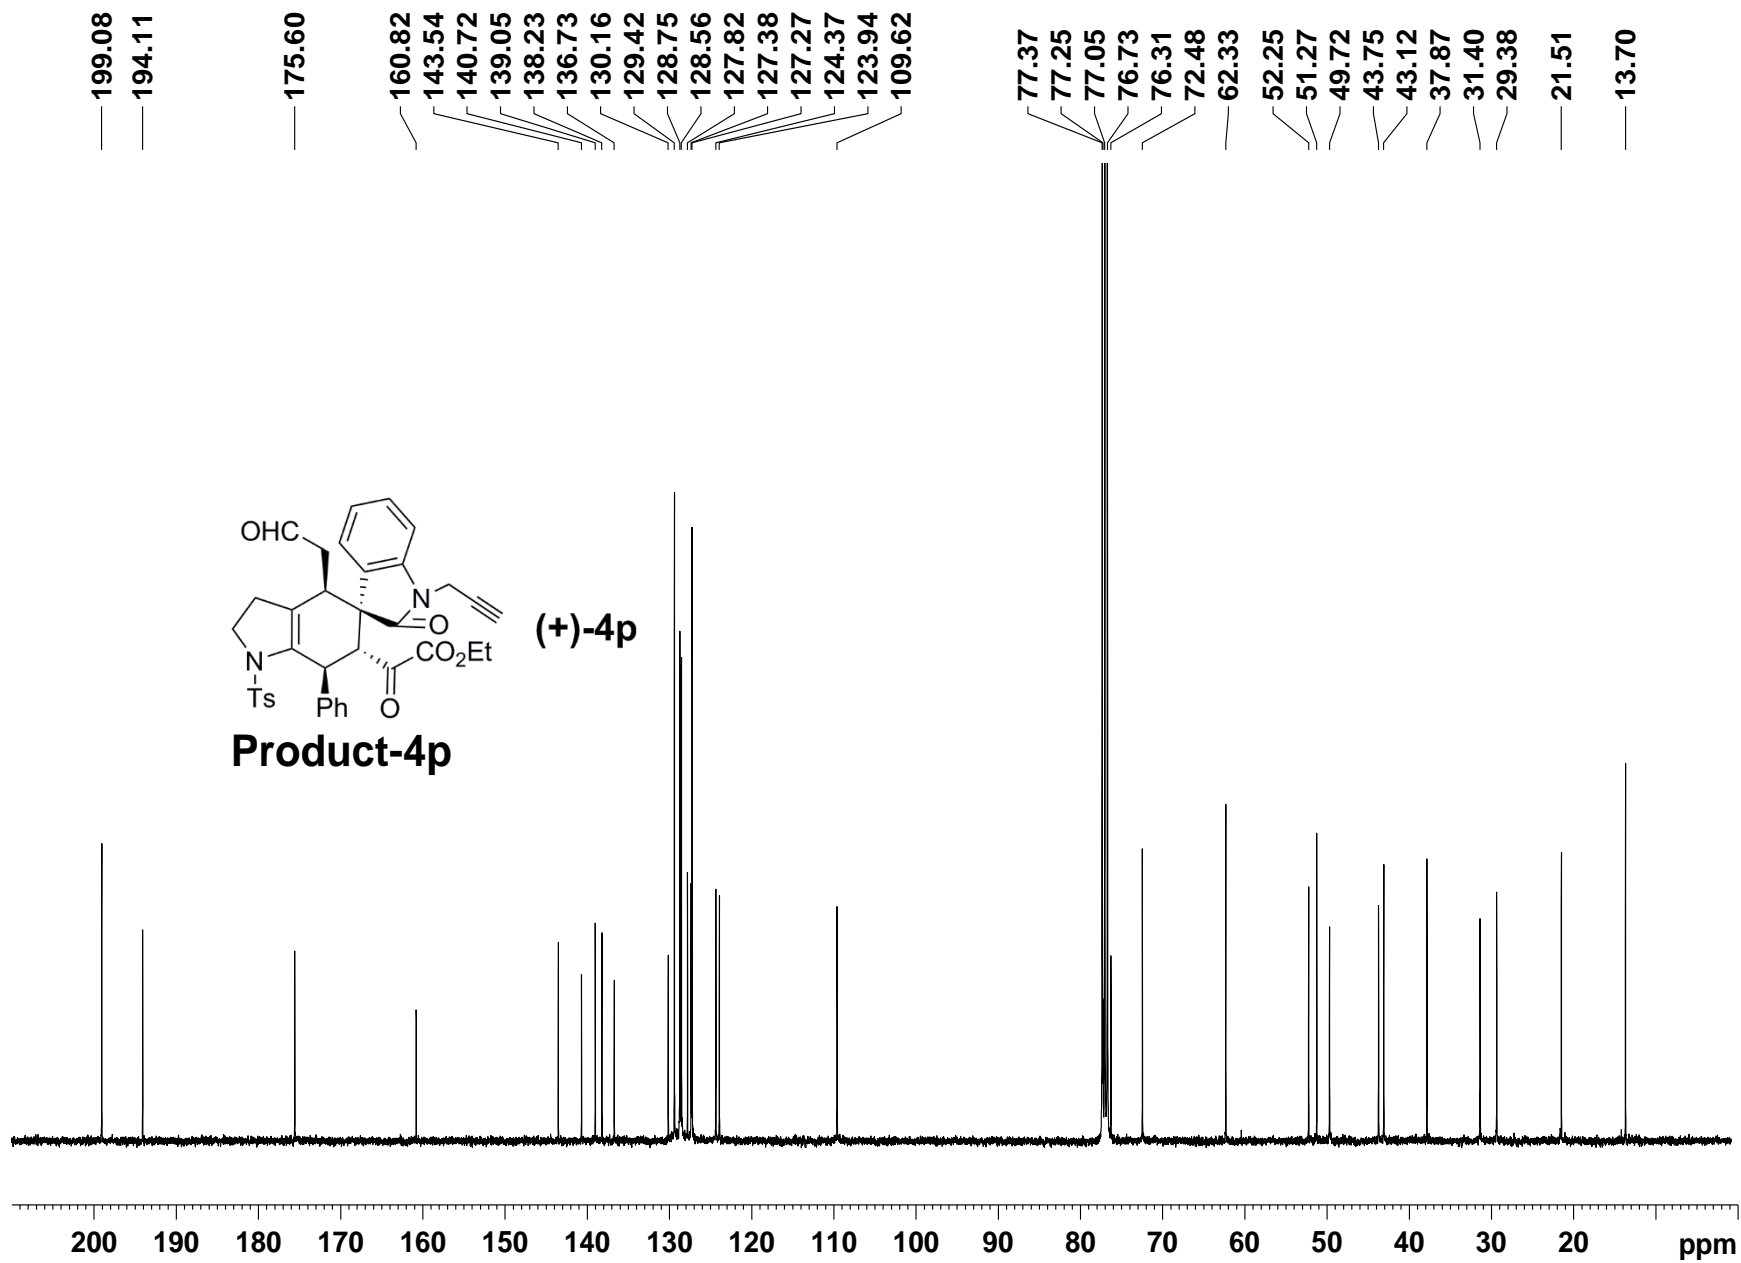

9.770  
7.509  
7.491  
7.323  
7.304  
7.262  
7.251  
7.246  
7.243  
7.235  
7.215  
7.196  
7.193  
7.170  
7.149  
7.130  
7.124  
7.119  
7.115  
7.110  
7.107  
7.088  
7.067  
6.669  
6.649  
4.939  
4.899  
4.653  
4.613  
4.385  
4.359  
4.184  
3.890  
3.878  
3.872  
3.861  
3.754  
3.528  
3.504  
3.214  
3.190  
2.630  
2.625  
2.584  
2.578  
2.357  
1.664  
1.077  
1.059  
1.041  
-0.000

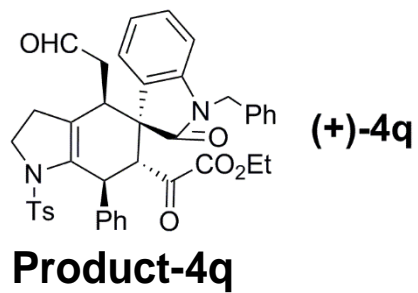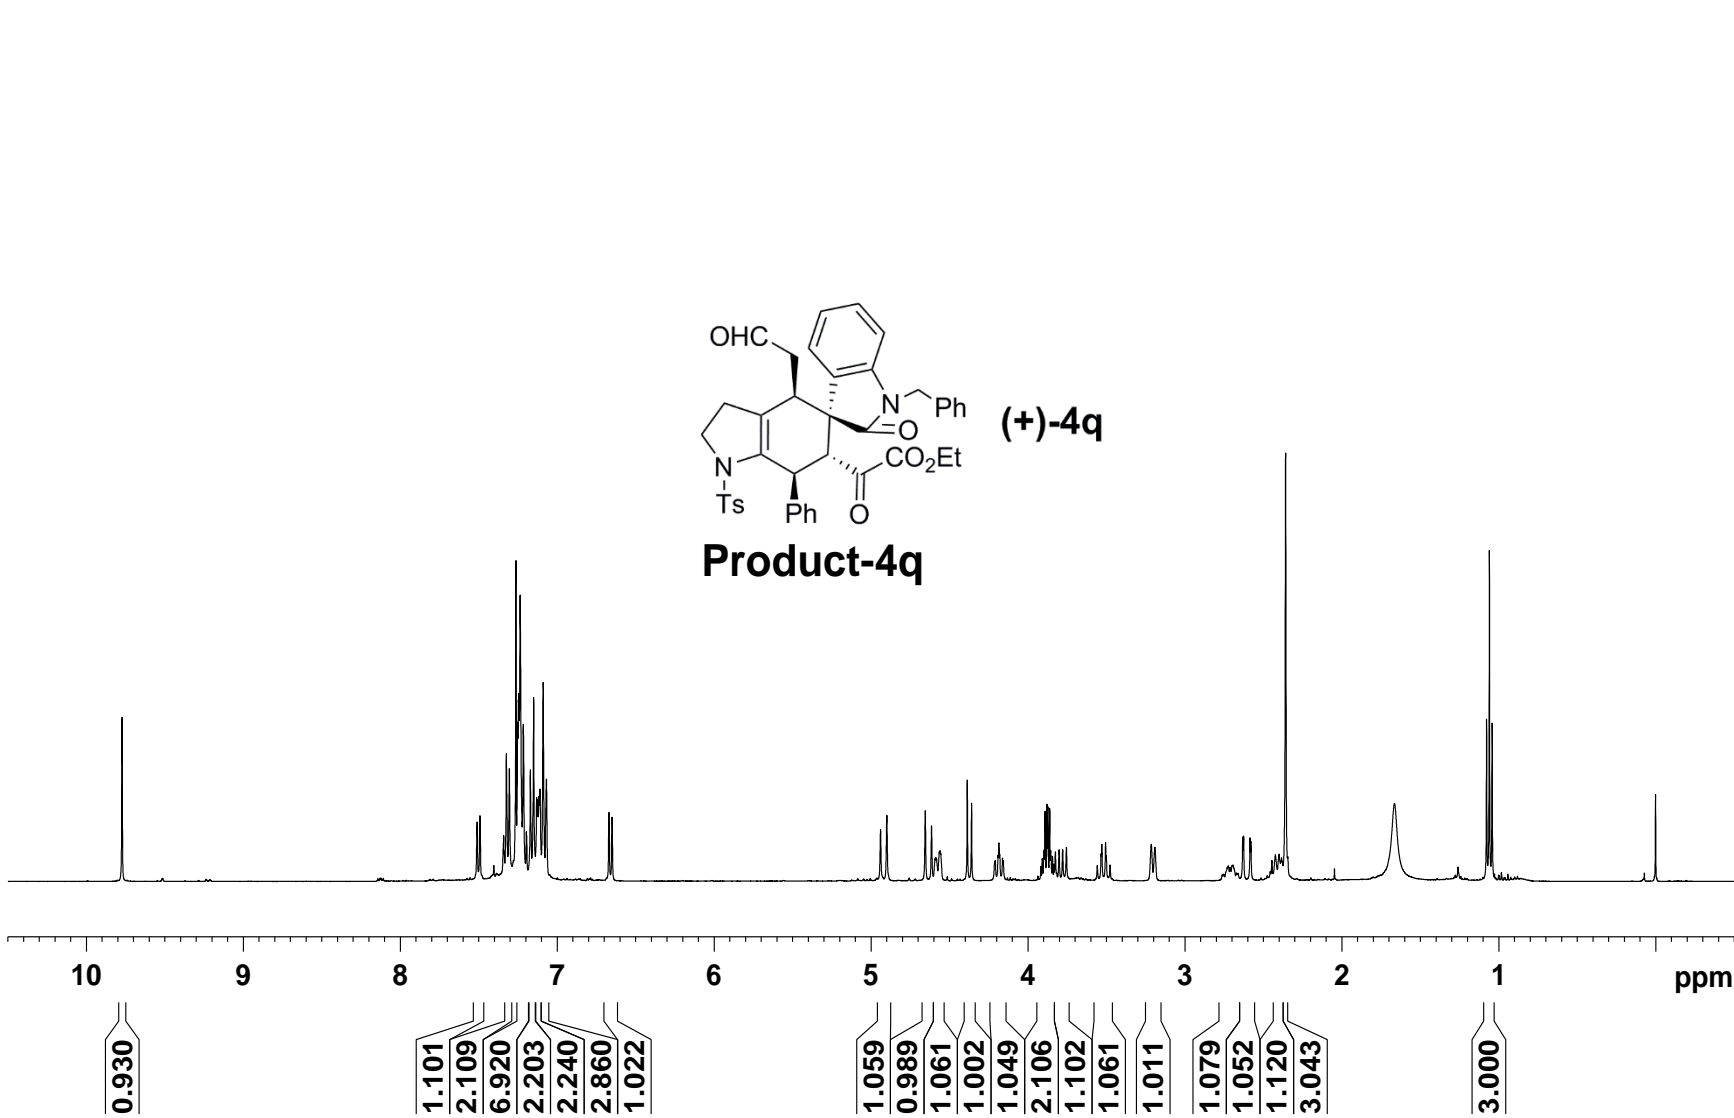

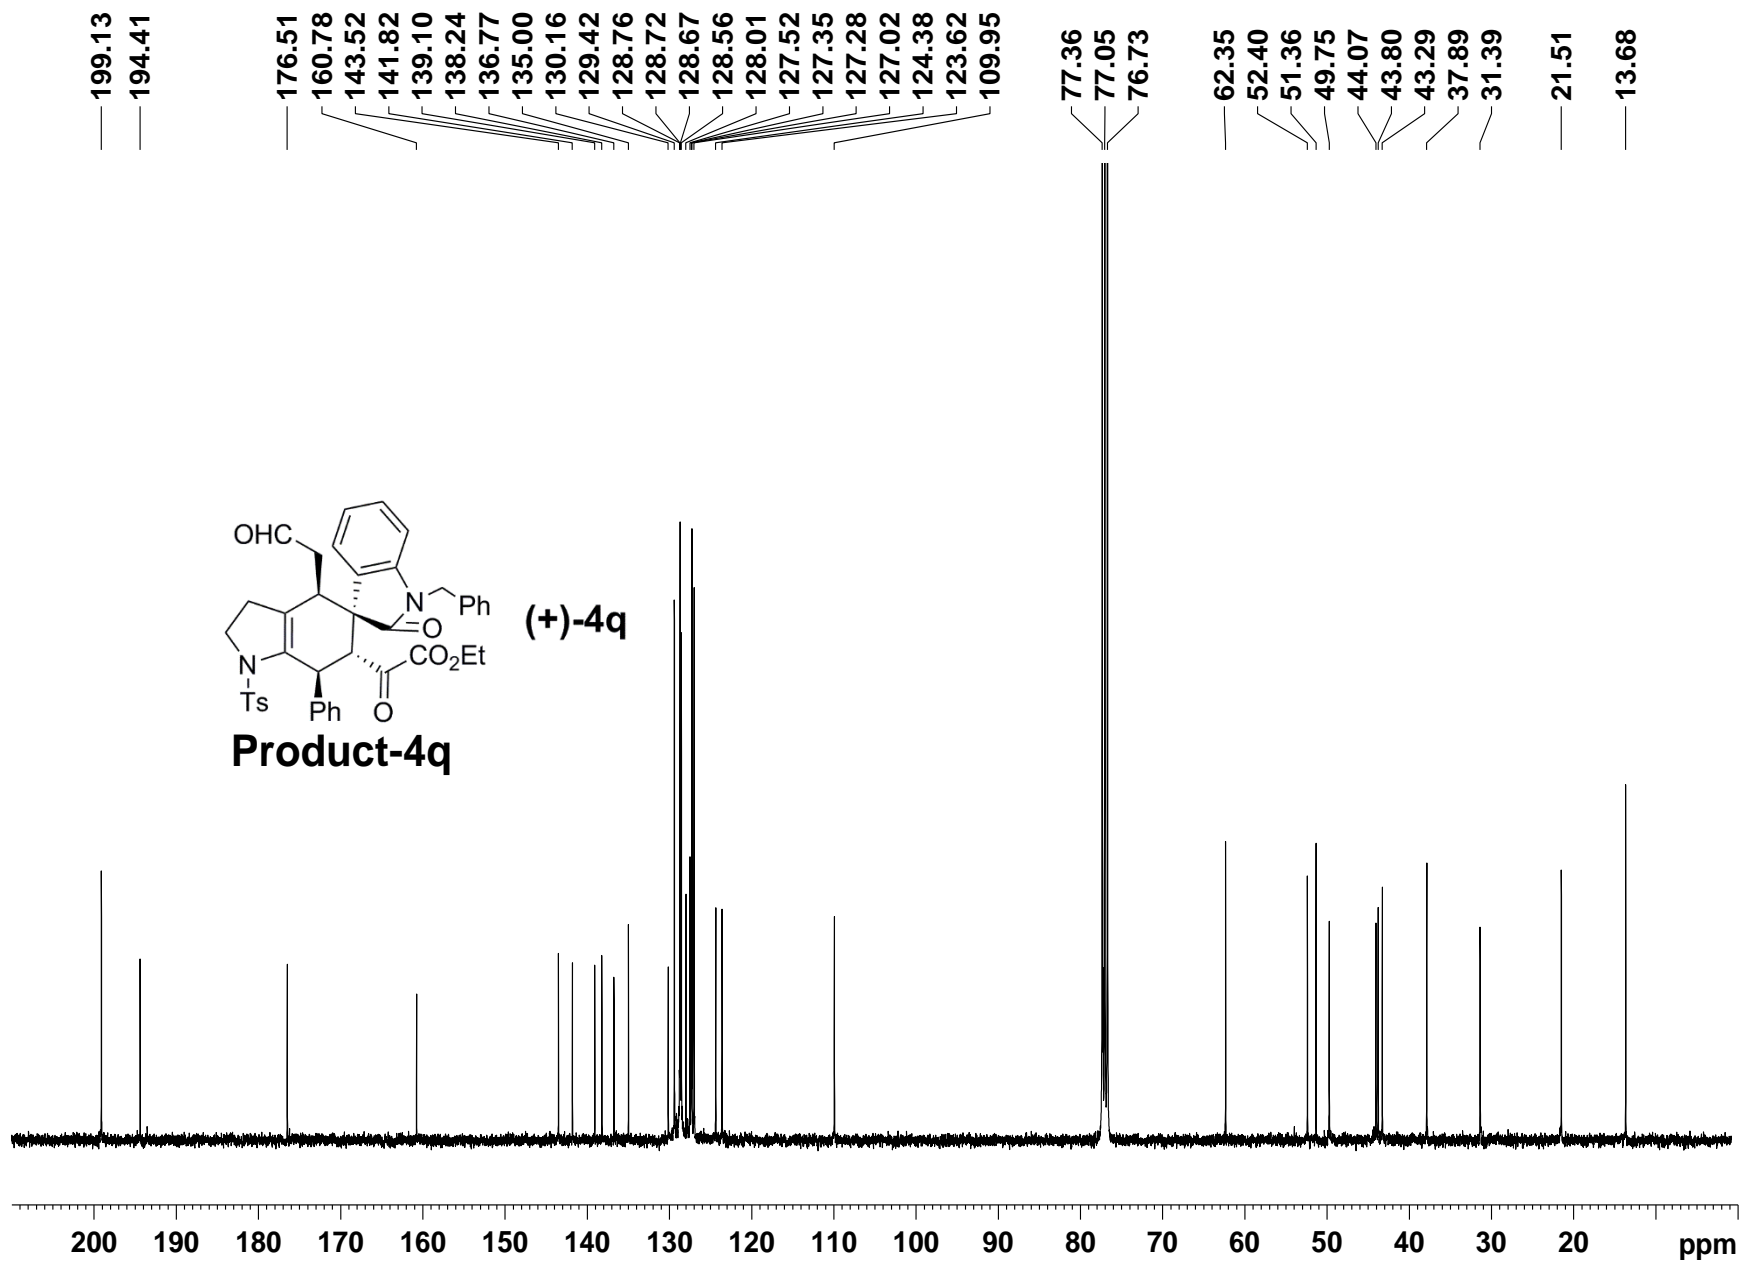

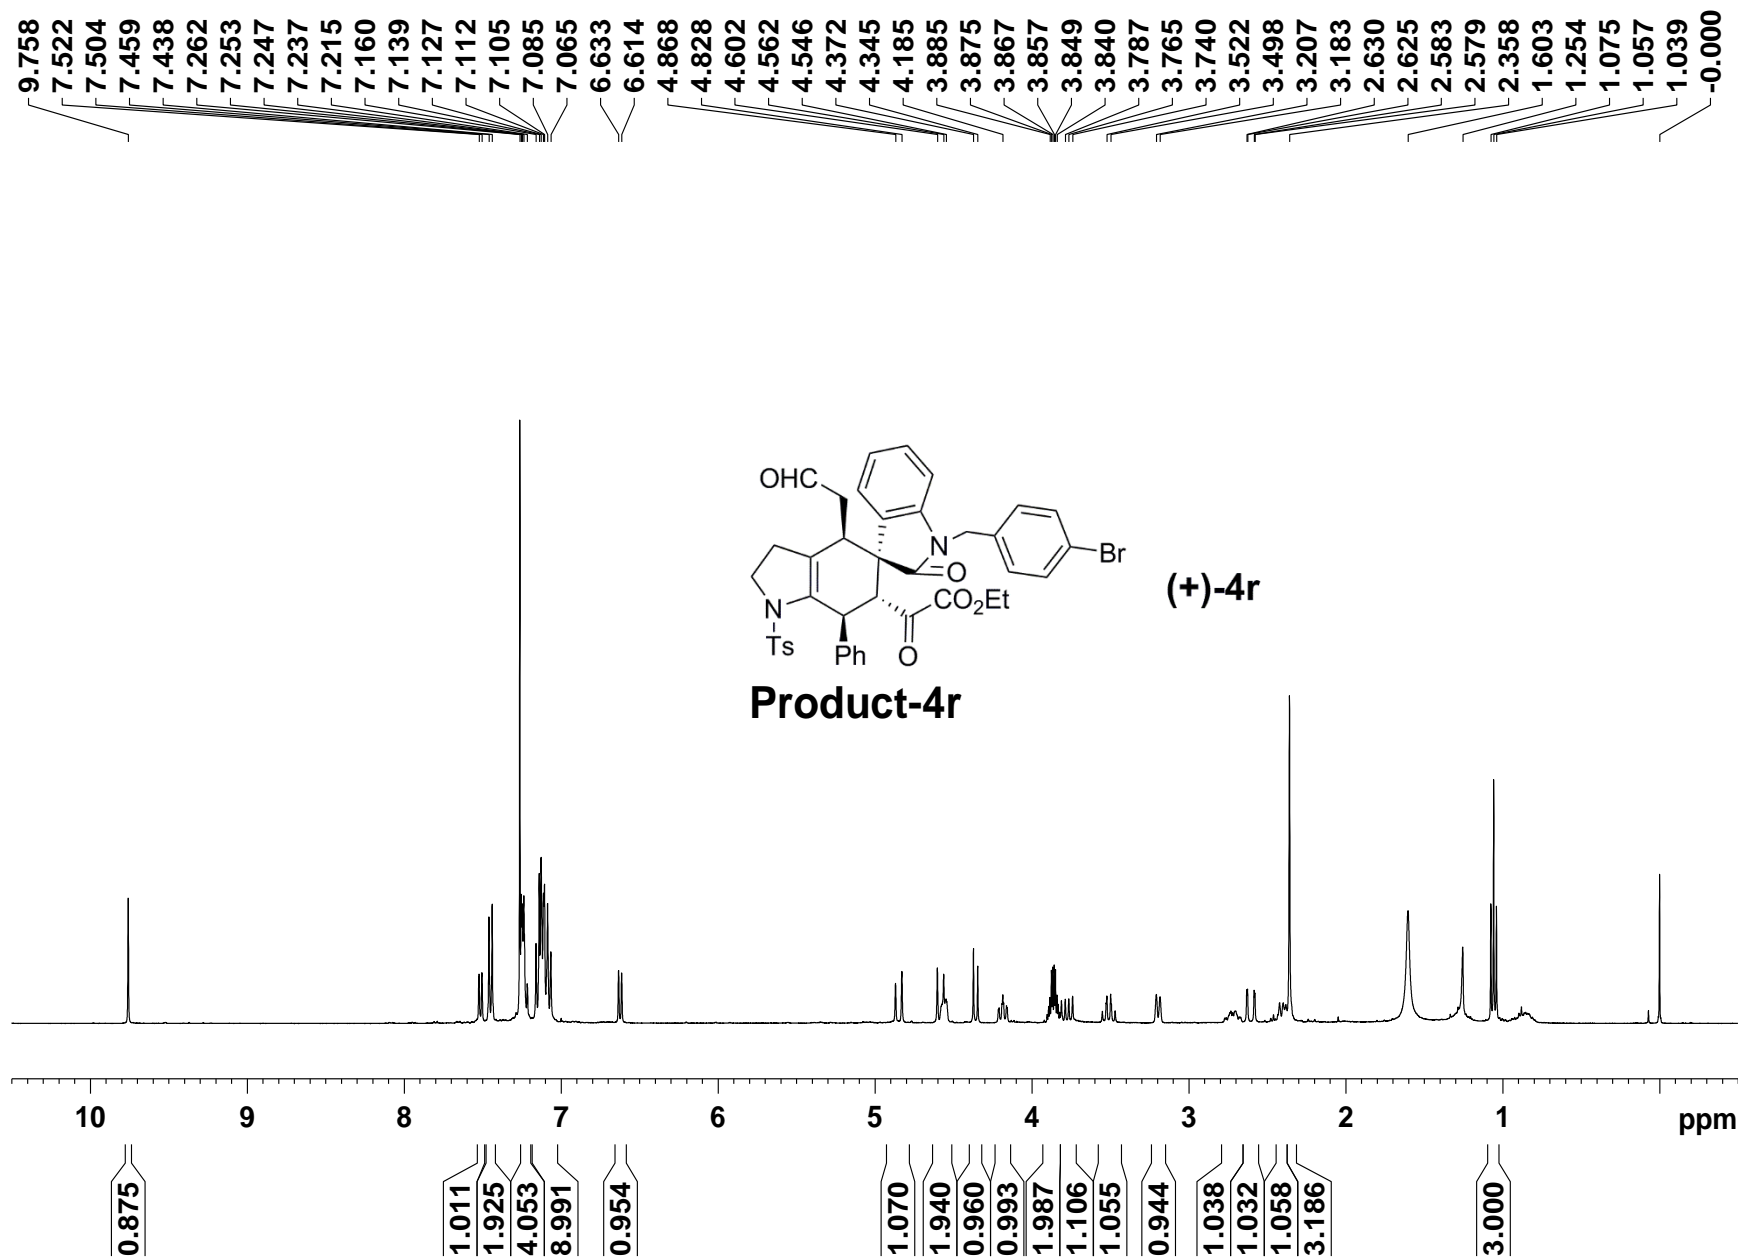

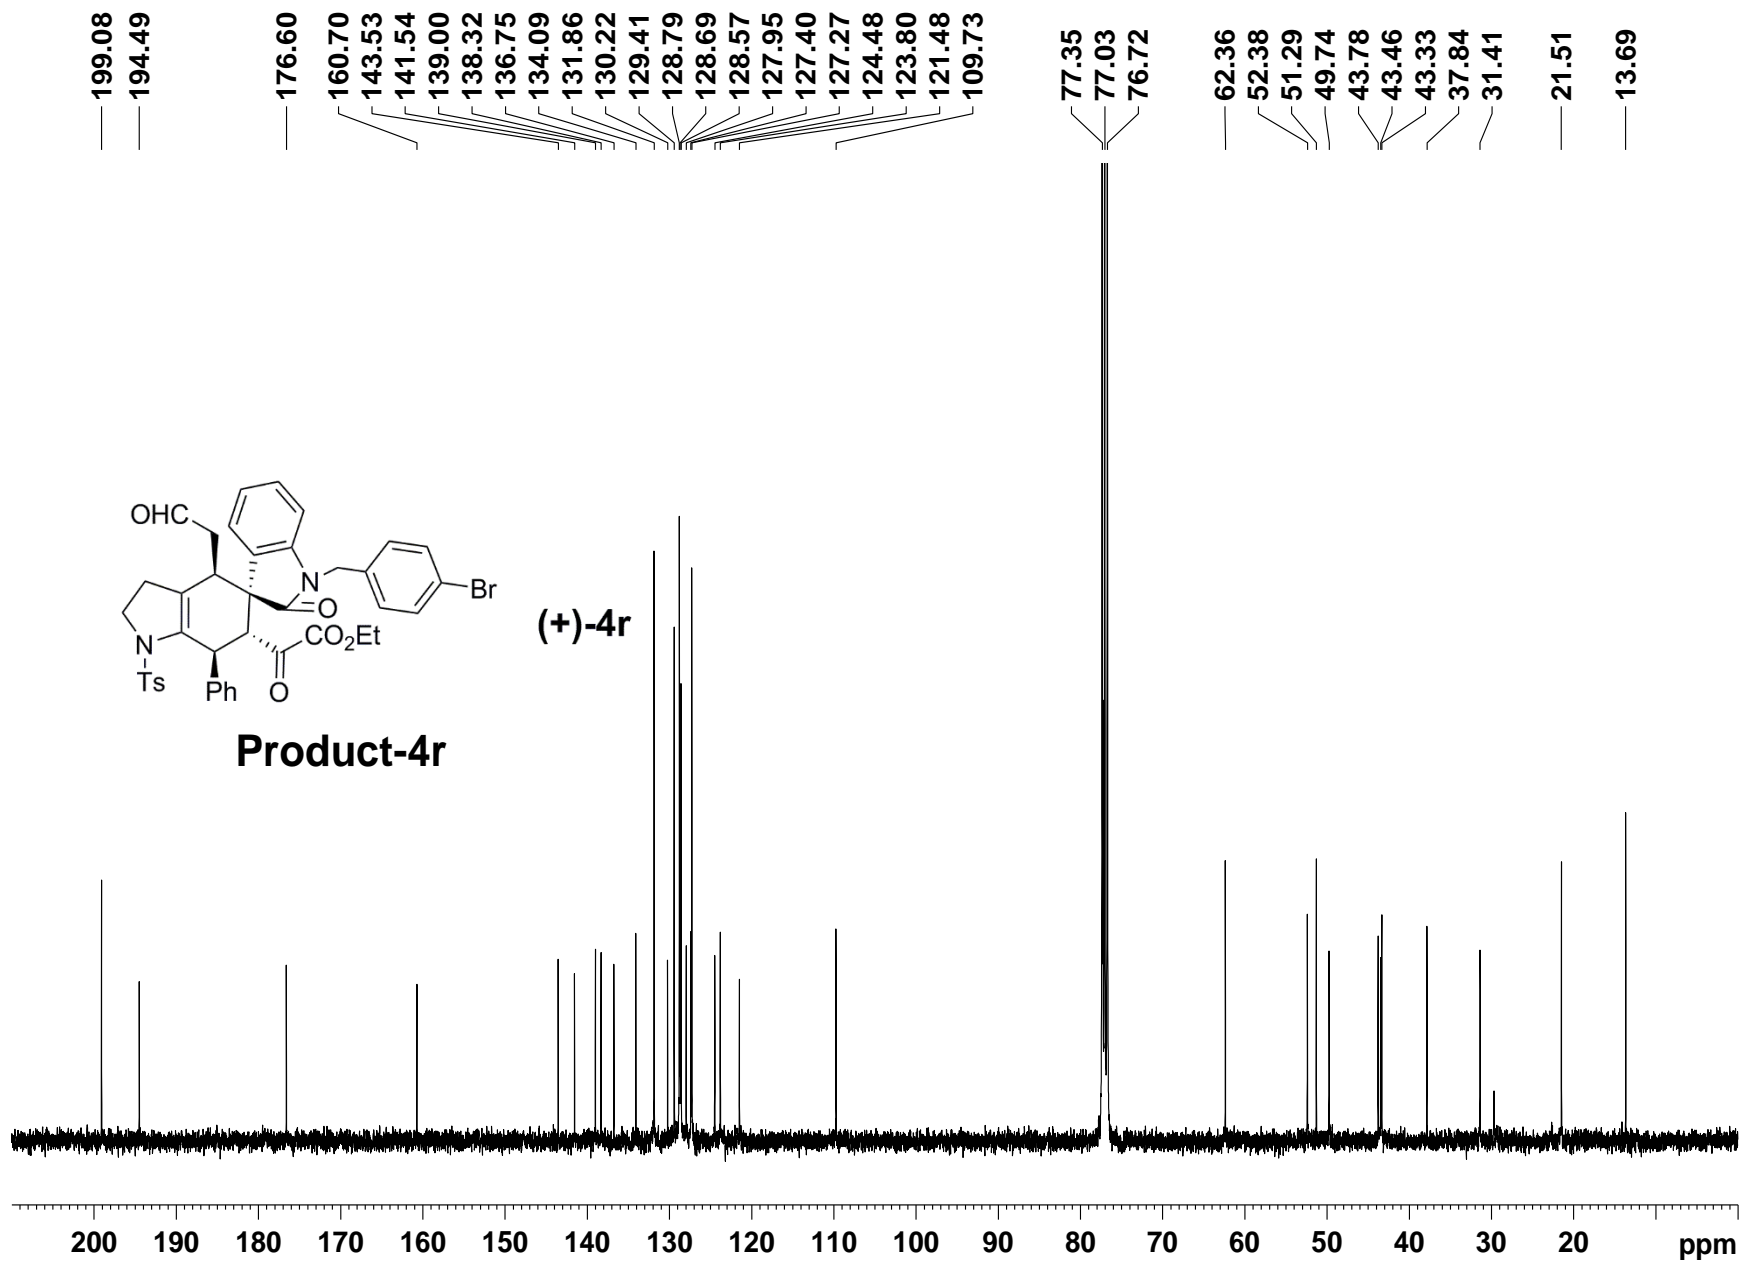

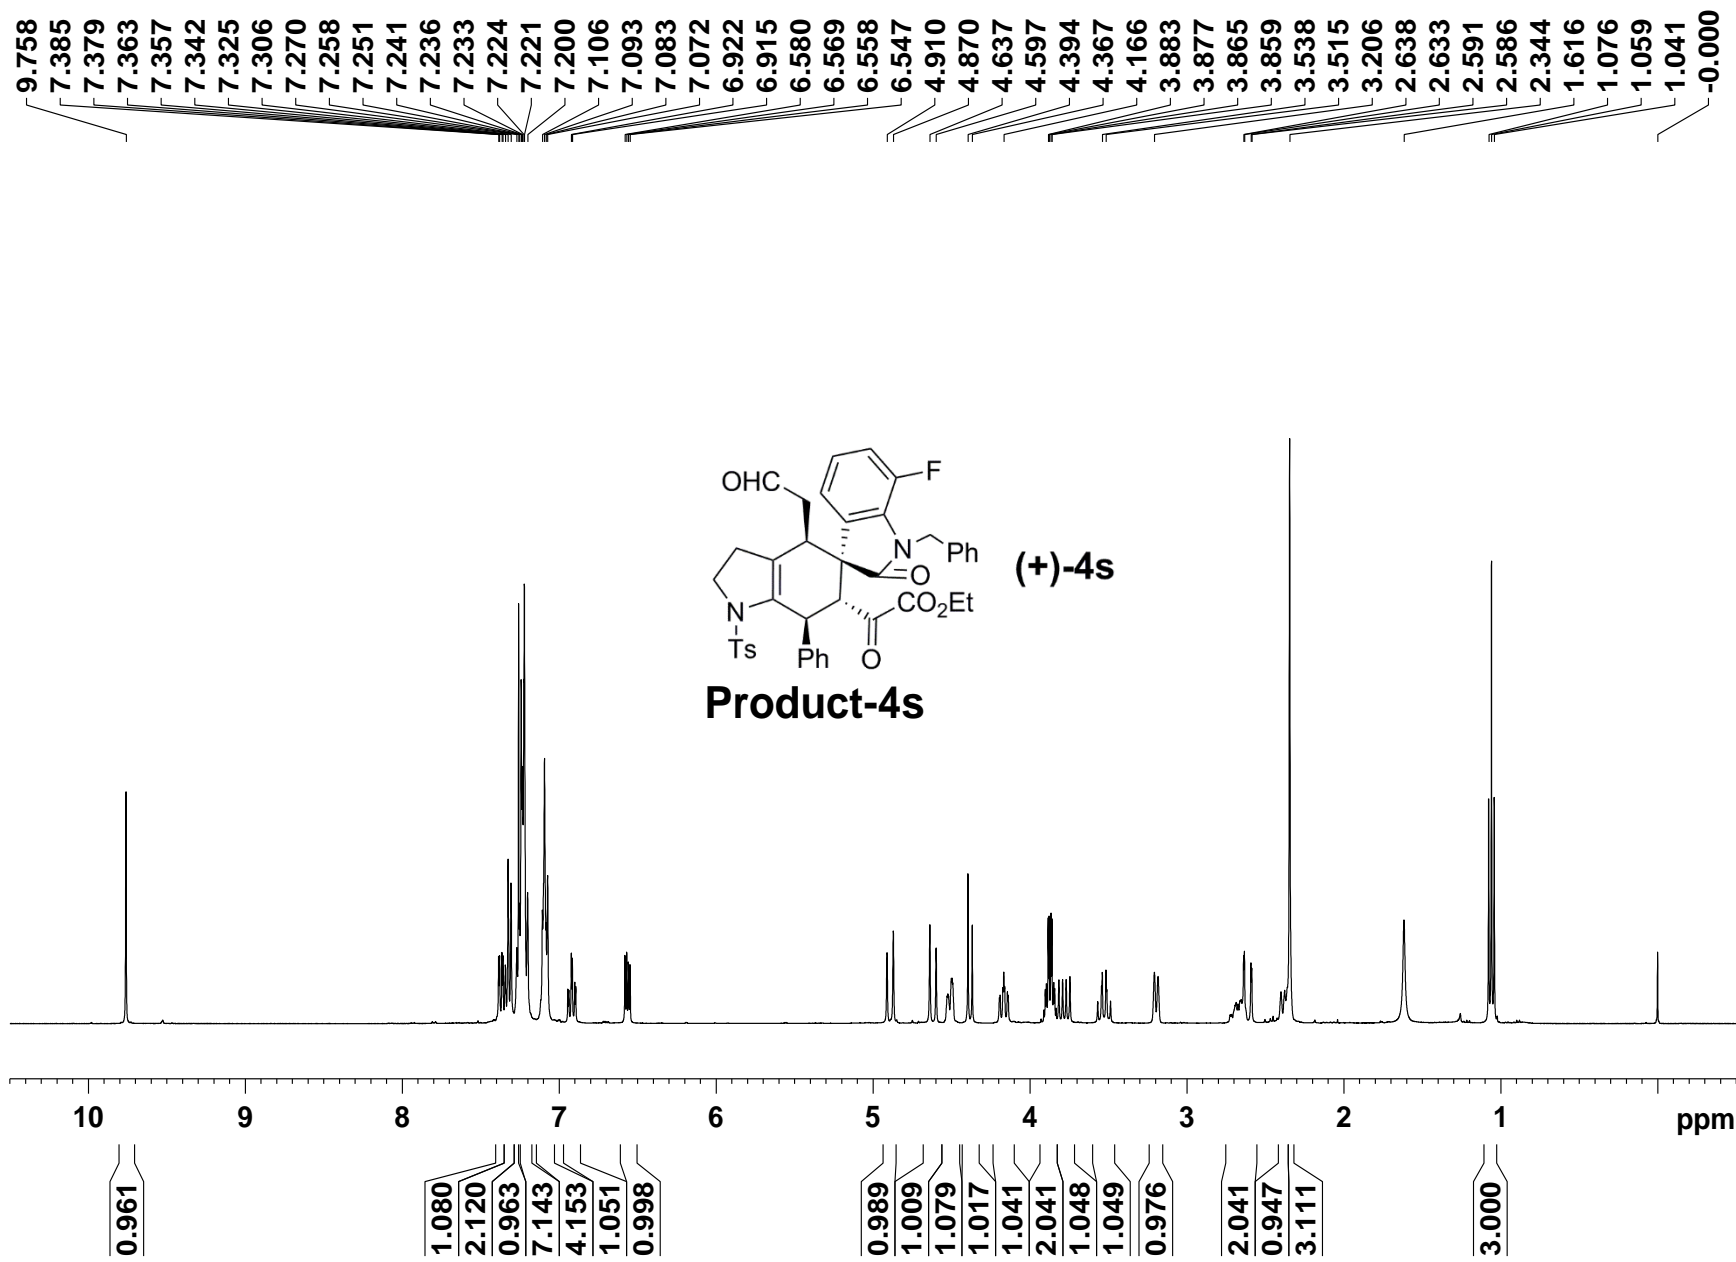

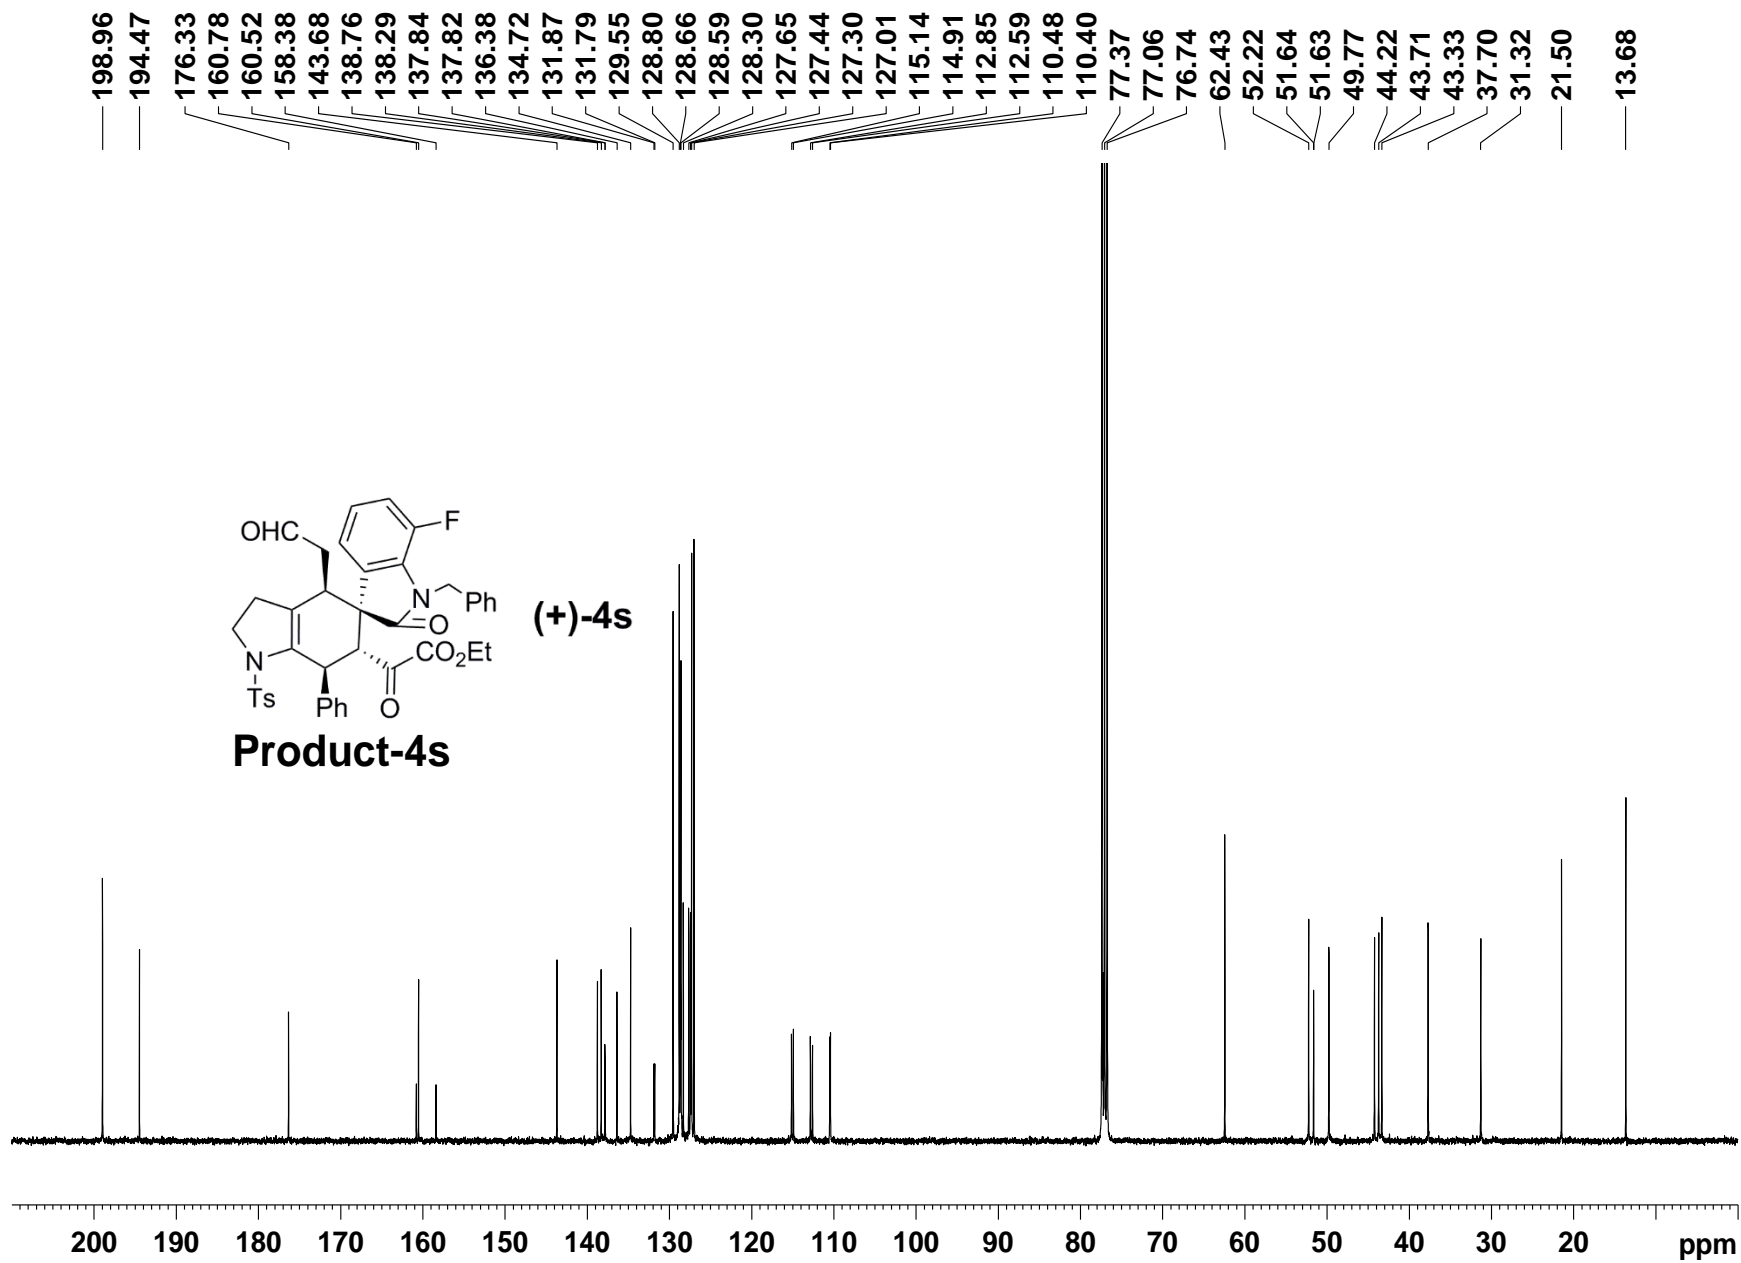

9.742  
7.453  
7.434  
7.390  
7.371  
7.352  
7.265  
7.235  
7.214  
7.156  
7.140  
7.135  
7.121  
7.102  
7.004  
6.983  
6.886  
6.867  
4.530  
4.525  
4.253  
4.230  
4.222  
4.195  
3.985  
3.967  
3.952  
3.934  
3.727  
3.703  
3.680  
3.657  
3.591  
3.587  
3.563  
3.127  
3.107  
3.083  
3.065  
2.586  
2.580  
2.540  
2.534  
2.427  
2.399  
2.387  
1.656  
1.146  
1.128  
1.111  
-0.000

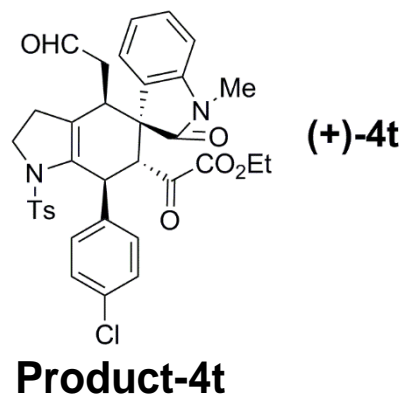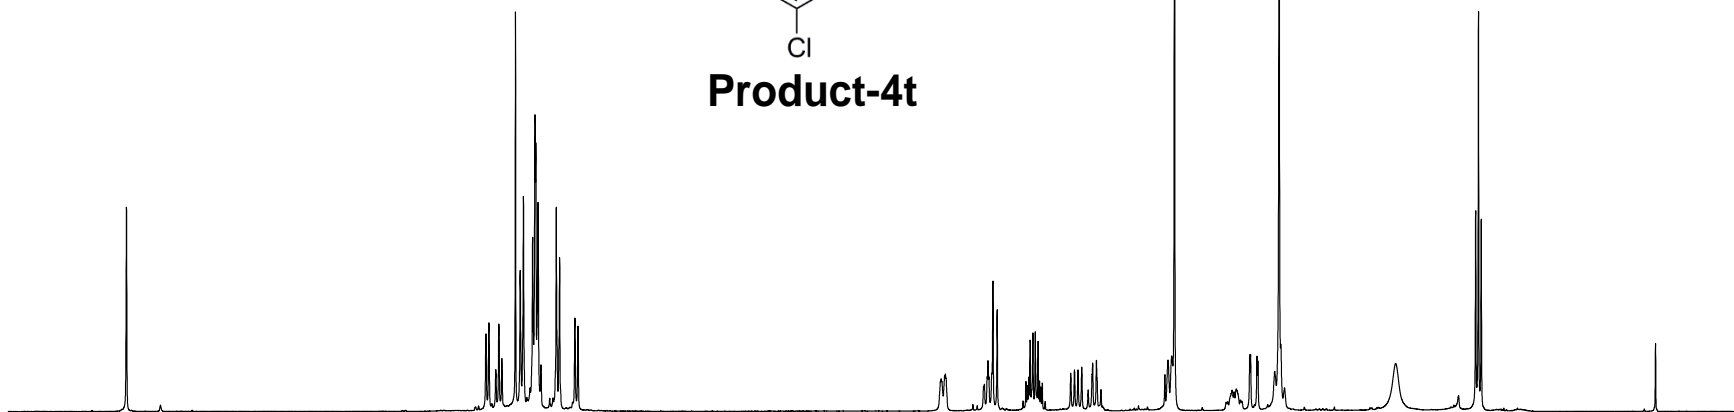

10

9

8

7

6

5

4

3

2

1

ppm

0.896

0.951

1.079

1.947

4.967

1.854

1.000

1.021

1.910

2.079

1.027

1.031

1.085

2.737

1.069

0.998

4.170

3.000



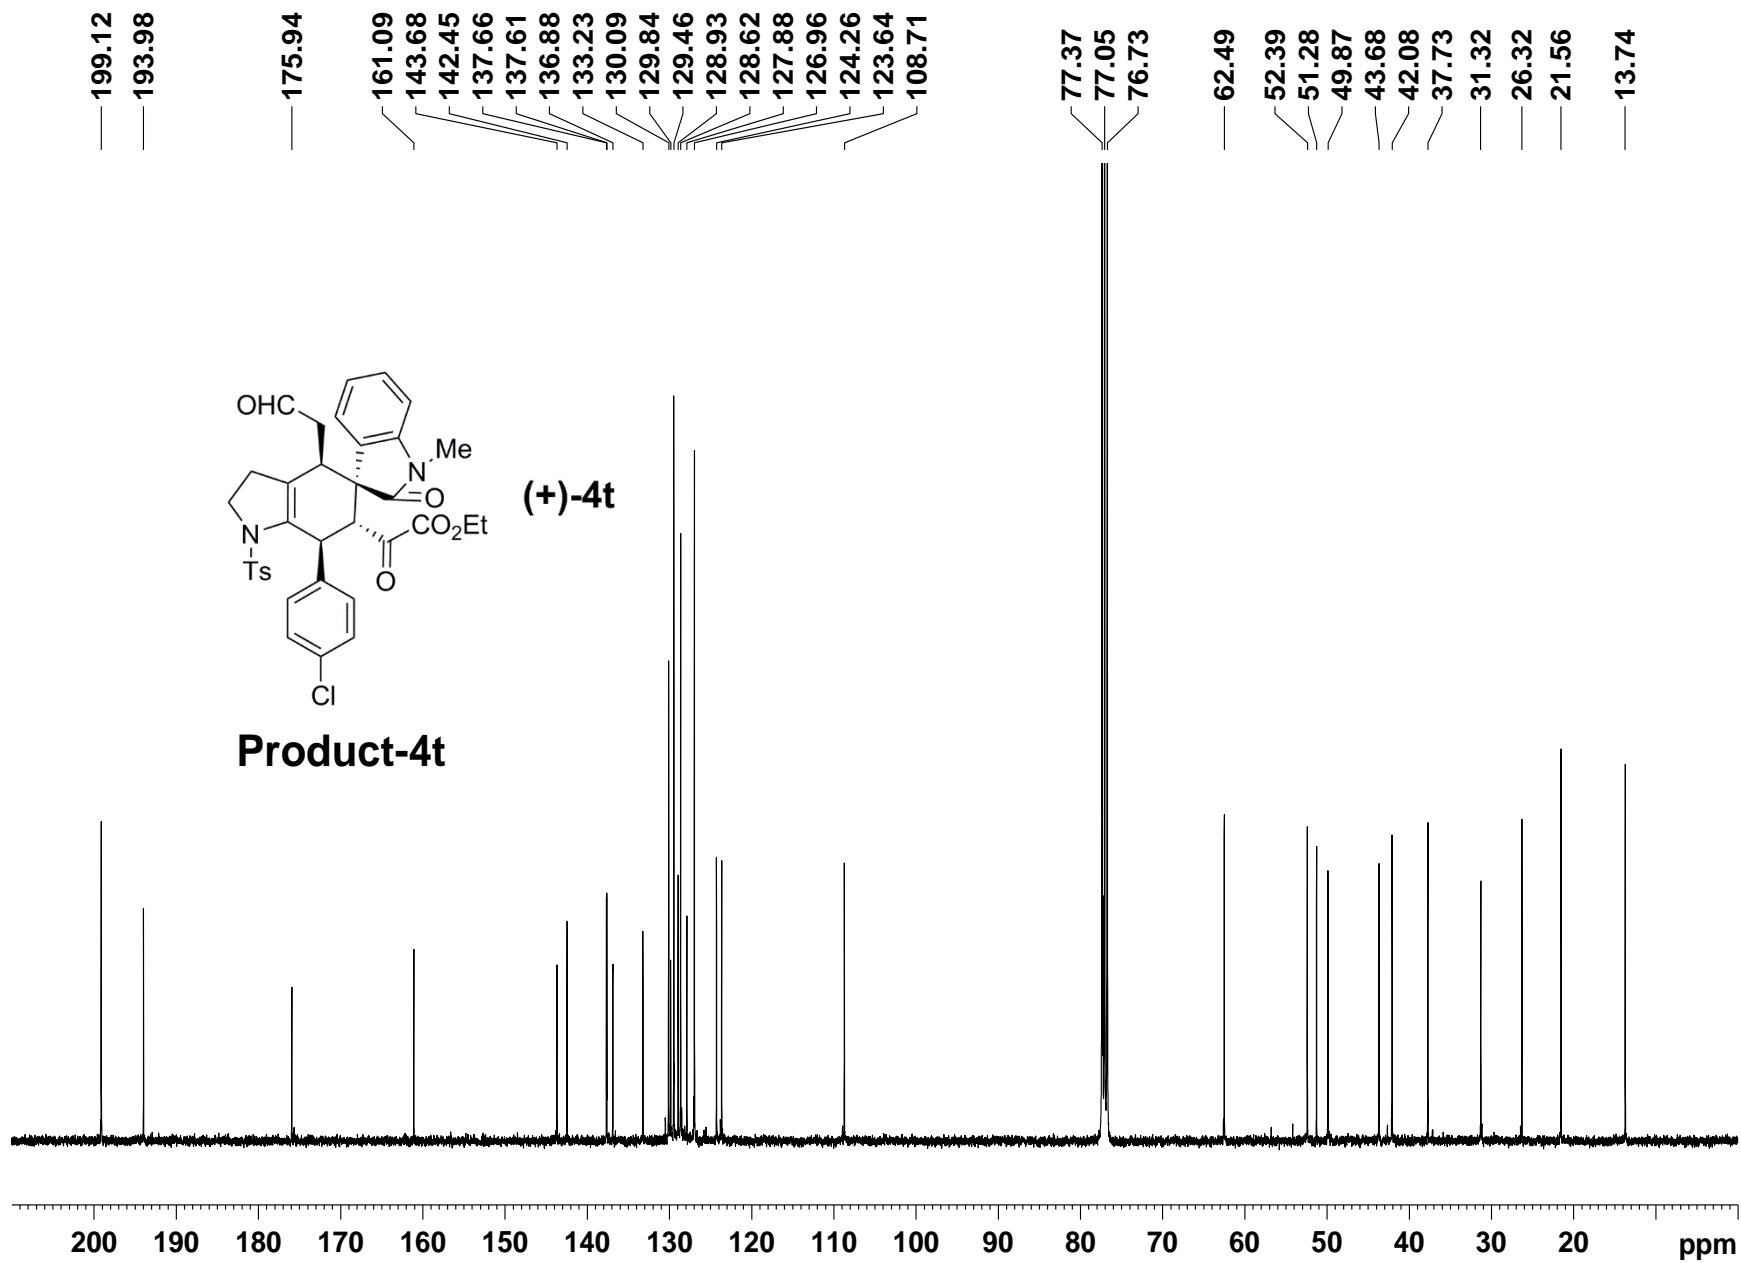

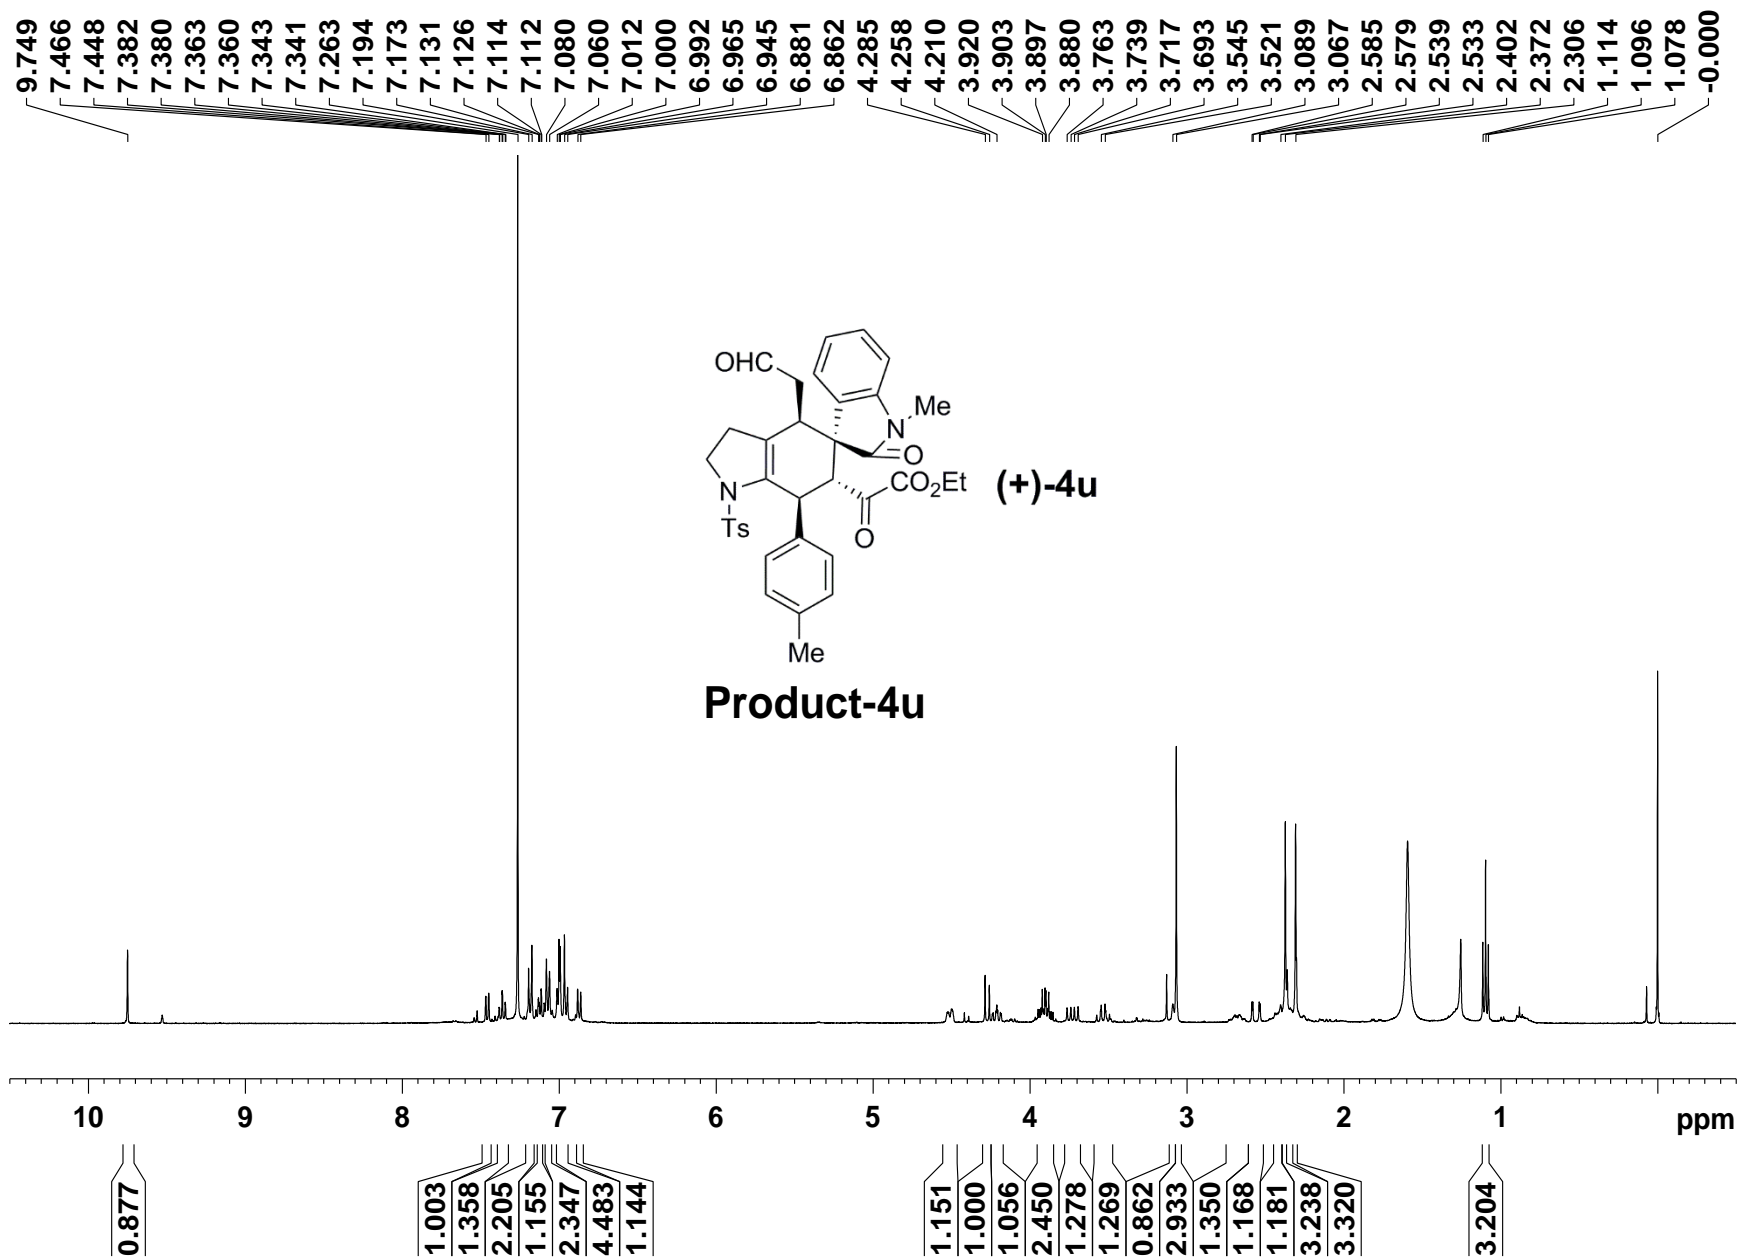

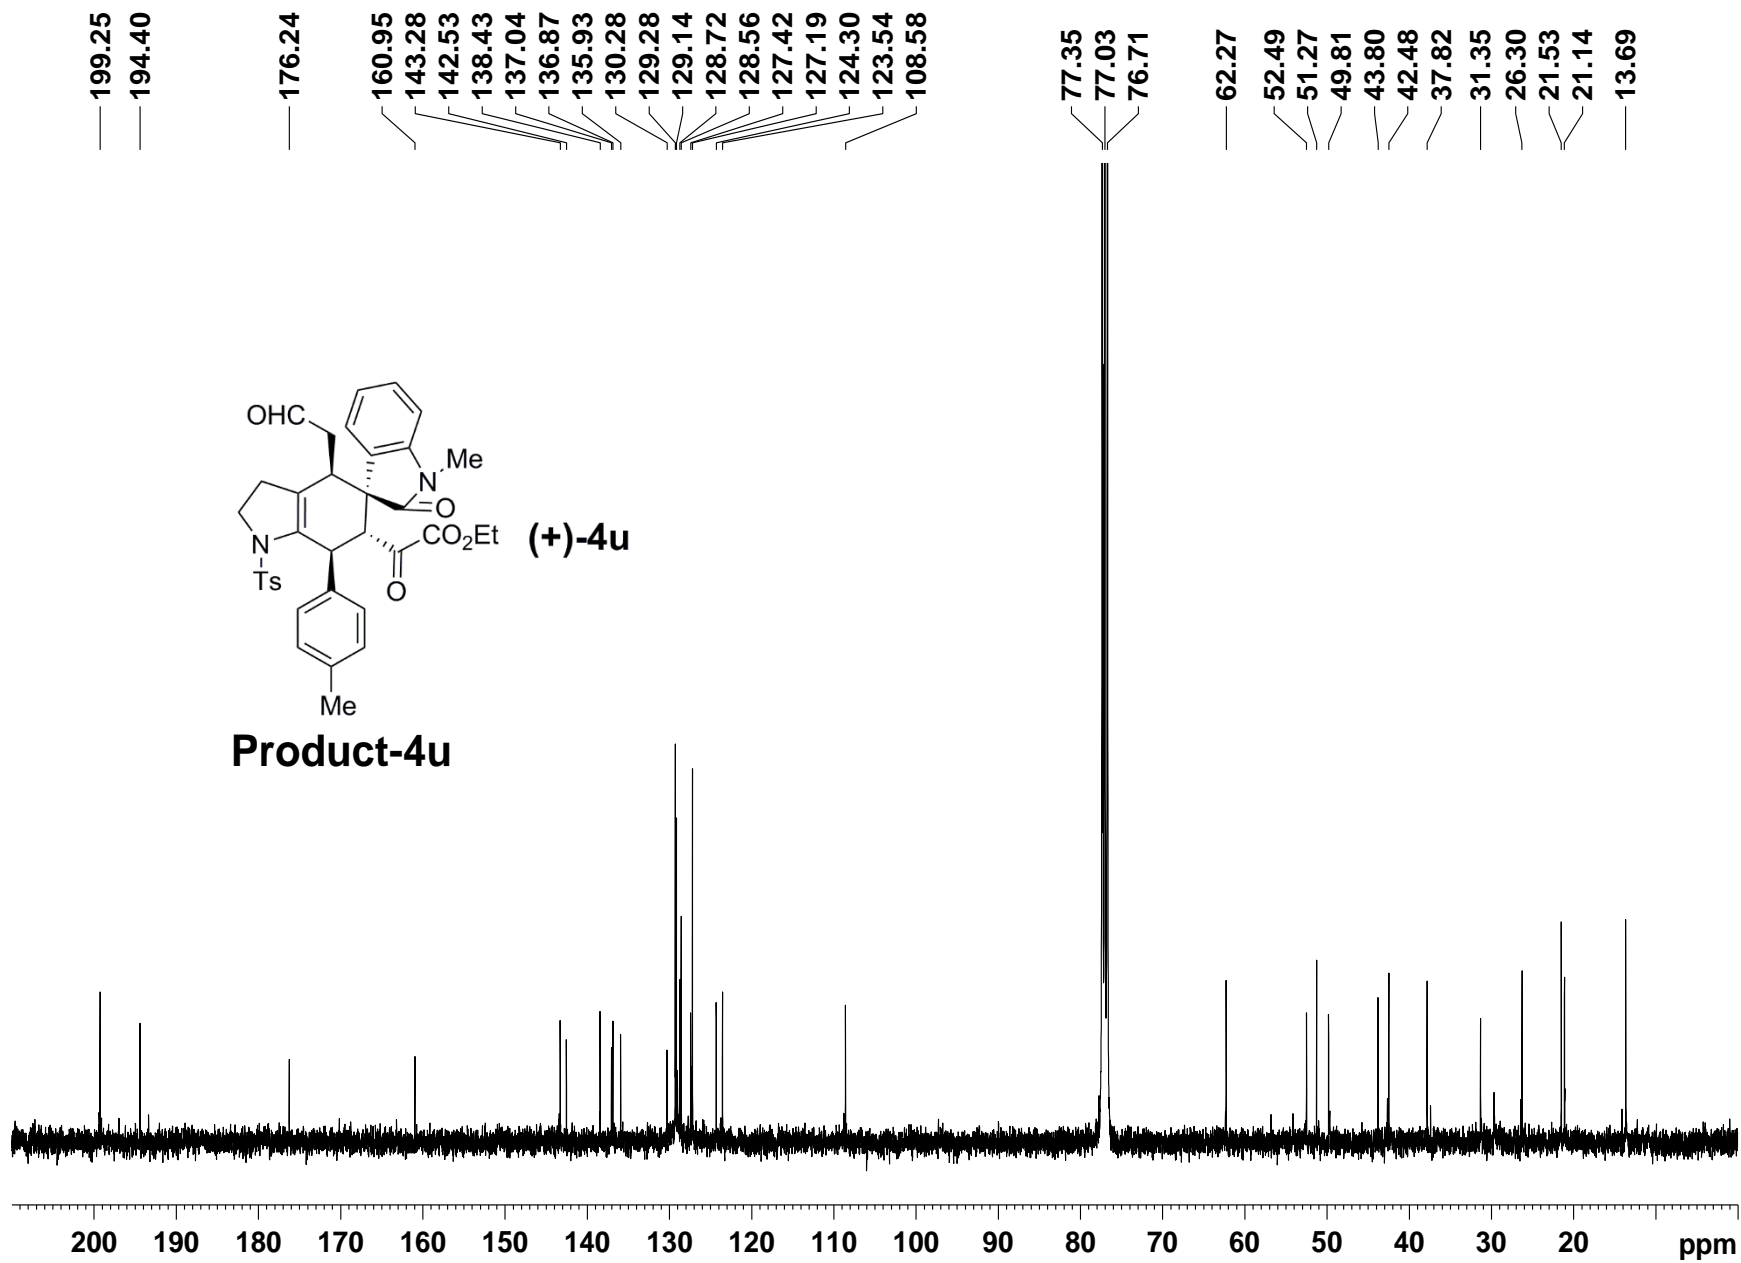

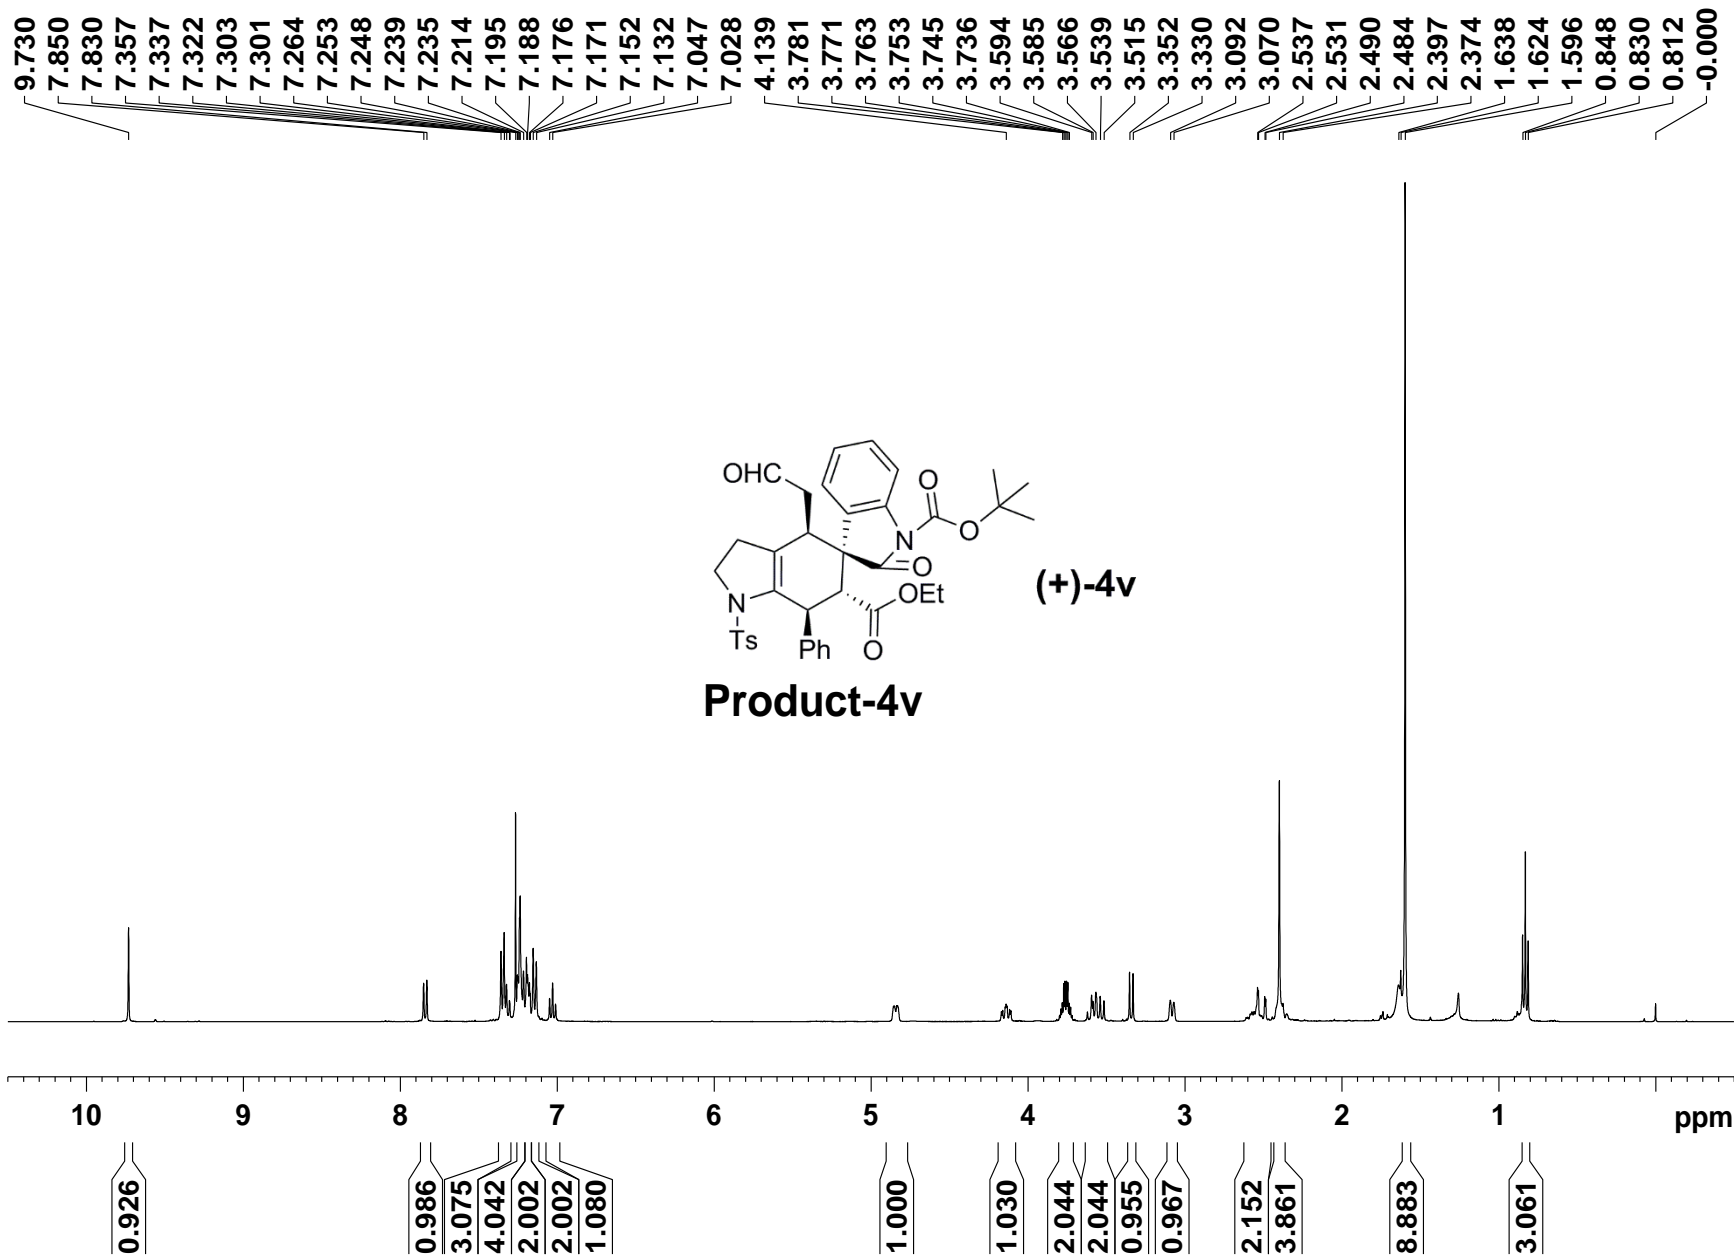

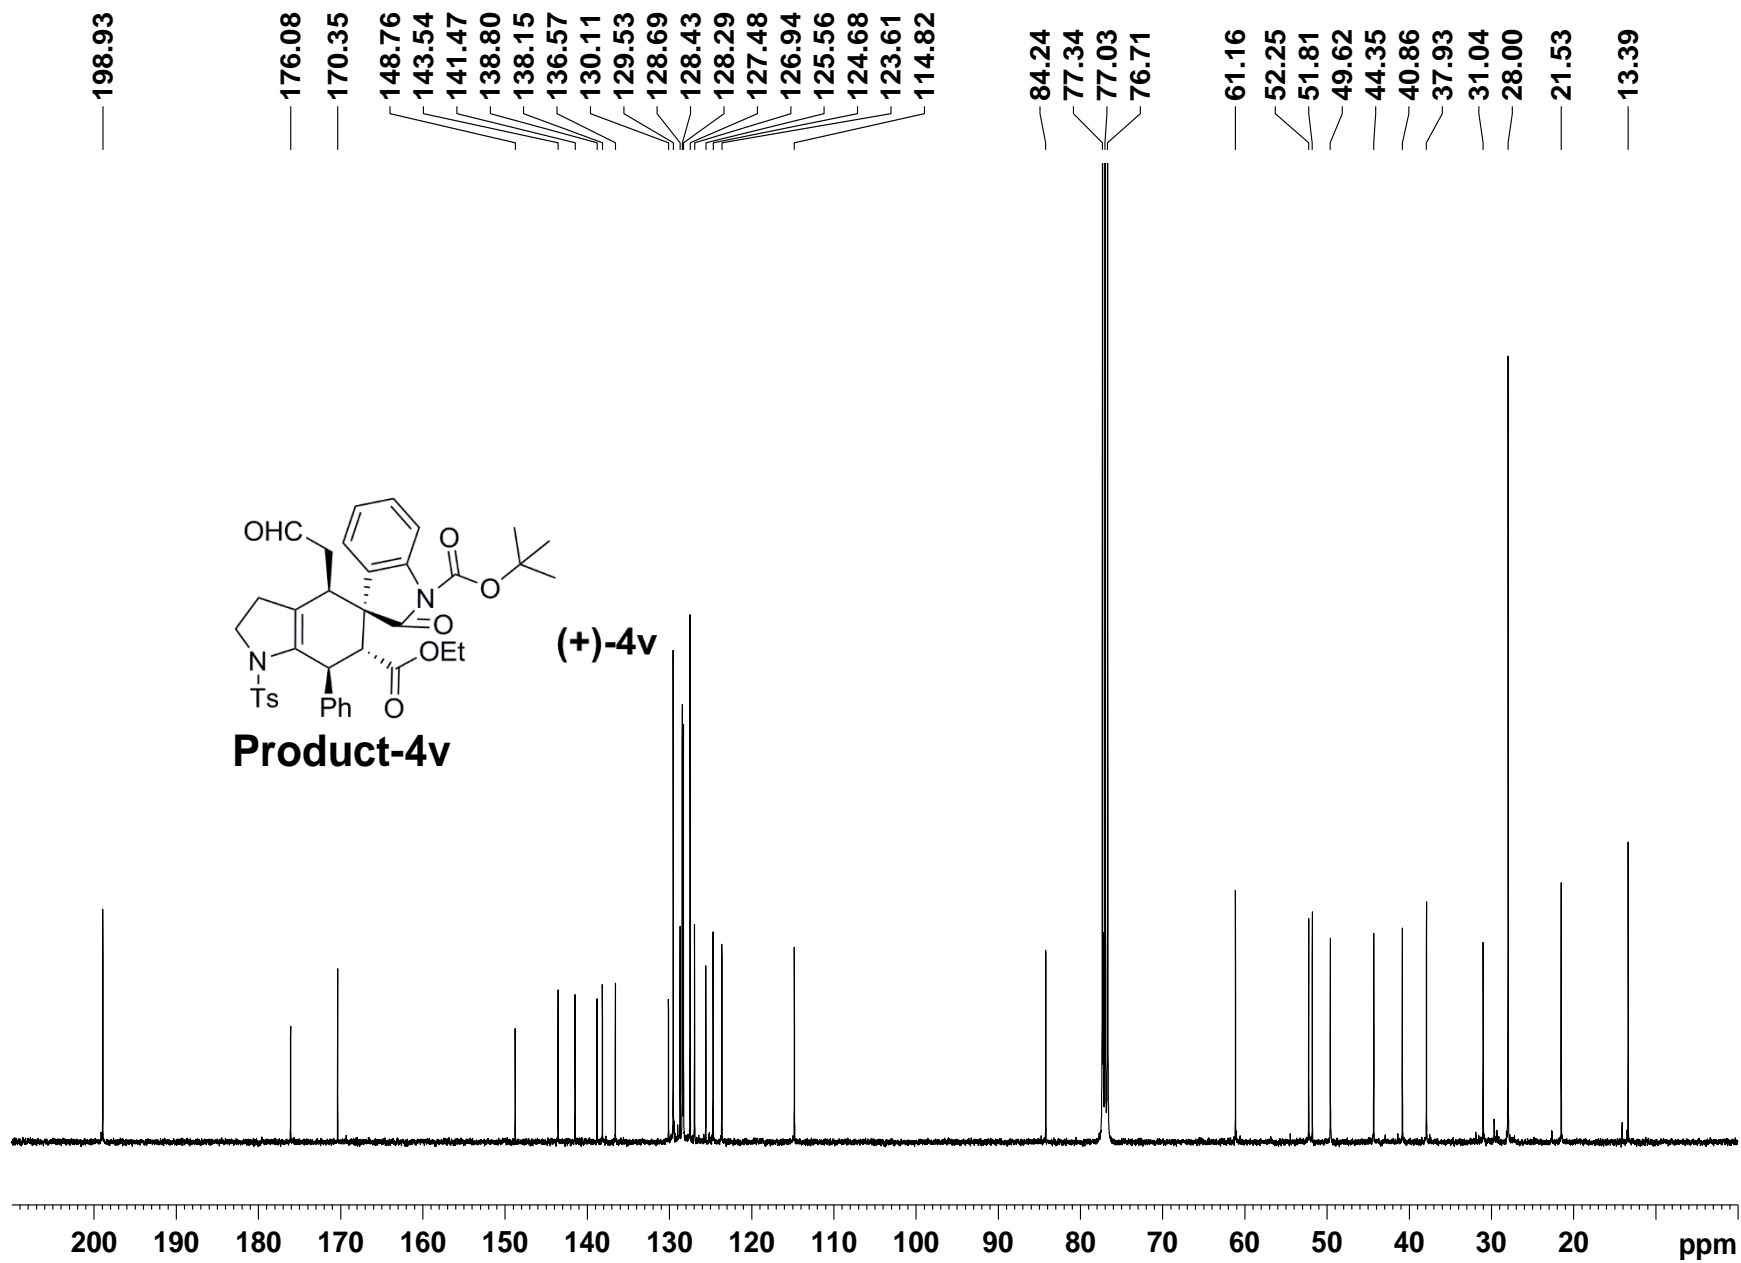

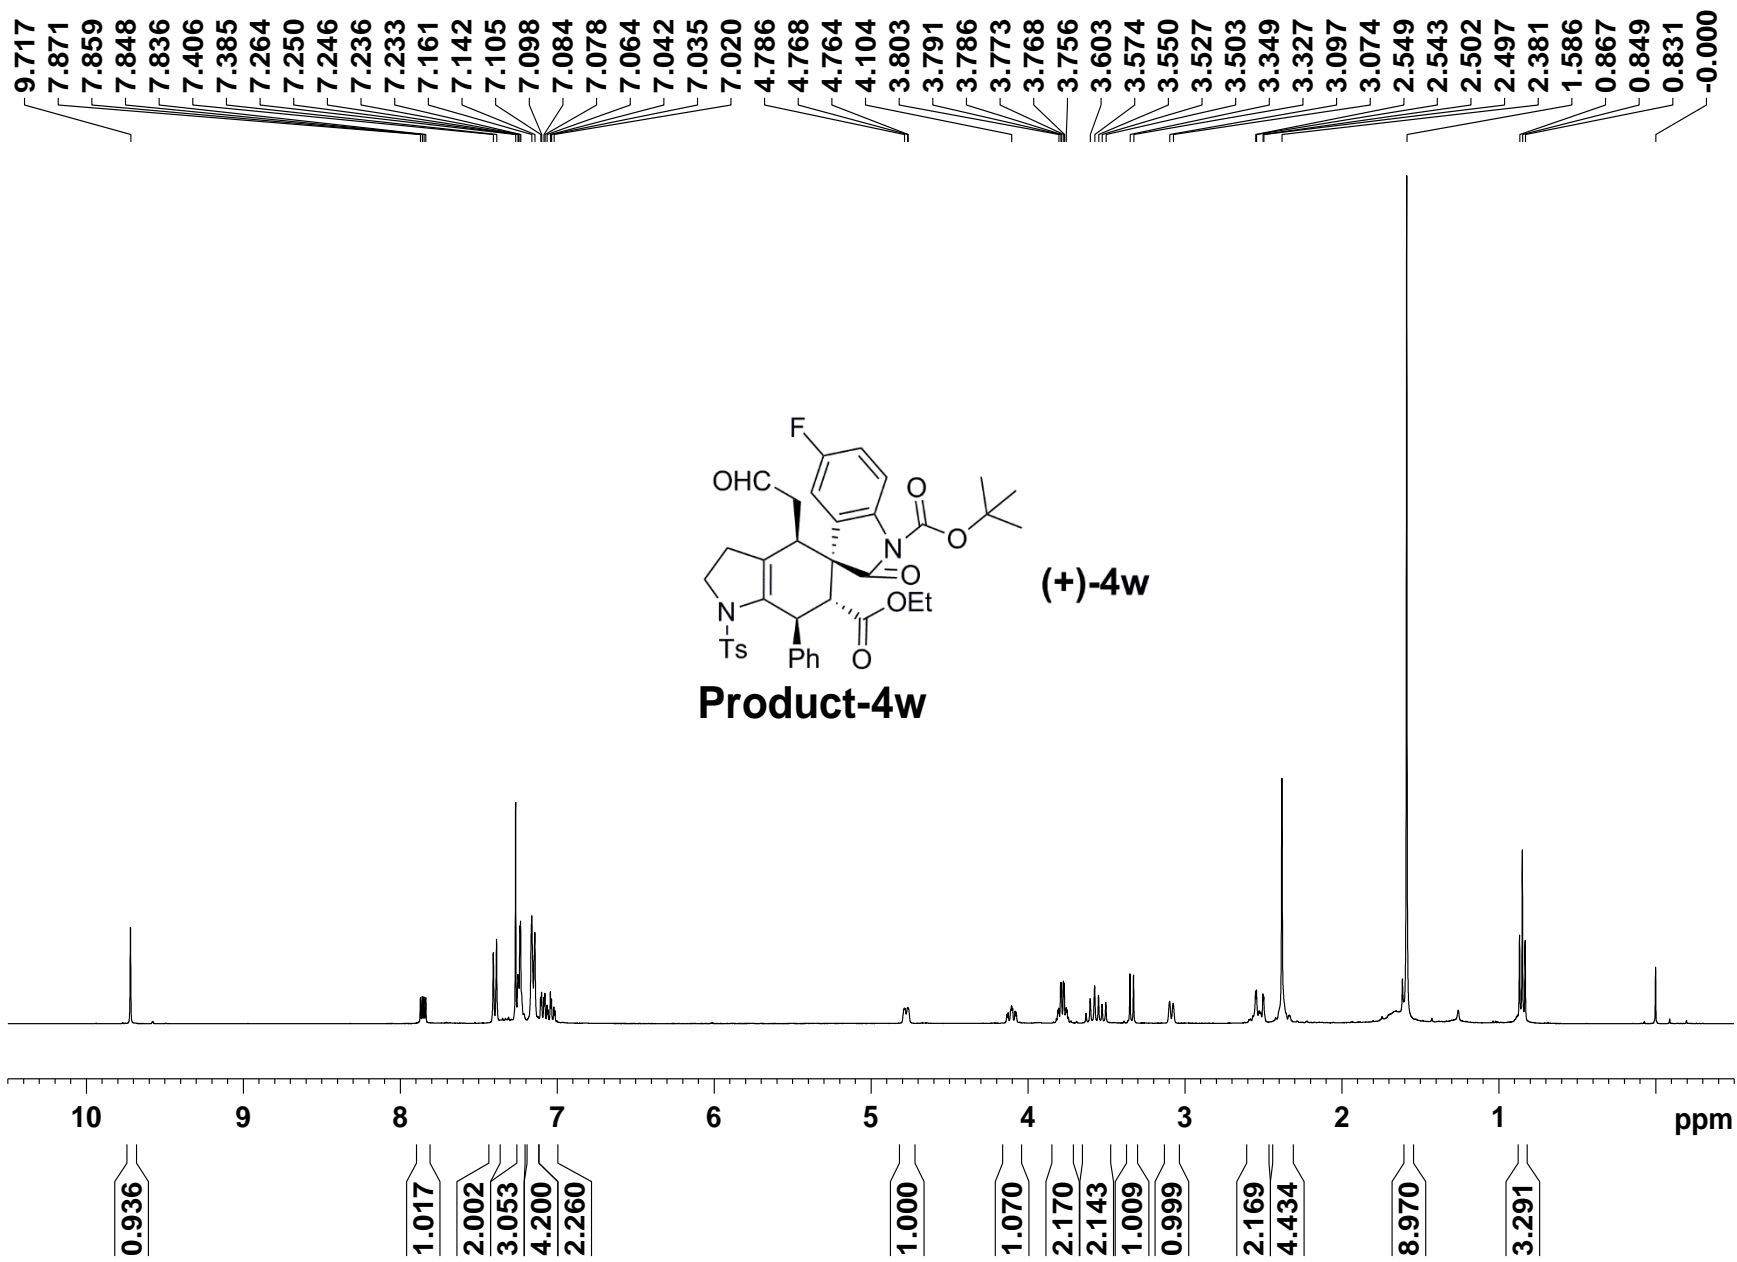

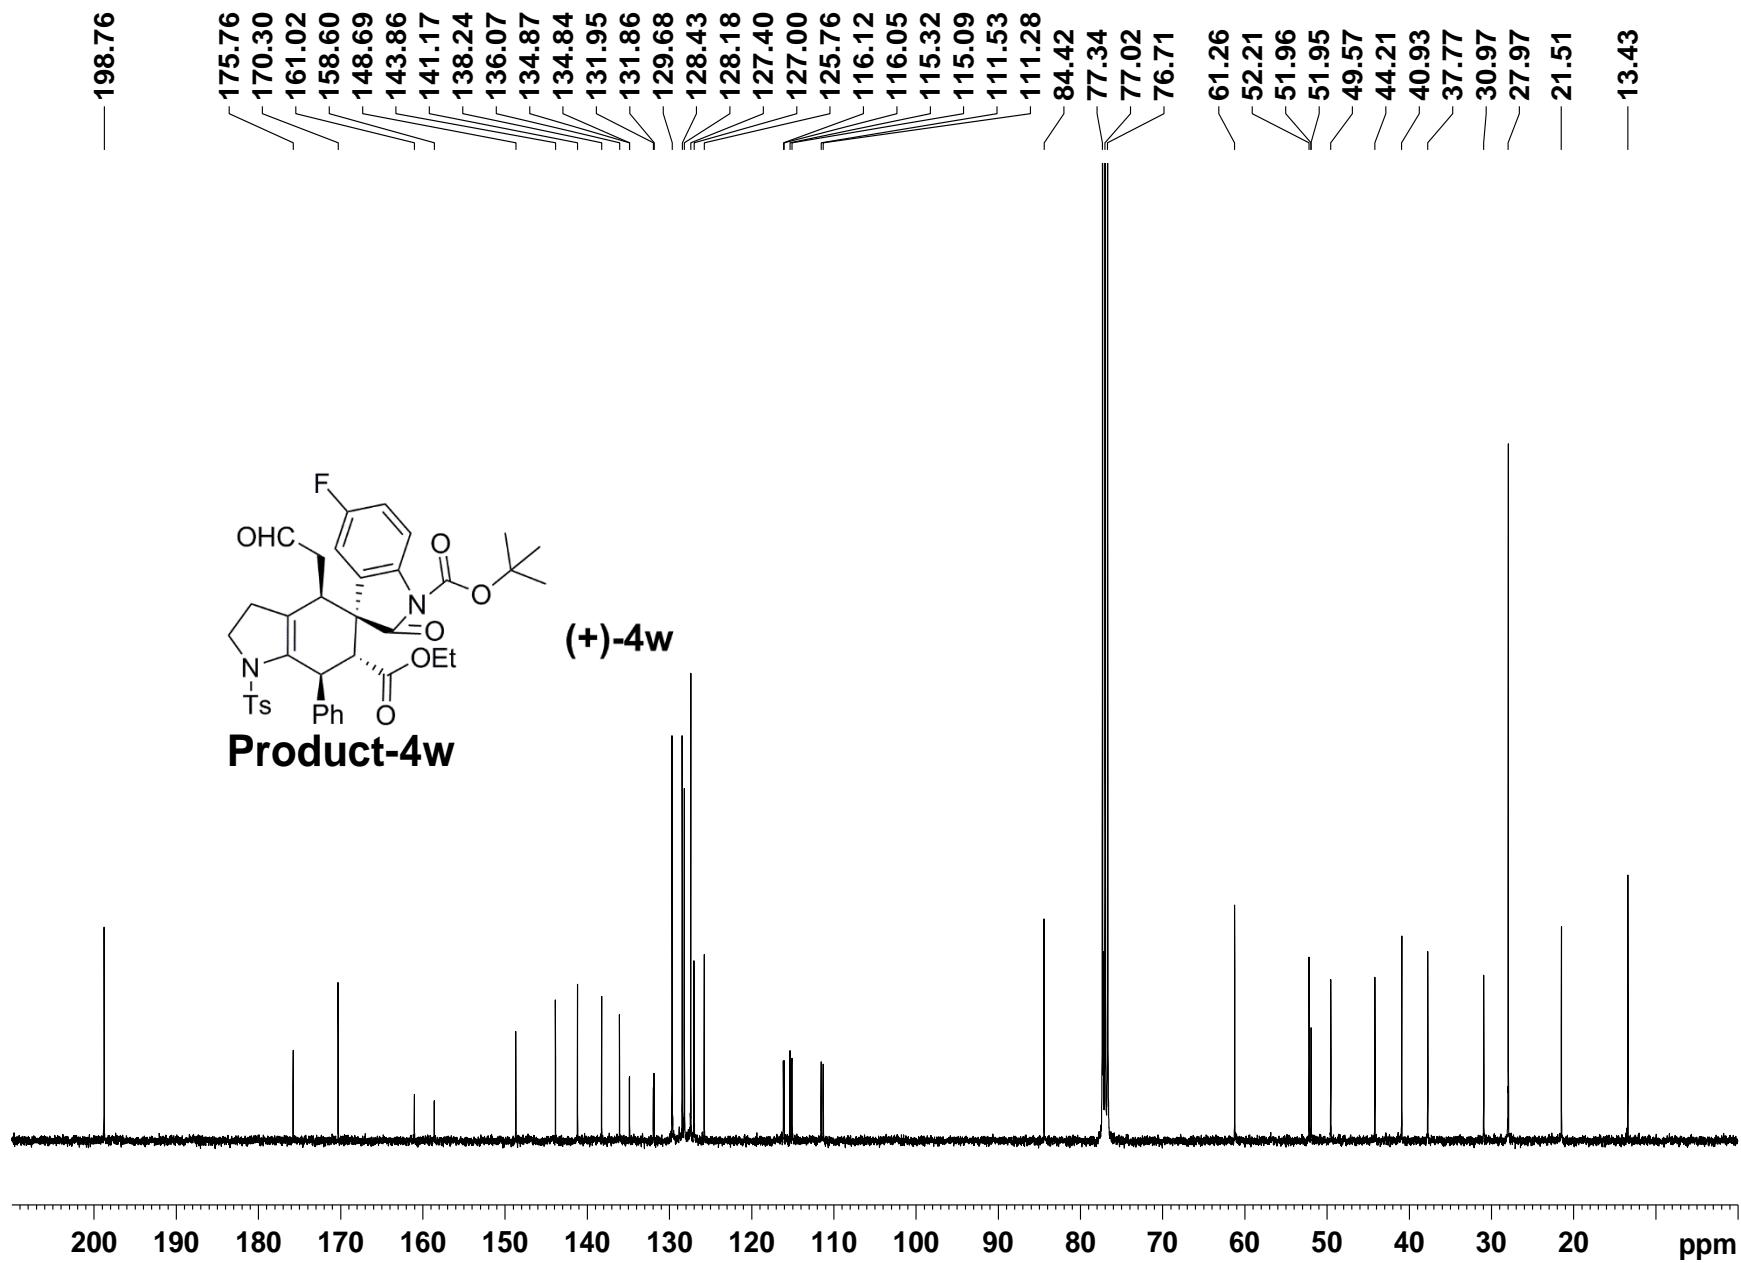

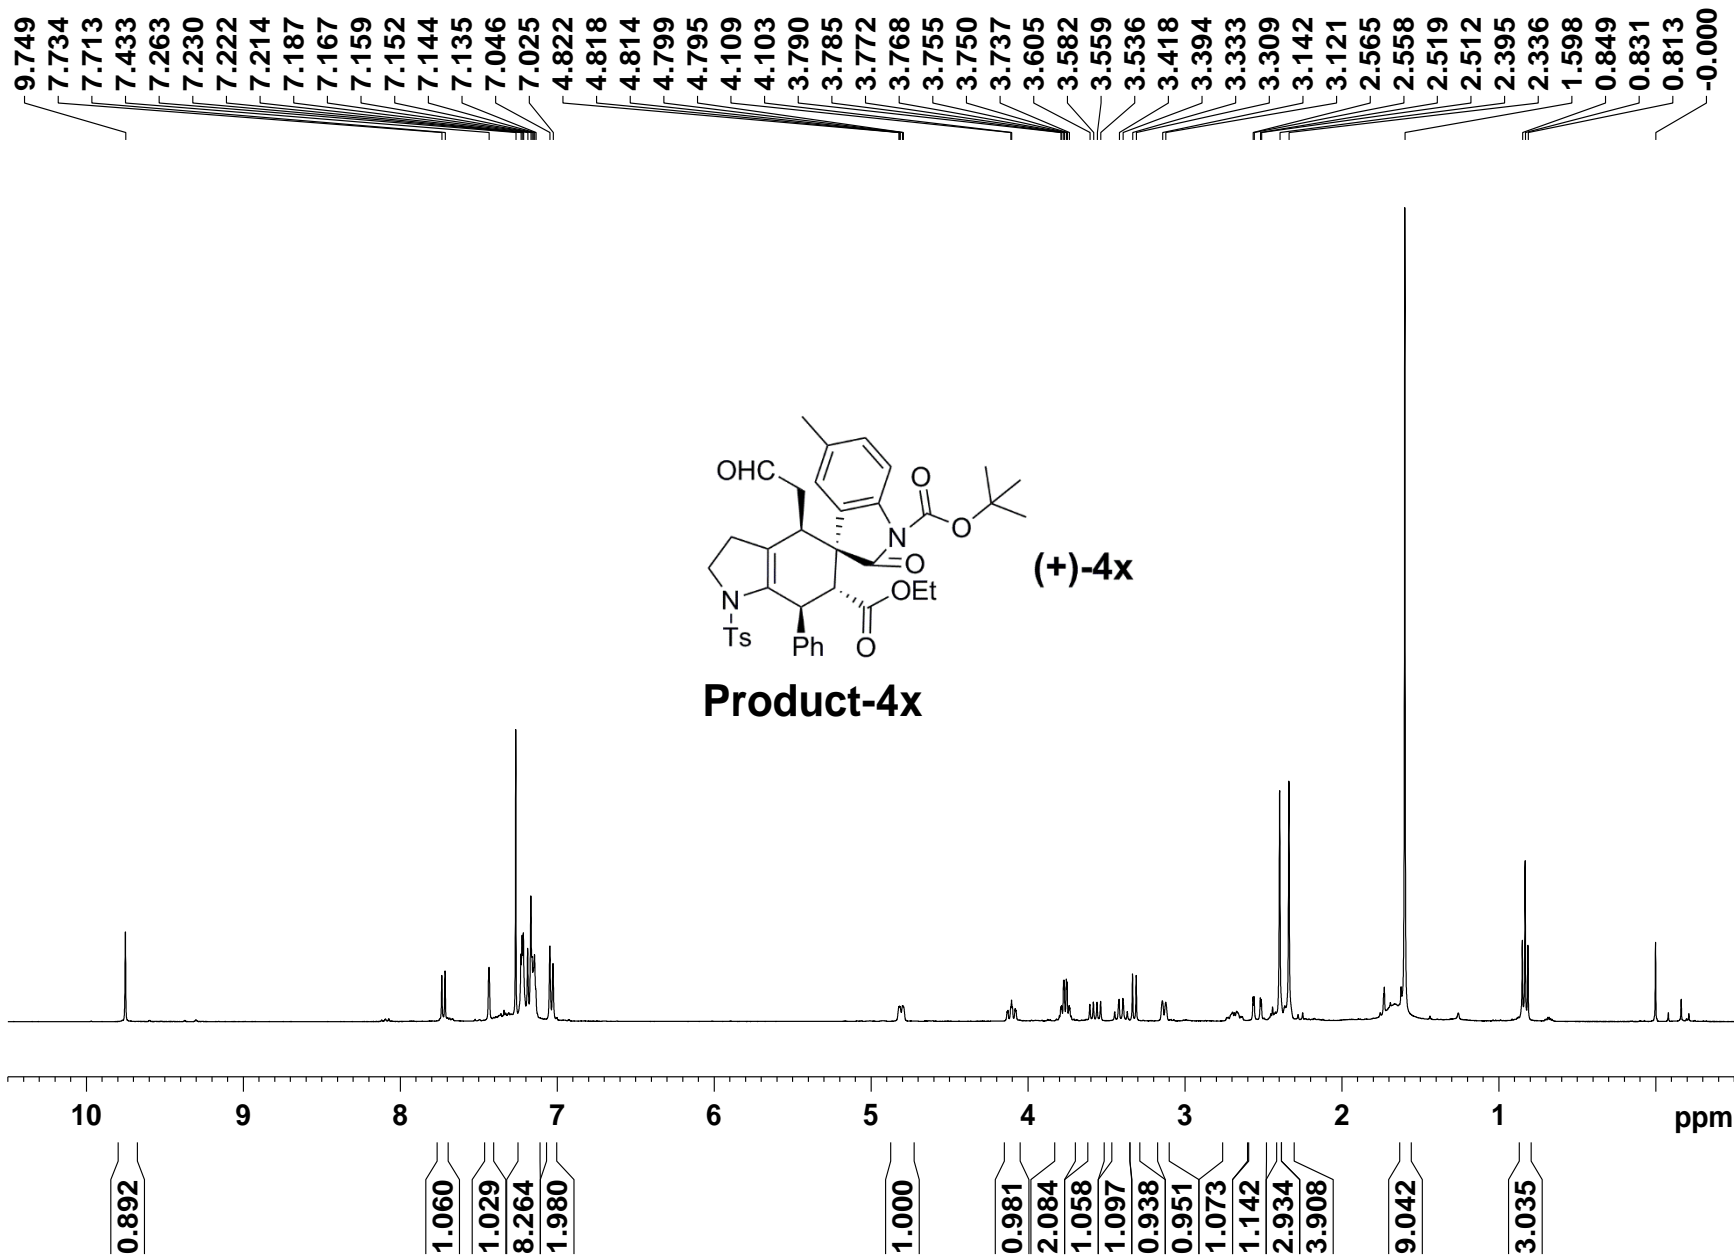



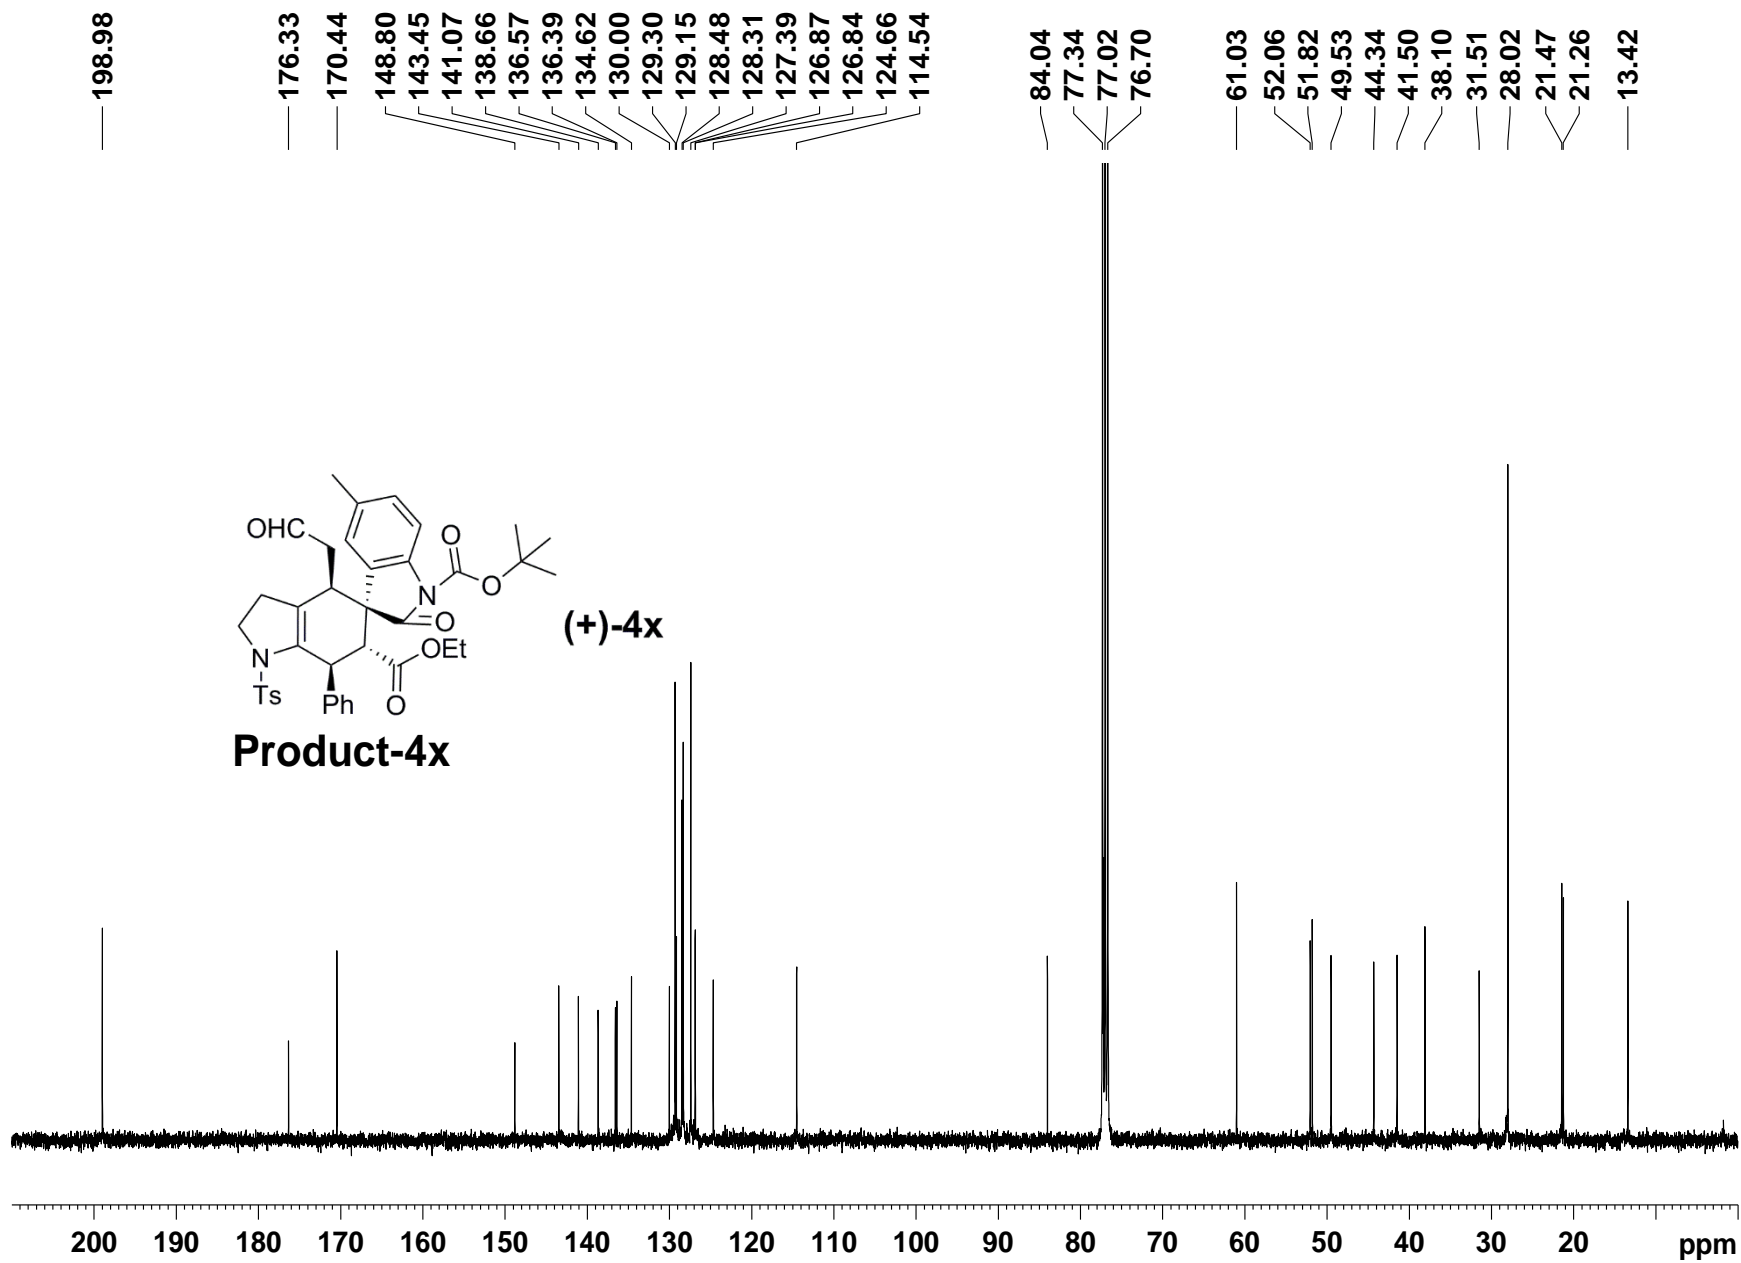

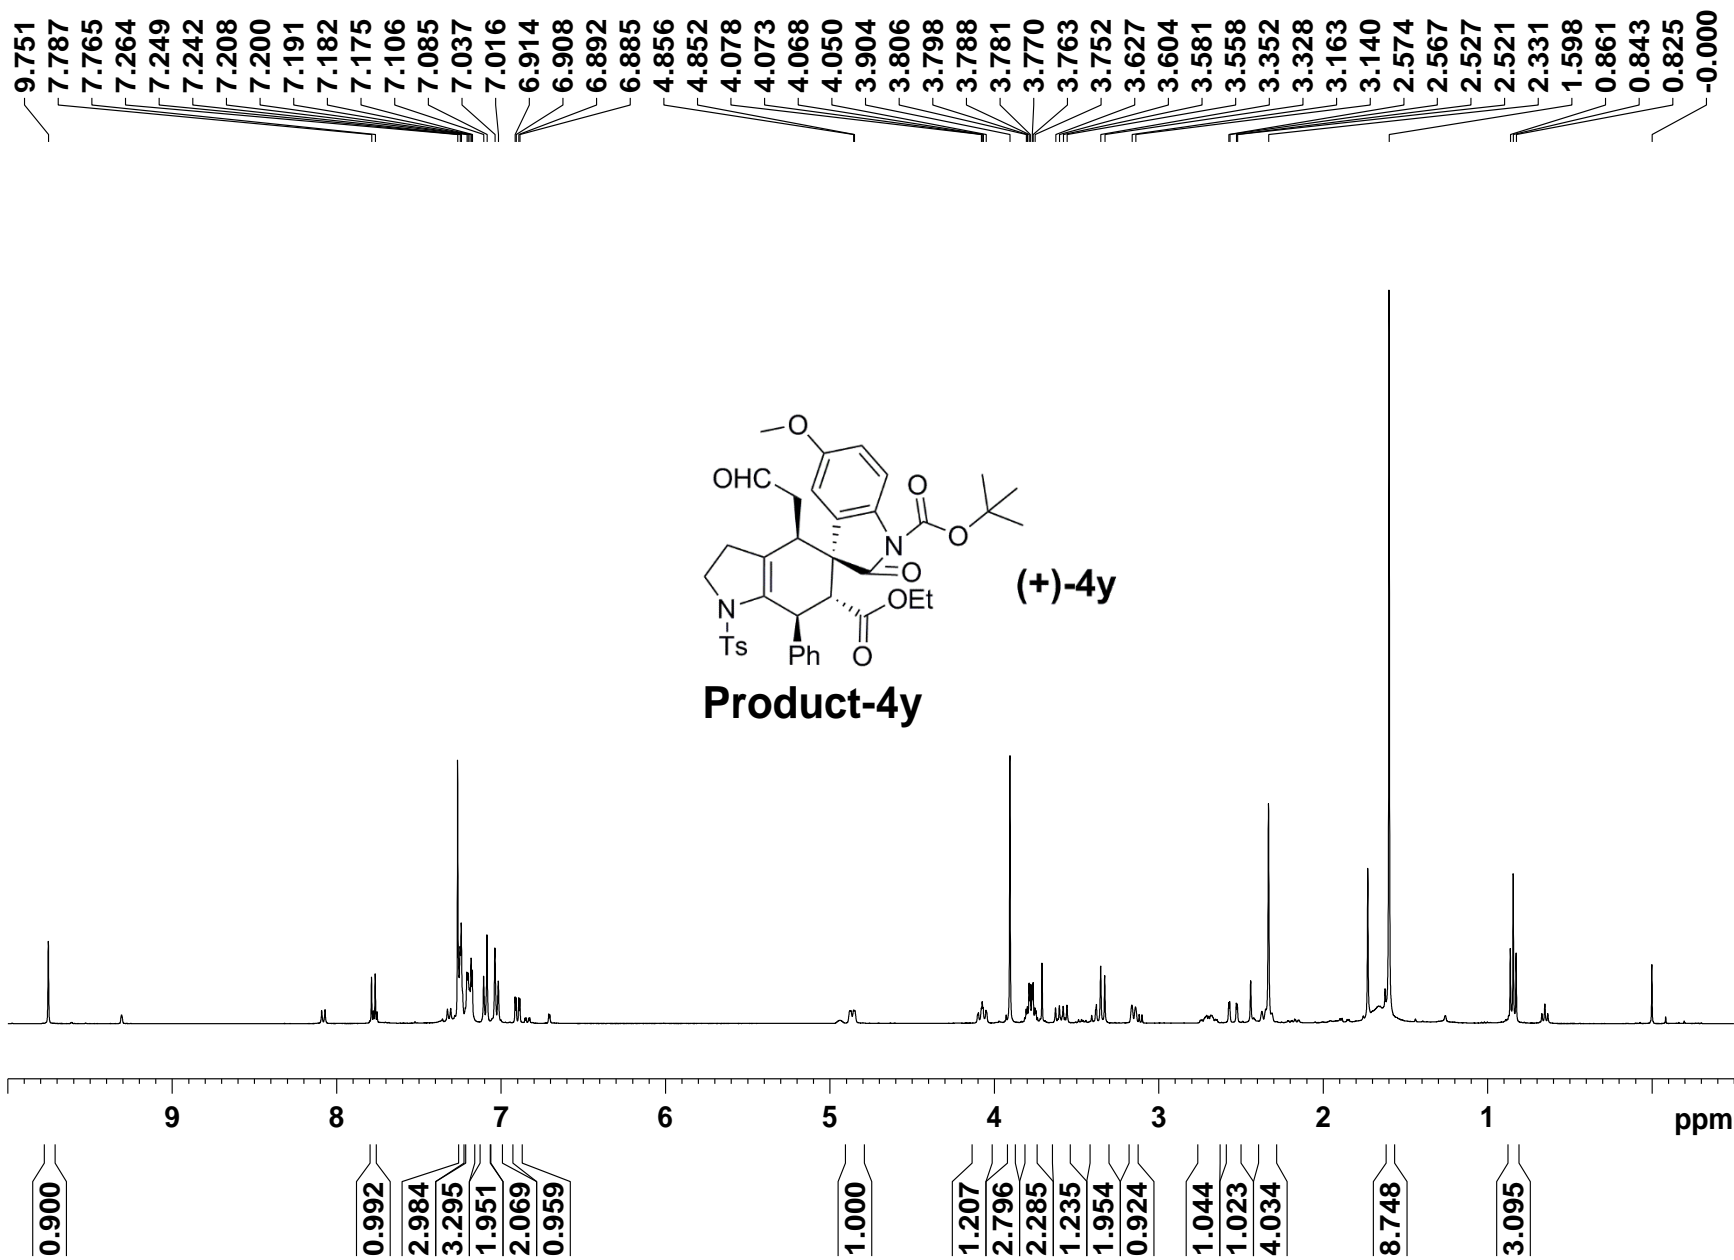

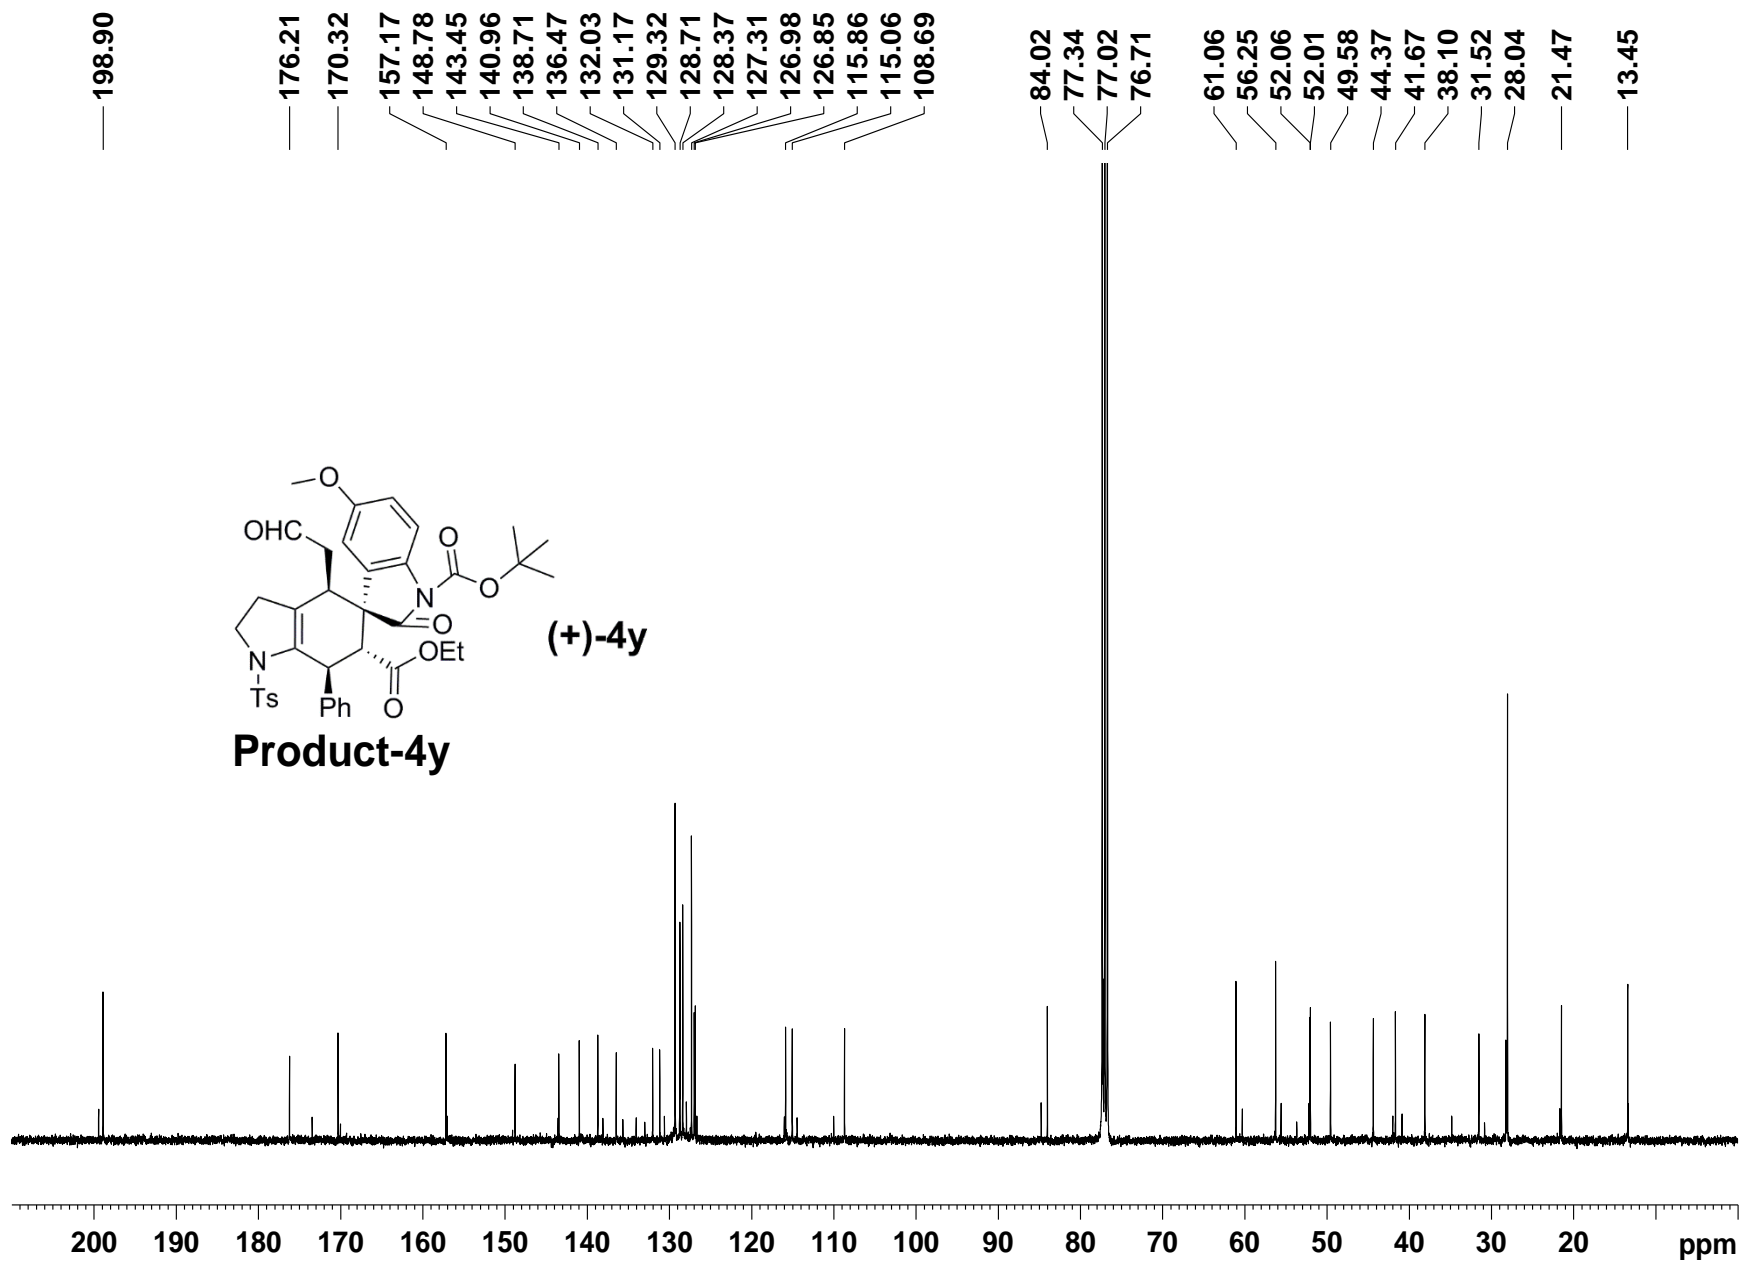

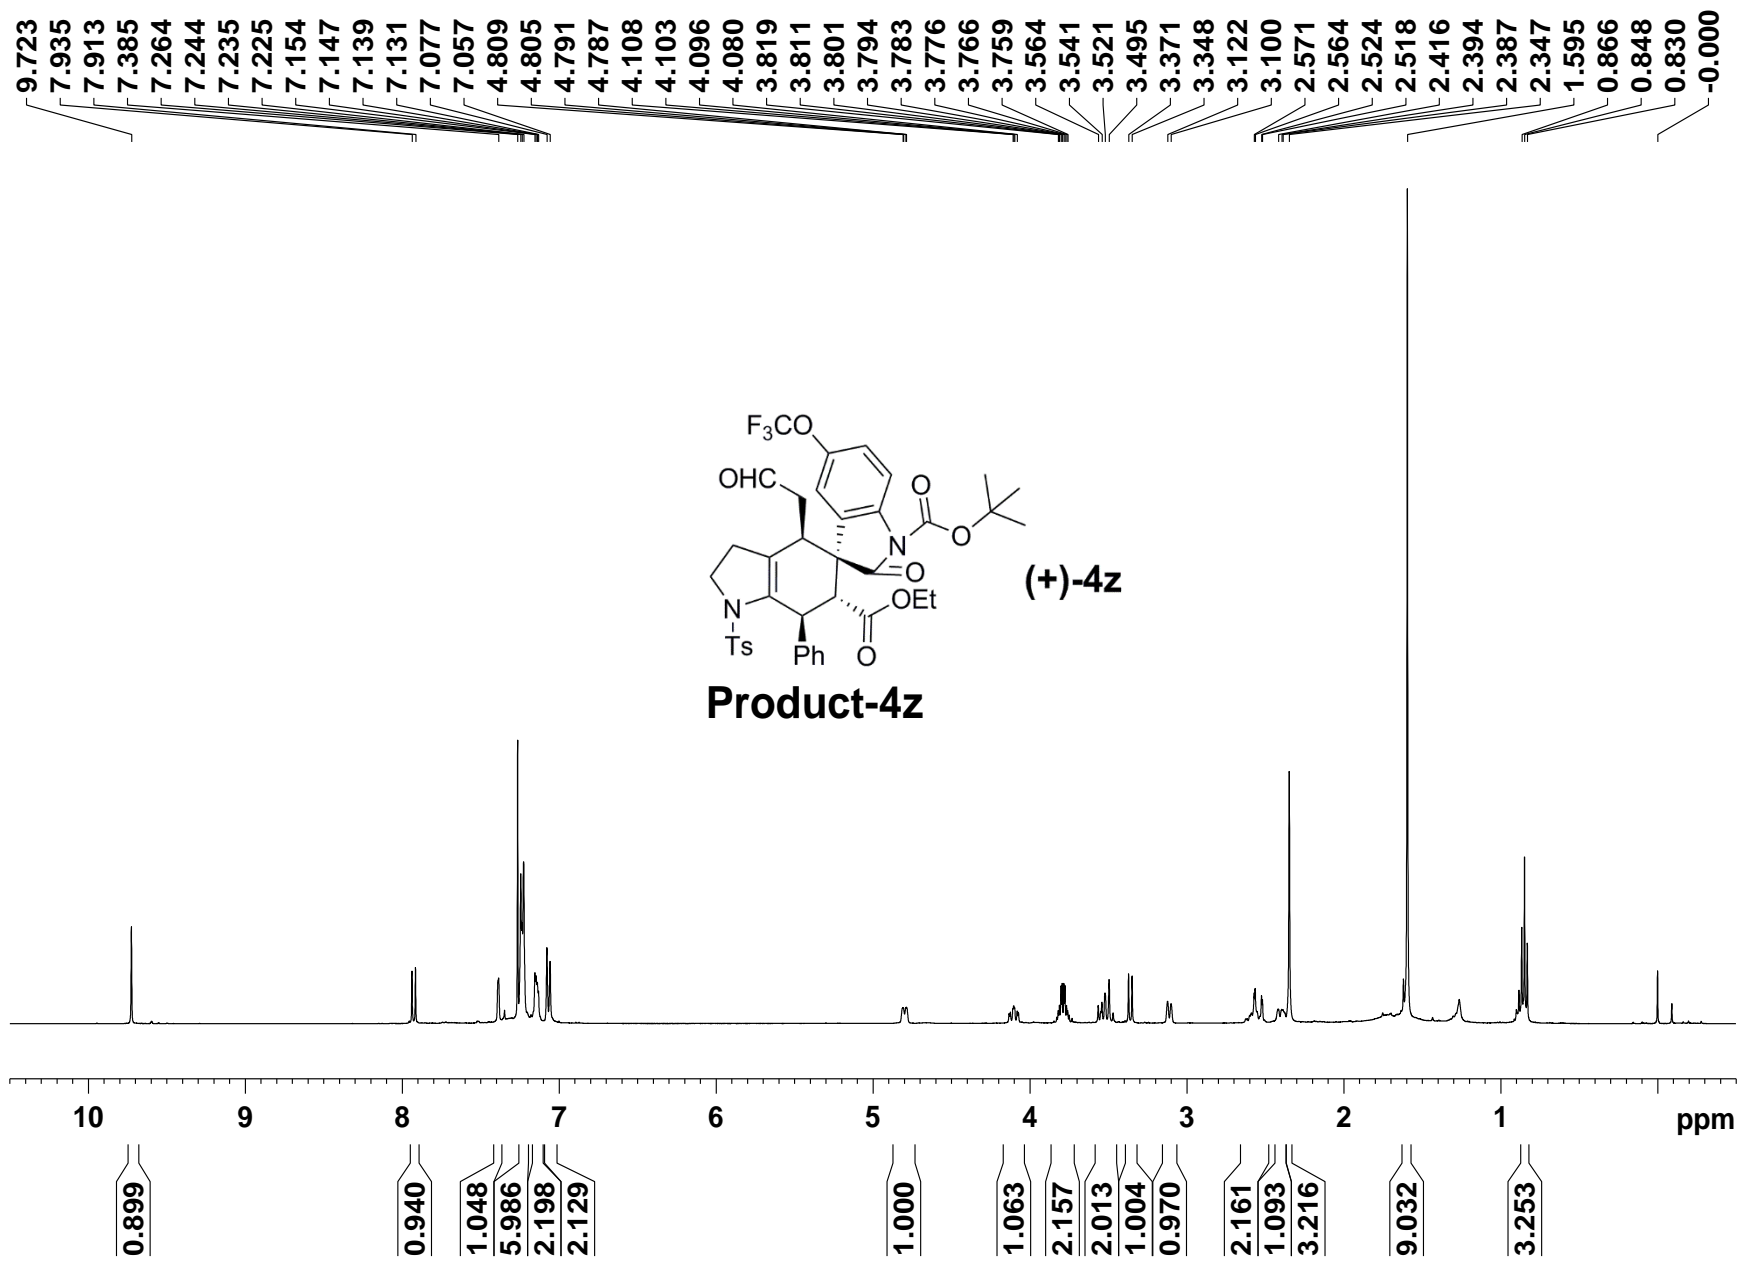

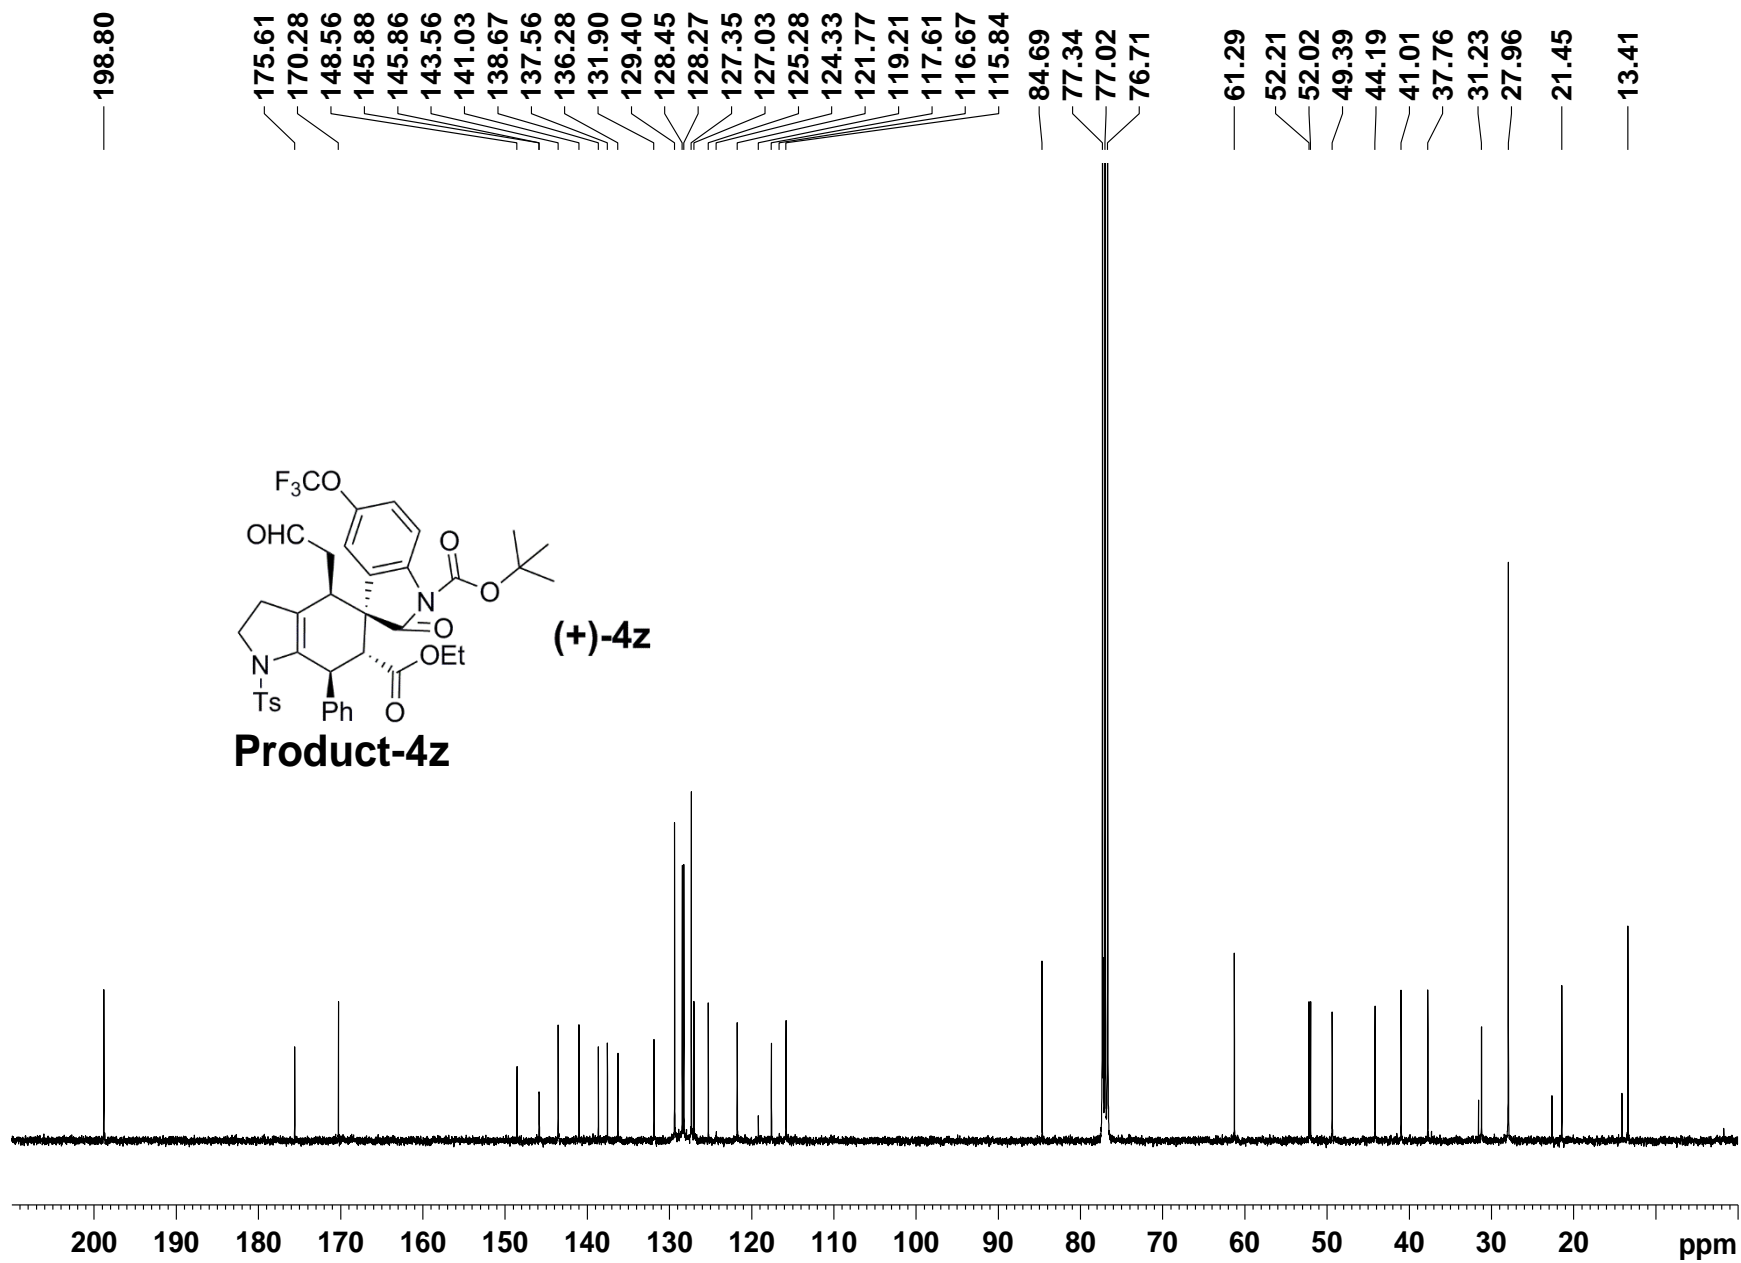

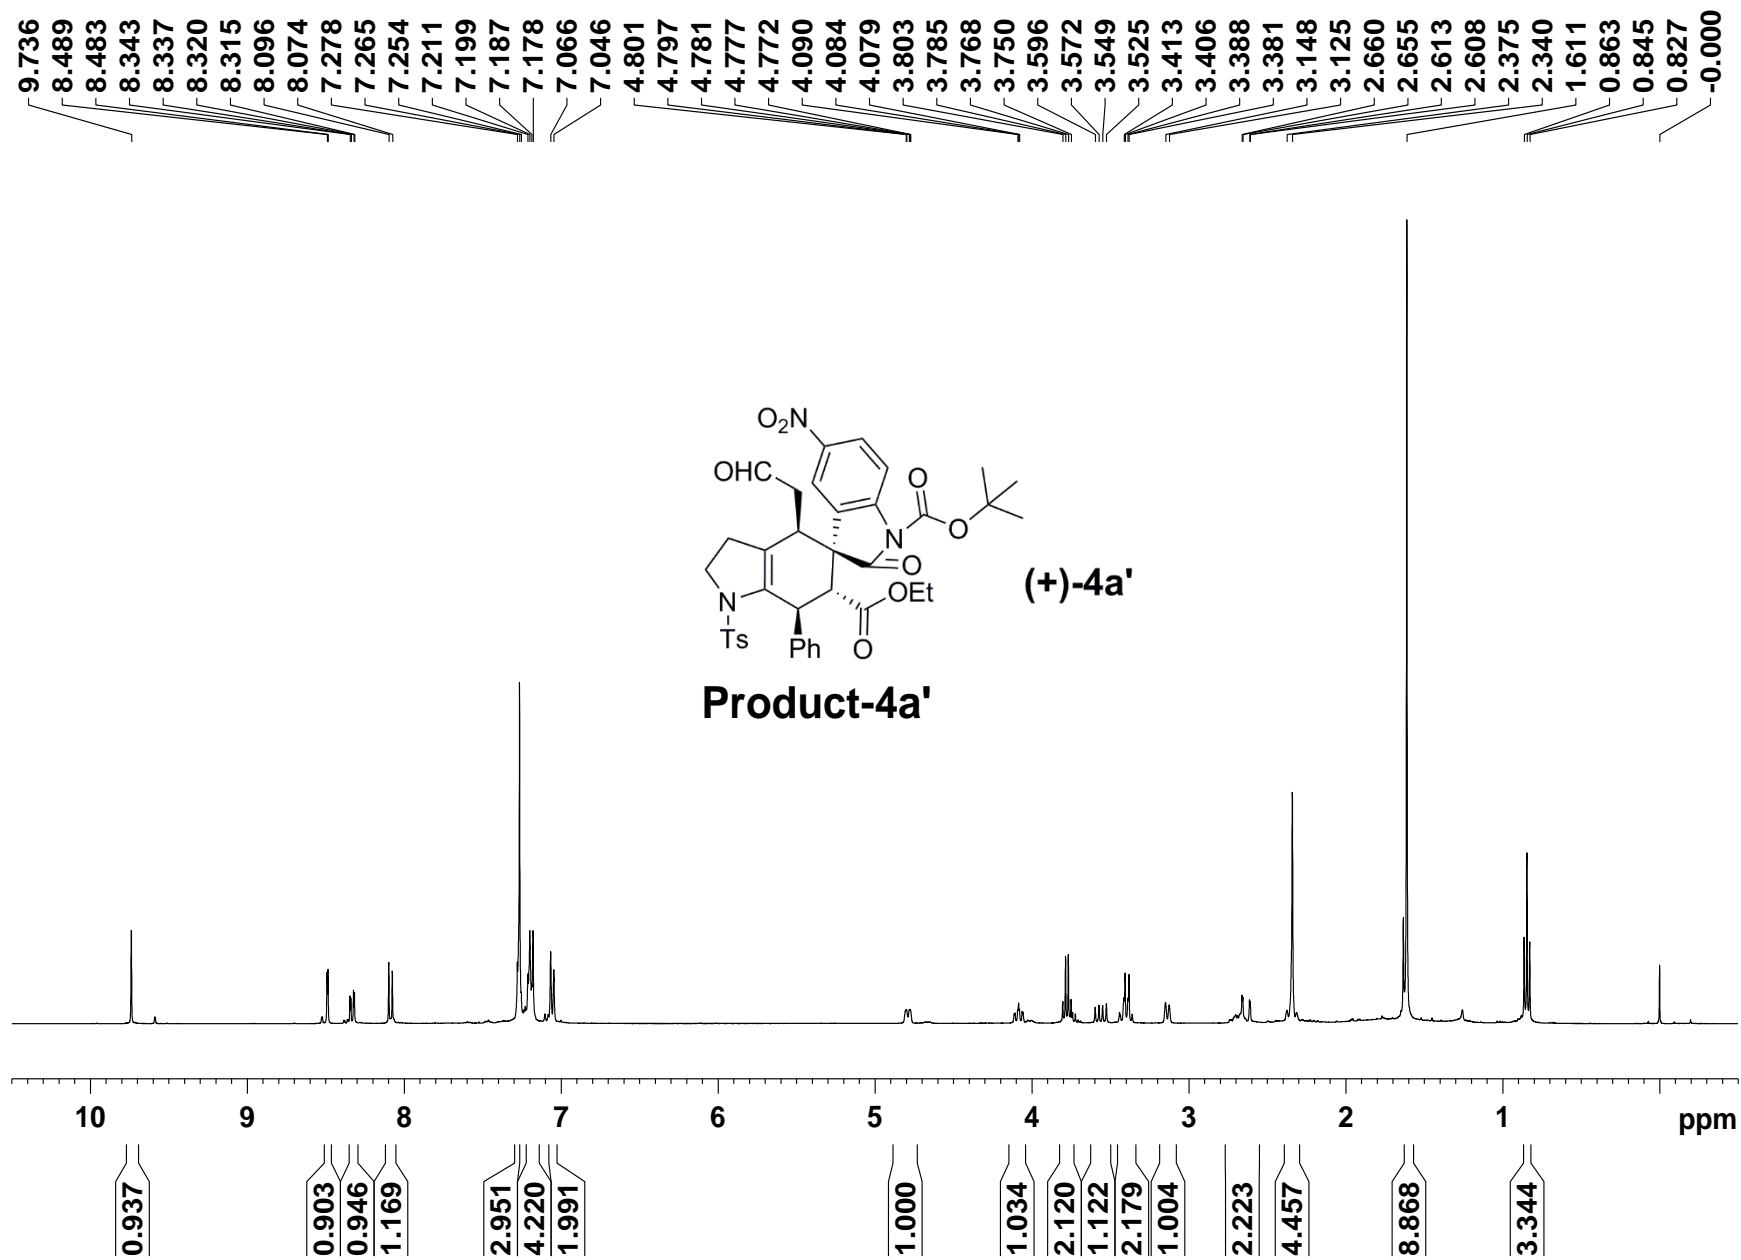

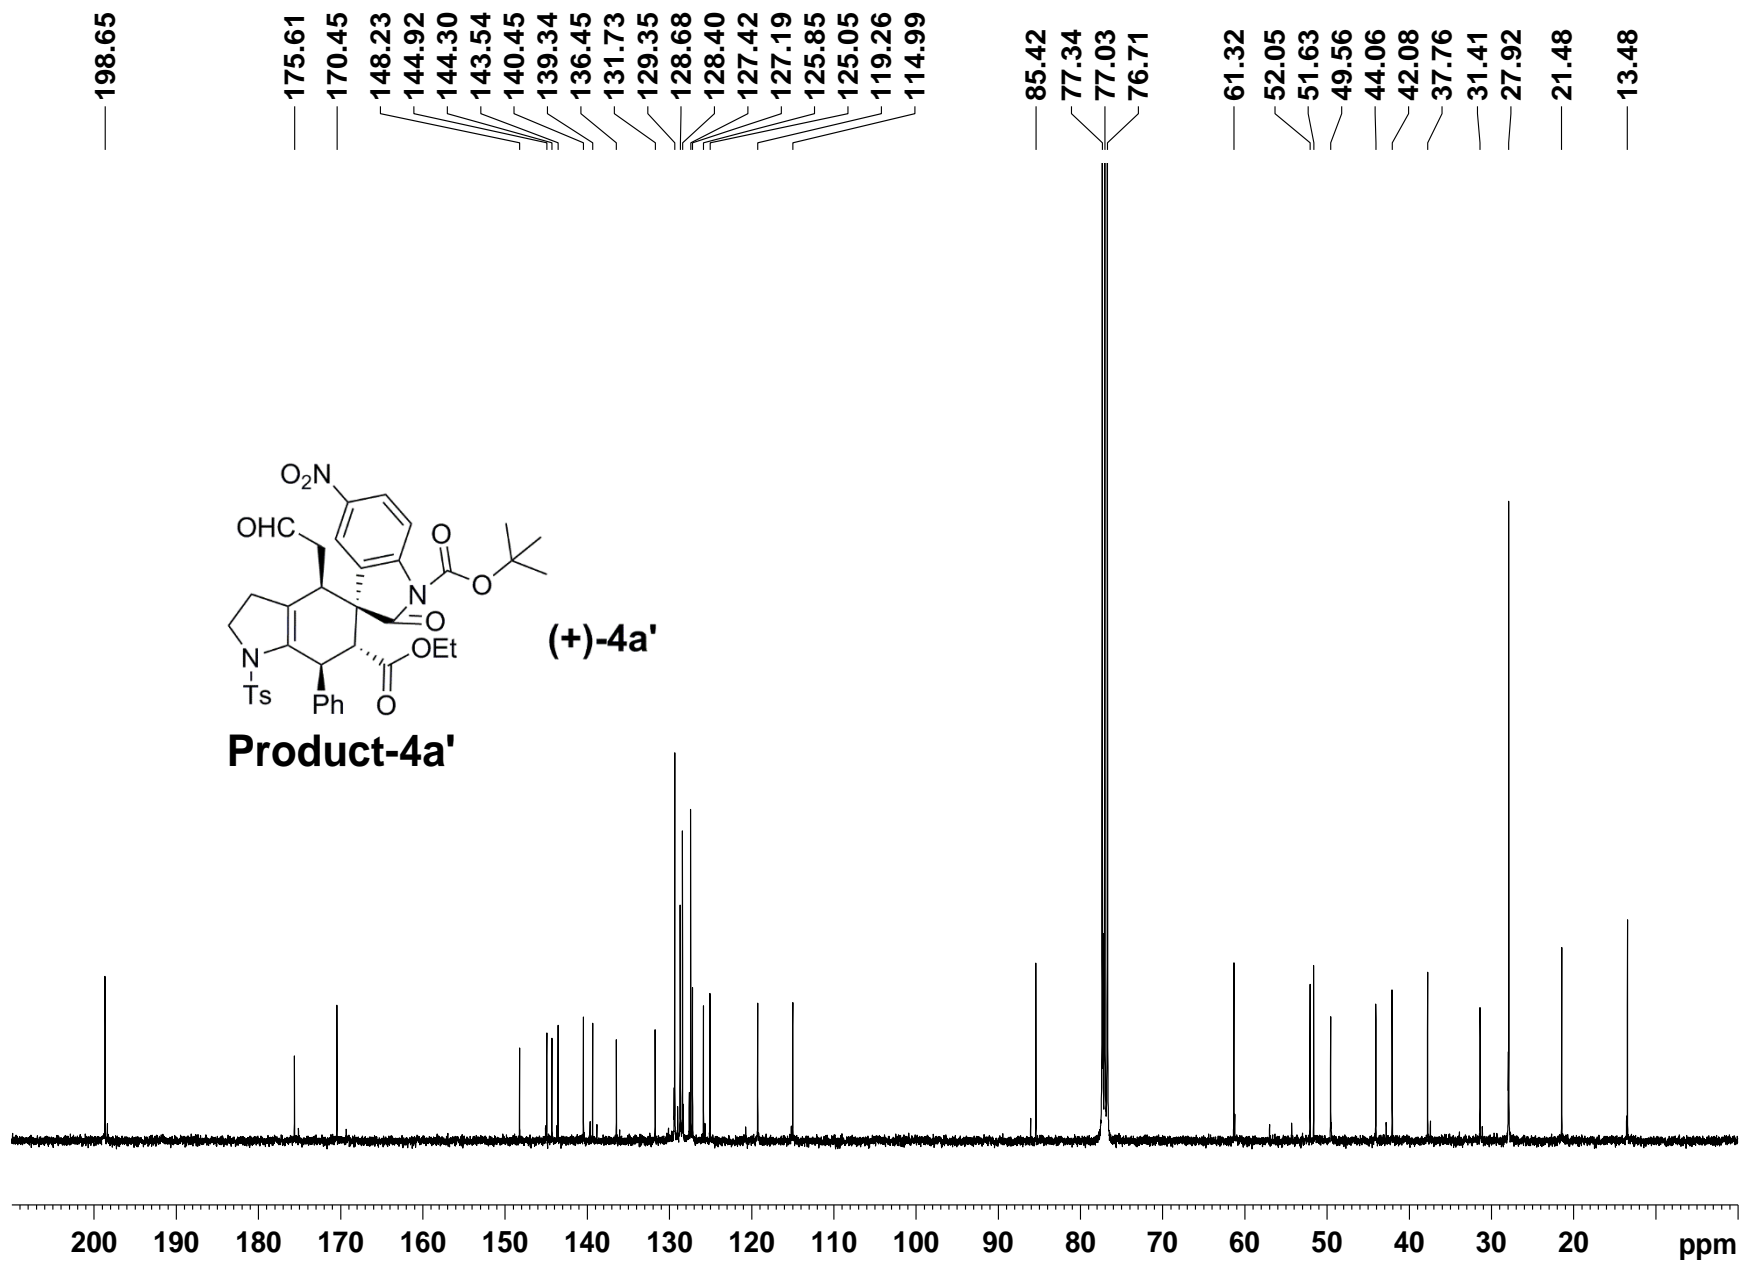

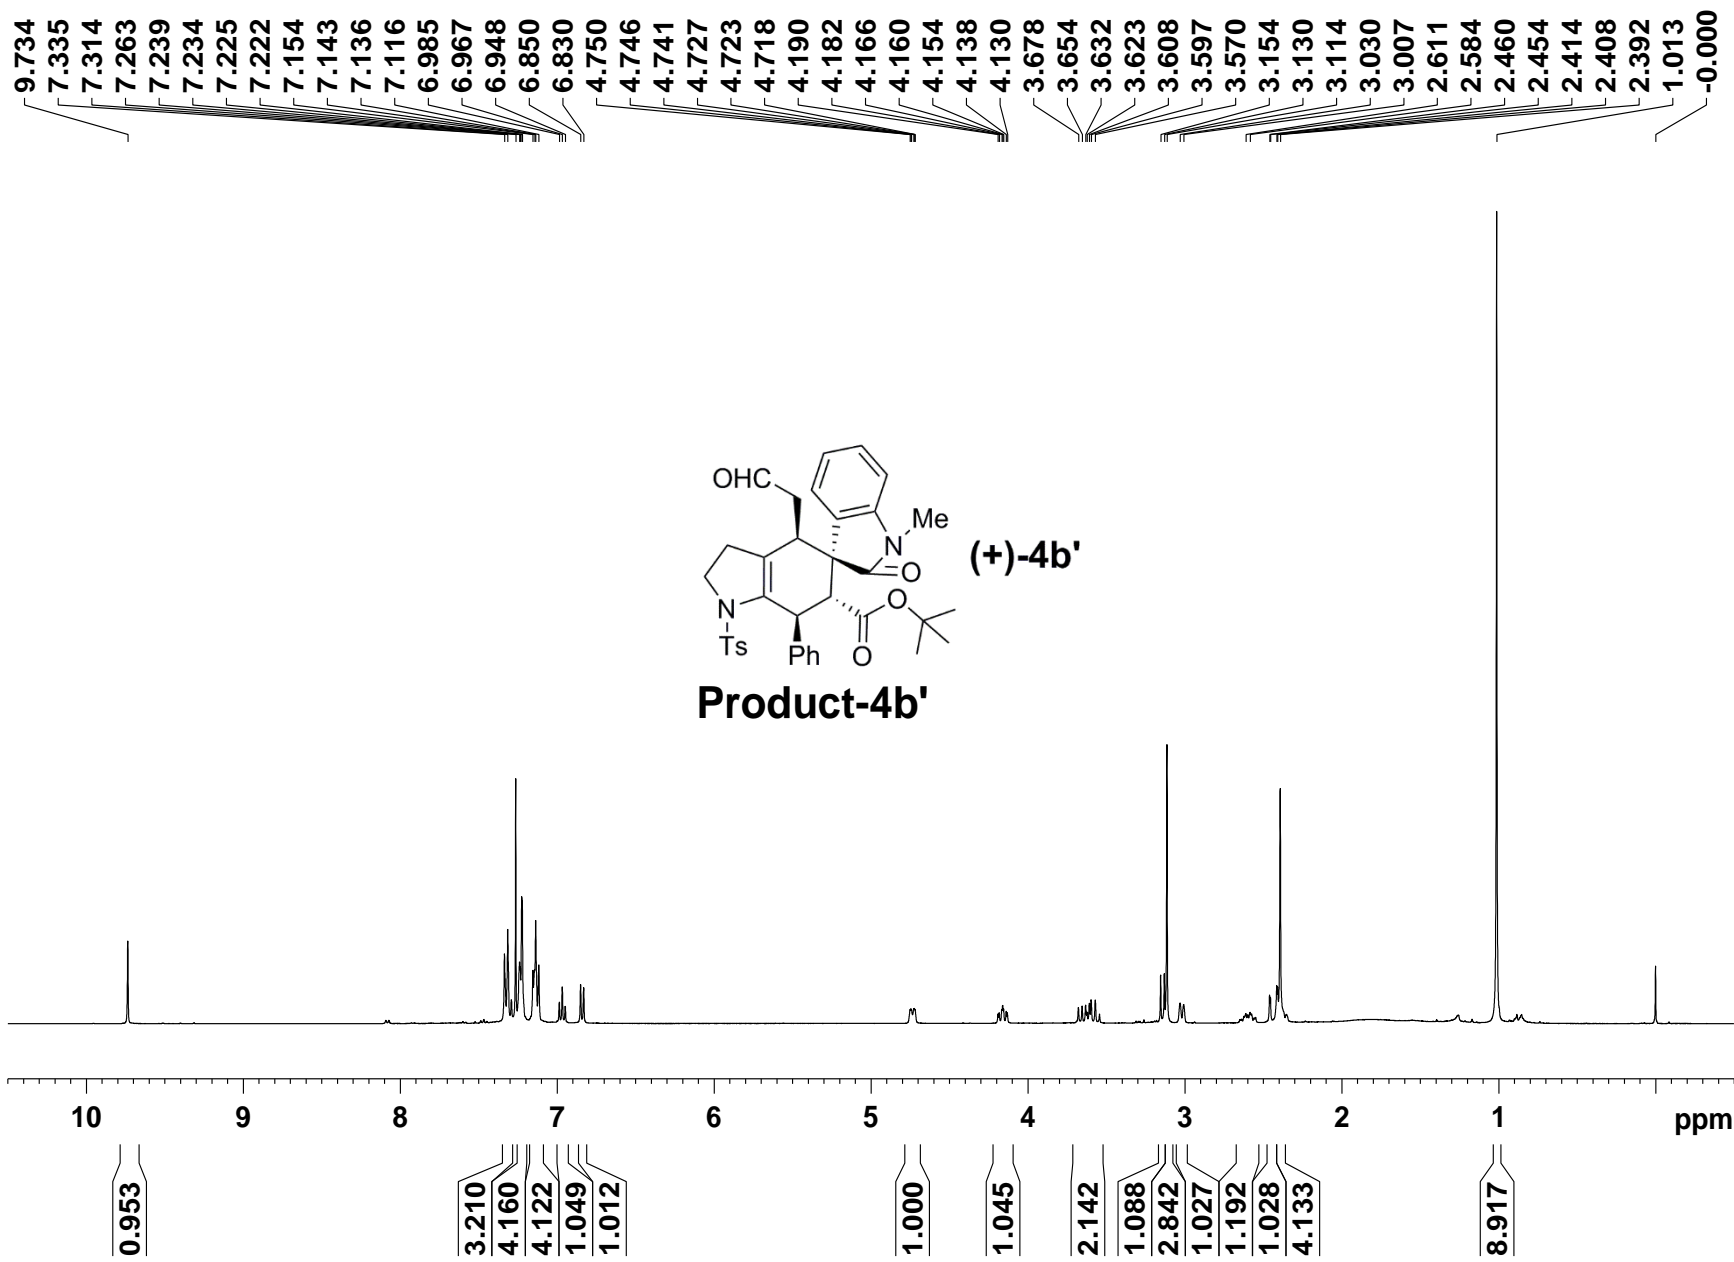



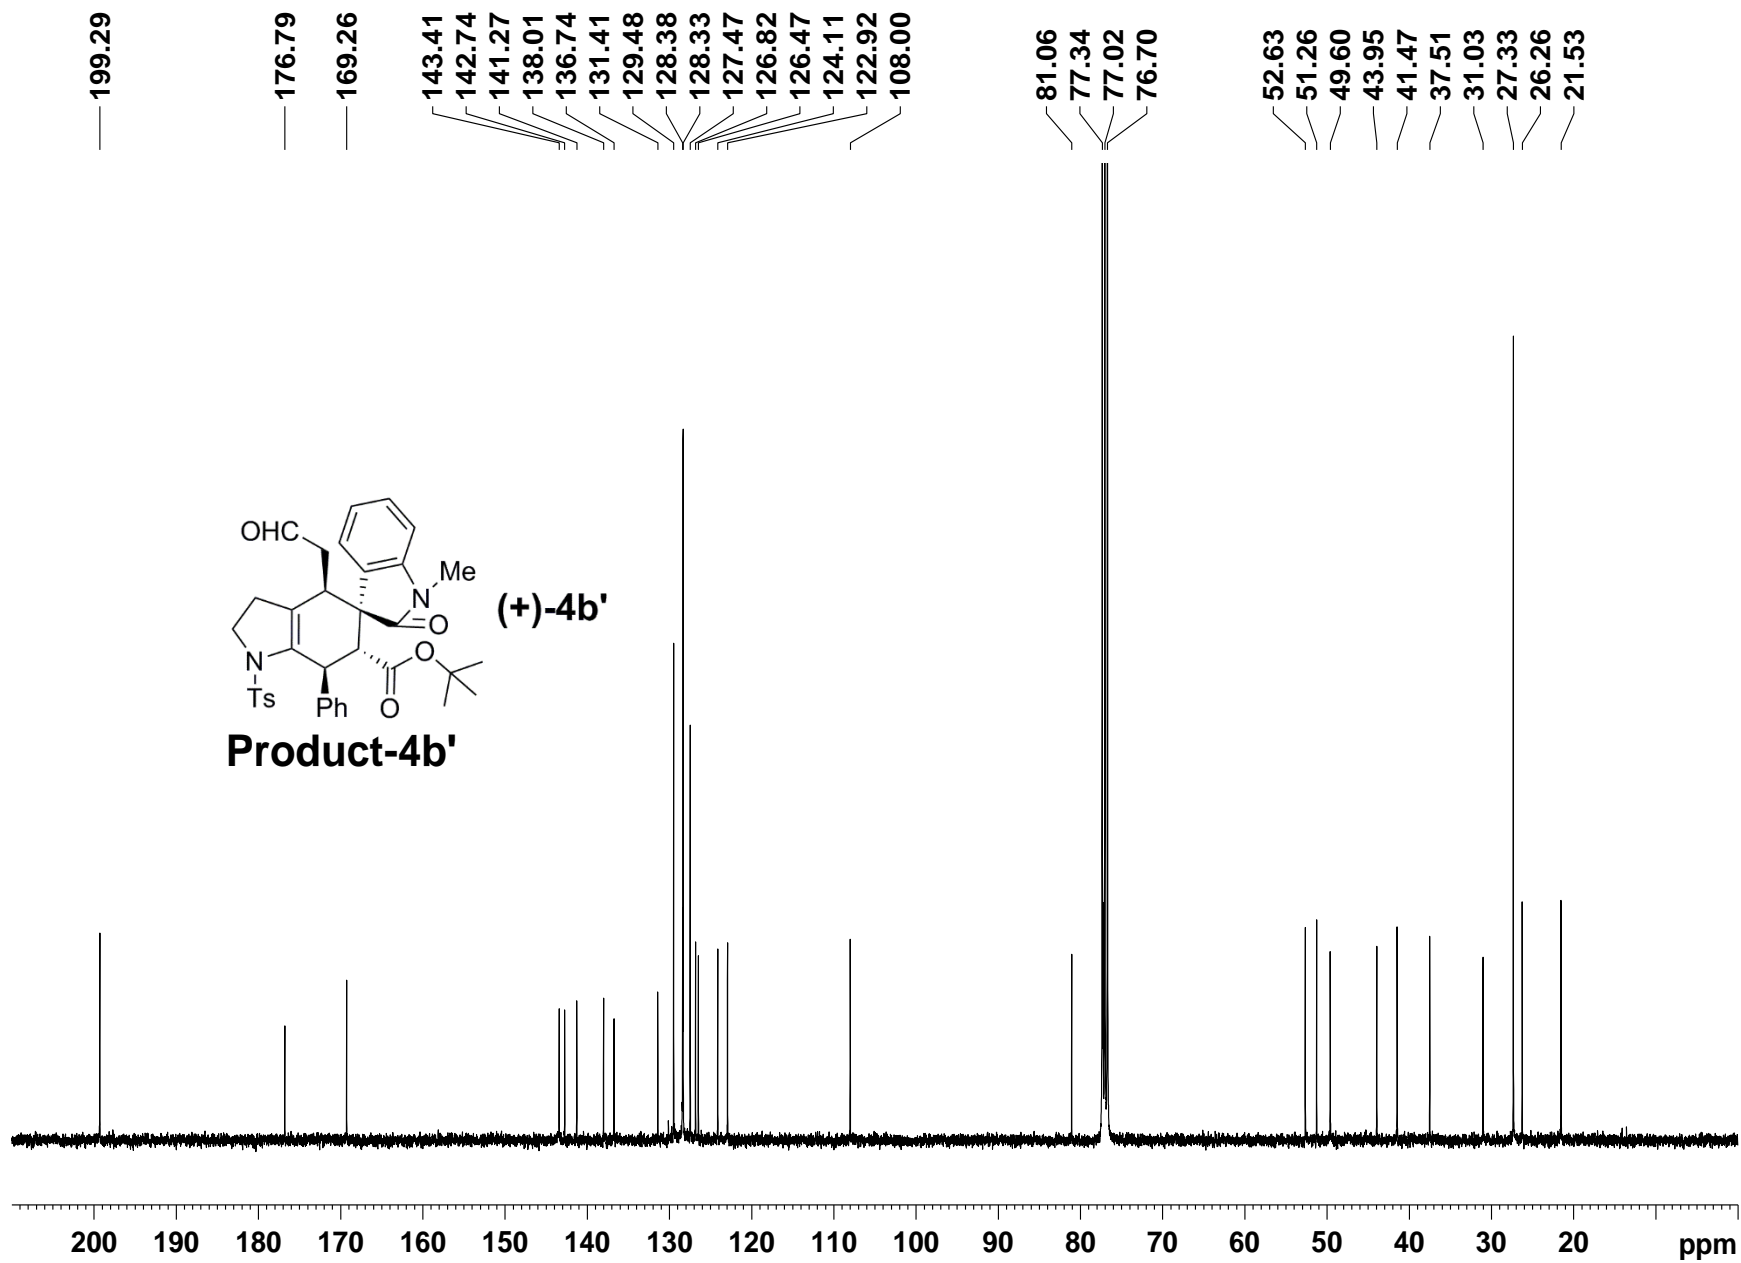

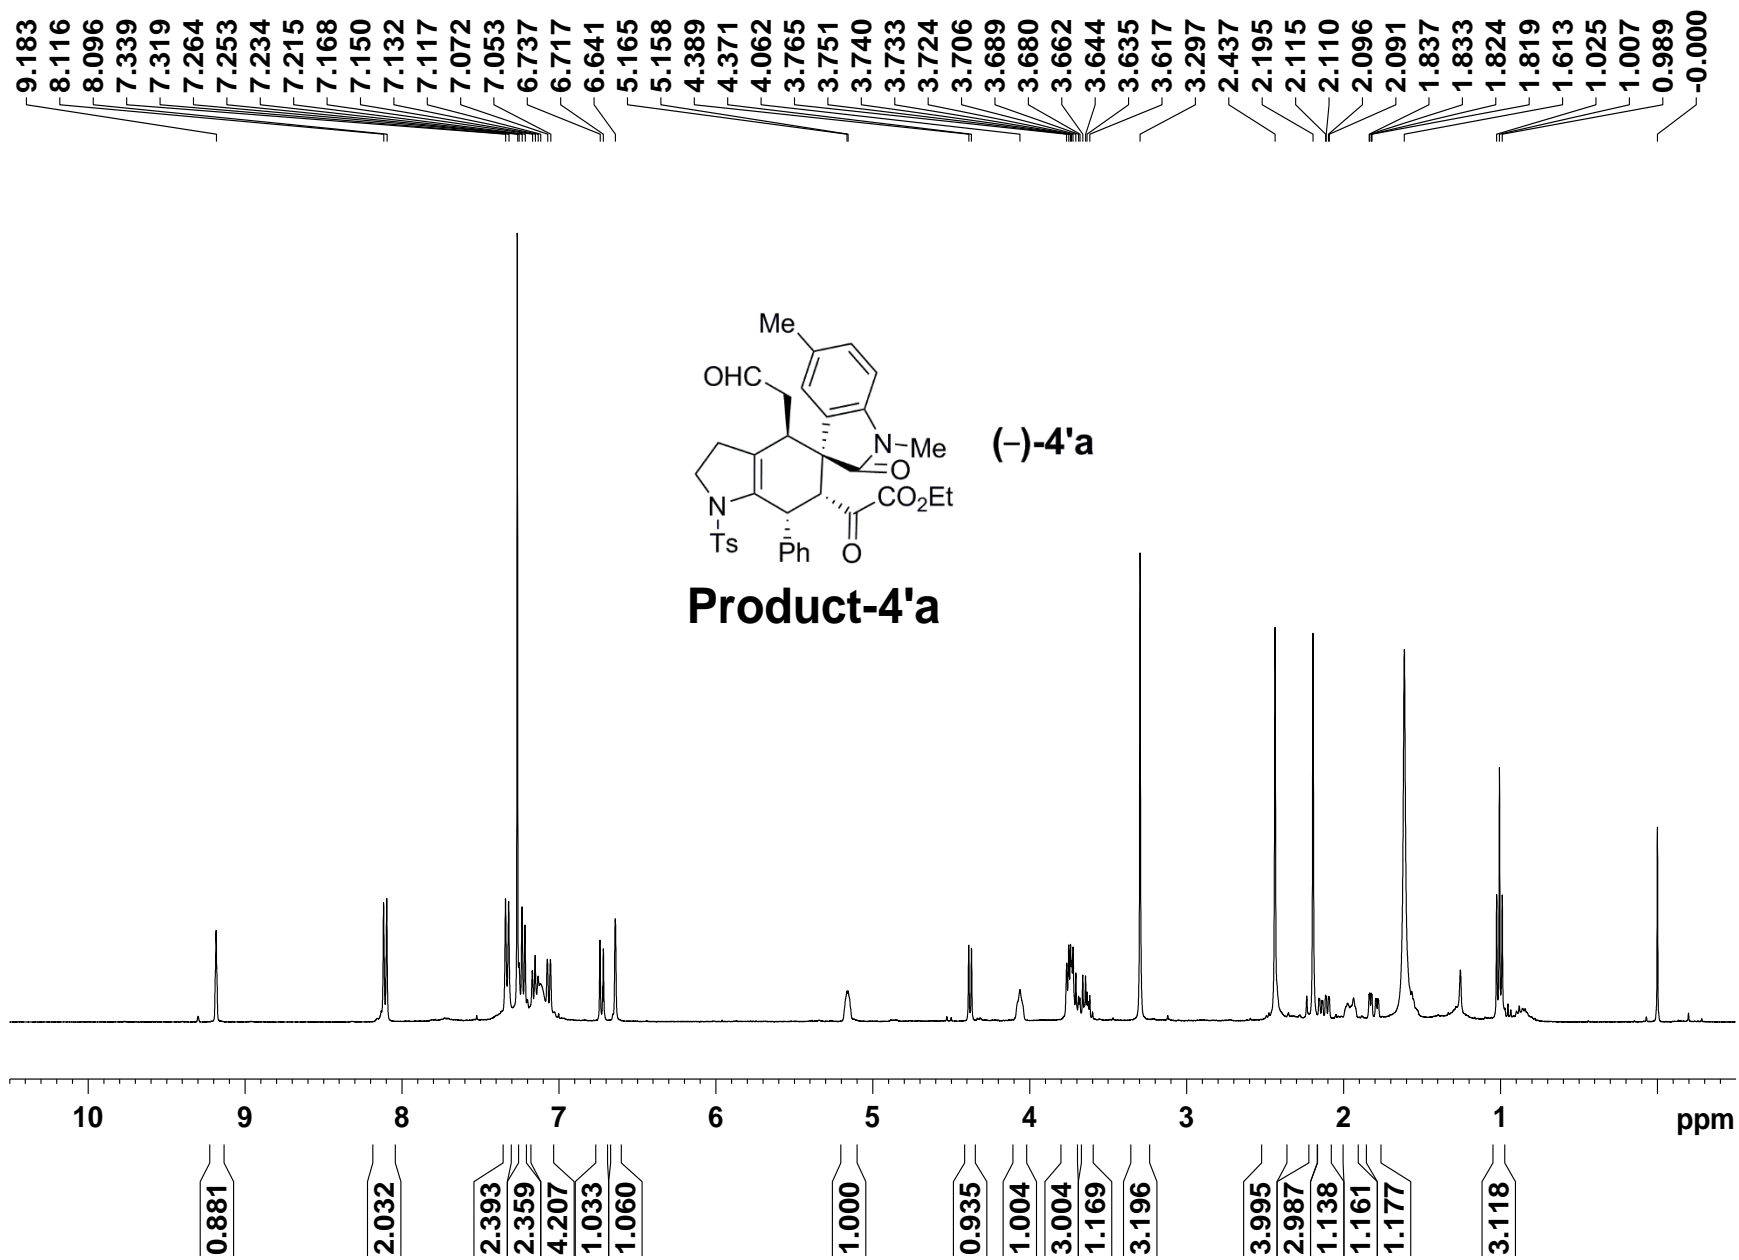

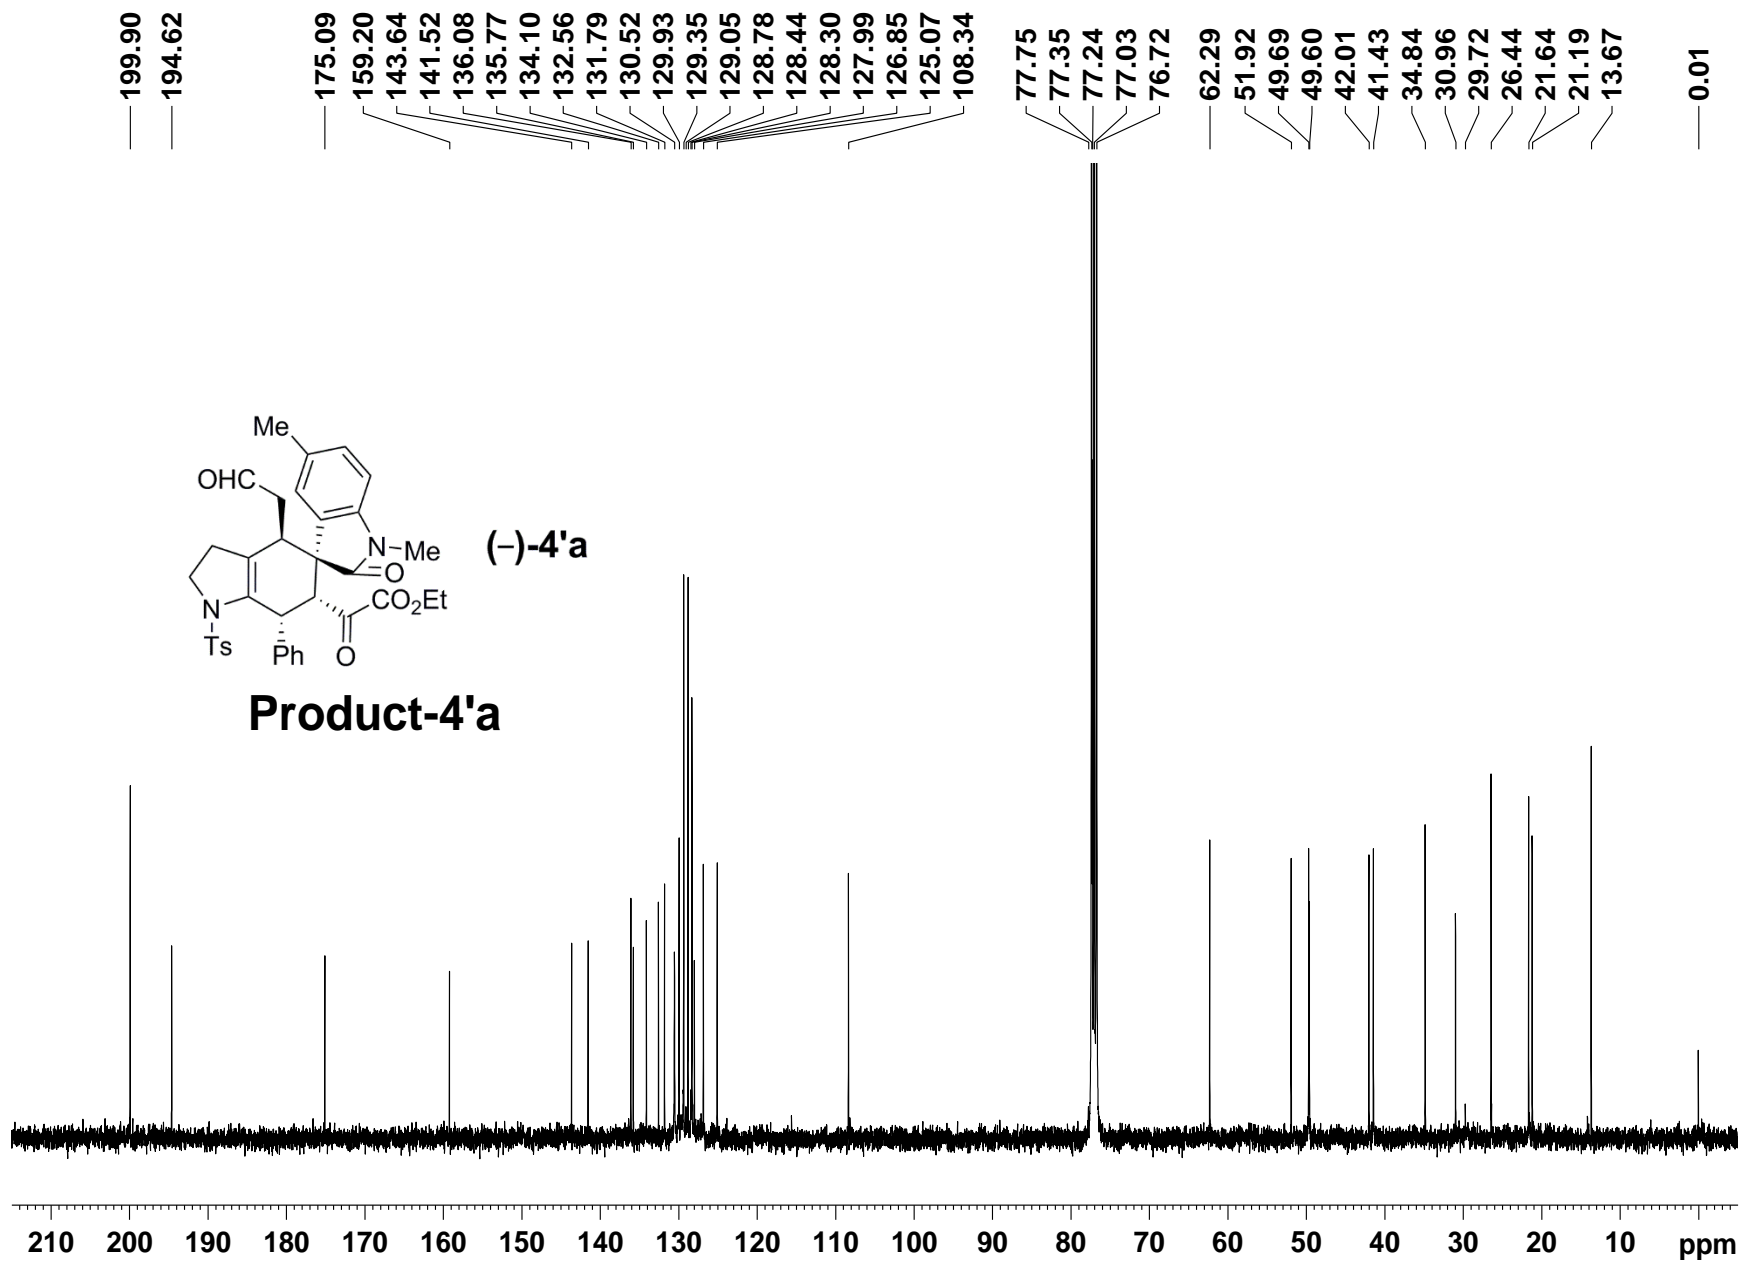

8.117  
8.097

7.117

5.166

4.389  
4.370

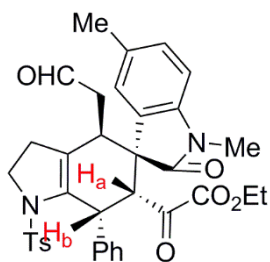

**NOE of 4'a**

**NOE of H<sub>a</sub> at  
4.38 ppm**

**irradiation of H<sub>b</sub> at  
5.18 ppm**

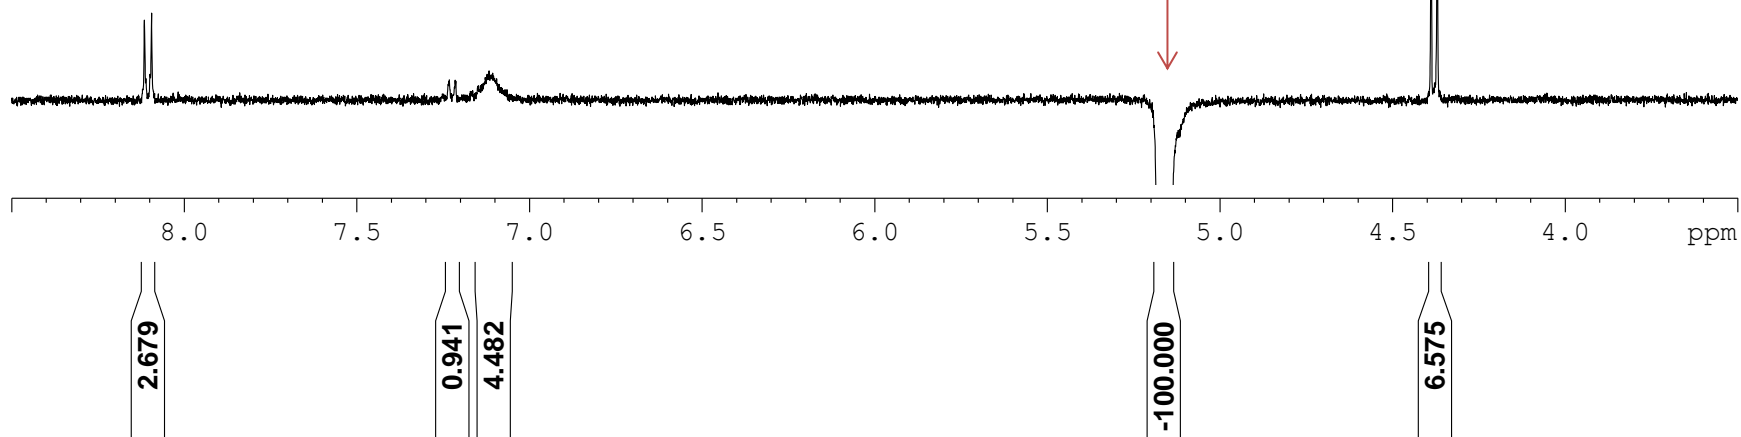

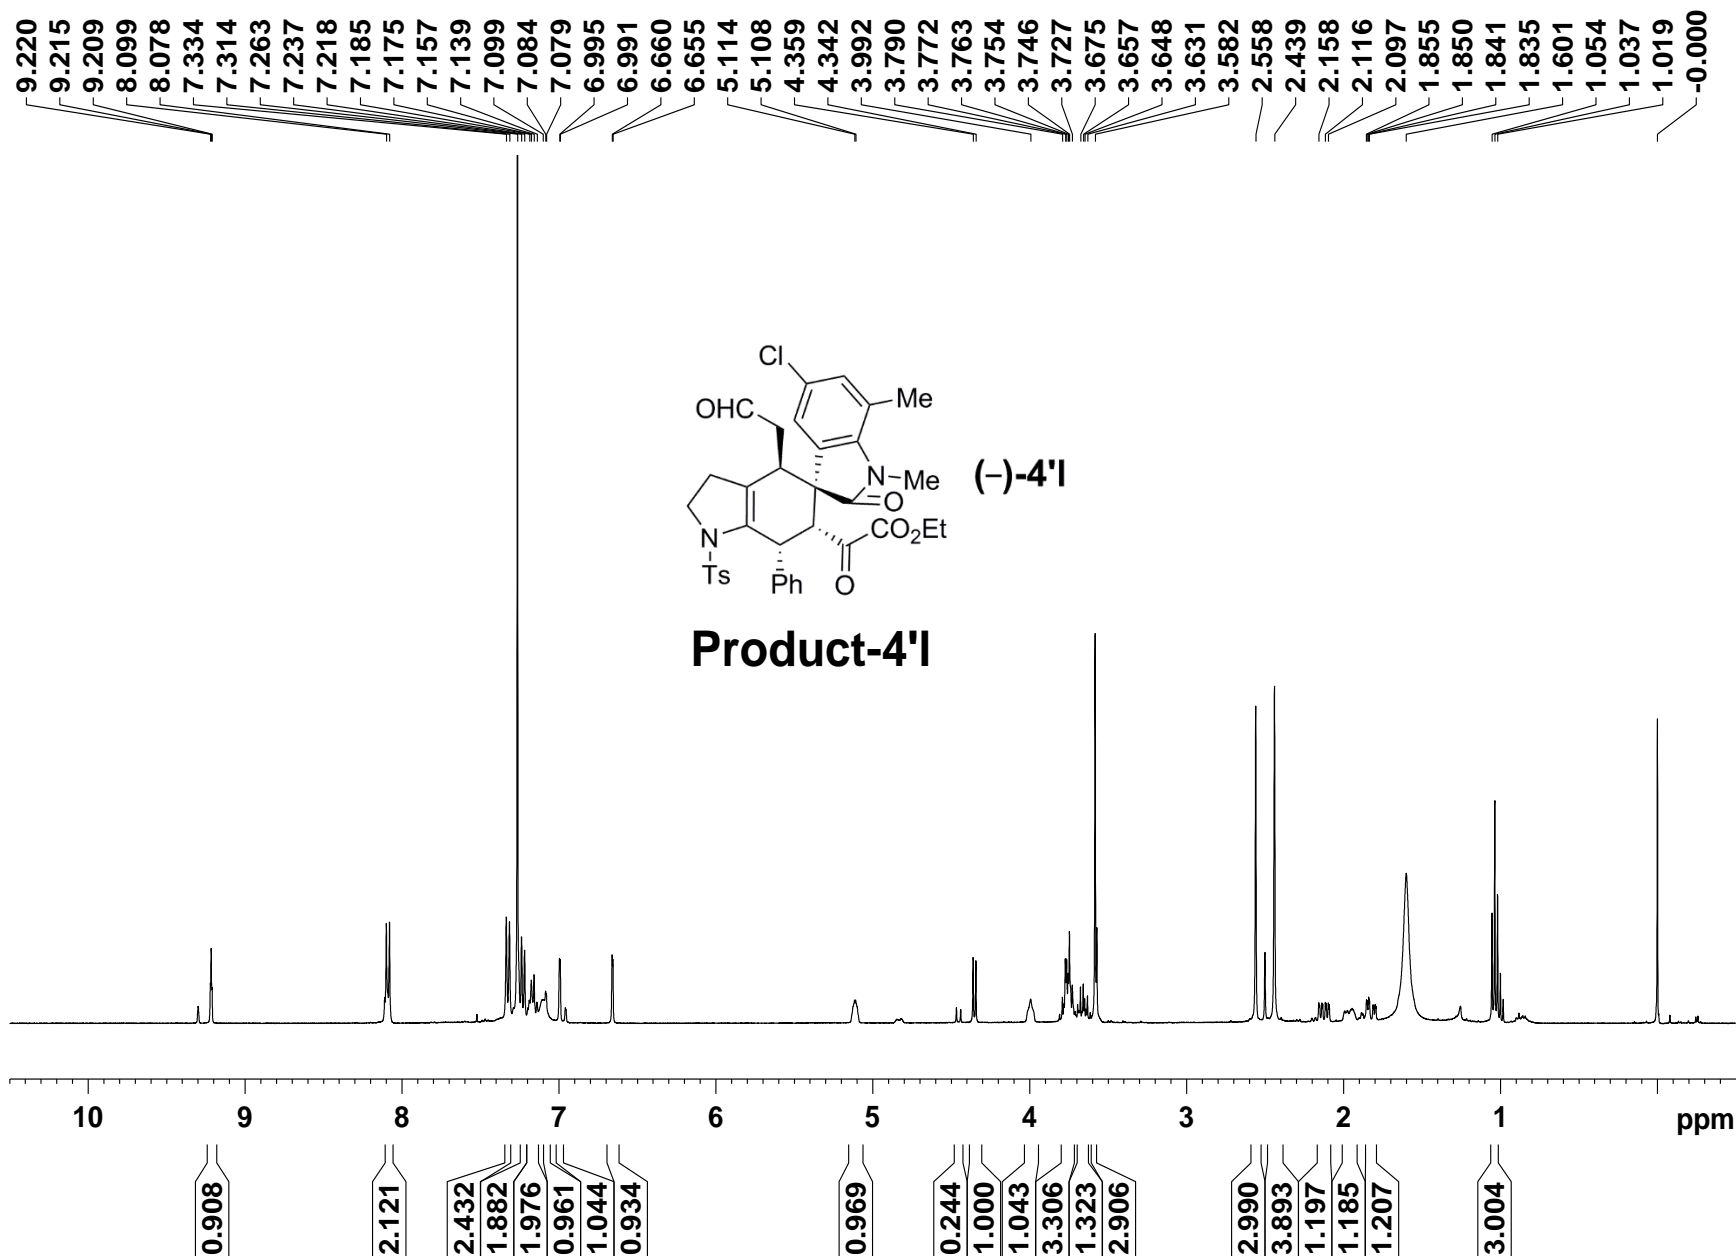

— 199.68  
— 194.44

— 175.36

159.33  
143.68  
140.36  
135.77  
134.10  
132.95  
131.48  
130.51  
130.25  
129.34  
128.79  
128.75  
128.34  
127.79  
126.93  
122.37  
121.74

77.33  
77.02  
76.70

— 62.46  
51.47  
49.63  
49.58  
41.94  
41.42  
34.88  
30.91  
29.78  
21.63  
19.01  
13.65

— -0.00

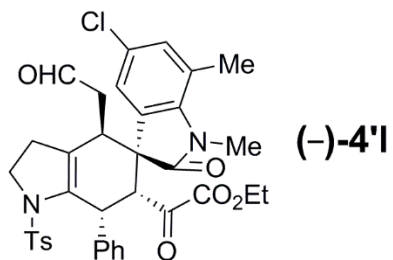

**Product-4'I**

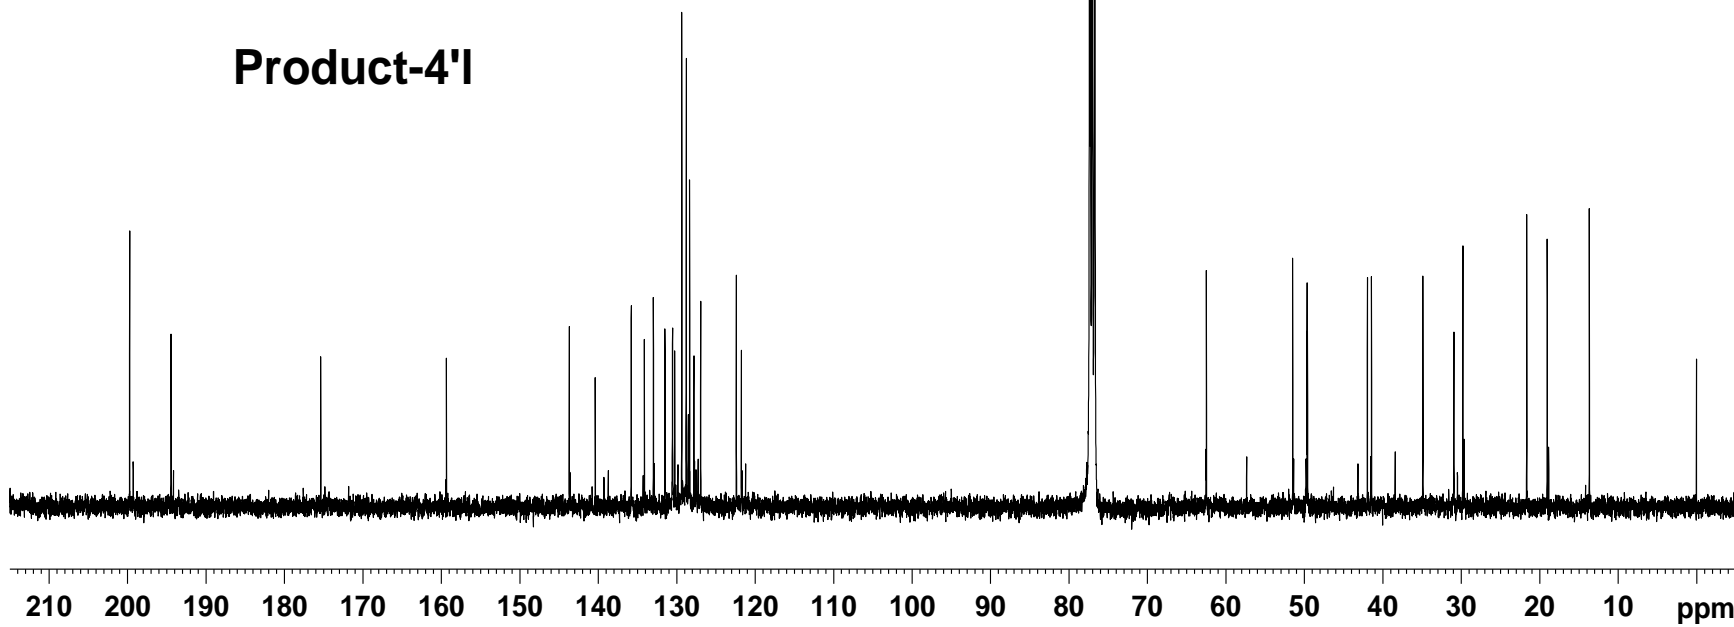

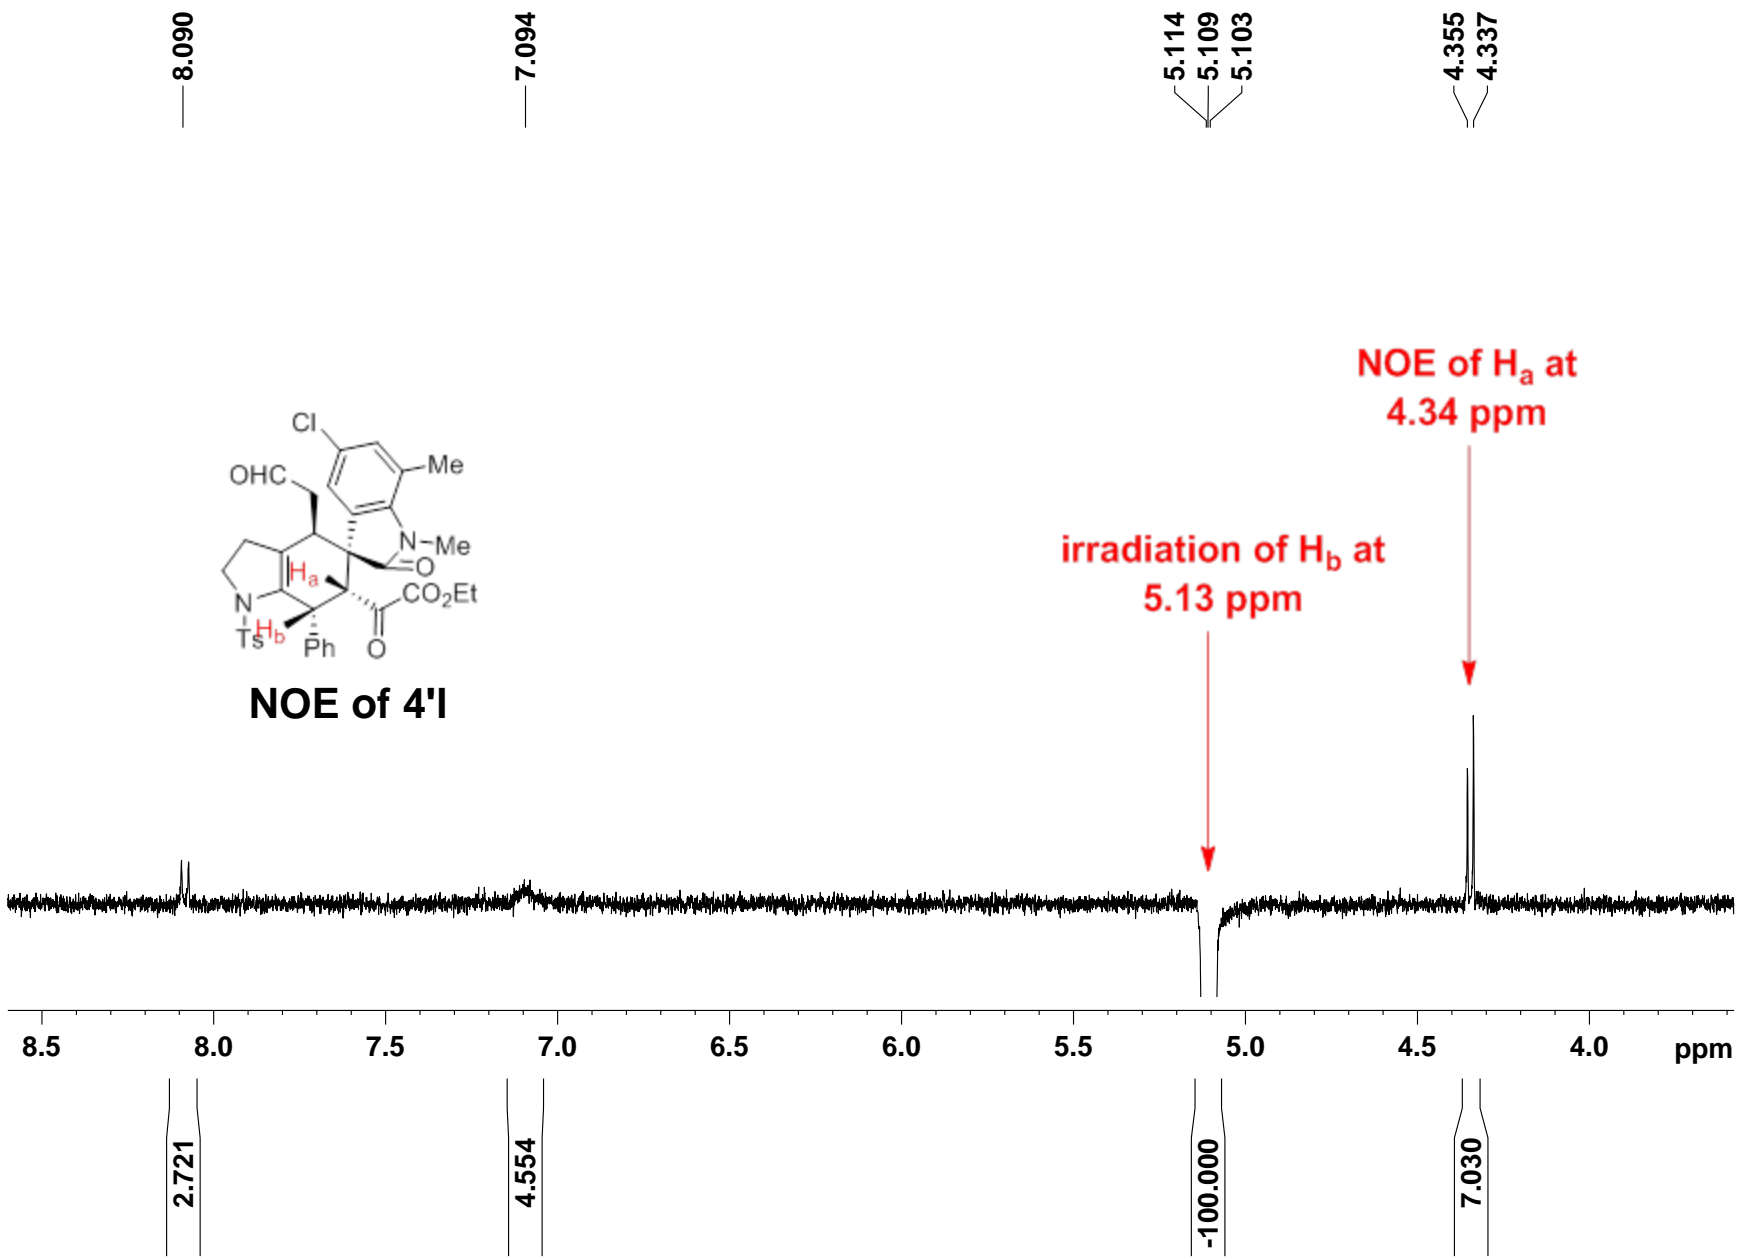

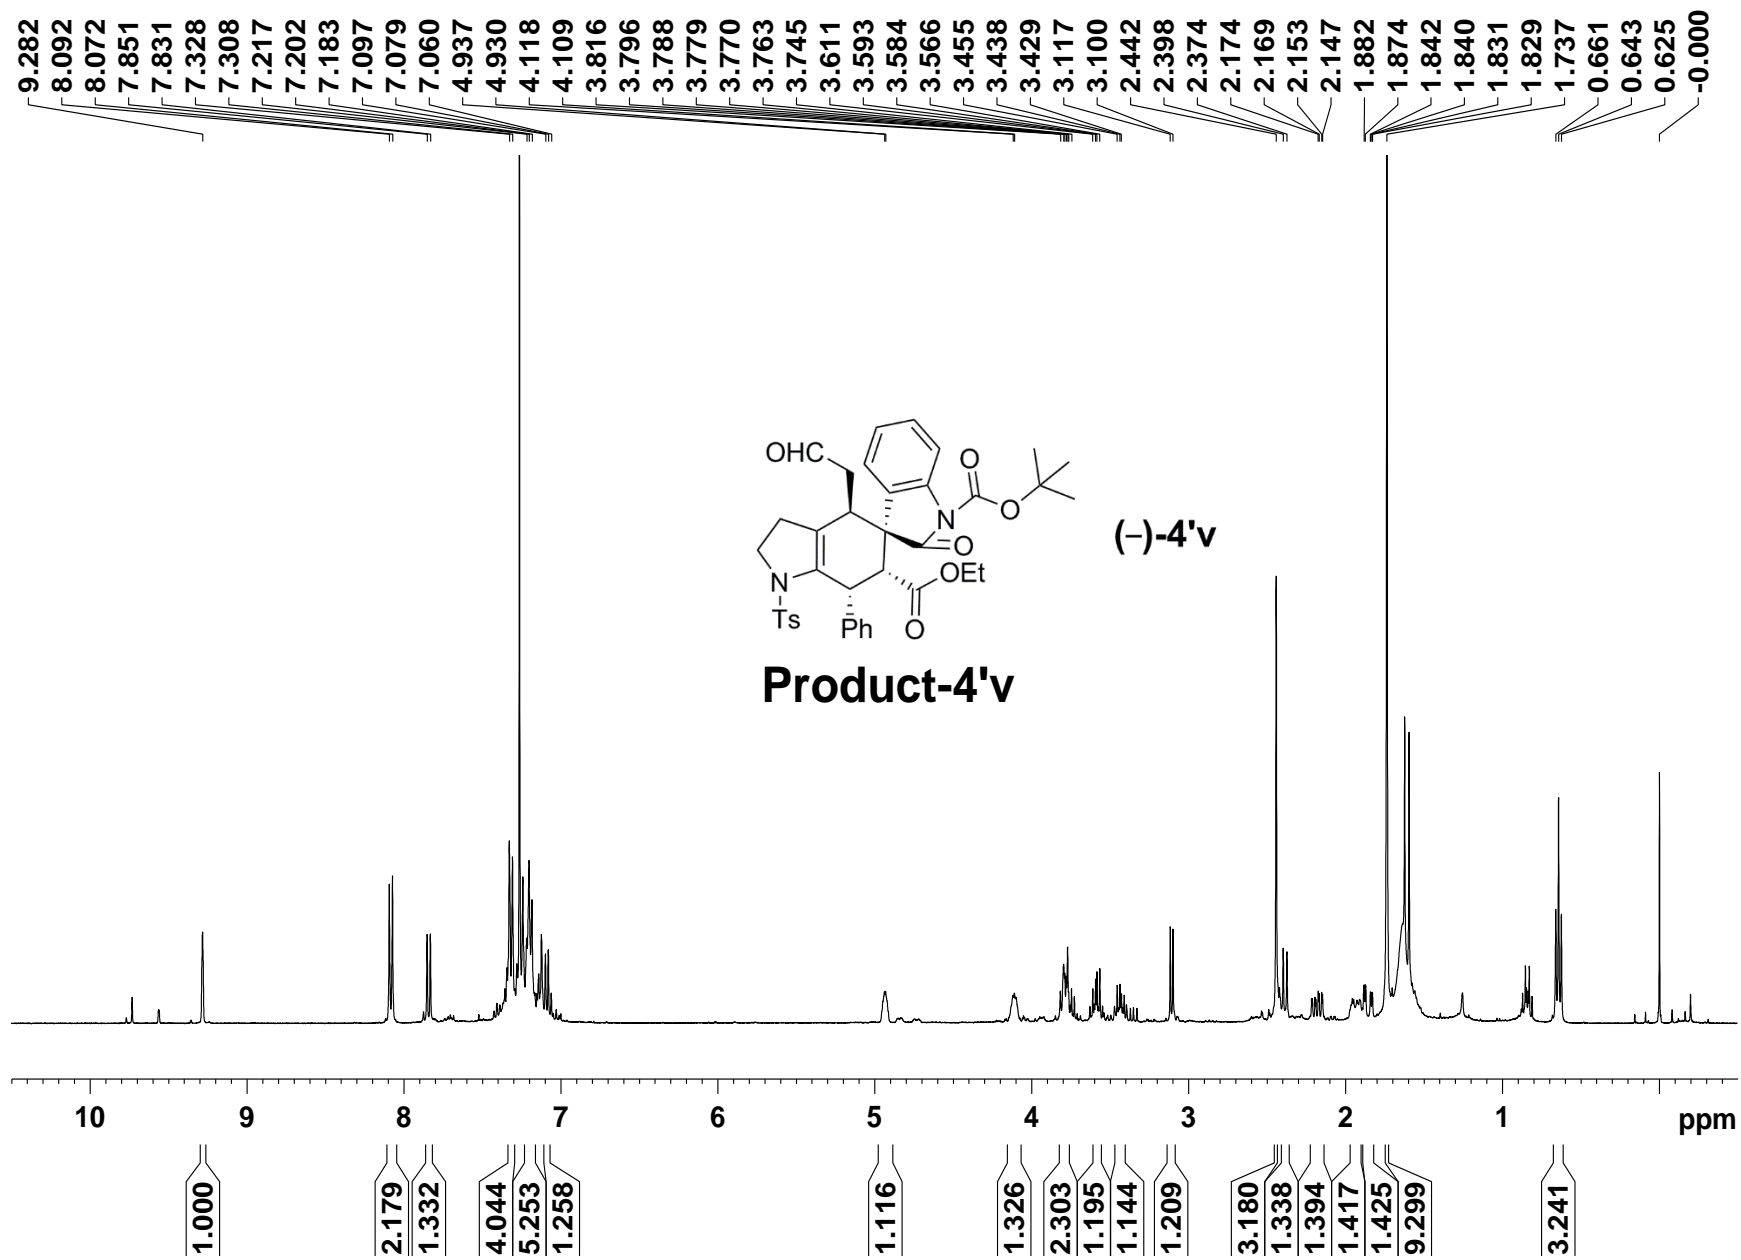



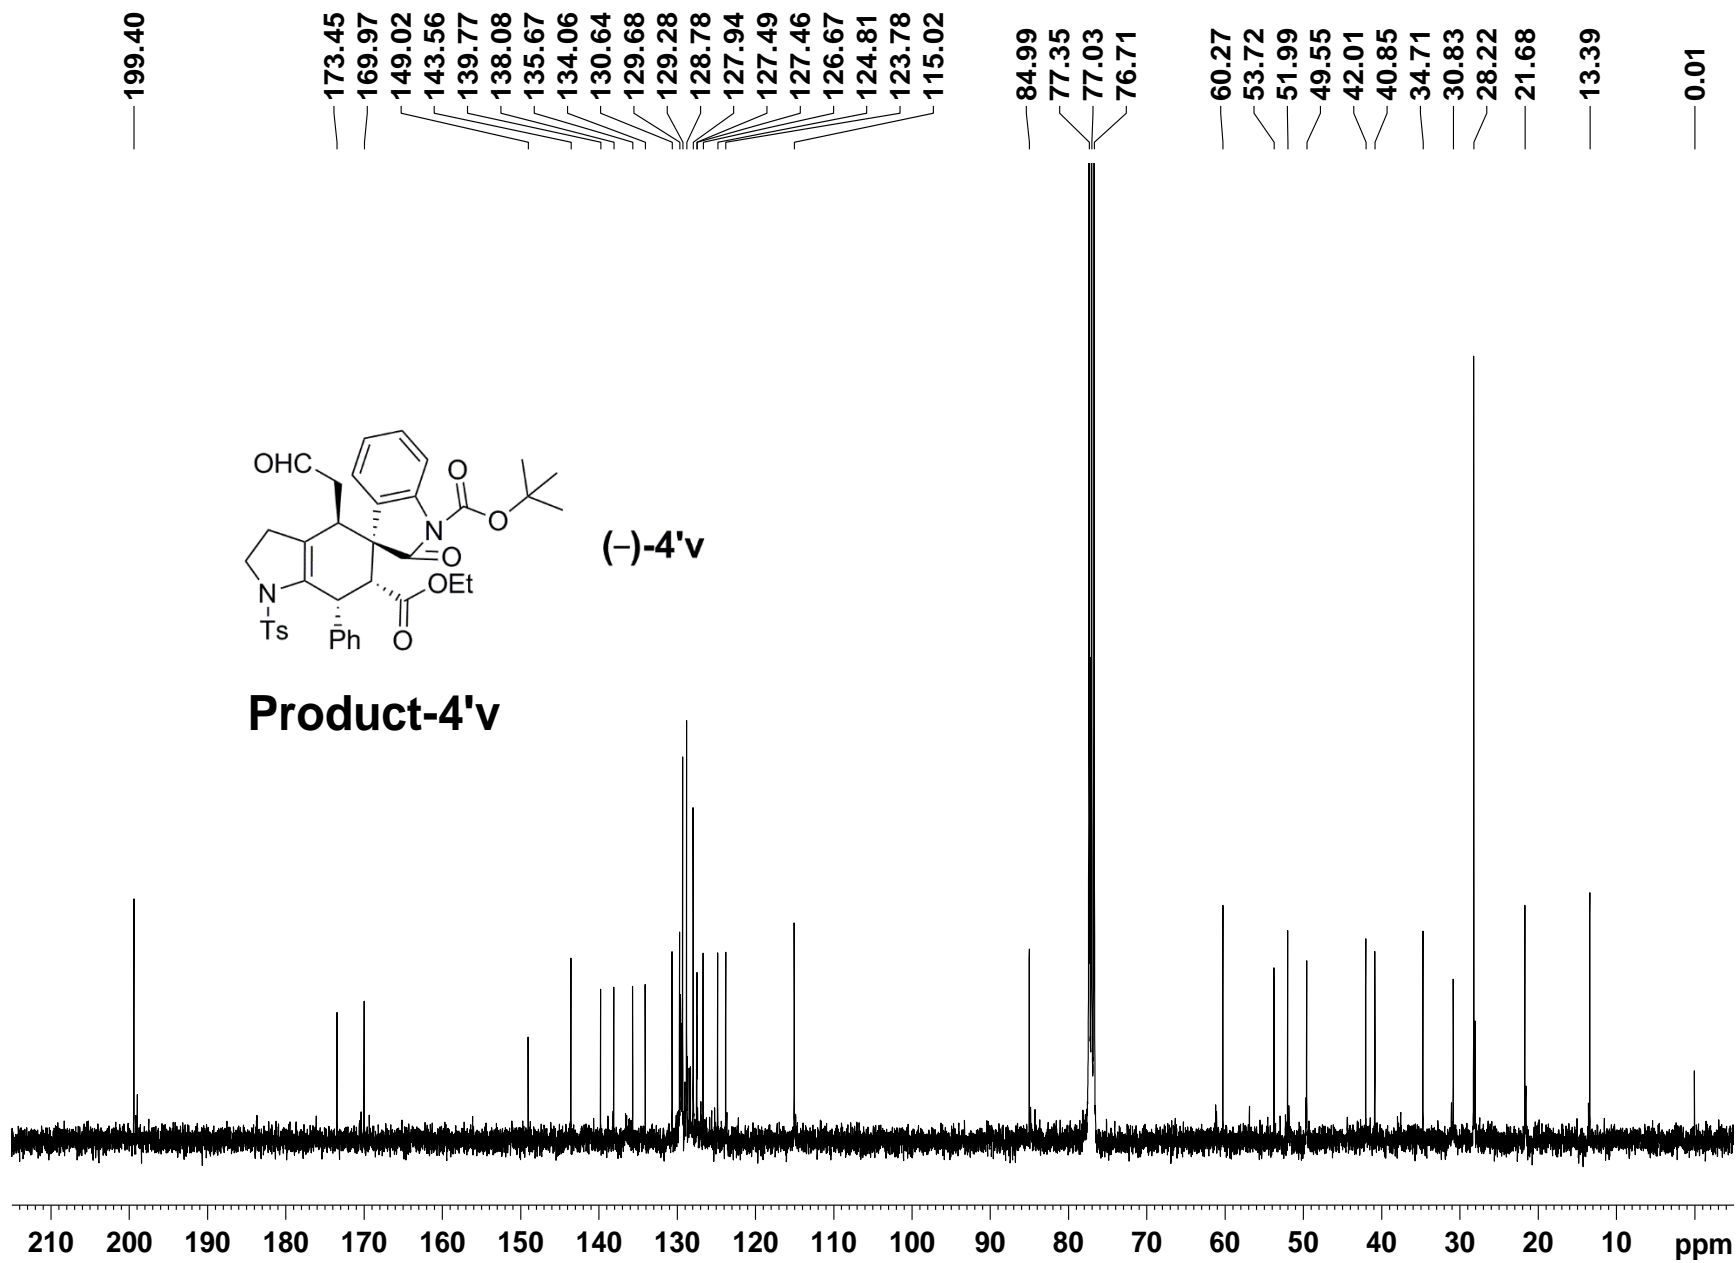

8.090  
8.069

7.198  
7.181

4.929

3.112  
3.095

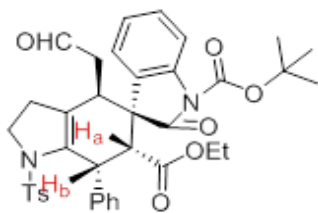

**NOE of 4'v**

irradiation of  $H_b$  at  
4.95 ppm

NOE of  $H_a$  at  
3.10 ppm

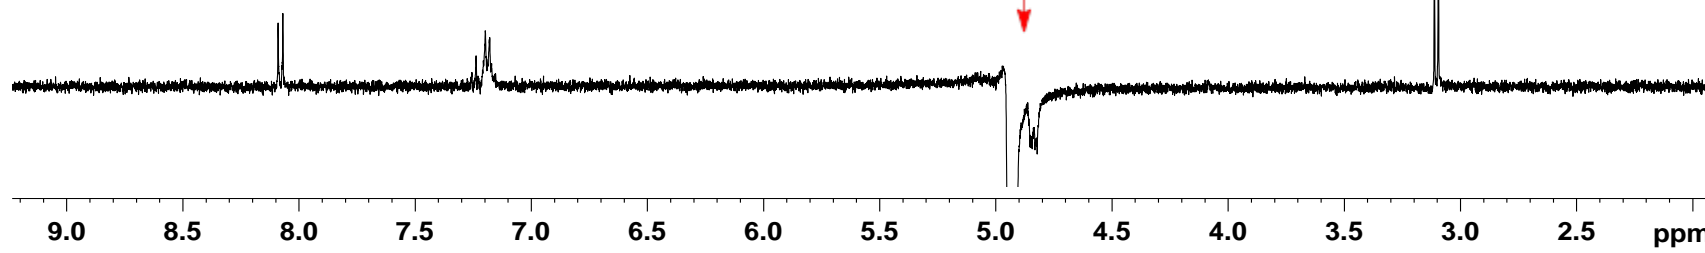

2.705

5.885

-100.000

6.617

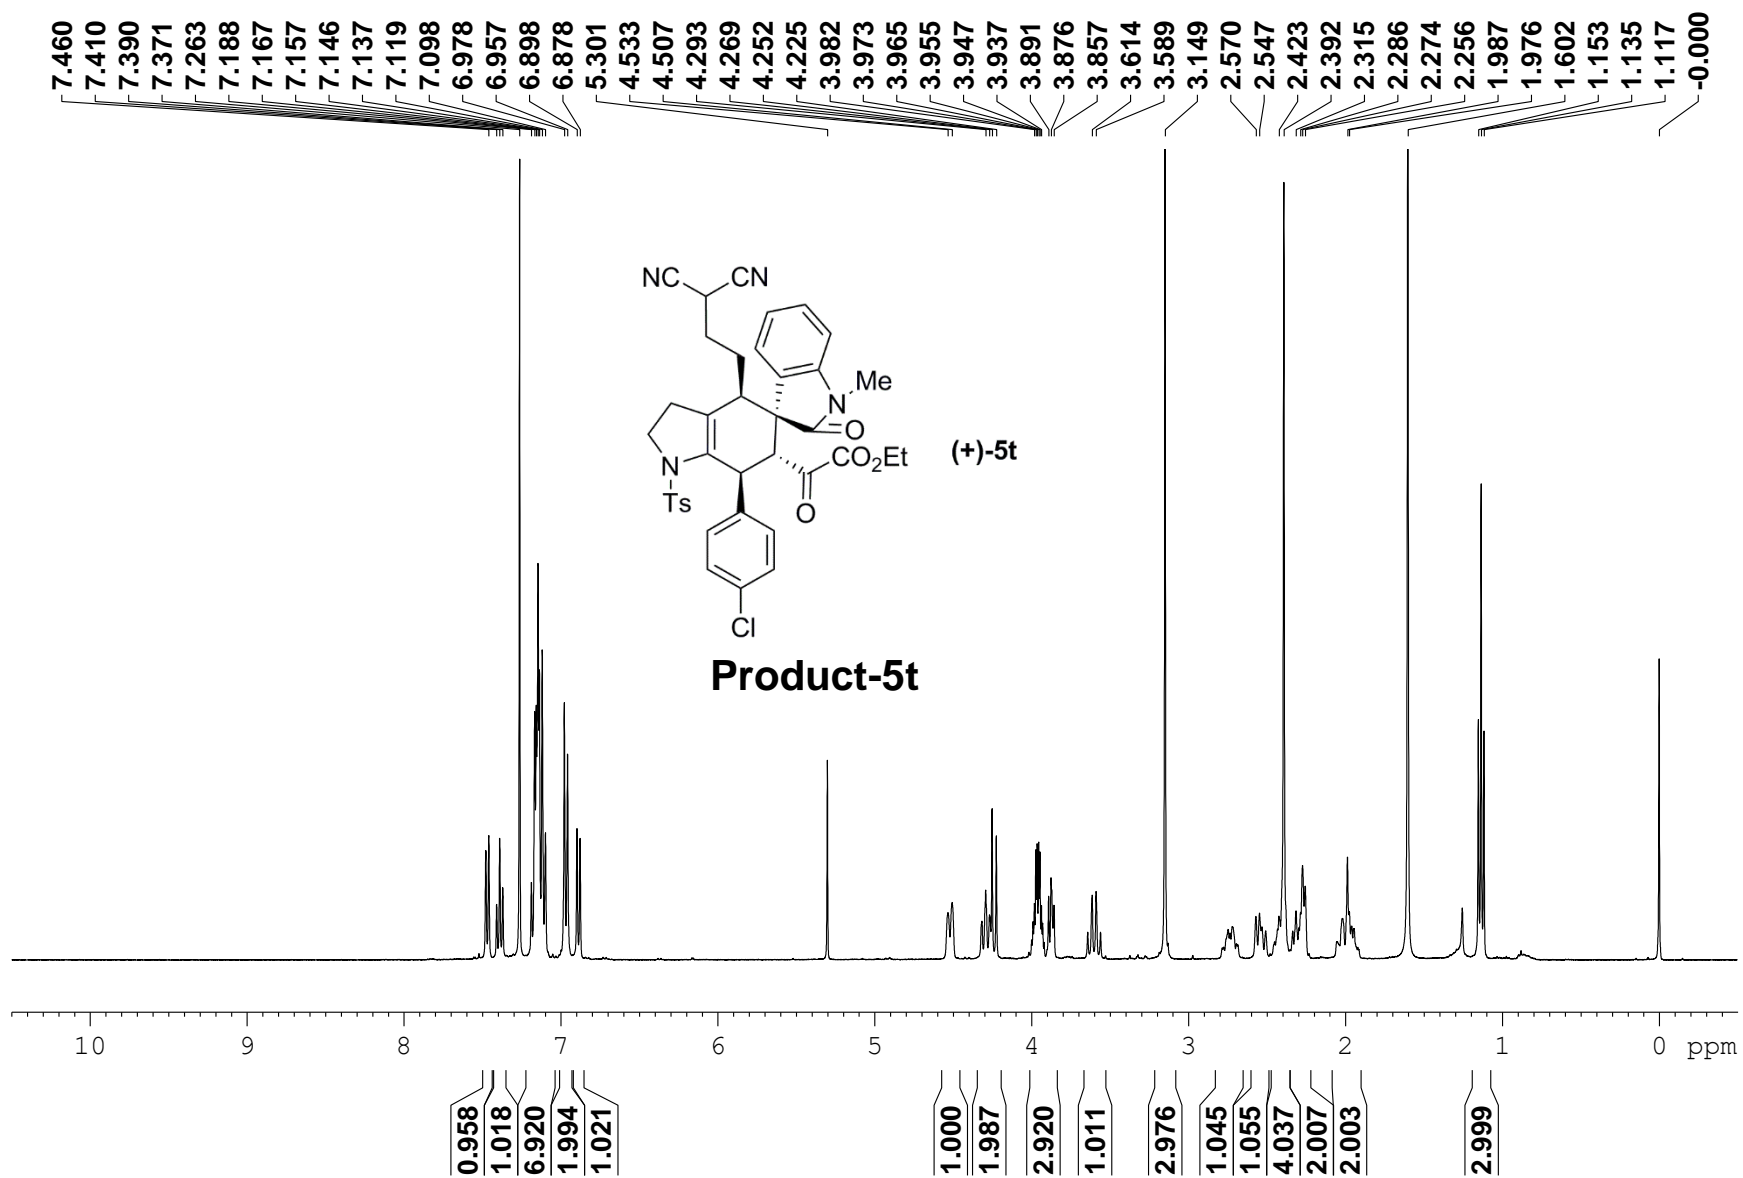

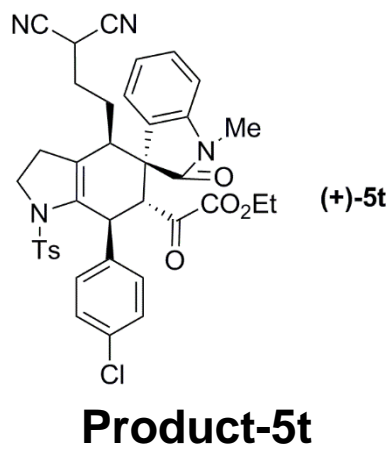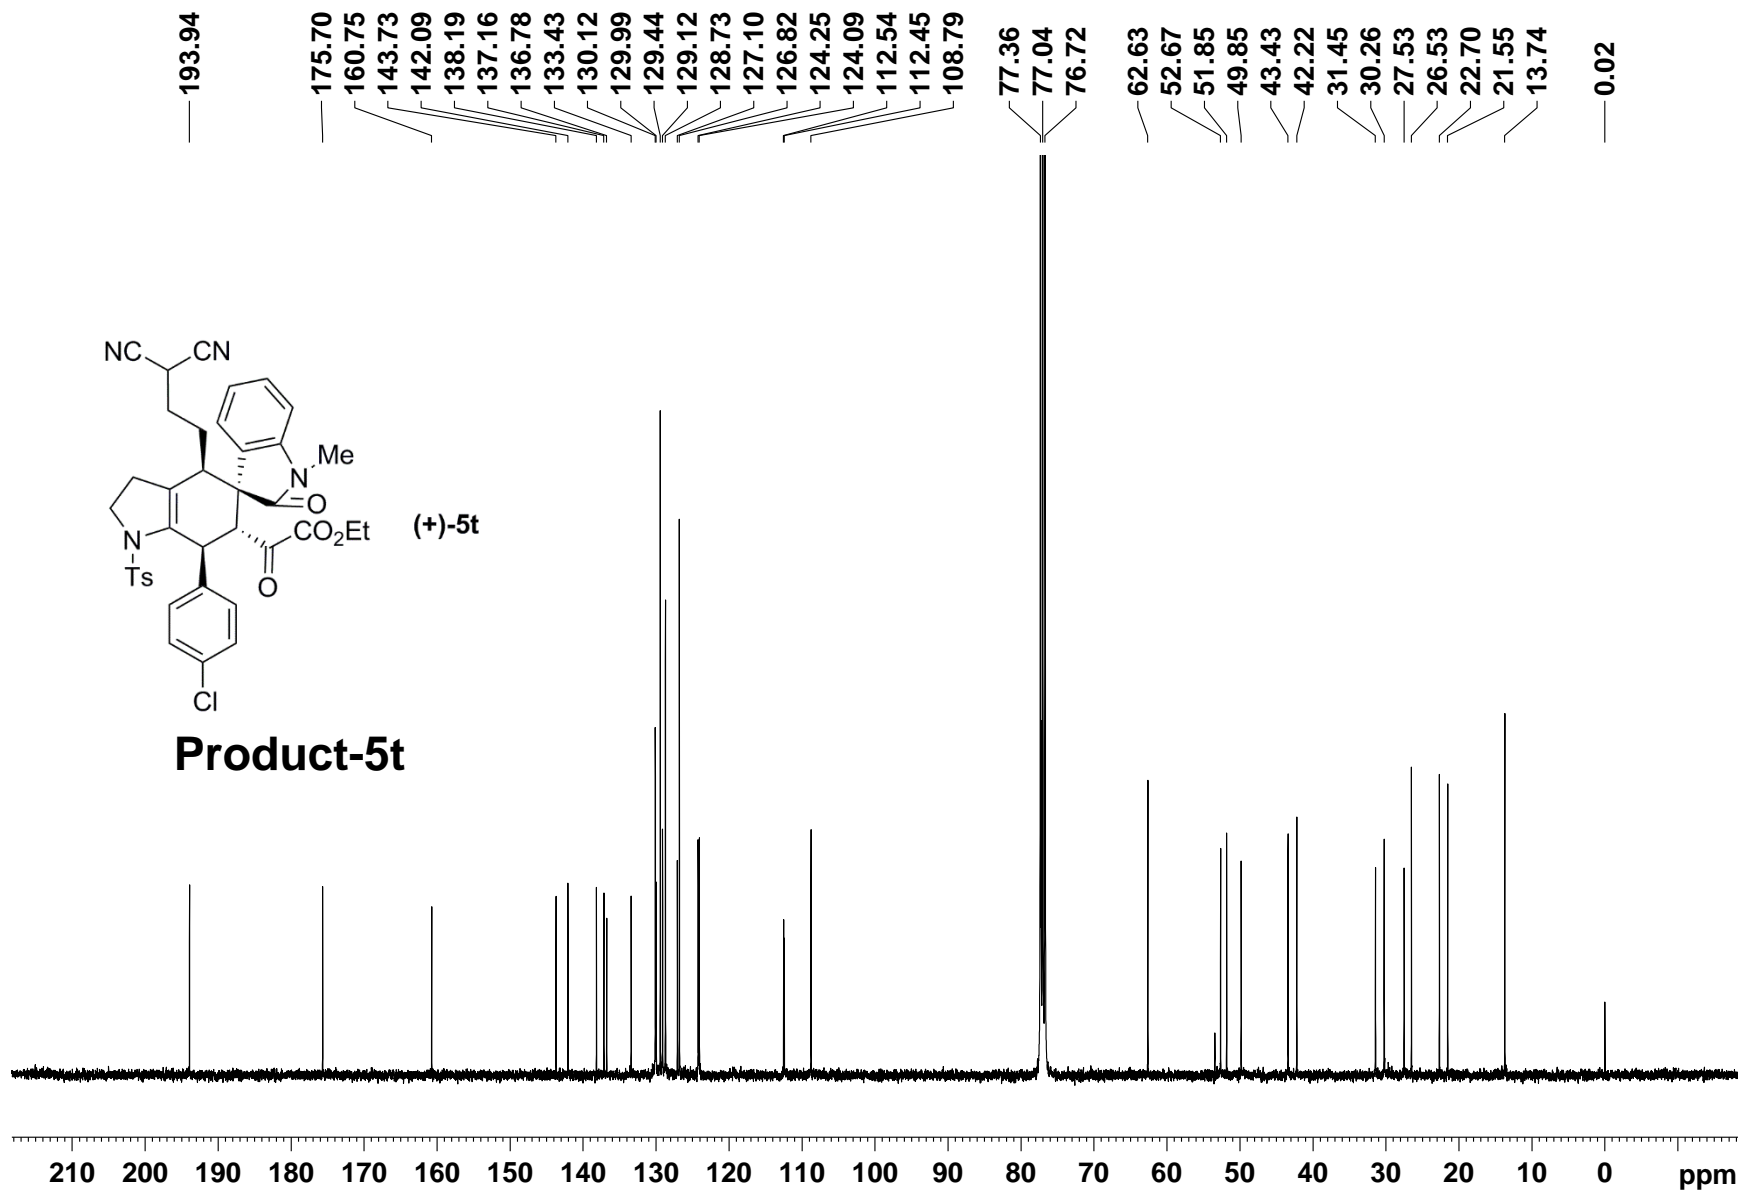

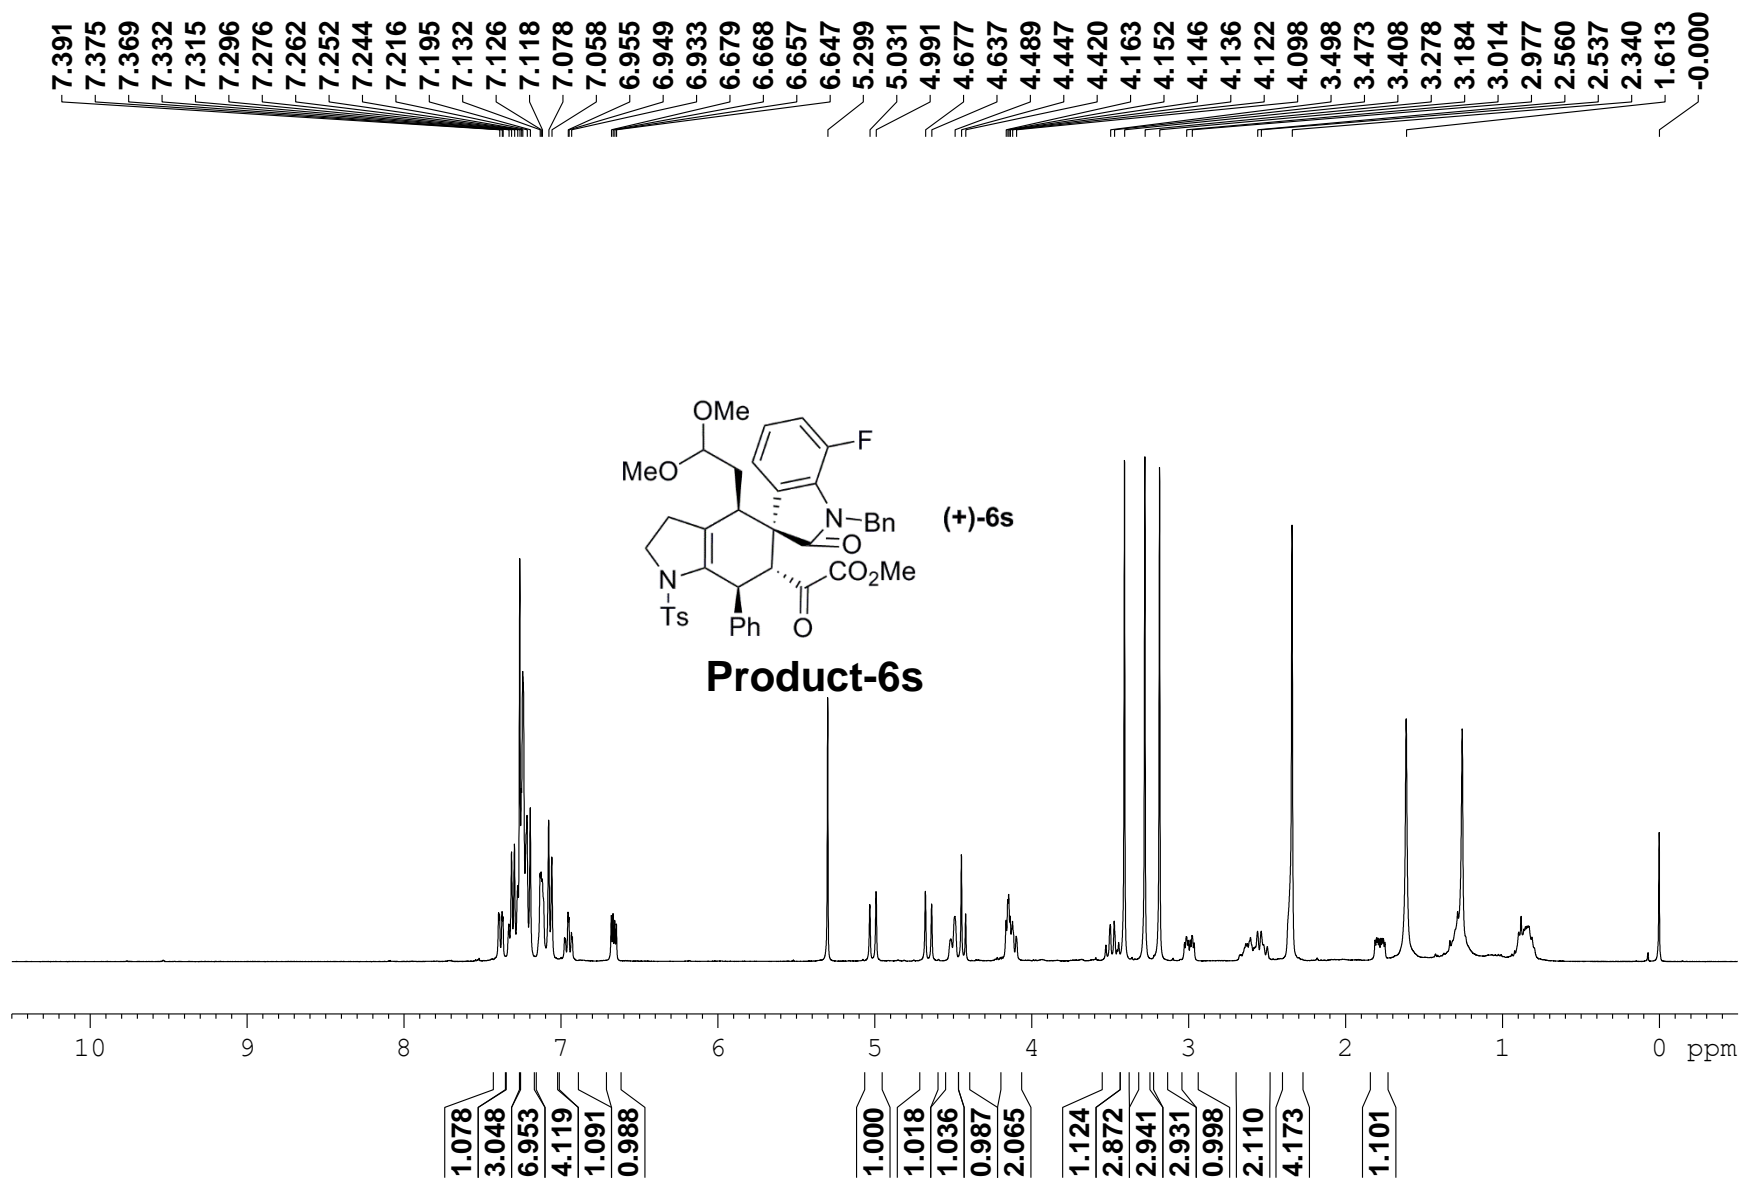

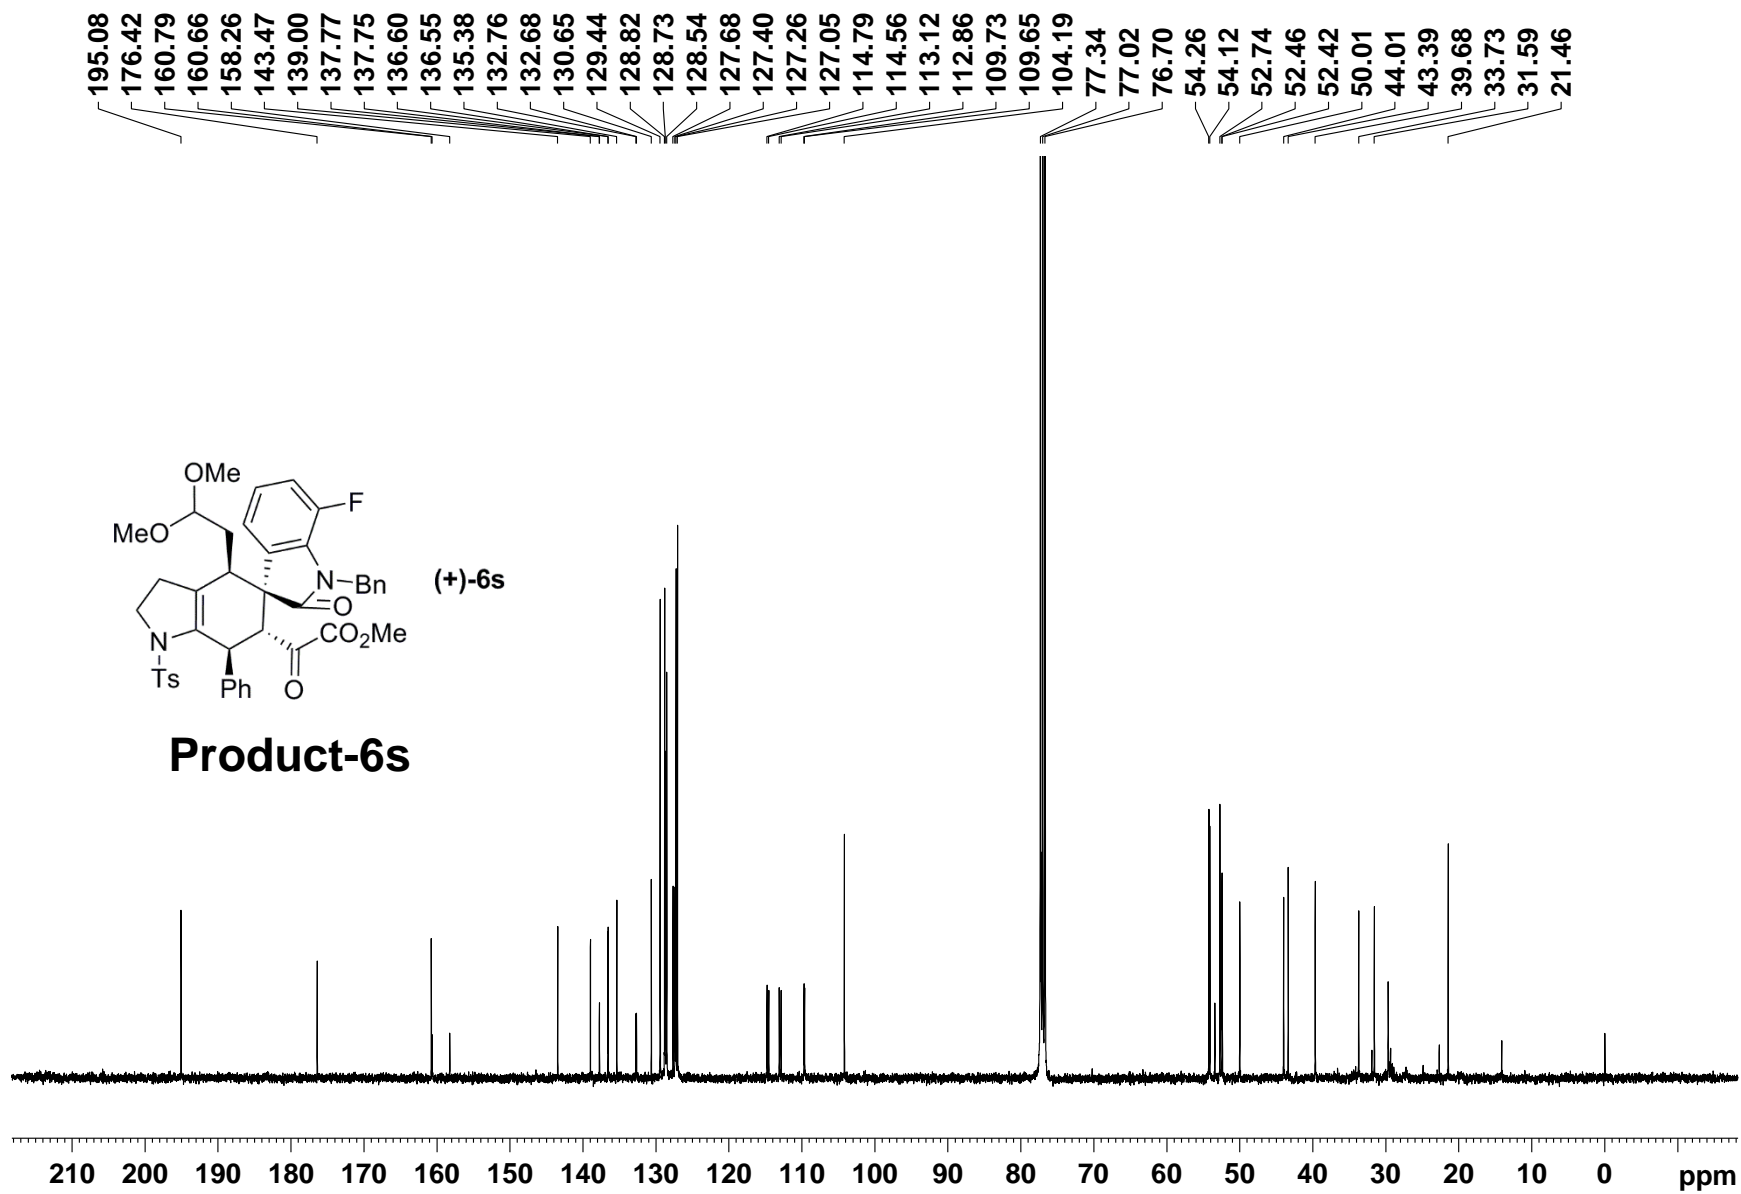

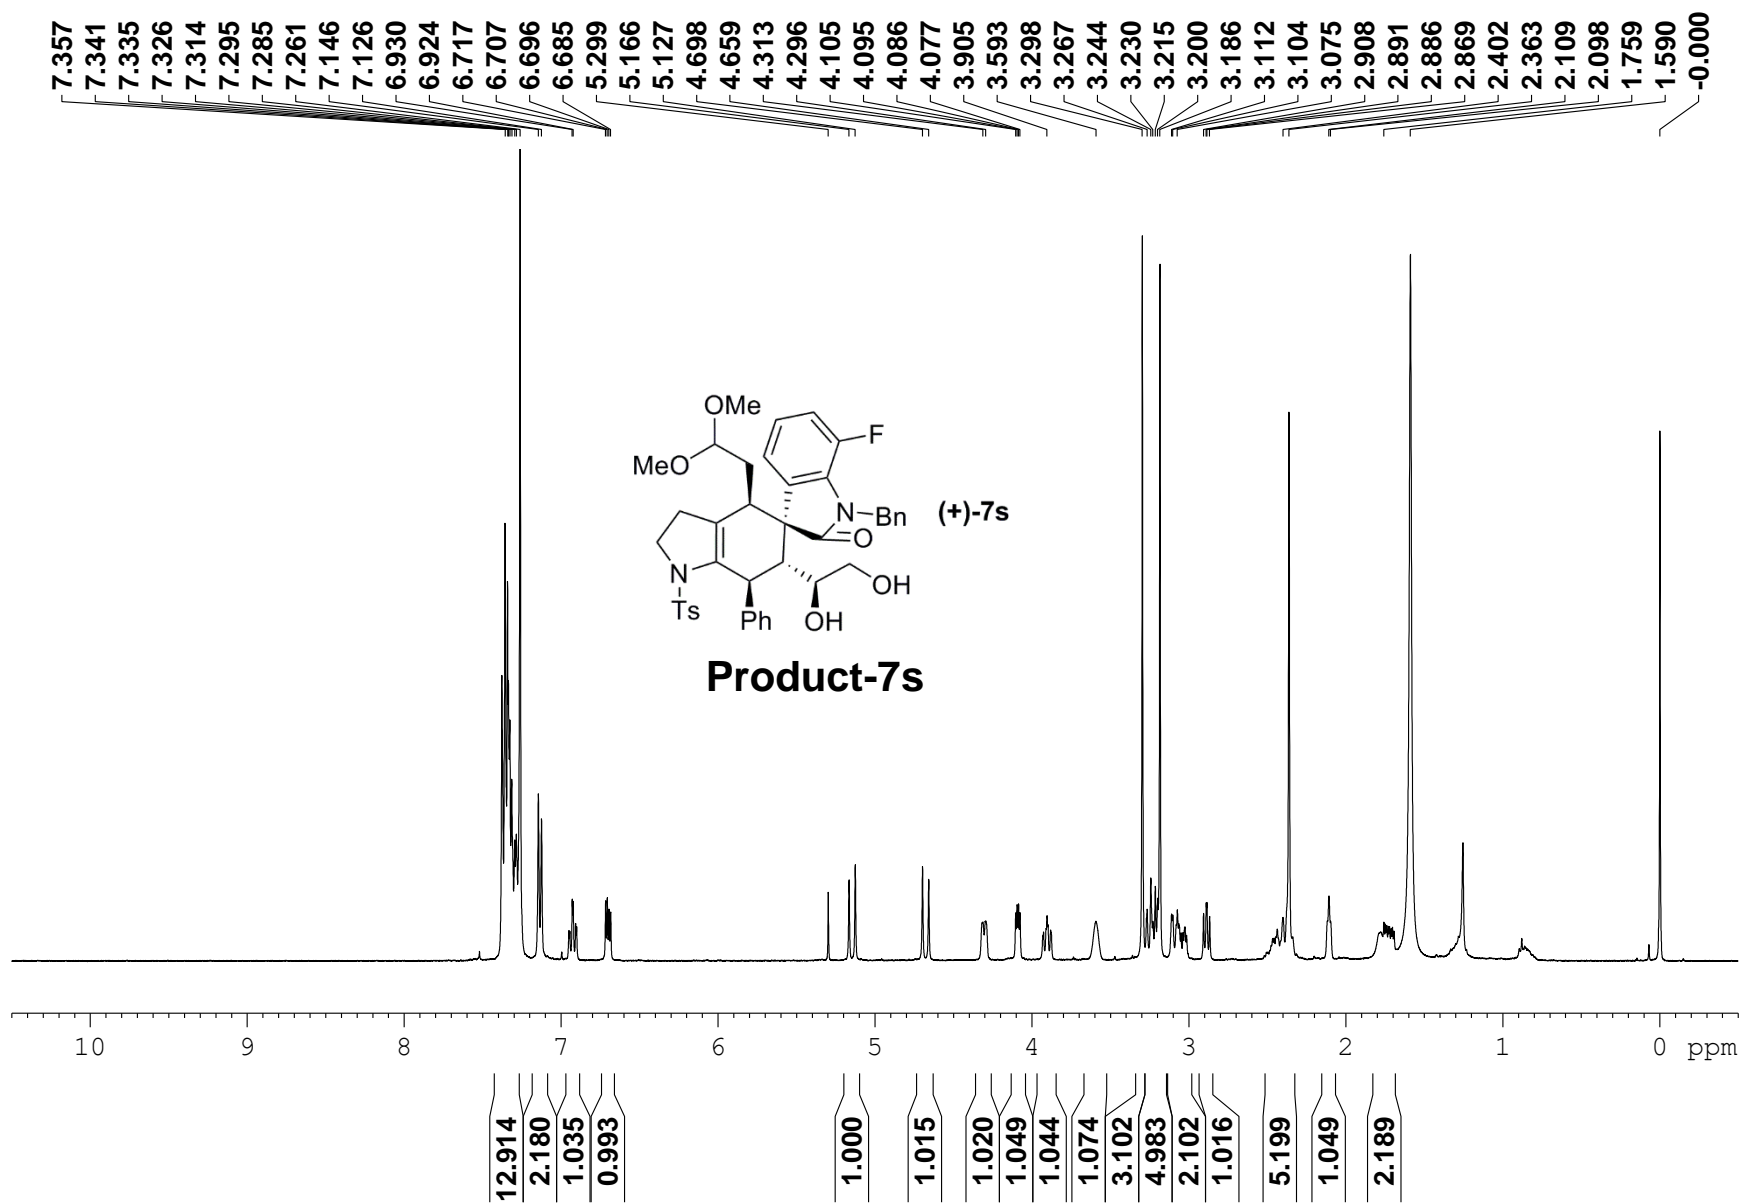

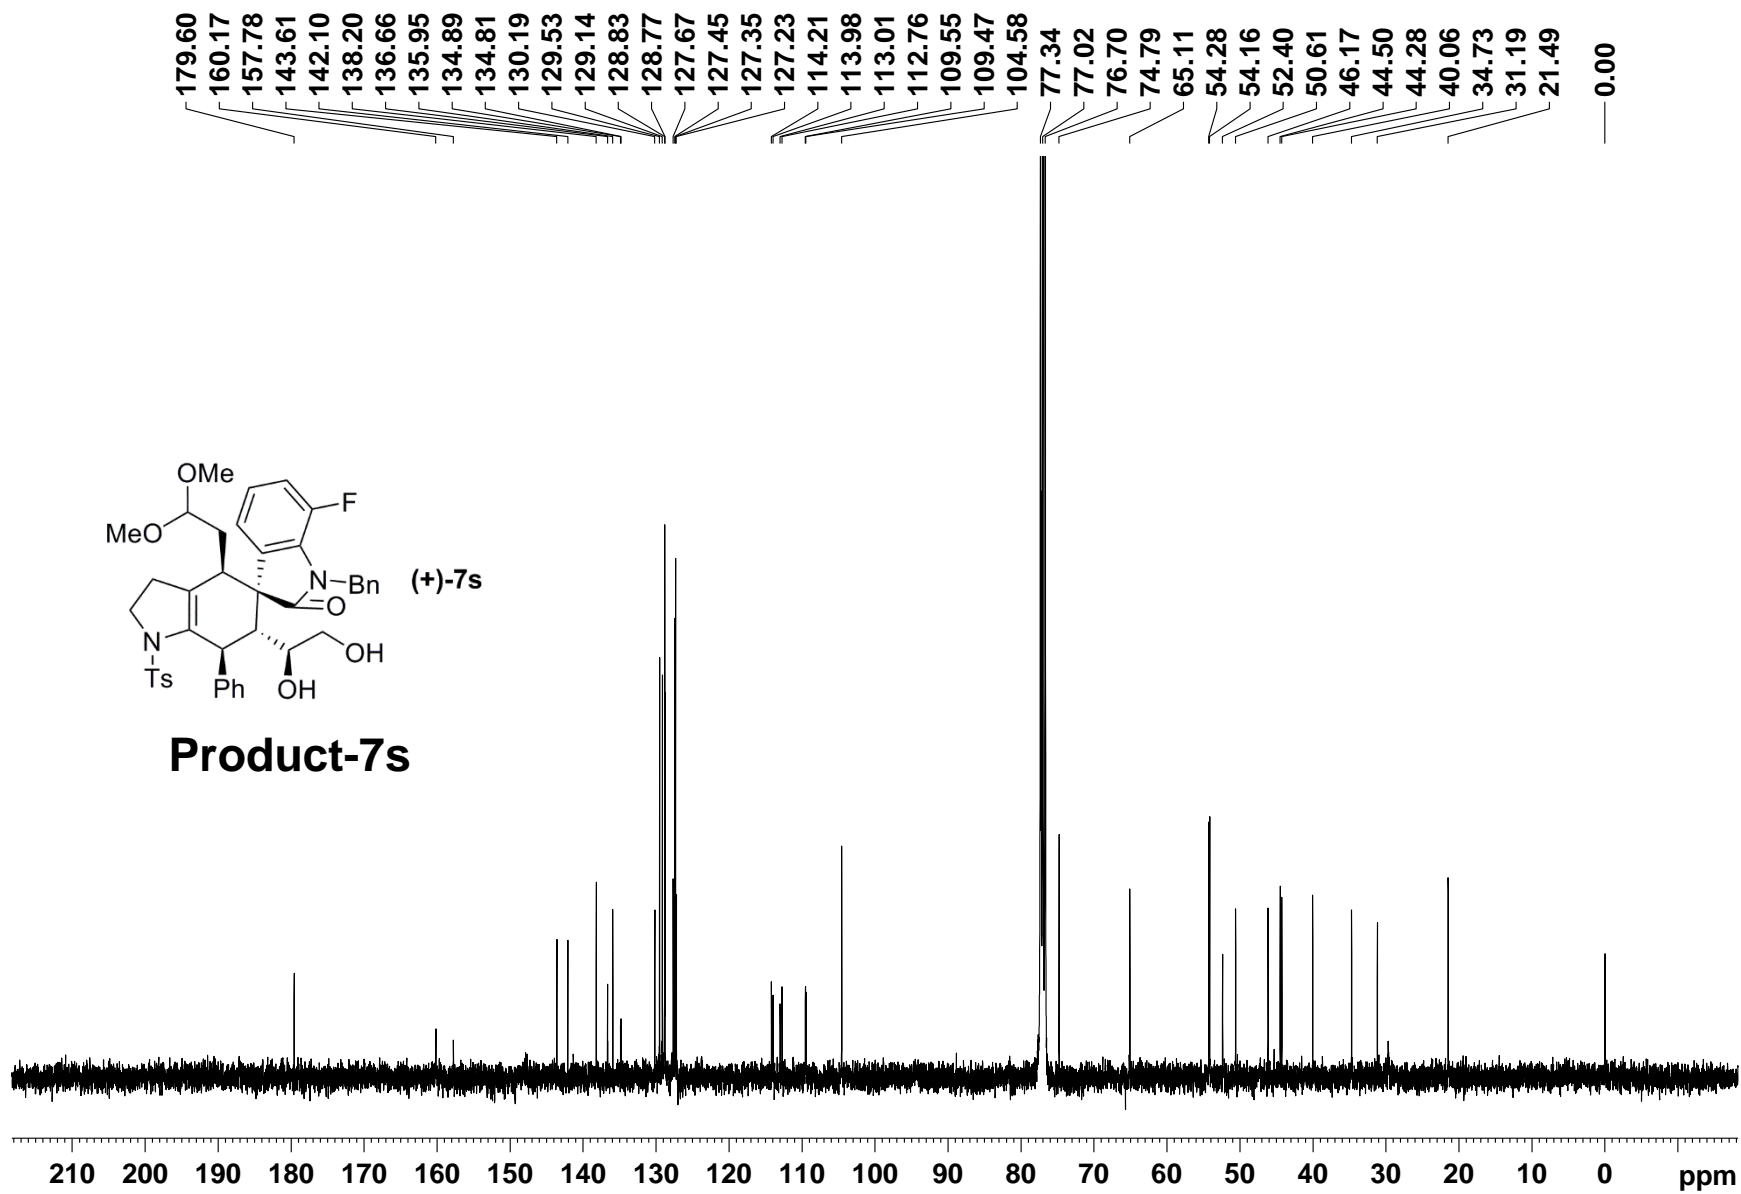



7.376  
7.369  
7.360  
7.355

4.305

3.596

3.224

2.879

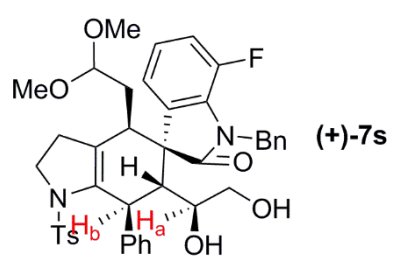

NOE of 7s

NOE of H<sub>a</sub> at 3.60 ppm

Irradiation of H<sub>b</sub> at 4.32 ppm

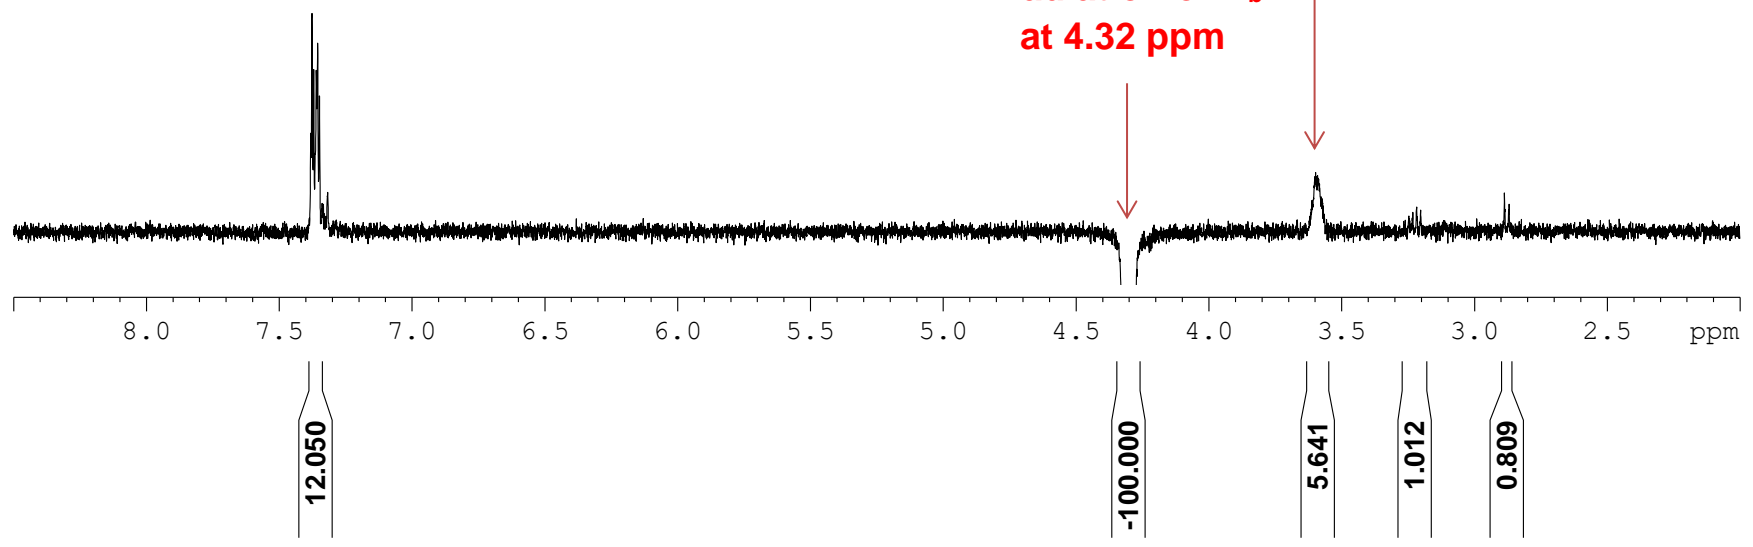

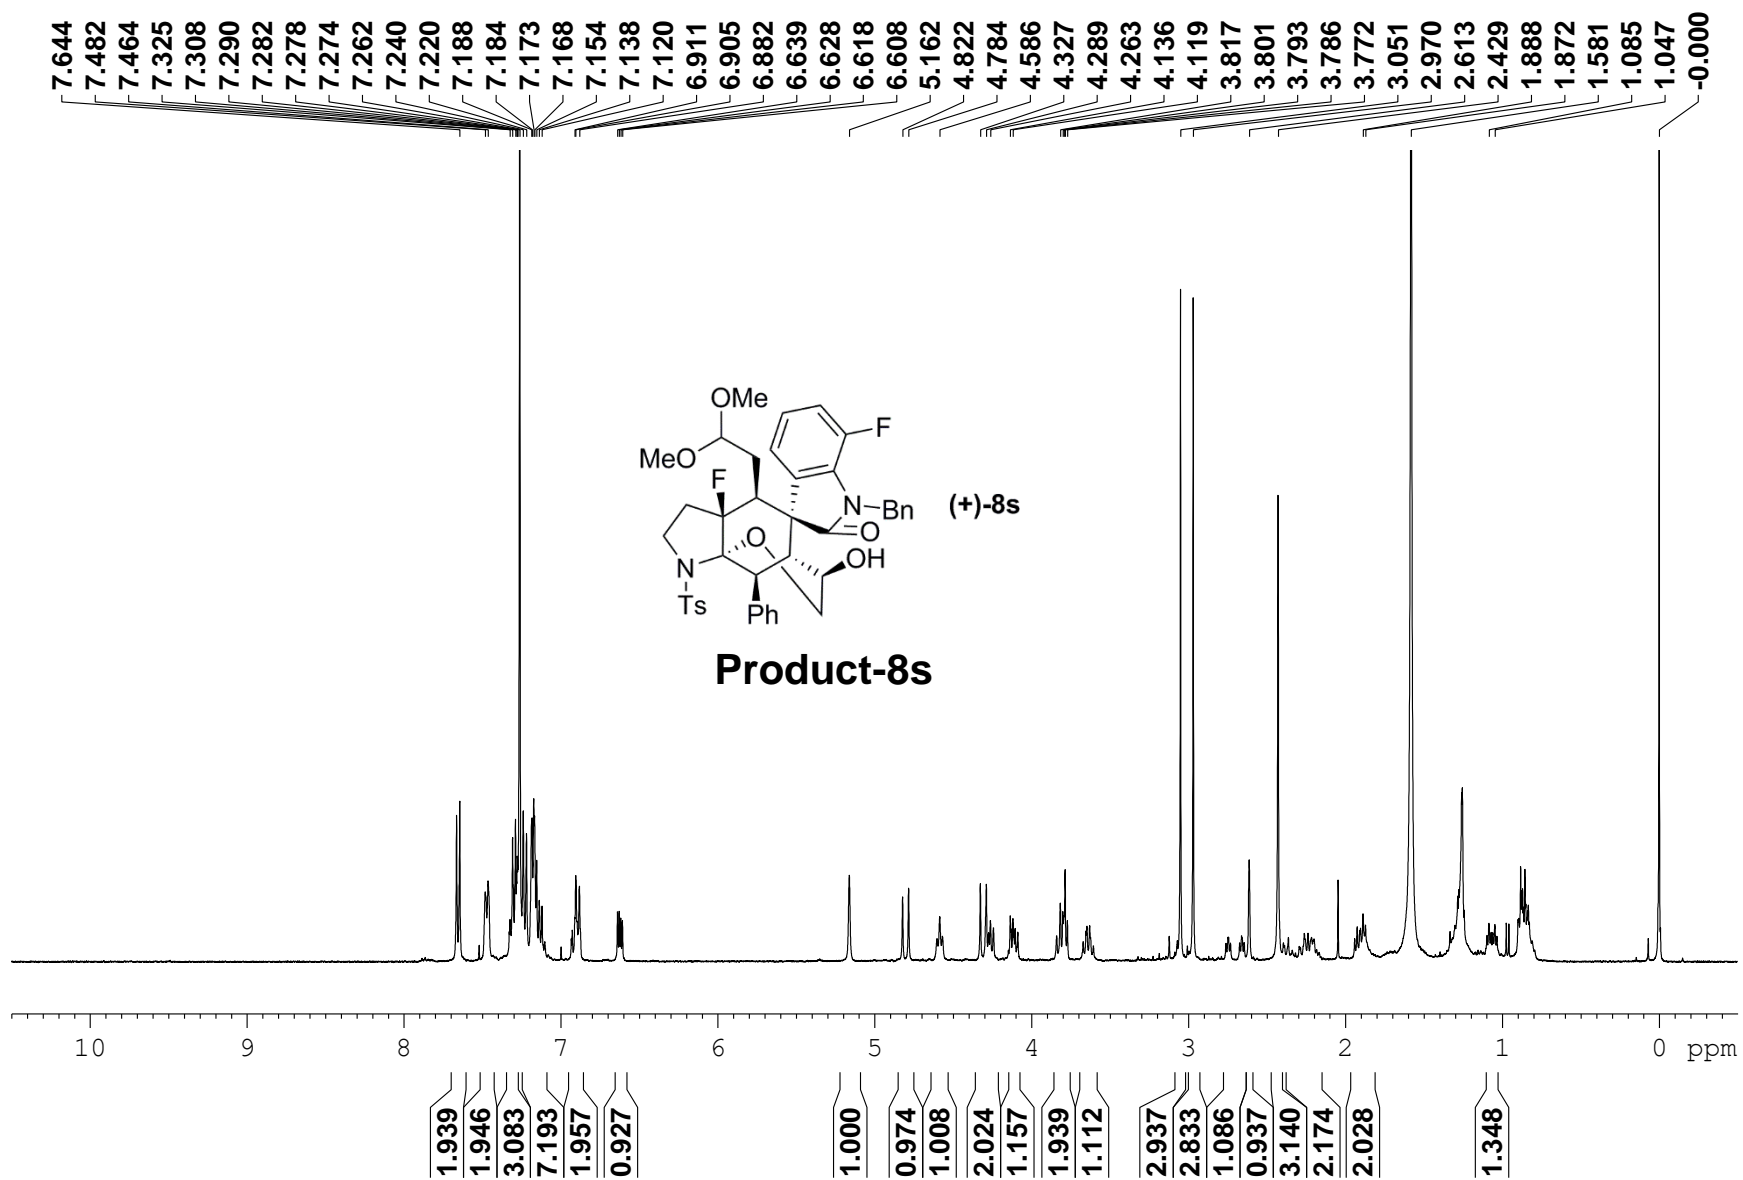

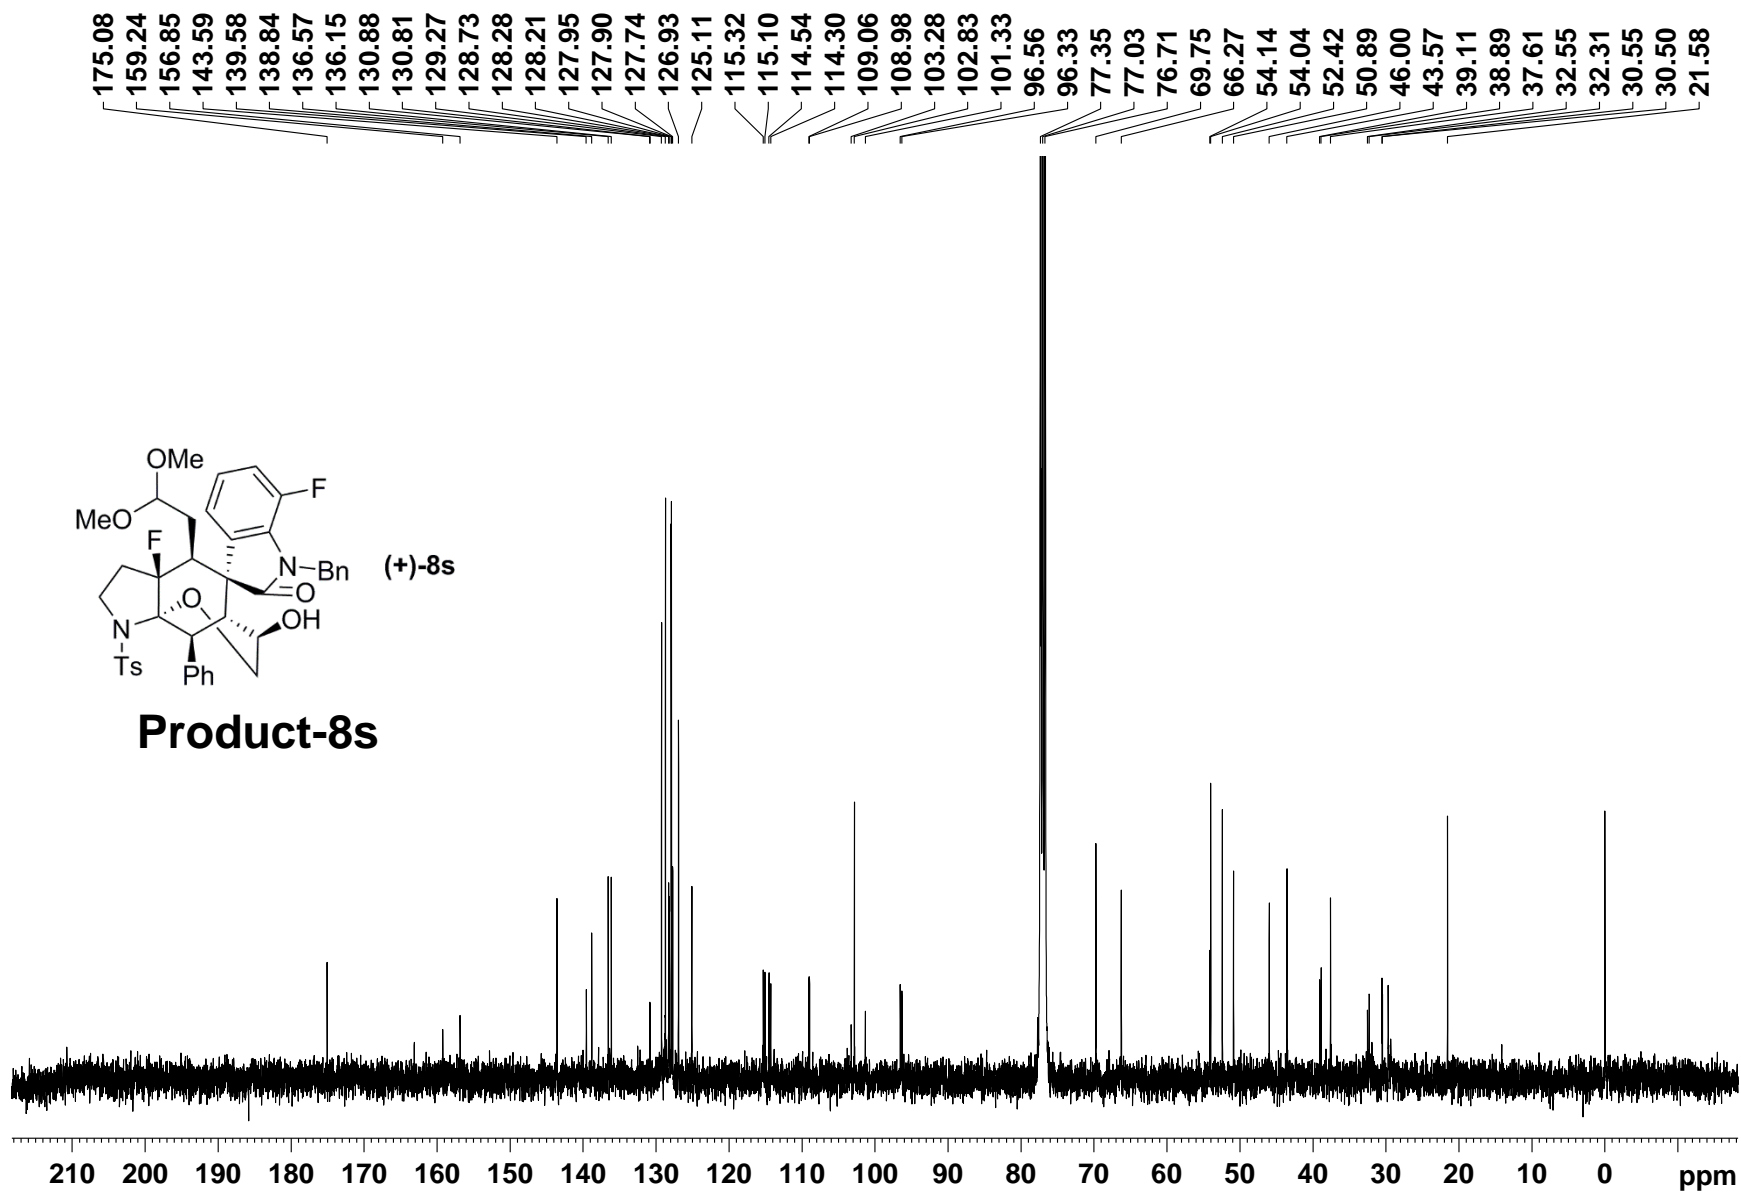

**$^{19}\text{F}$  NMR of Product -8s (376 MHz)**

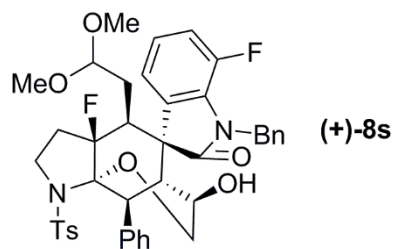

**Product-8s**

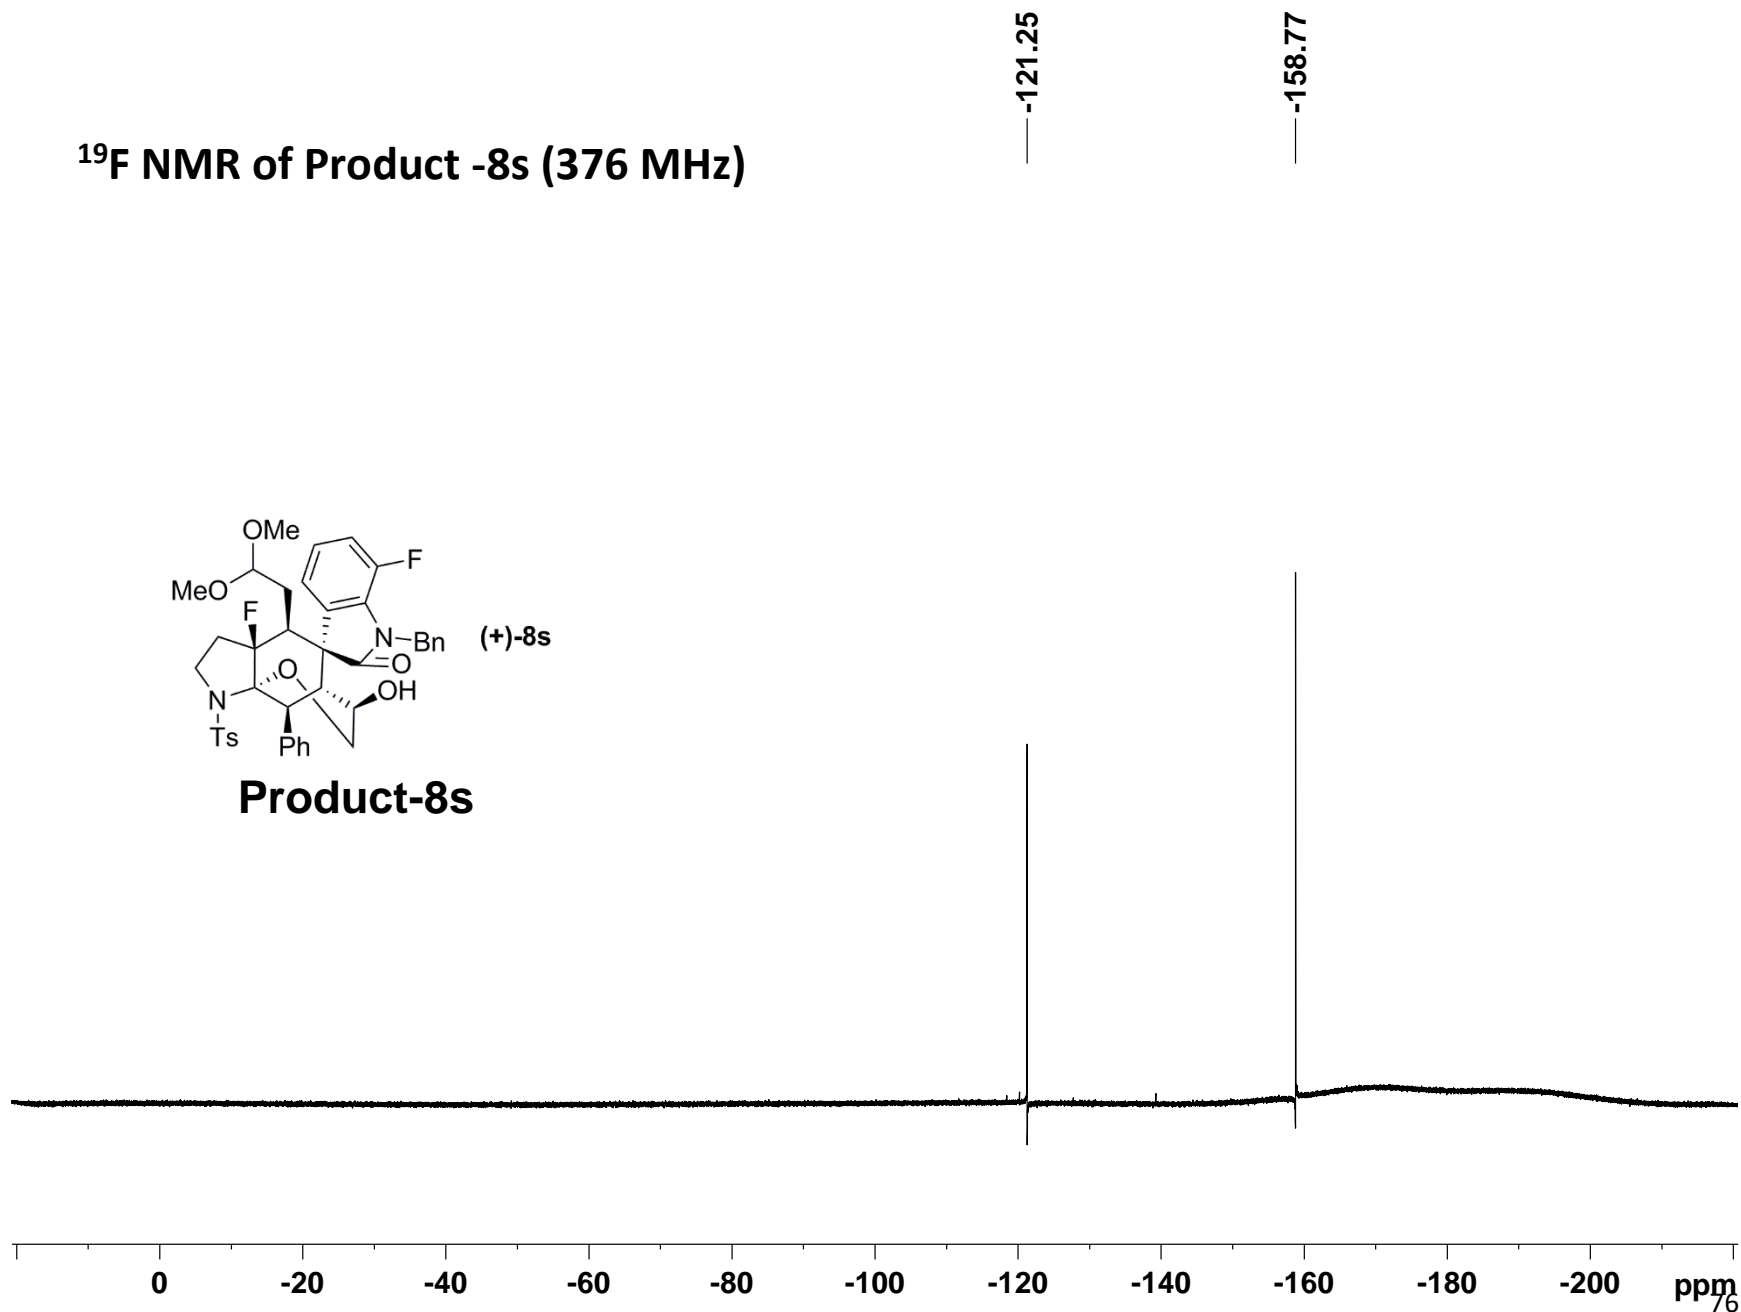

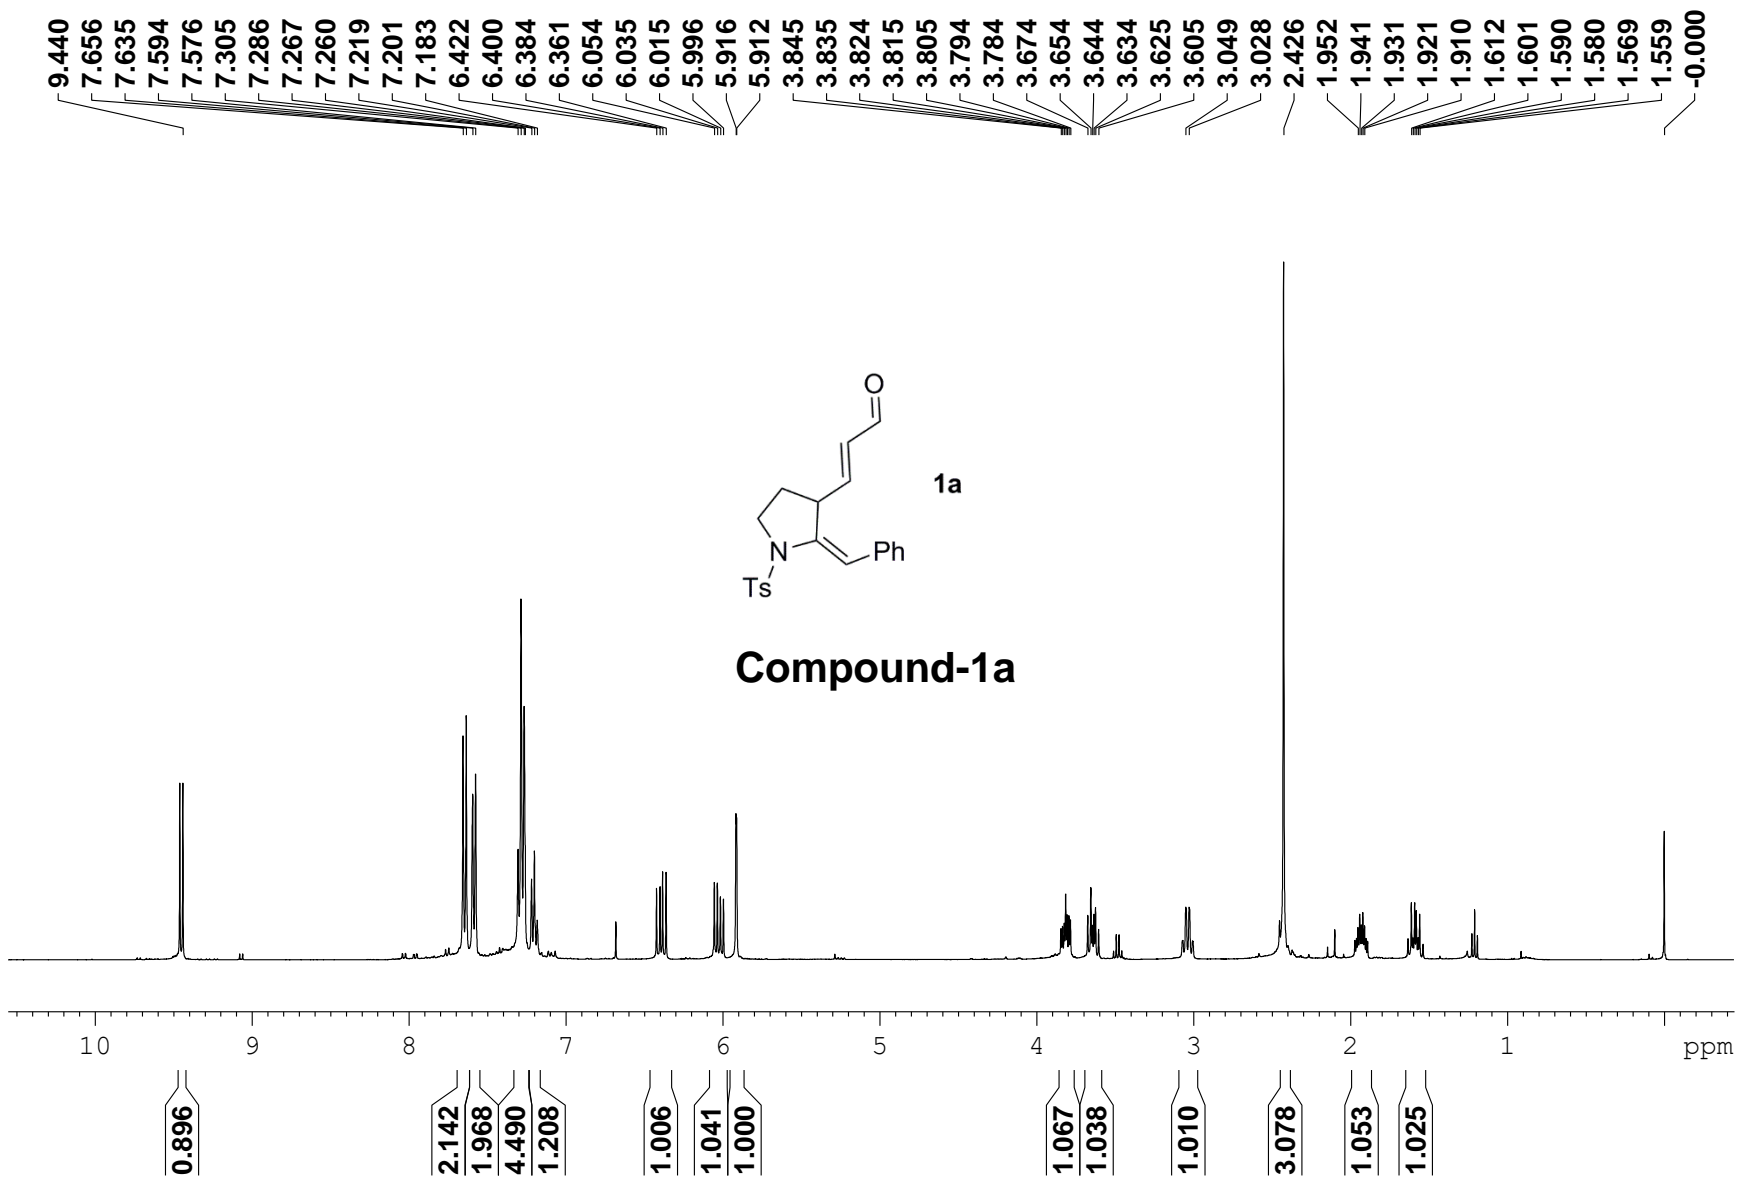

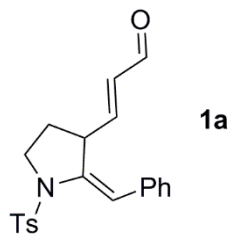

Compound-1a

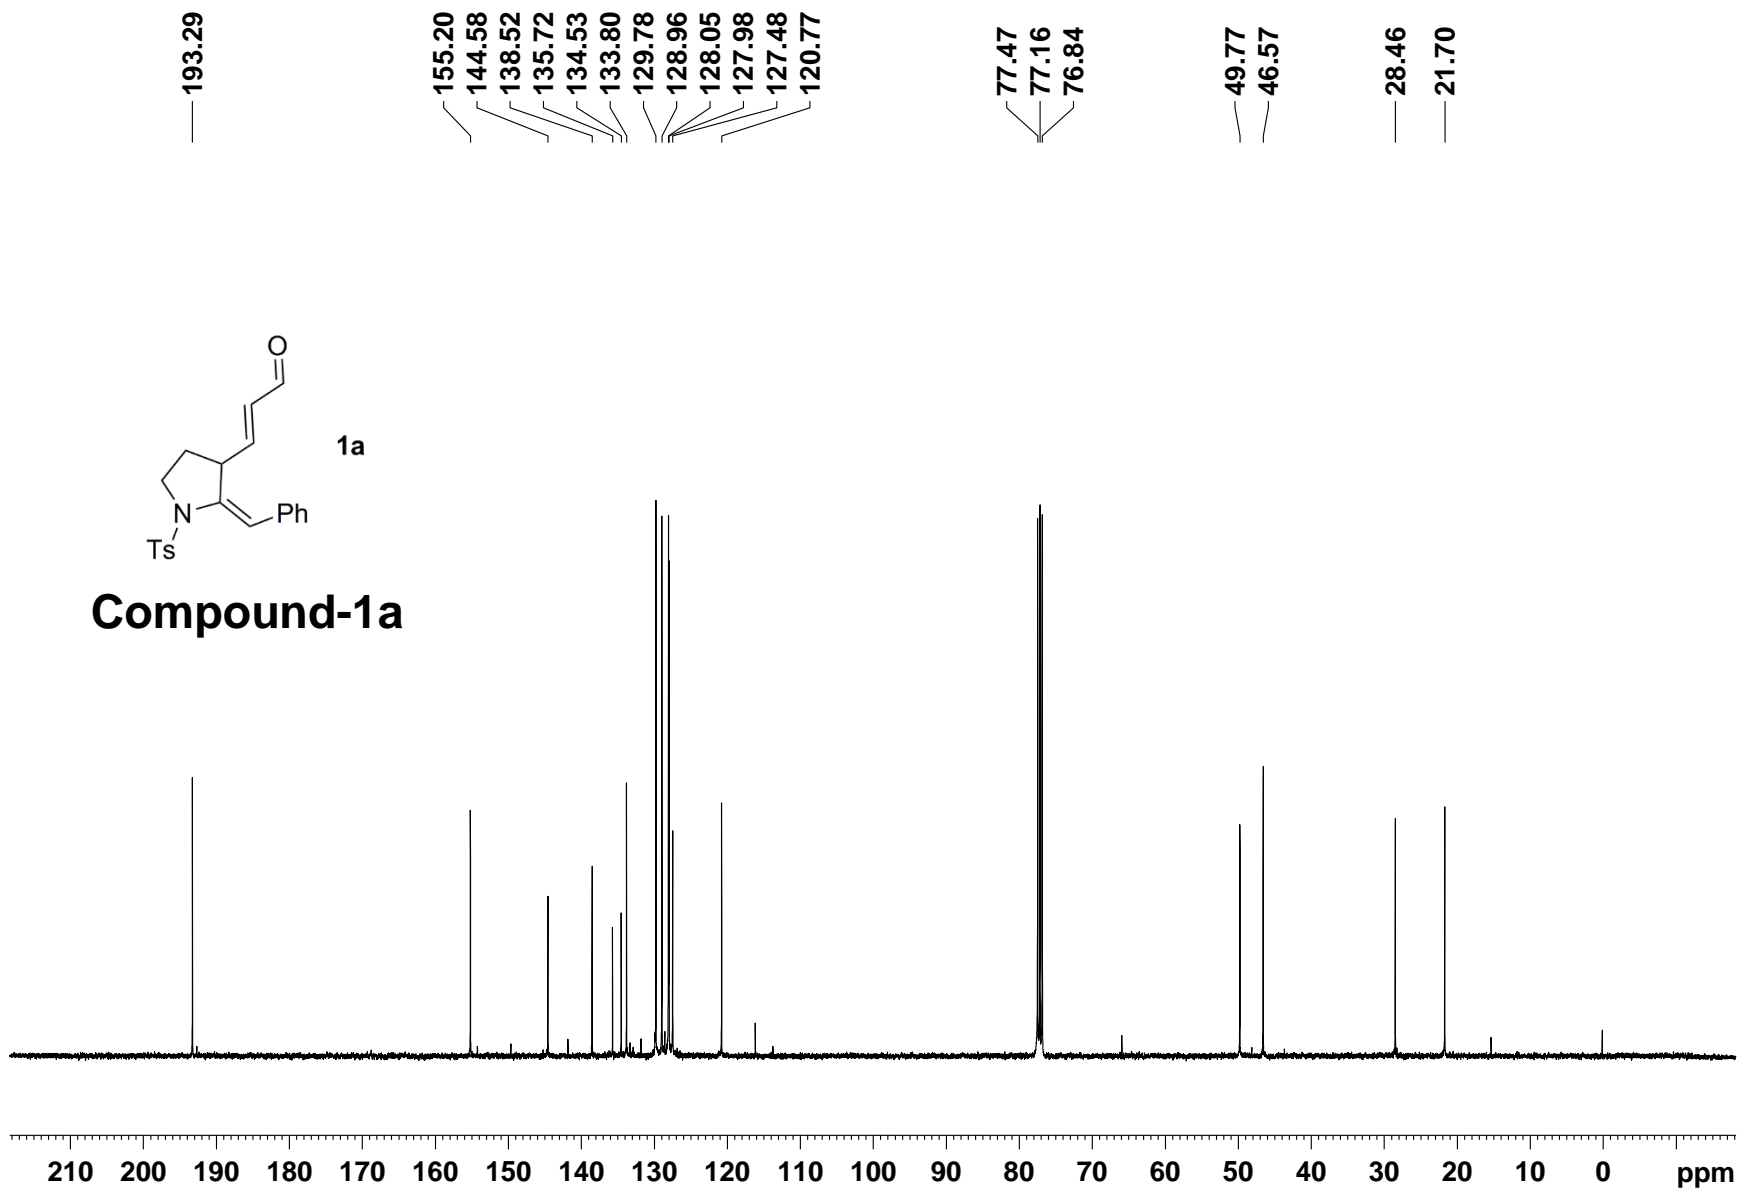

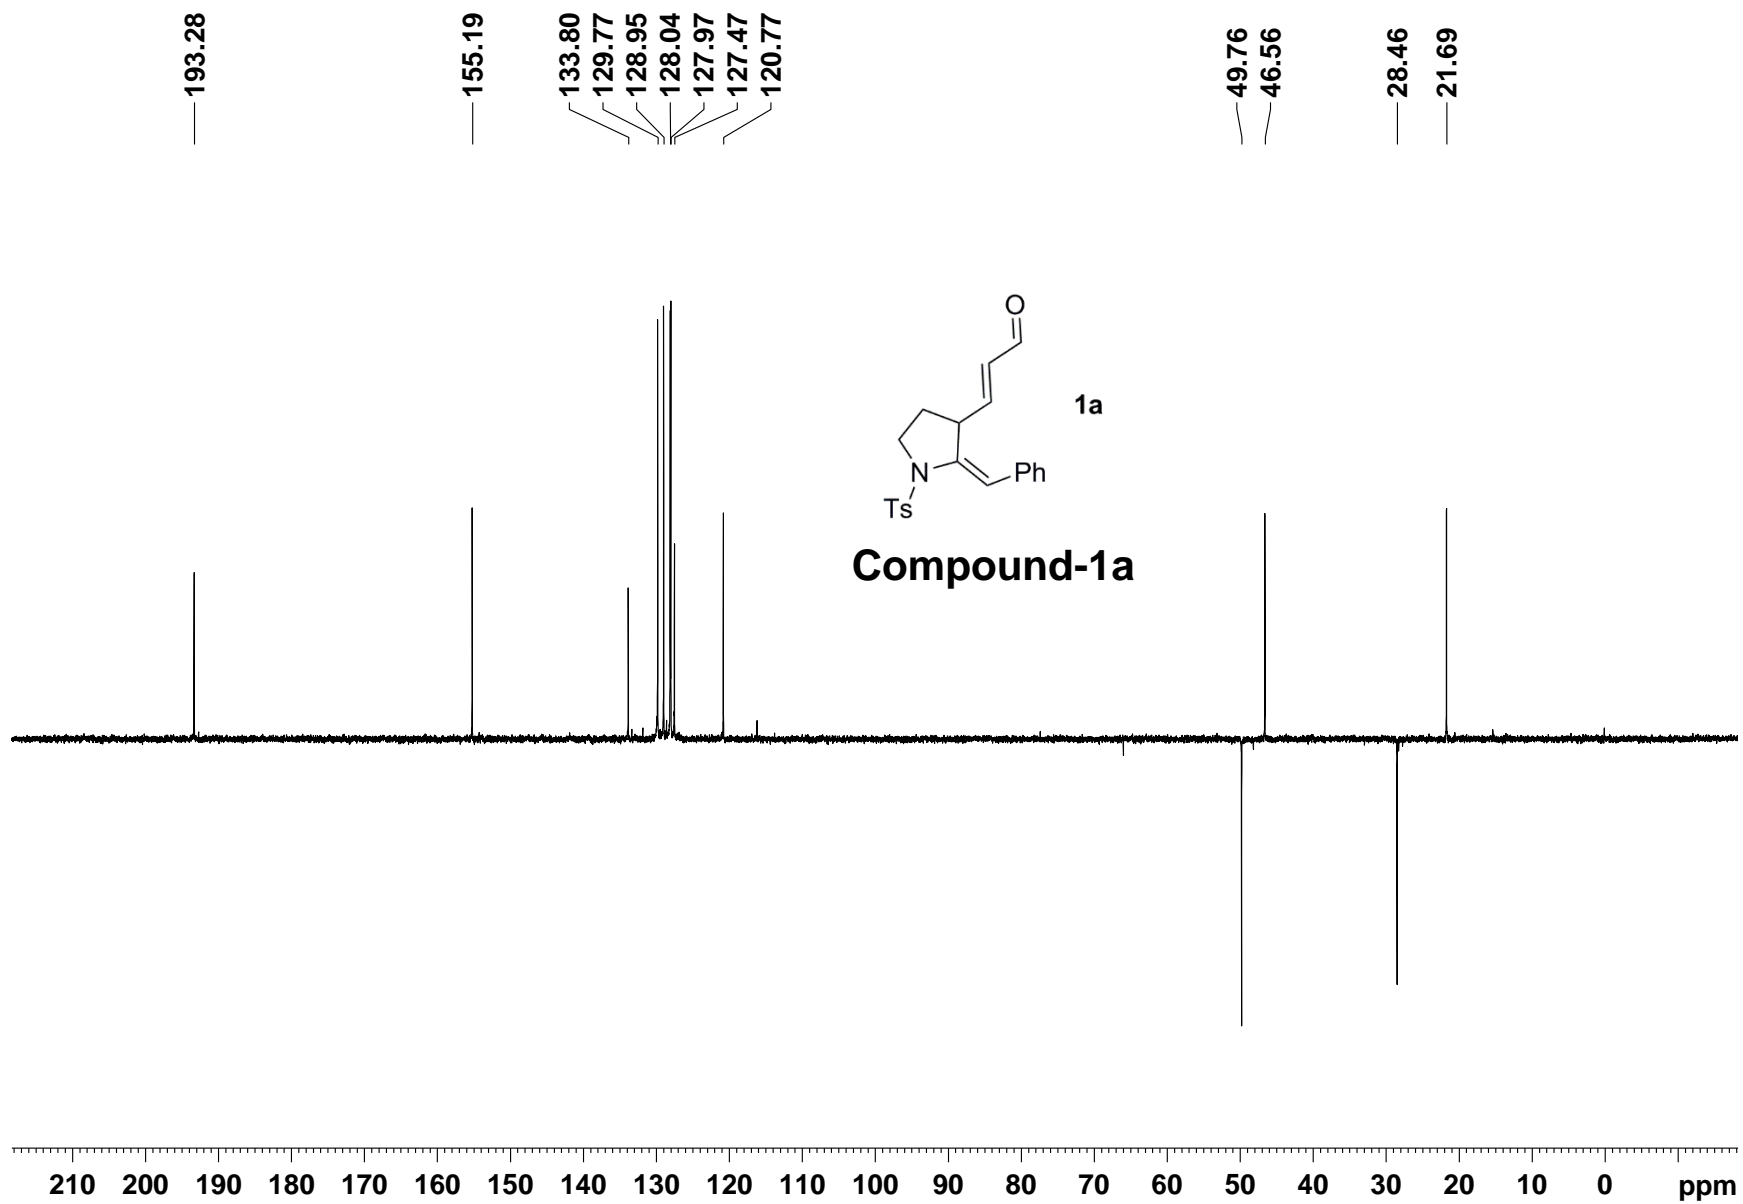

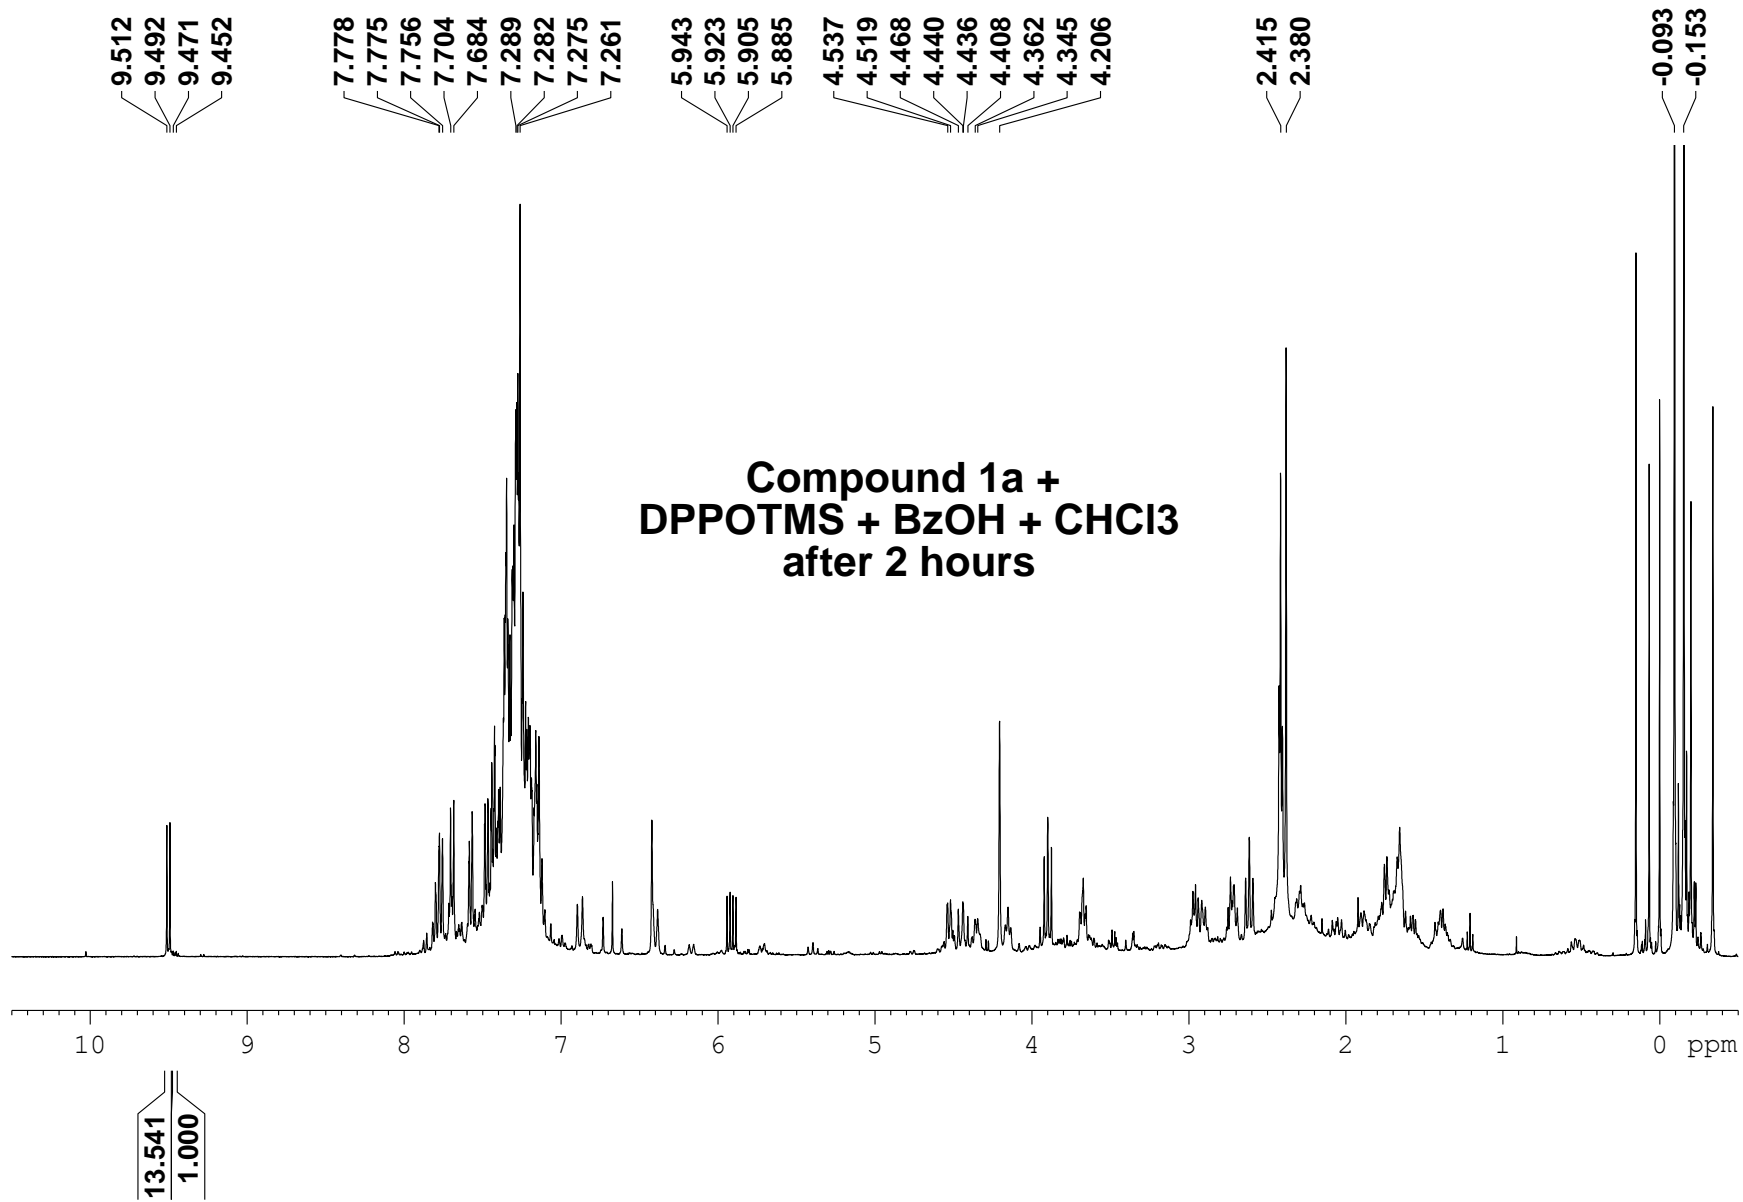



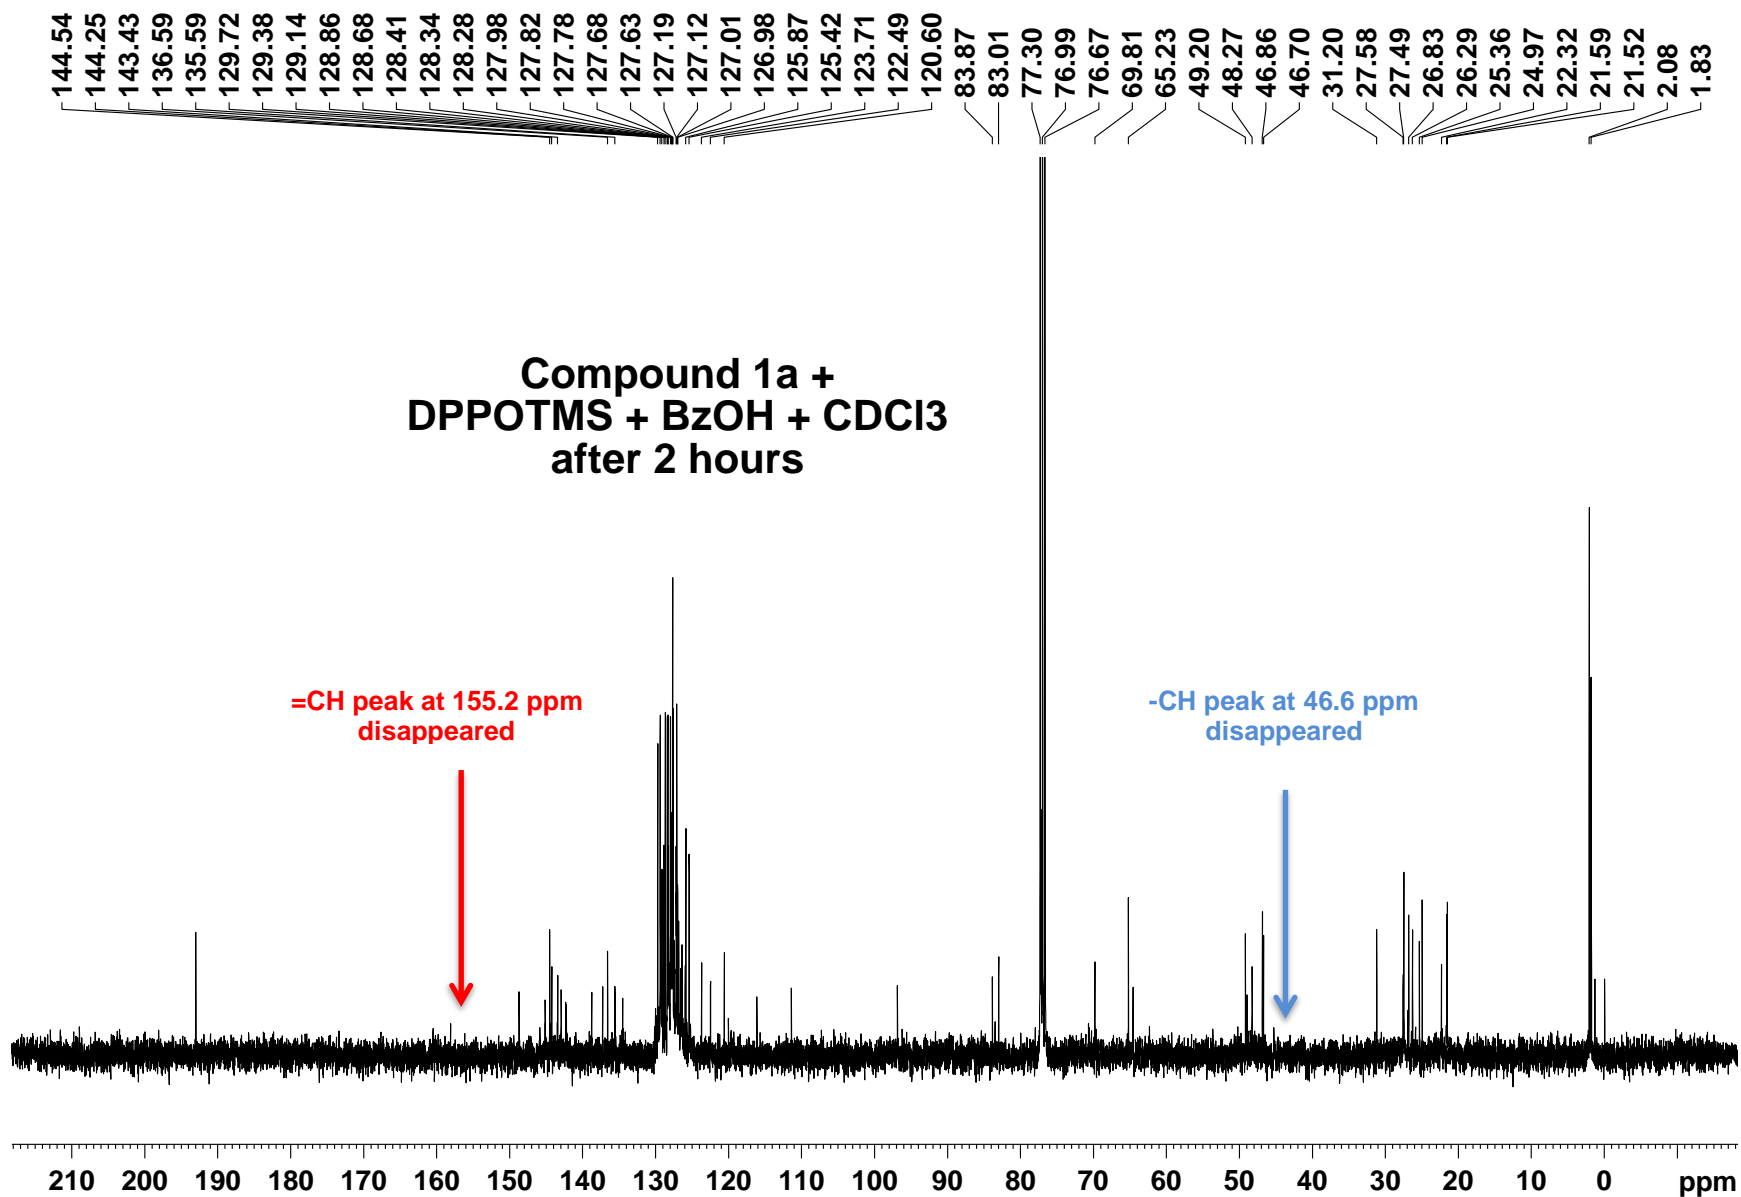

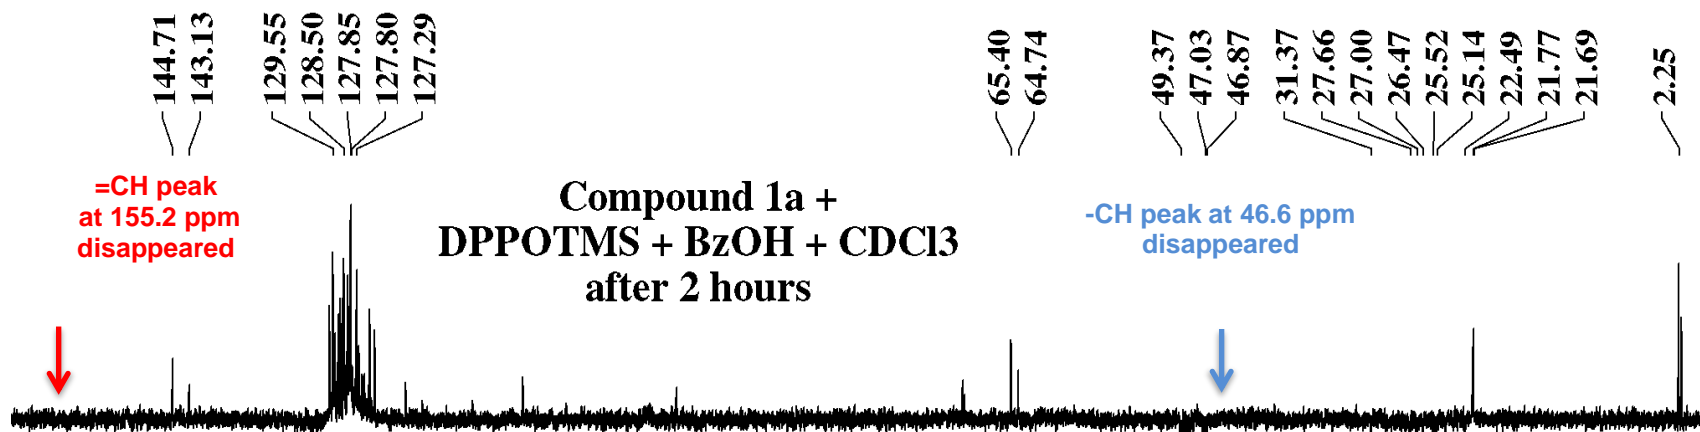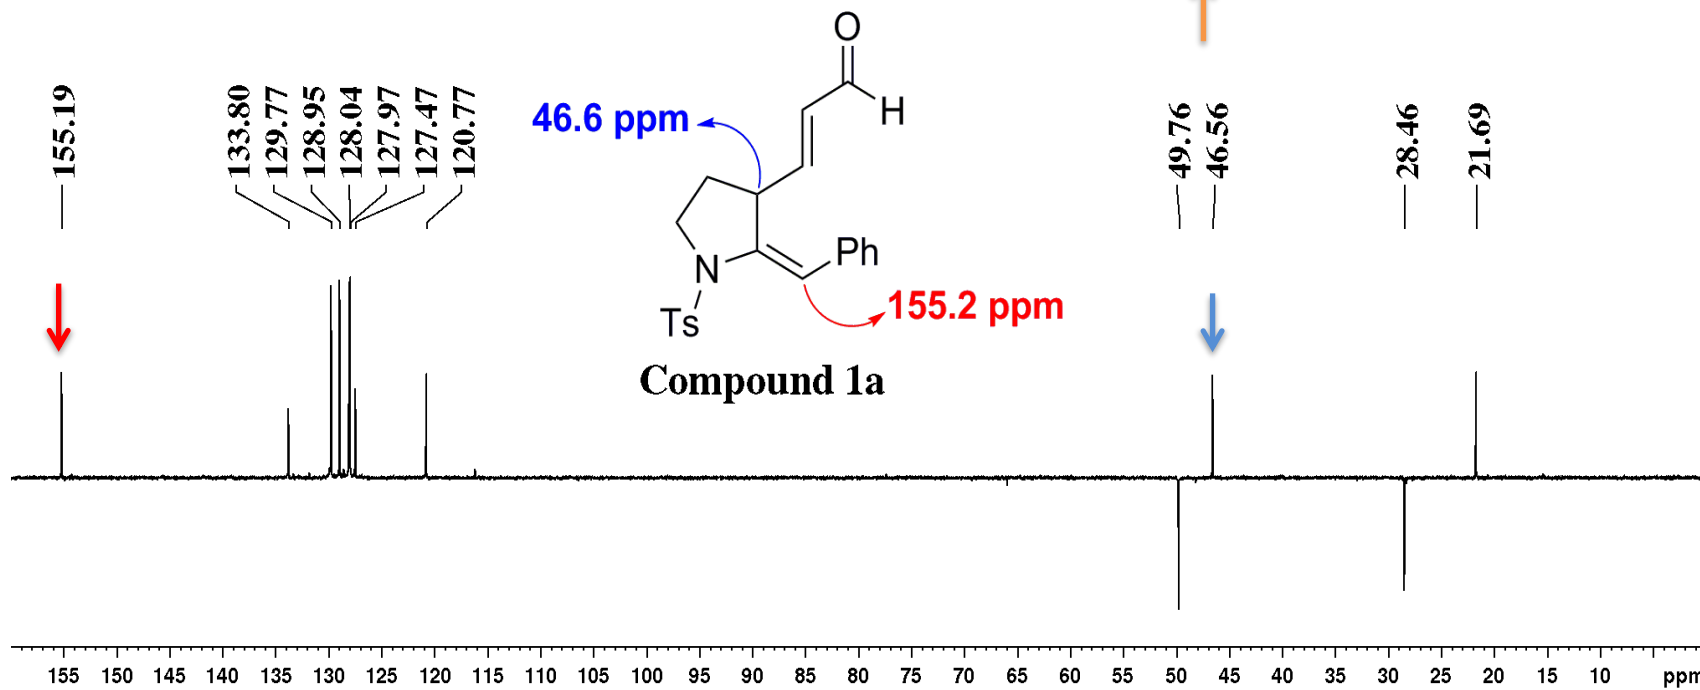

Supplement: d2ob02228a2.pdf [file d2ob02228a2.pdf]
