# Supplementary material for: Trienamine catalysed unprecedented remote olefin E/Z isomerisation/[4 + 2]-cycloaddition reaction to access spirooxindole hexahydroindoles
Source: Royal Society of Chemistry journal article supplement (doi:10.1039/d2ob02228a), 2023-01-01
Supplement: d2ob02228a3.pdf [file d2ob02228a3.pdf]

## Supporting Information-III

### HPLC Data

#### **Trienamine catalysed unprecedented remote olefin E/Z isomerisation/[4+2]-cycloaddition reaction to access spirooxindole hexahydroindoles**

**Madavi S. Prasad,<sup>\*a</sup> Murugesan Sivaprakash,<sup>a</sup> Sankar Bharani<sup>a</sup> and L. Raju Chowhan<sup>b</sup>**

*Asymmetric Synthesis and Catalysis Laboratory, Department of Chemistry, Central University of Tamil Nadu, Thiruvarur, 610 005, India*

[shivaprasad@cutn.ac.in](mailto:shivaprasad@cutn.ac.in) and [shivacutn@gmail.com](mailto:shivacutn@gmail.com)

<sup>b</sup>*School of Applied Material Sciences, Centre for Applied Chemistry, Central University of Gujarat, Sector-30, Gandhinagar-382030, Gujarat, India.*

#### **General Information:**

The enantiomeric excess (ee) of the [4+2]-annulation adducts **4** were determined by chiral stationary phase HPLC using a Daicel Chiralpak IA, Chiralpak IC, and hexane/ethyl acetate/ isopropyl alcohol as the eluent. Retention times and solvent ratios are indicated in the respective entries.

### HPLC Data of racemic **4a**

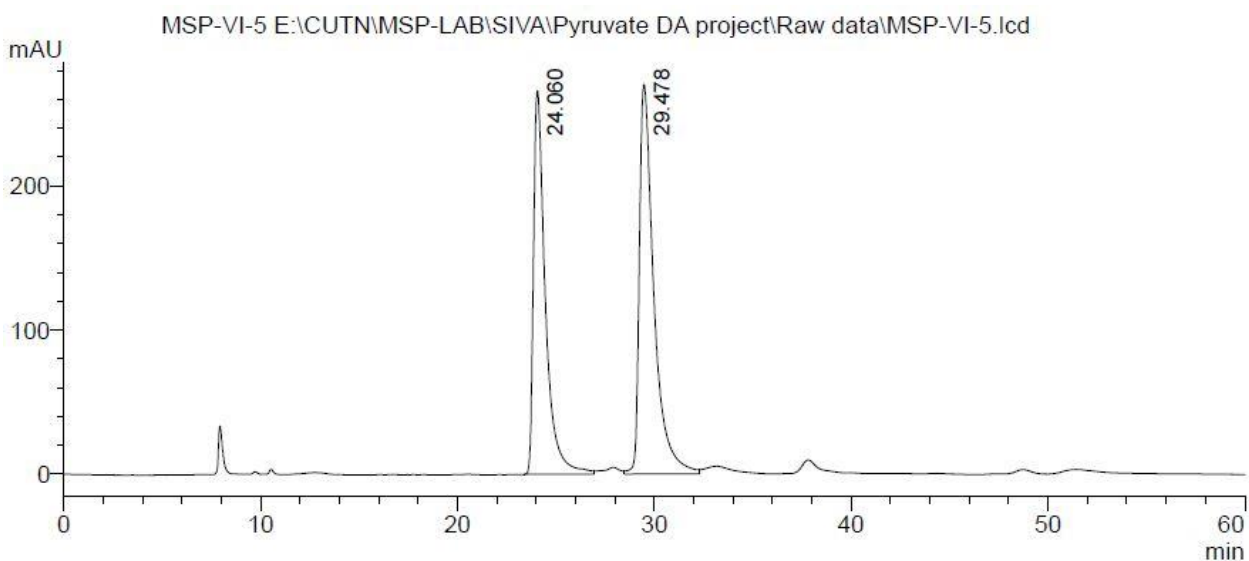

PDA Ch1 254nm

| Peak # | Ret. Time (min) | Area     | Height | Area%   |
|--------|-----------------|----------|--------|---------|
| 1      | 24.060          | 11214875 | 266278 | 44.717  |
| 2      | 29.478          | 13864575 | 270339 | 55.283  |
| Total  |                 | 25079450 | 536618 | 100.000 |

### HPLC Data of chiral **4a**: 99% *ee*

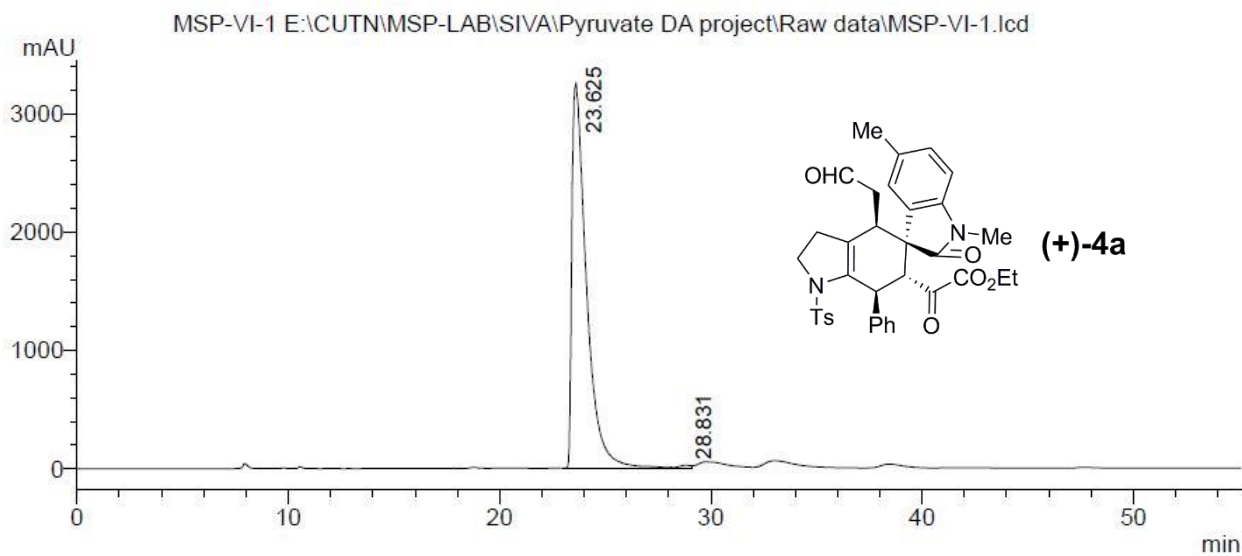

PDA Ch1 254nm

| Peak # | Ret. Time (min) | Area      | Height  | Area%   |
|--------|-----------------|-----------|---------|---------|
| 1      | 23.625          | 155520372 | 3256707 | 99.424  |
| 2      | 28.831          | 901691    | 22037   | 0.576   |
| Total  |                 | 156422063 | 3278743 | 100.000 |

### HPLC Data of racemic **4b**

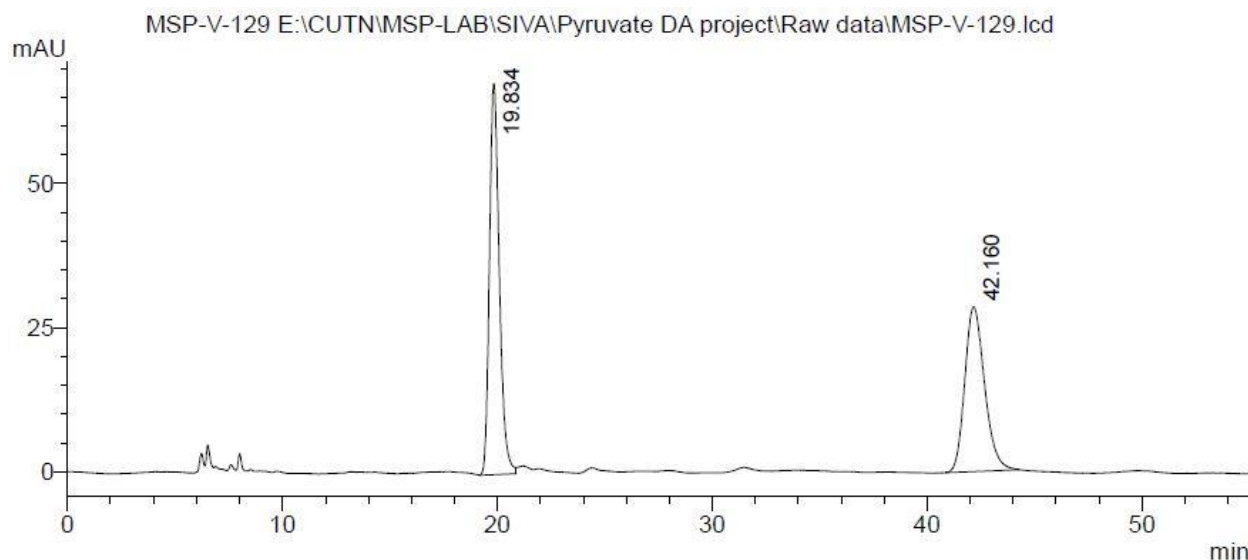

PDA Ch1 254nm

| Peak # | Ret. Time (min) | Area    | Height | Area%   |
|--------|-----------------|---------|--------|---------|
| 1      | 19.834          | 2166984 | 67818  | 54.234  |
| 2      | 42.160          | 1828668 | 28567  | 45.766  |
| Total  |                 | 3995651 | 96385  | 100.000 |

### HPLC Data of chiral **4b**: 97.6% *ee*

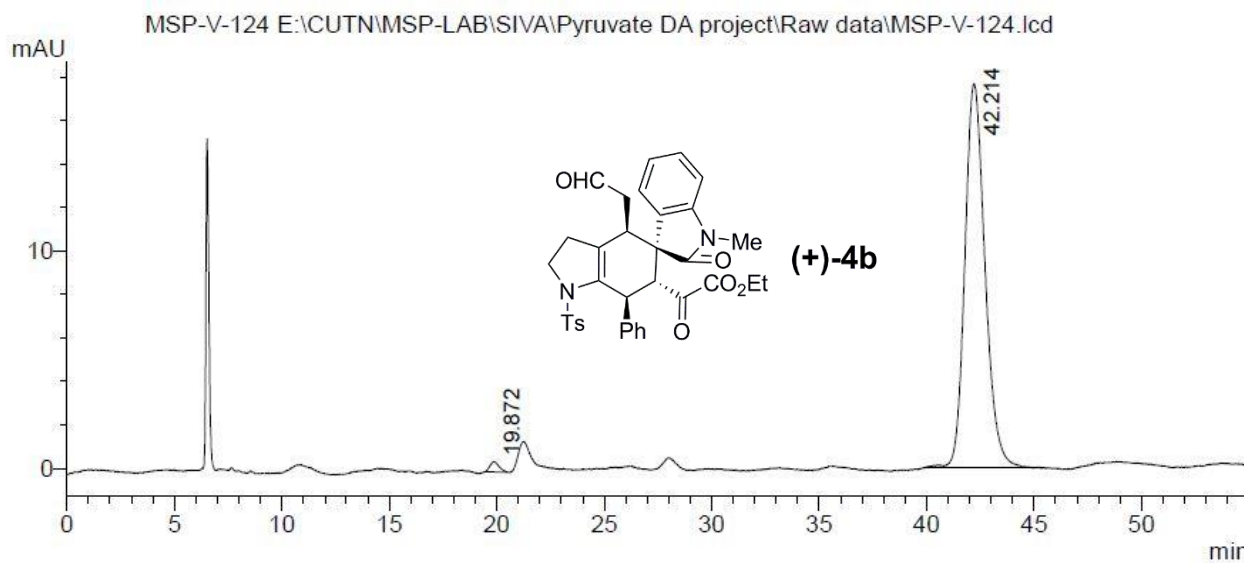

PDA Ch1 254nm

| Peak # | Ret. Time (min) | Area    | Height | Area%   |
|--------|-----------------|---------|--------|---------|
| 1      | 19.872          | 14023   | 489    | 1.199   |
| 2      | 42.214          | 1155520 | 17687  | 98.801  |
| Total  |                 | 1169543 | 18177  | 100.000 |

### HPLC Data of racemic **4c**

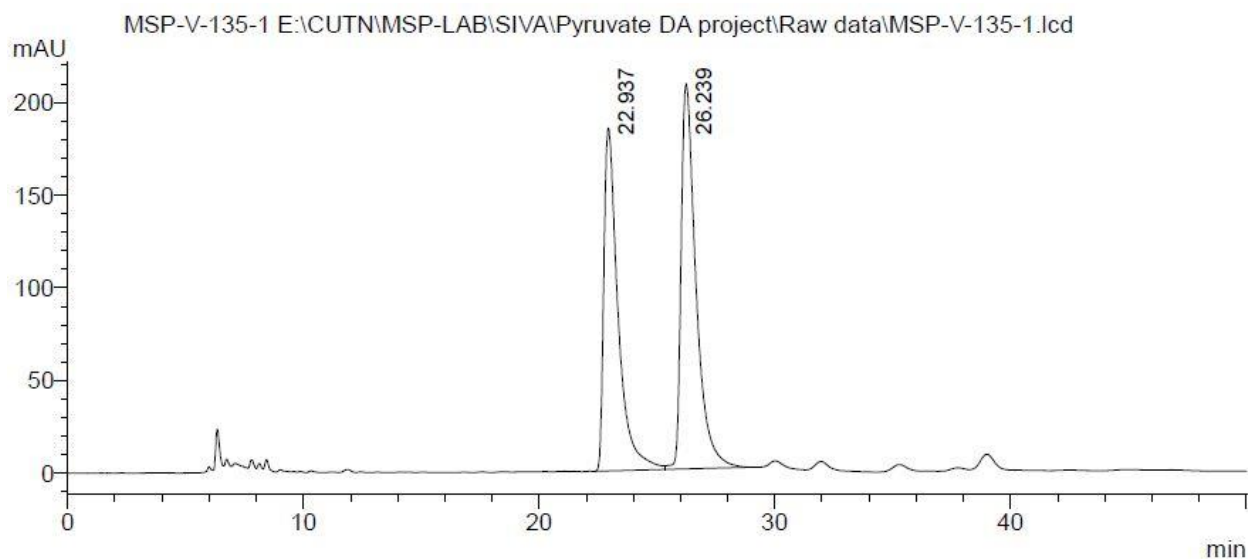

PDA Ch1 254nm

| Peak # | Ret. Time (min) | Area     | Height | Area%   |
|--------|-----------------|----------|--------|---------|
| 1      | 22.937          | 7779934  | 185065 | 46.023  |
| 2      | 26.239          | 9124596  | 207887 | 53.977  |
| Total  |                 | 16904530 | 392952 | 100.000 |

### HPLC Data of chiral **4c**: 98.6% ee

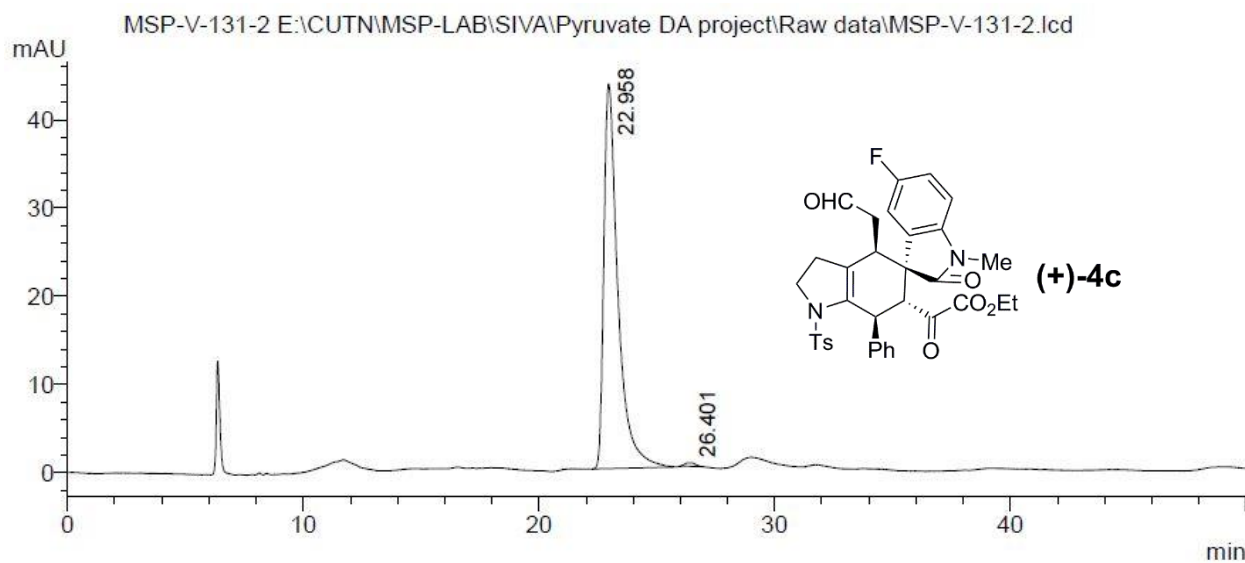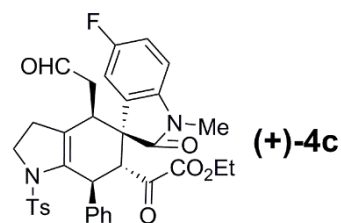

PDA Ch1 254nm

| Peak # | Ret. Time (min) | Area    | Height | Area%   |
|--------|-----------------|---------|--------|---------|
| 1      | 22.958          | 1808929 | 43584  | 99.304  |
| 2      | 26.401          | 12675   | 414    | 0.696   |
| Total  |                 | 1821604 | 43998  | 100.000 |

### HPLC Data of racemic **4d**

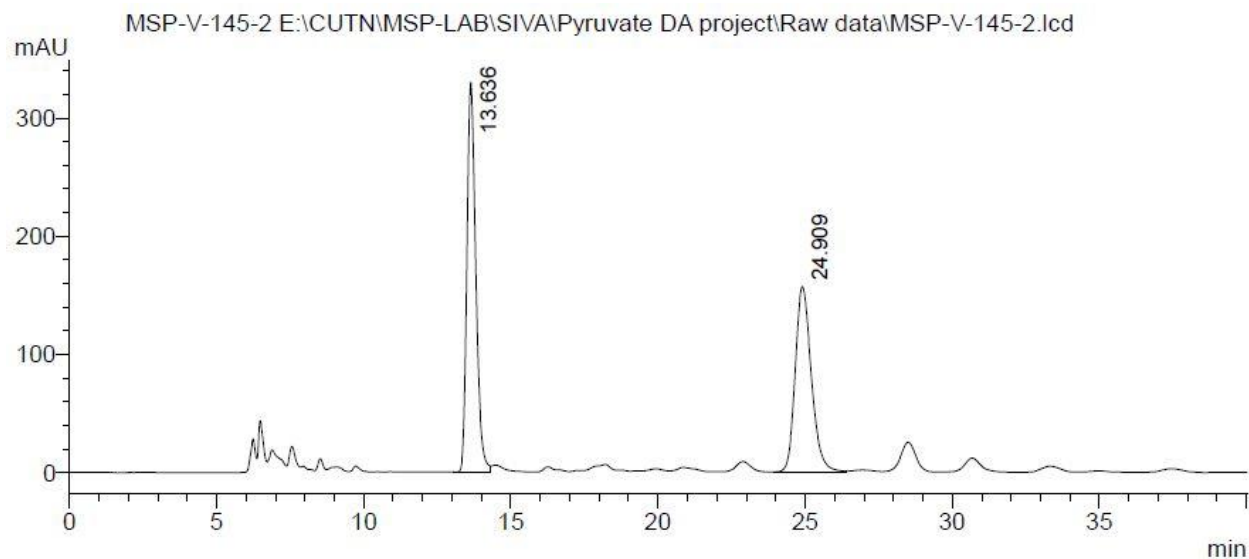

PDA Ch1 254nm

| Peak # | Ret. Time (min) | Area     | Height | Area%   |
|--------|-----------------|----------|--------|---------|
| 1      | 13.636          | 6939960  | 330133 | 53.734  |
| 2      | 24.909          | 5975369  | 156706 | 46.266  |
| Total  |                 | 12915329 | 486838 | 100.000 |

### HPLC Data of chiral **4d**: 98% *ee*

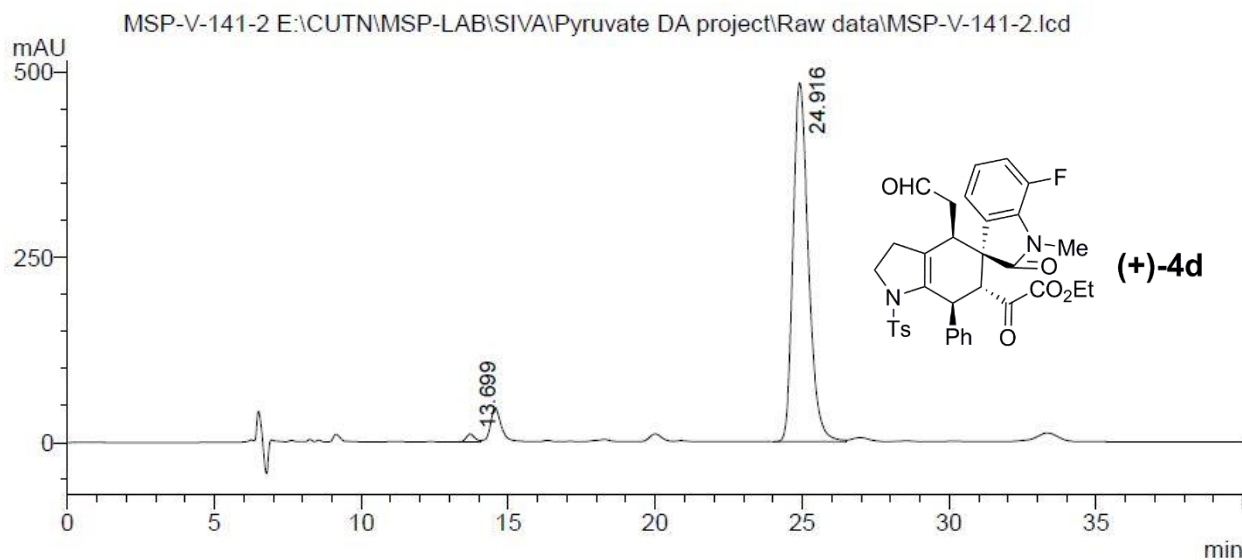

PDA Ch1 254nm

| Peak # | Ret. Time (min) | Area     | Height | Area%   |
|--------|-----------------|----------|--------|---------|
| 1      | 13.699          | 216507   | 10627  | 1.217   |
| 2      | 24.916          | 17568054 | 484123 | 98.783  |
| Total  |                 | 17784562 | 494750 | 100.000 |

### HPLC Data of racemic **4e**

MSP-V-136 E:\CUTN\MSP-LAB\SIVA\Pyruvate DA project\Raw data\MSP-V-136.lcd

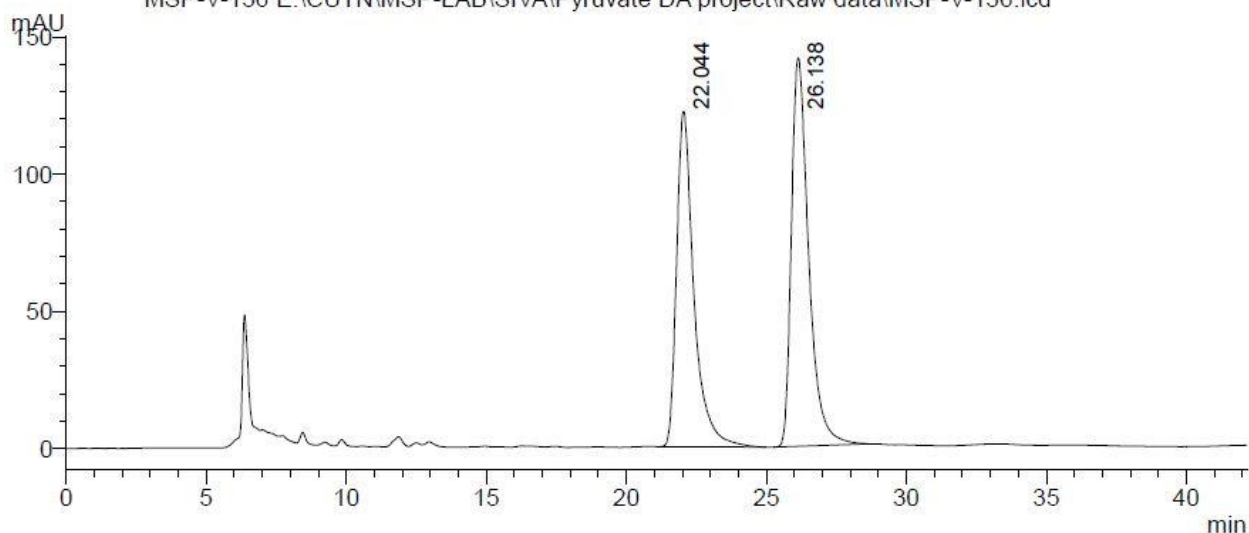

PDA Ch1 254nm

| Peak # | Ret. Time (min) | Area     | Height | Area%   |
|--------|-----------------|----------|--------|---------|
| 1      | 22.044          | 5255620  | 122195 | 46.442  |
| 2      | 26.138          | 6060822  | 141491 | 53.558  |
| Total  |                 | 11316442 | 263686 | 100.000 |

### HPLC Data of chiral **4e**: 99% *ee*

MSP-V-132 E:\CUTN\MSP-LAB\SIVA\Pyruvate DA project\Raw data\MSP-V-132.lcd

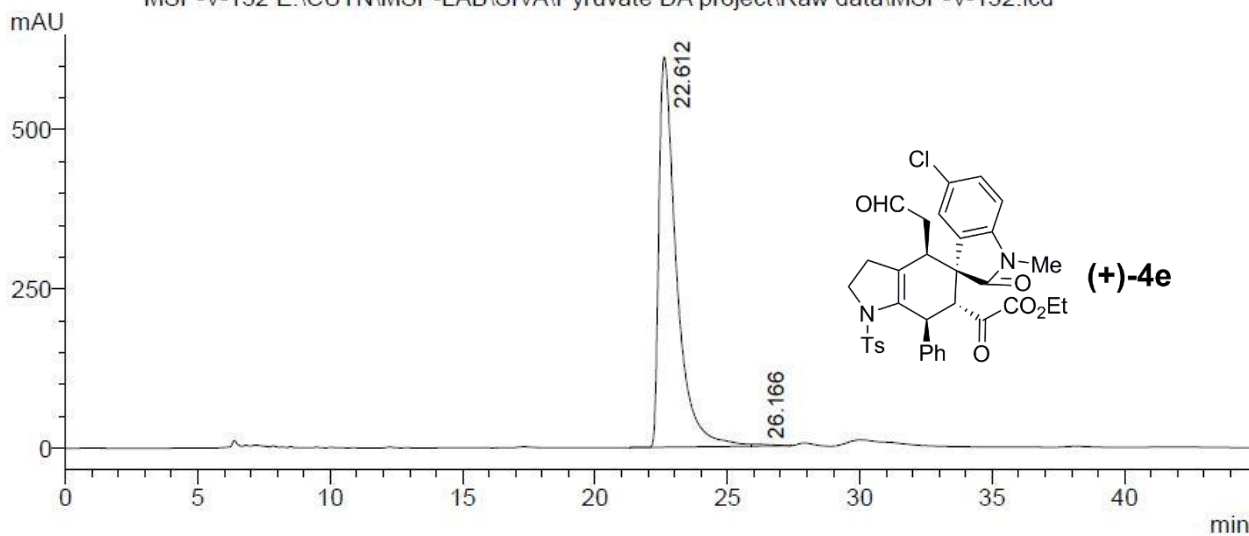

PDA Ch1 254nm

| Peak # | Ret. Time (min) | Area     | Height | Area%   |
|--------|-----------------|----------|--------|---------|
| 1      | 22.612          | 28179350 | 611871 | 99.517  |
| 2      | 26.166          | 136899   | 2728   | 0.483   |
| Total  |                 | 28316249 | 614599 | 100.000 |

### HPLC Data of racemic **4f**

MSP-V-146-1 E:\CUTN\MSP-LAB\SIVA\Pyruvate DA project\Raw data\MSP-V-146-1.lcd

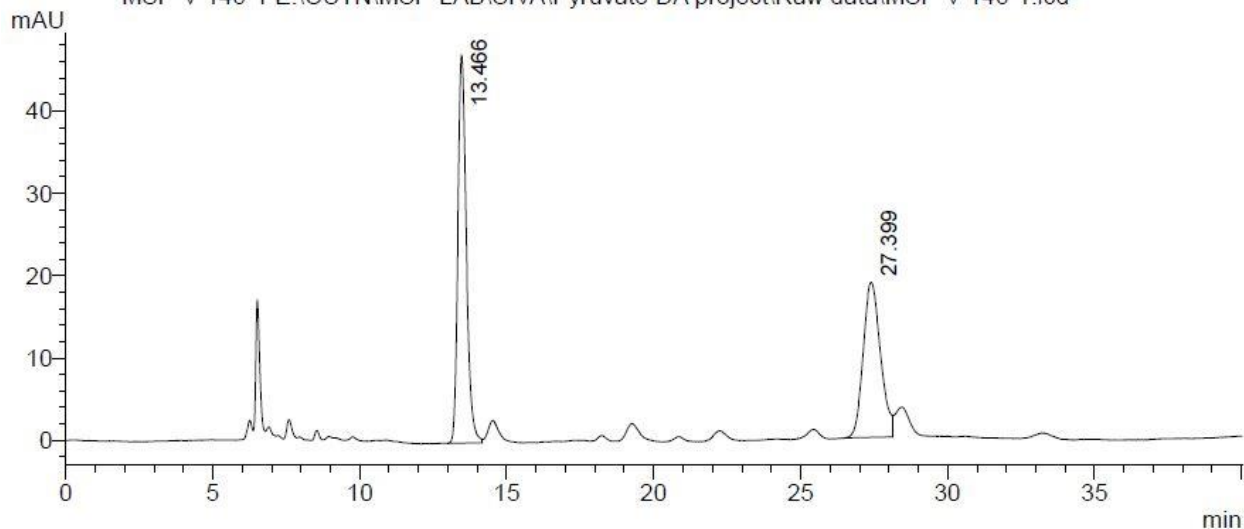

PDA Ch1 254nm

| Peak # | Ret. Time (min) | Area    | Height | Area%   |
|--------|-----------------|---------|--------|---------|
| 1      | 13.466          | 937480  | 47131  | 54.898  |
| 2      | 27.399          | 770194  | 18851  | 45.102  |
| Total  |                 | 1707674 | 65982  | 100.000 |

### HPLC Data of chiral **4f**: 98% *ee*

MSP-V-142-2 E:\CUTN\MSP-LAB\SIVA\Pyruvate DA project\Raw data\MSP-V-142-2.lcd

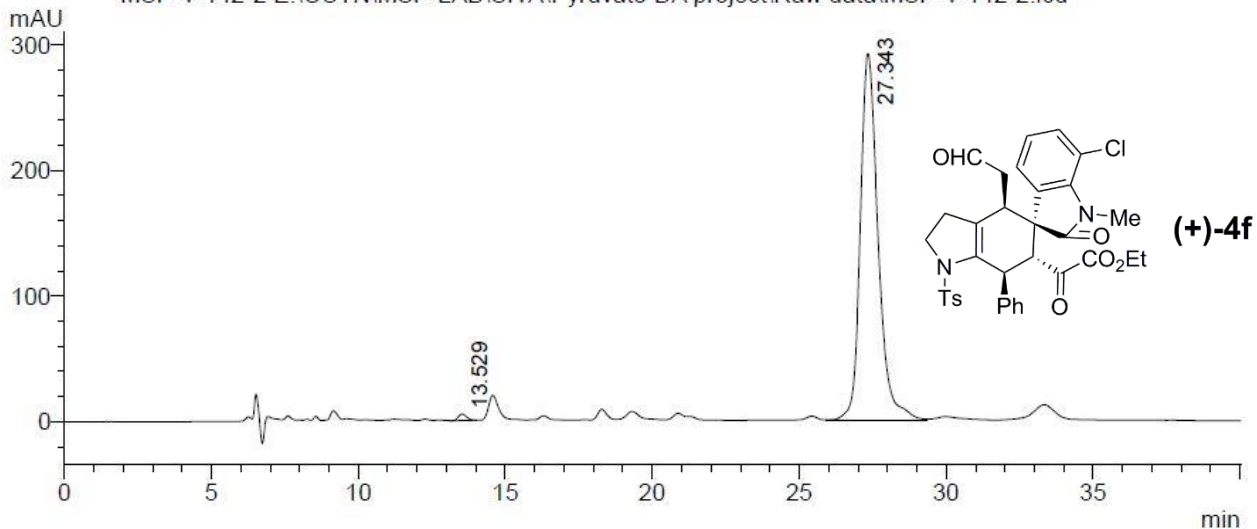

PDA Ch1 254nm

| Peak # | Ret. Time (min) | Area     | Height | Area%   |
|--------|-----------------|----------|--------|---------|
| 1      | 13.529          | 96790    | 5046   | 0.781   |
| 2      | 27.343          | 12291756 | 291664 | 99.219  |
| Total  |                 | 12388546 | 296710 | 100.000 |

### HPLC Data of racemic **4g**

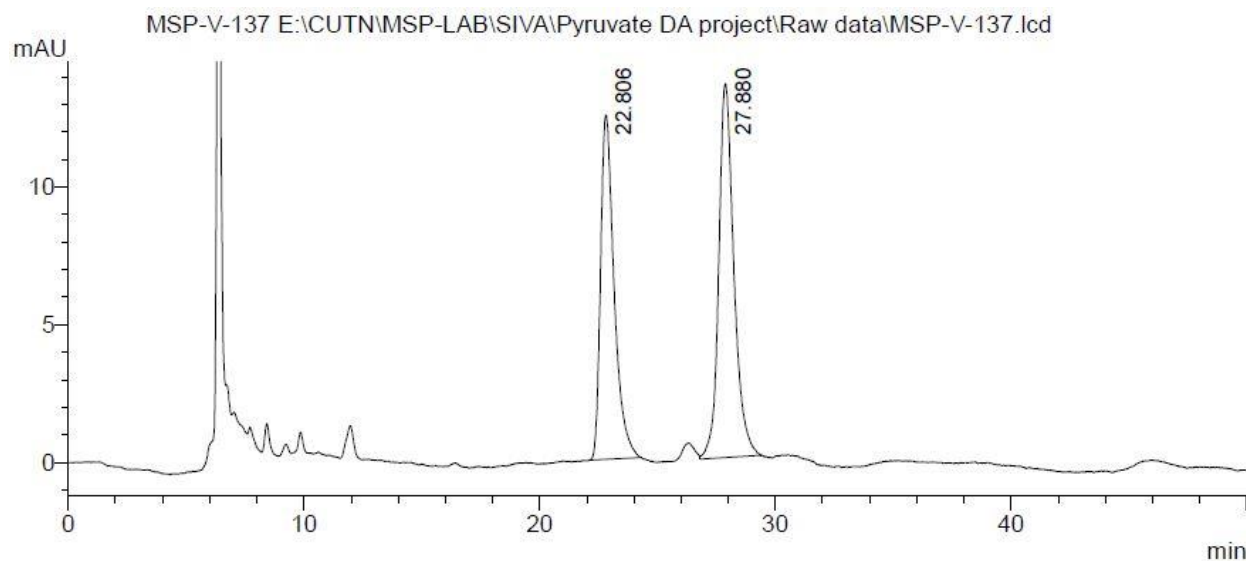

PDA Ch1 254nm

| Peak # | Ret. Time (min) | Area    | Height | Area%   |
|--------|-----------------|---------|--------|---------|
| 1      | 22.806          | 498969  | 12493  | 45.172  |
| 2      | 27.880          | 605635  | 13566  | 54.828  |
| Total  |                 | 1104603 | 26060  | 100.000 |

### HPLC Data of chiral **4g**: 98.6% ee

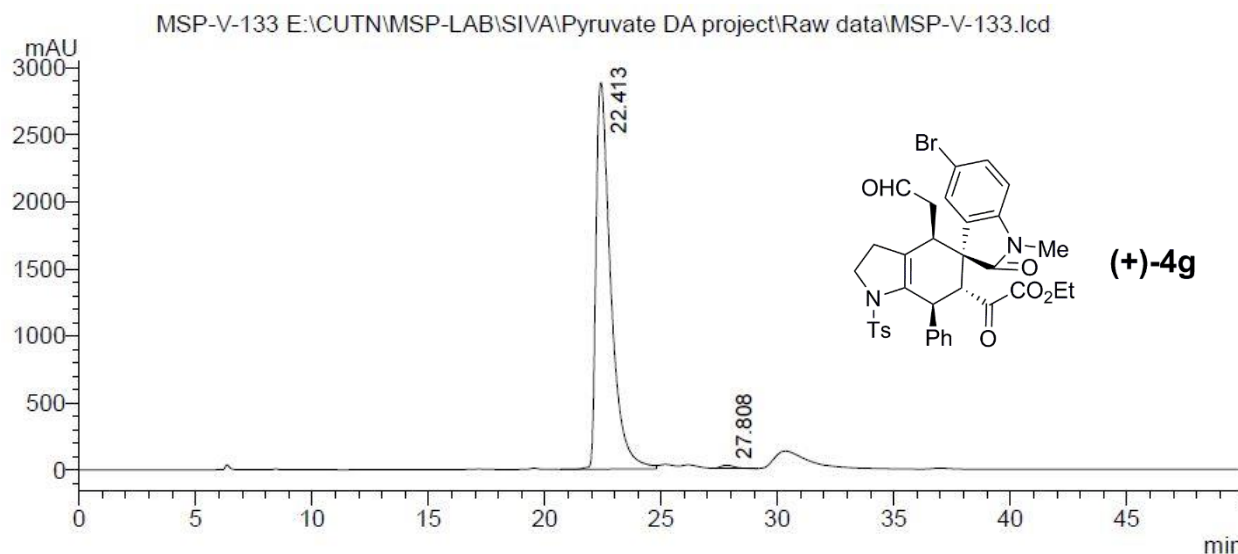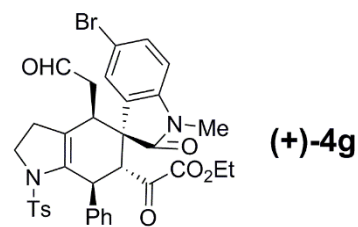

PDA Ch1 254nm

| Peak # | Ret. Time (min) | Area      | Height  | Area%   |
|--------|-----------------|-----------|---------|---------|
| 1      | 22.413          | 126878217 | 2880319 | 99.306  |
| 2      | 27.808          | 886593    | 22681   | 0.694   |
| Total  |                 | 127764810 | 2903000 | 100.000 |



### HPLC Data of racemic **4h**

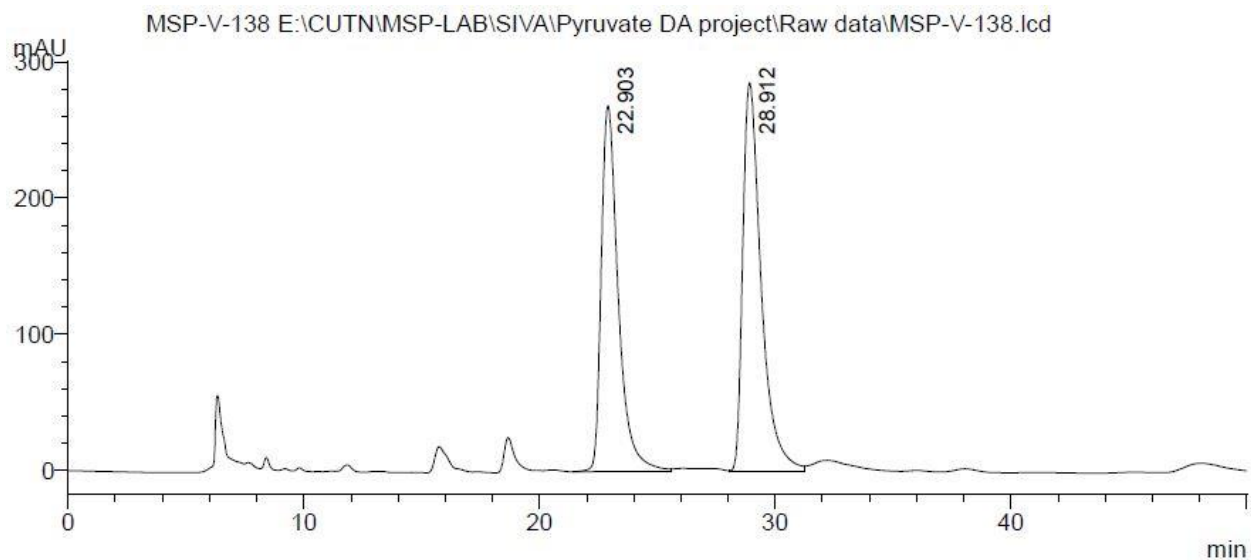

PDA Ch1 254nm

| Peak # | Ret. Time (min) | Area     | Height | Area%   |
|--------|-----------------|----------|--------|---------|
| 1      | 22.903          | 13494207 | 268550 | 46.522  |
| 2      | 28.912          | 15511765 | 285186 | 53.478  |
| Total  |                 | 29005972 | 553736 | 100.000 |

### HPLC Data of chiral **4h**: 99% *ee*

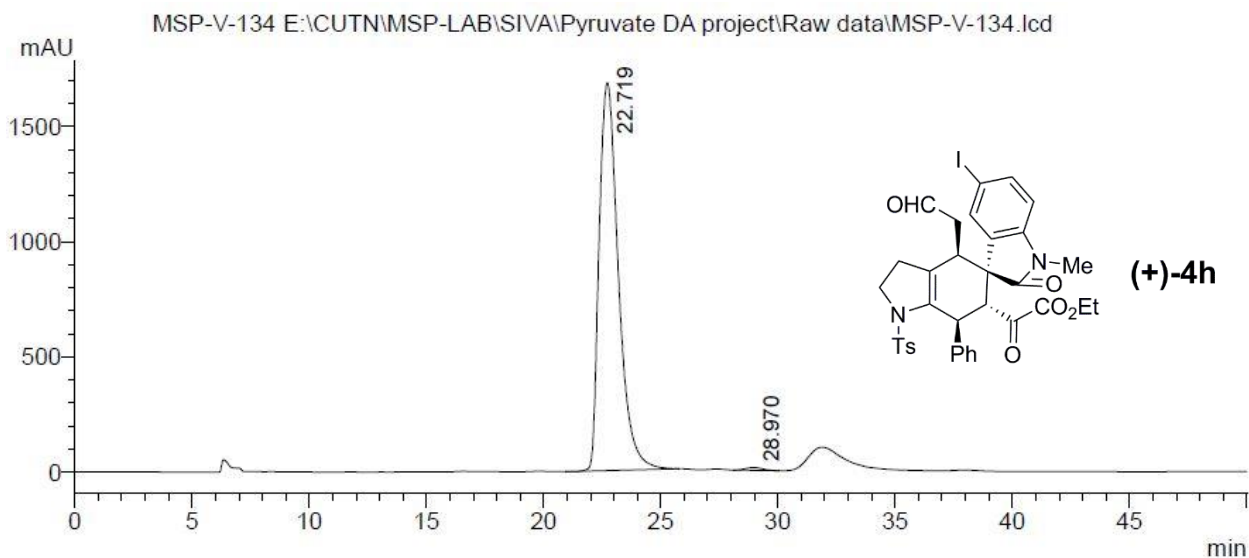

PDA Ch1 254nm

| Peak # | Ret. Time (min) | Area     | Height  | Area%   |
|--------|-----------------|----------|---------|---------|
| 1      | 22.719          | 96045149 | 1683468 | 99.401  |
| 2      | 28.970          | 579009   | 11442   | 0.599   |
| Total  |                 | 96624158 | 1694911 | 100.000 |

### HPLC Data of racemic **4i**

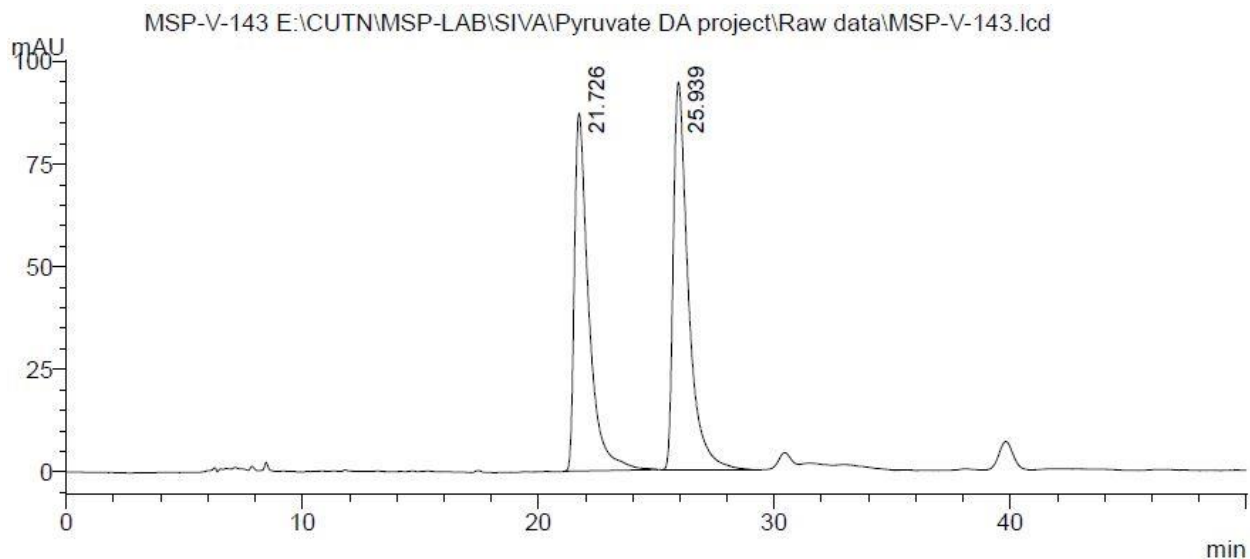

PDA Ch1 254nm

| Peak # | Ret. Time (min) | Area    | Height | Area%   |
|--------|-----------------|---------|--------|---------|
| 1      | 21.726          | 3695143 | 87247  | 46.857  |
| 2      | 25.939          | 4190790 | 94486  | 53.143  |
| Total  |                 | 7885933 | 181733 | 100.000 |

### HPLC Data of chiral **4i**: 99% *ee*

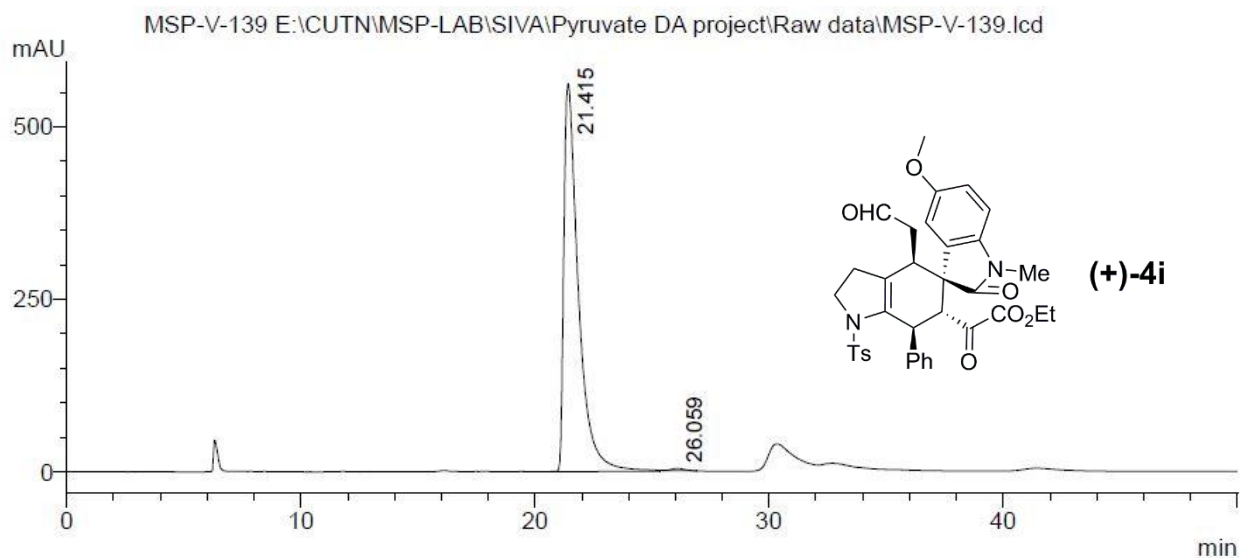

PDA Ch1 254nm

| Peak # | Ret. Time (min) | Area     | Height | Area%   |
|--------|-----------------|----------|--------|---------|
| 1      | 21.415          | 24286970 | 562109 | 99.526  |
| 2      | 26.059          | 115736   | 3024   | 0.474   |
| Total  |                 | 24402705 | 565132 | 100.000 |

### HPLC Data of racemic **4j**

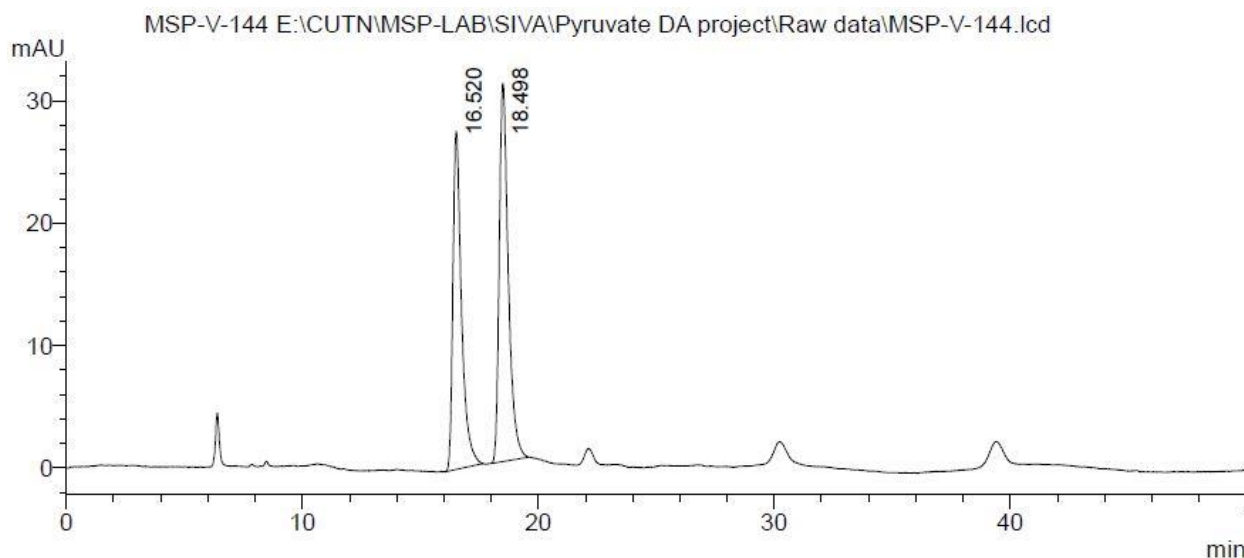

PDA Ch1 254nm

| Peak # | Ret. Time (min) | Area    | Height | Area%   |
|--------|-----------------|---------|--------|---------|
| 1      | 16.520          | 702254  | 27621  | 46.072  |
| 2      | 18.498          | 821989  | 30881  | 53.928  |
| Total  |                 | 1524243 | 58501  | 100.000 |

### HPLC Data of chiral **4j**: 98% *ee*

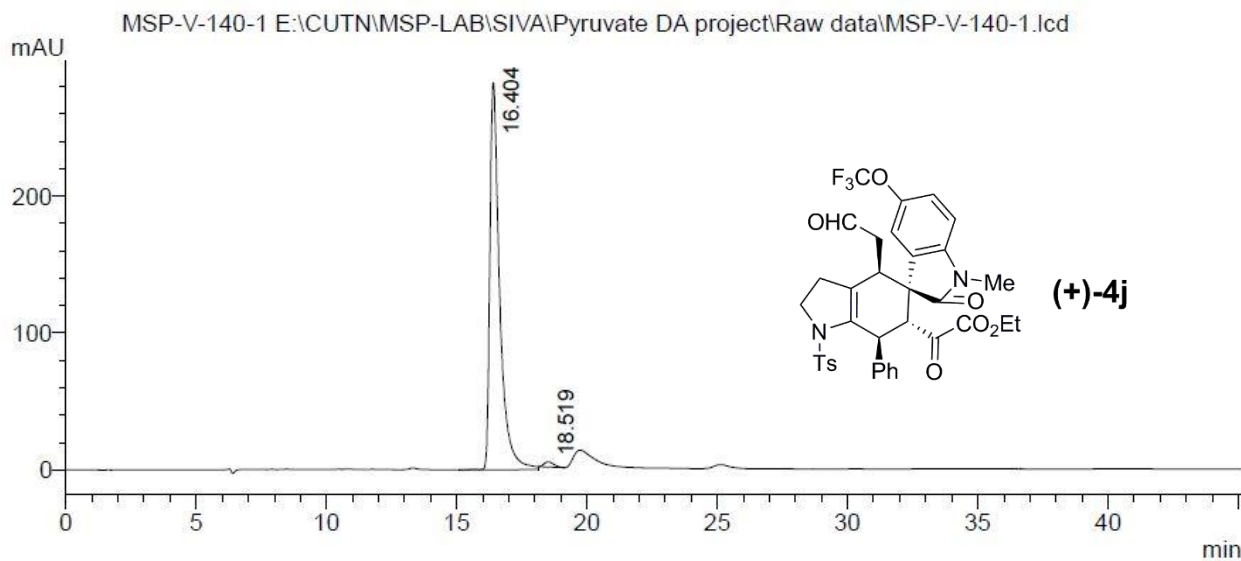

PDA Ch1 254nm

| Peak # | Ret. Time (min) | Area    | Height | Area%   |
|--------|-----------------|---------|--------|---------|
| 1      | 16.404          | 7416960 | 282704 | 98.757  |
| 2      | 18.519          | 93361   | 3598   | 1.243   |
| Total  |                 | 7510321 | 286302 | 100.000 |

### HPLC Data of racemic **4k**

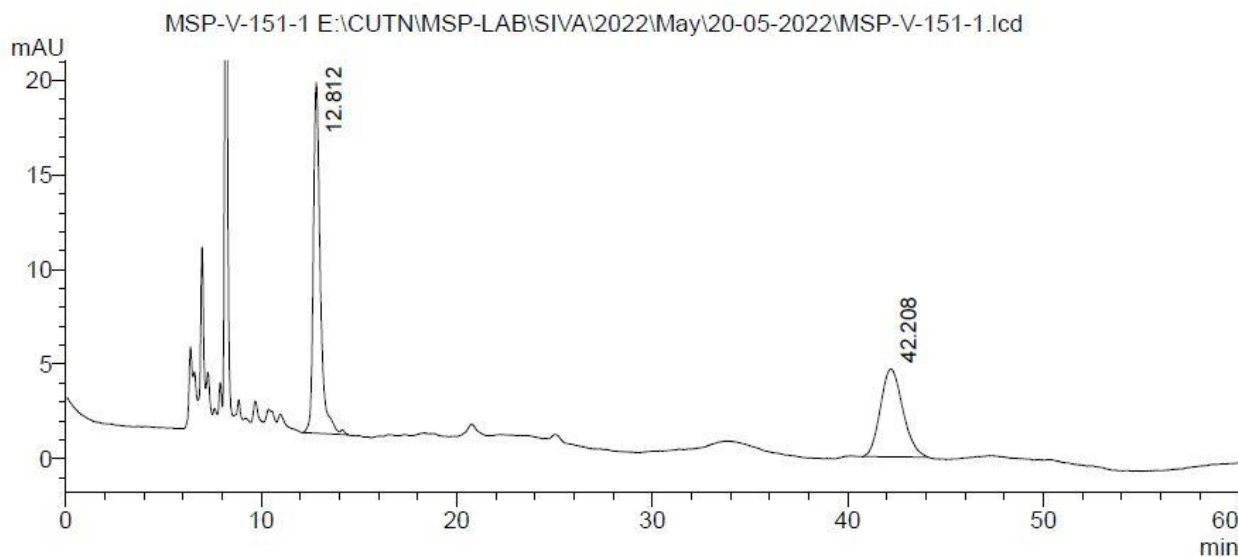

PDA Ch1 254nm

| Peak # | Ret. Time (min) | Area   | Height | Area%   |
|--------|-----------------|--------|--------|---------|
| 1      | 12.812          | 459767 | 18558  | 55.410  |
| 2      | 42.208          | 369988 | 4643   | 44.590  |
| Total  |                 | 829755 | 23201  | 100.000 |

### HPLC Data of chiral **4k:97% ee**

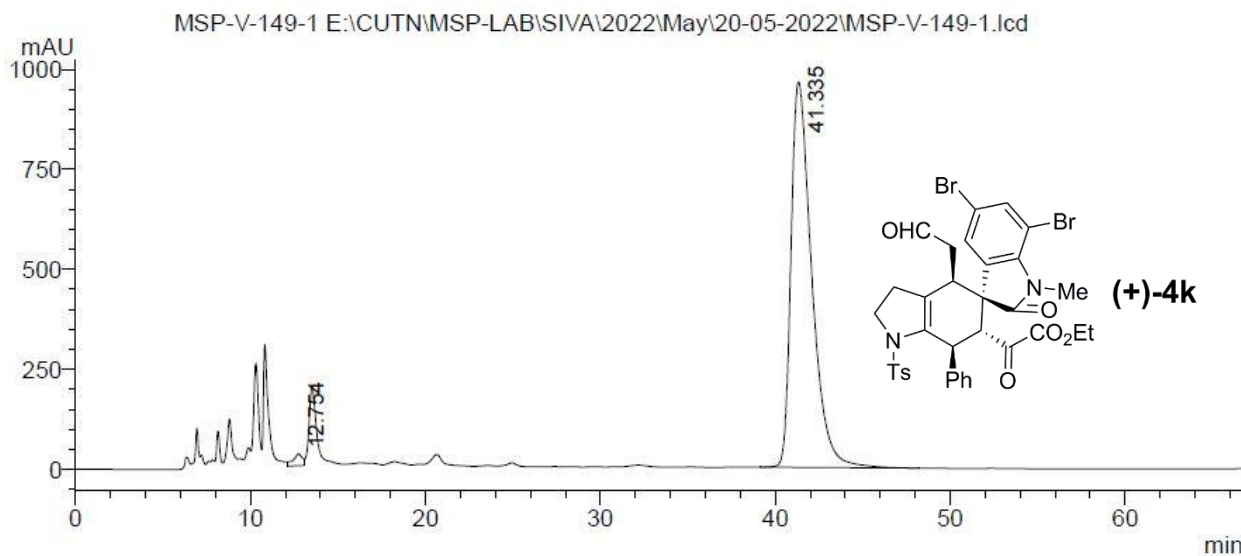

PDA Ch1 254nm

| Peak # | Ret. Time (min) | Area     | Height | Area%   |
|--------|-----------------|----------|--------|---------|
| 1      | 12.754          | 1096904  | 29477  | 1.366   |
| 2      | 41.335          | 79210155 | 963943 | 98.634  |
| Total  |                 | 80307058 | 993420 | 100.000 |

### HPLC Data of racemic **4I**

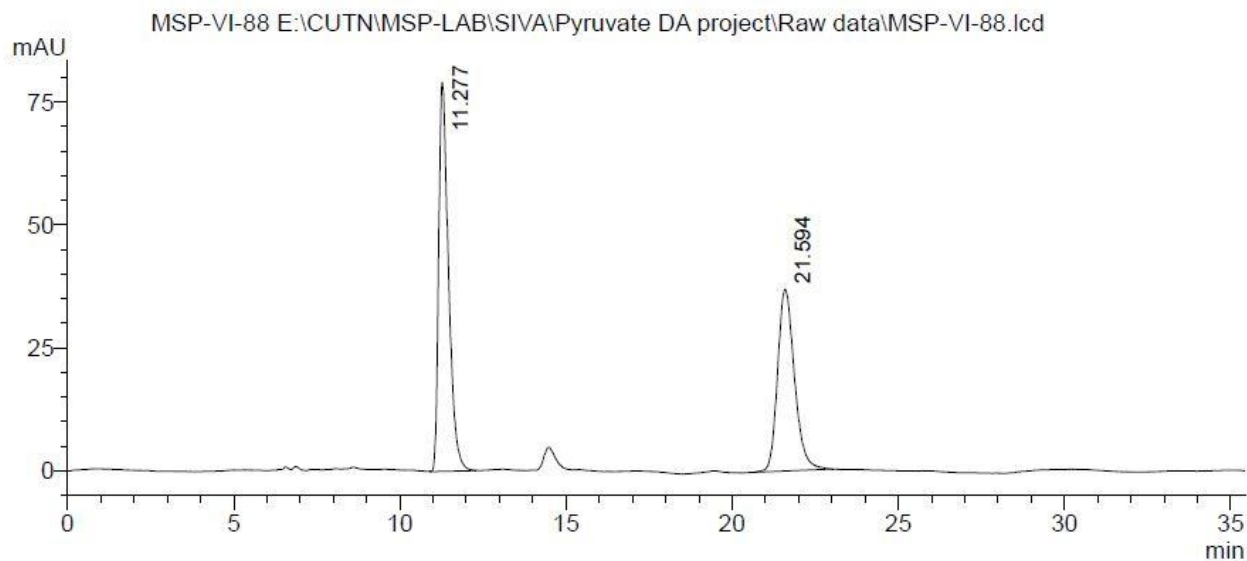

PDA Ch1 254nm

| Peak # | Ret. Time (min) | Area    | Height | Area%   |
|--------|-----------------|---------|--------|---------|
| 1      | 11.277          | 1625855 | 79096  | 55.441  |
| 2      | 21.594          | 1306742 | 36997  | 44.559  |
| Total  |                 | 2932598 | 116093 | 100.000 |

### HPLC Data of chiral **4I**: 97% *ee*

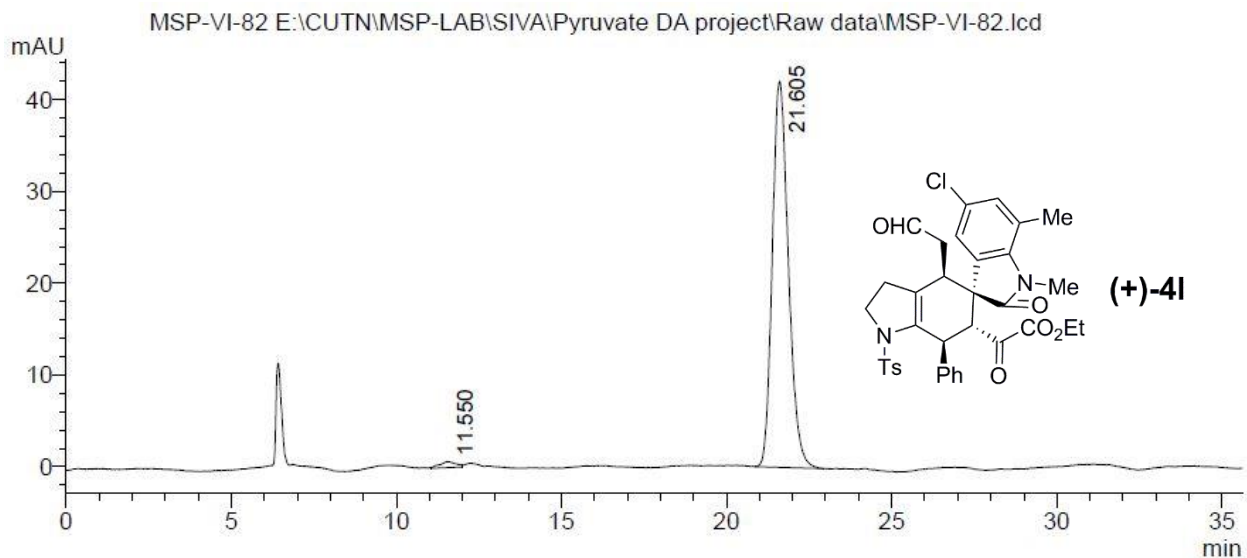

PDA Ch1 254nm

| Peak # | Ret. Time (min) | Area    | Height | Area%   |
|--------|-----------------|---------|--------|---------|
| 1      | 11.550          | 22037   | 664    | 1.523   |
| 2      | 21.605          | 1425341 | 42068  | 98.477  |
| Total  |                 | 1447377 | 42732  | 100.000 |

### HPLC Data of racemic **4m**

MSP-V-153 E:\CUTN\MSP-LAB\SIVA\2022\August\13-08-2022\MSP-V-153.lcd

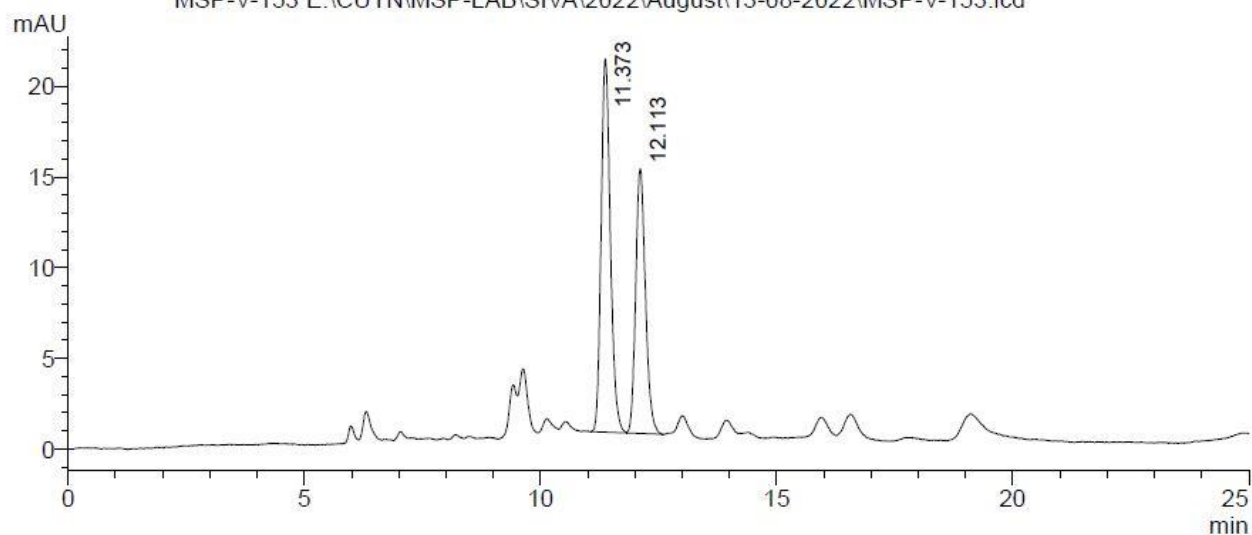

PDA Ch1 254nm

| Peak # | Ret. Time (min) | Area   | Height | Area%   |
|--------|-----------------|--------|--------|---------|
| 1      | 11.373          | 279890 | 20579  | 57.254  |
| 2      | 12.113          | 208965 | 14580  | 42.746  |
| Total  |                 | 488856 | 35159  | 100.000 |

### HPLC Data of chiral **4m**: 97% ee

MSP-VII-55 E:\CUTN\MSP-LAB\SIVA\2022\August\13-08-2022\MSP-VII-55.lcd

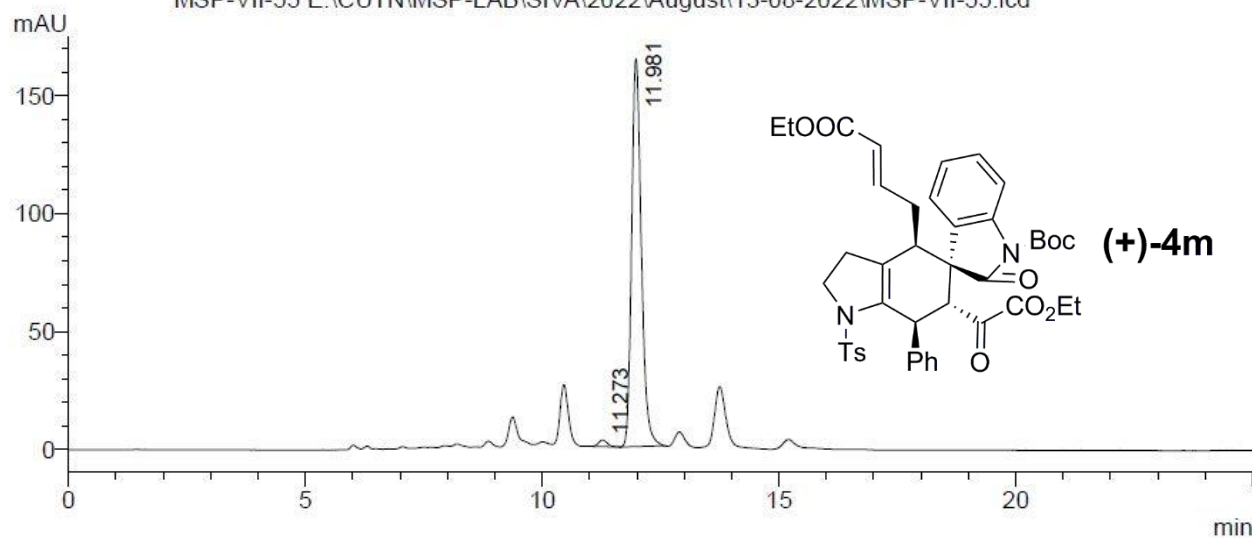

PDA Ch1 254nm

| Peak # | Ret. Time (min) | Area    | Height | Area%   |
|--------|-----------------|---------|--------|---------|
| 1      | 11.273          | 36177   | 2804   | 1.519   |
| 2      | 11.981          | 2345960 | 164432 | 98.481  |
| Total  |                 | 2382137 | 167236 | 100.000 |

### HPLC Data of racemic **4n**

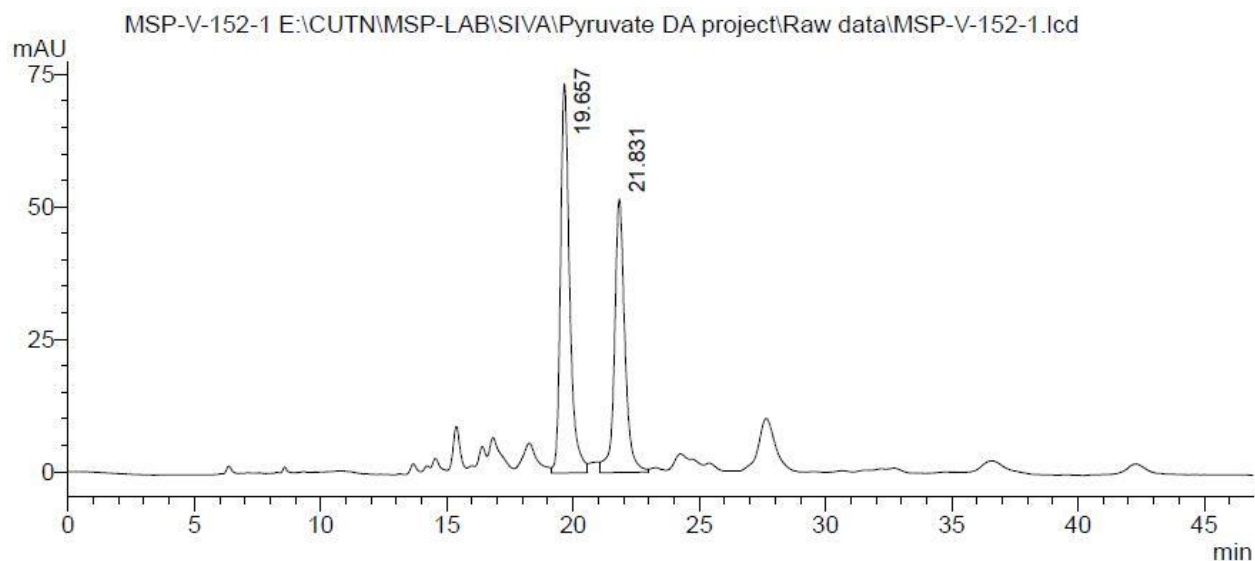

PDA Ch1 254nm

| Peak # | Ret. Time (min) | Area    | Height | Area%   |
|--------|-----------------|---------|--------|---------|
| 1      | 19.657          | 1858408 | 73486  | 55.929  |
| 2      | 21.831          | 1464390 | 51614  | 44.071  |
| Total  |                 | 3322798 | 125101 | 100.000 |

### HPLC Data of chiral **4n**: 93% *ee*

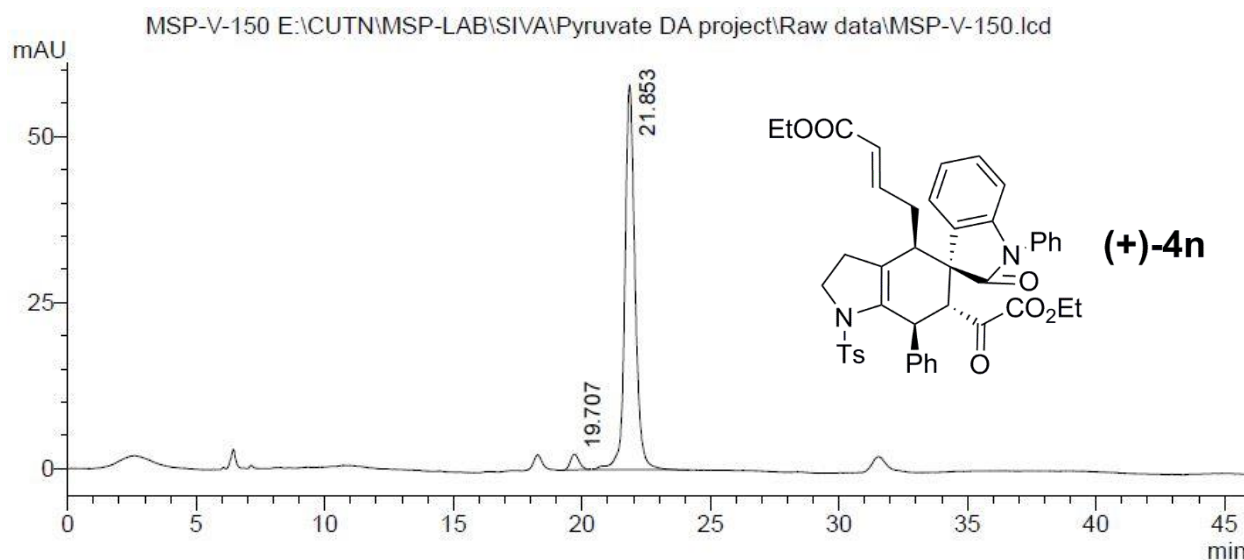

PDA Ch1 254nm

| Peak # | Ret. Time (min) | Area    | Height | Area%   |
|--------|-----------------|---------|--------|---------|
| 1      | 19.707          | 56855   | 2401   | 3.452   |
| 2      | 21.853          | 1590404 | 57954  | 96.548  |
| Total  |                 | 1647260 | 60355  | 100.000 |

### HPLC Data of racemic **4o**

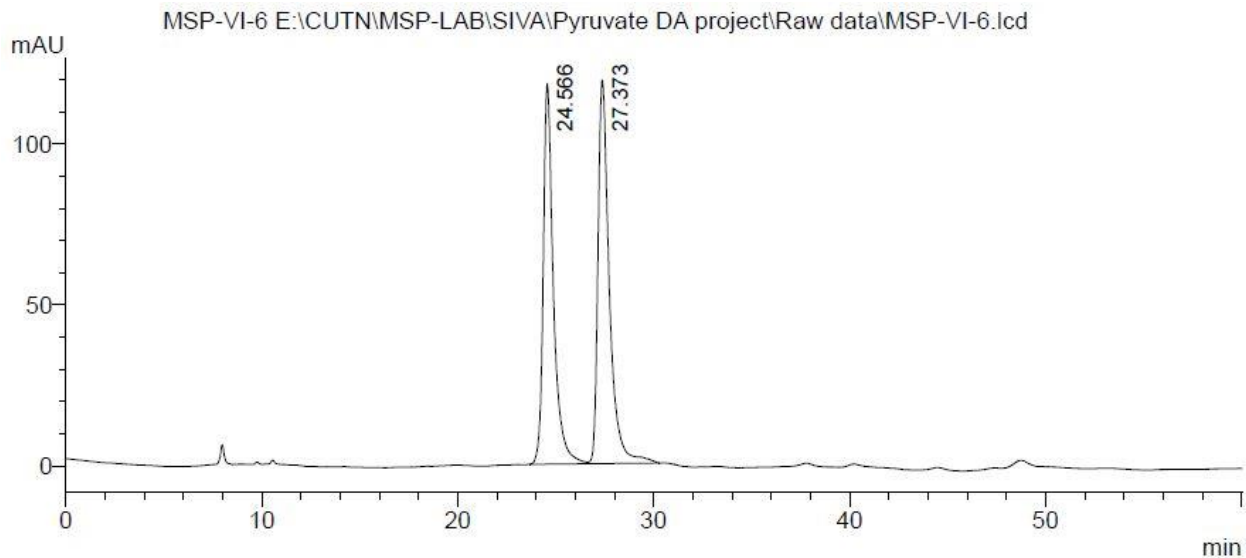

PDA Ch1 254nm

| Peak # | Ret. Time (min) | Area    | Height | Area%   |
|--------|-----------------|---------|--------|---------|
| 1      | 24.566          | 4266227 | 118310 | 47.057  |
| 2      | 27.373          | 4799946 | 119185 | 52.943  |
| Total  |                 | 9066174 | 237495 | 100.000 |

### HPLC Data of chiral **4o**: 97% ee

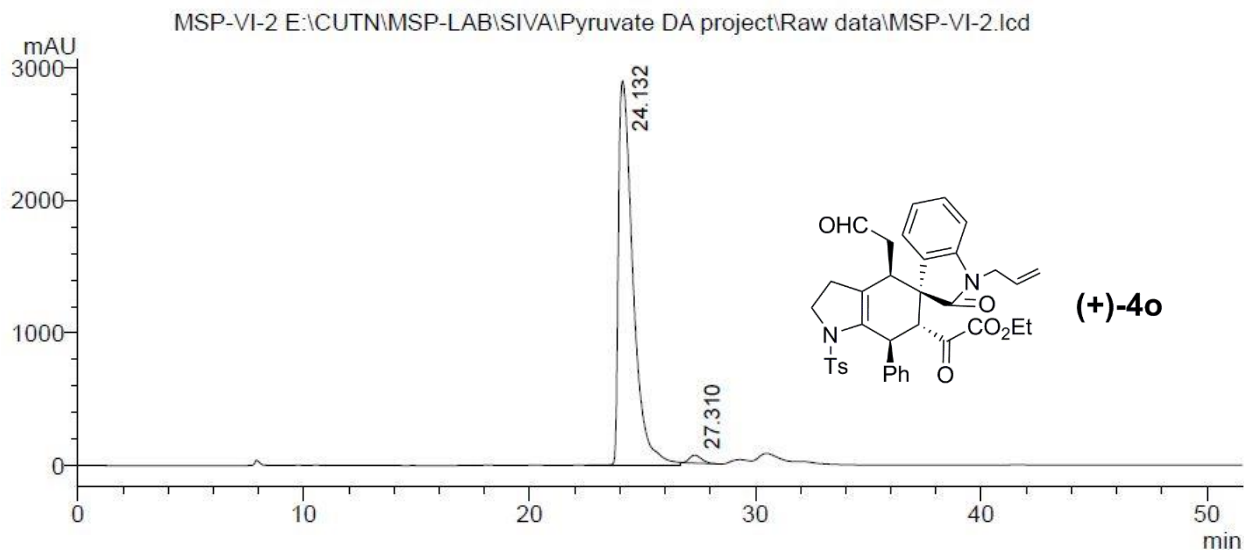

PDA Ch1 254nm

| Peak # | Ret. Time (min) | Area      | Height  | Area%   |
|--------|-----------------|-----------|---------|---------|
| 1      | 24.132          | 130015058 | 2901289 | 98.329  |
| 2      | 27.310          | 2209922   | 59913   | 1.671   |
| Total  |                 | 132224980 | 2961202 | 100.000 |



### HPLC Data of racemic **4p**

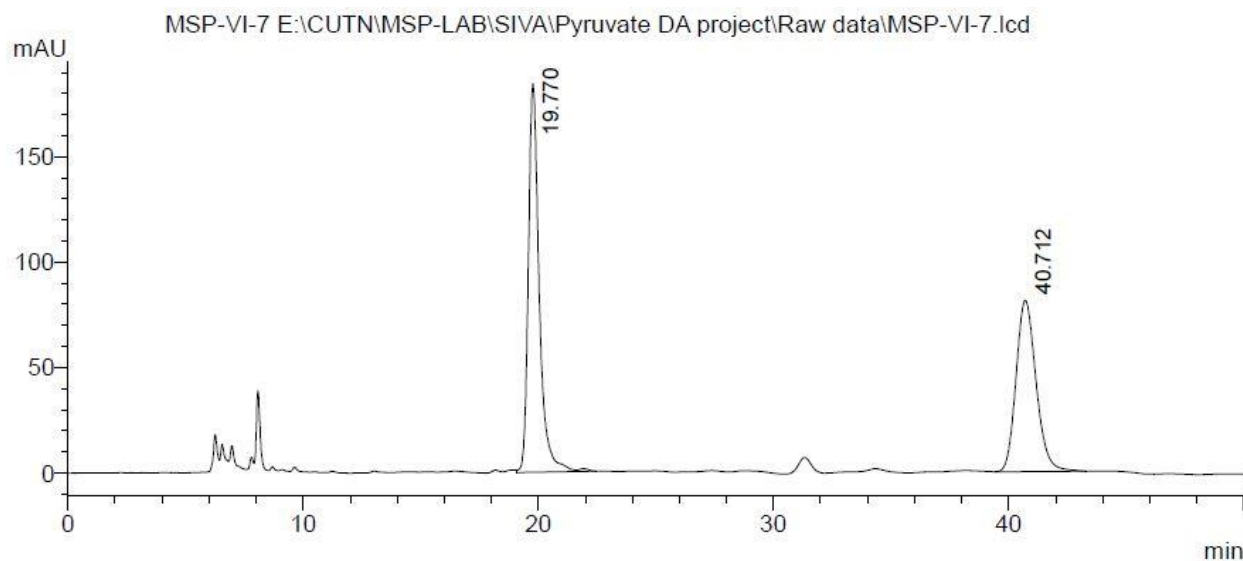

PDA Ch1 254nm

| Peak # | Ret. Time (min) | Area     | Height | Area%   |
|--------|-----------------|----------|--------|---------|
| 1      | 19.770          | 5923617  | 184255 | 55.194  |
| 2      | 40.712          | 4808792  | 81157  | 44.806  |
| Total  |                 | 10732409 | 265412 | 100.000 |

### HPLC Data of chiral **4p**: 96% *ee*

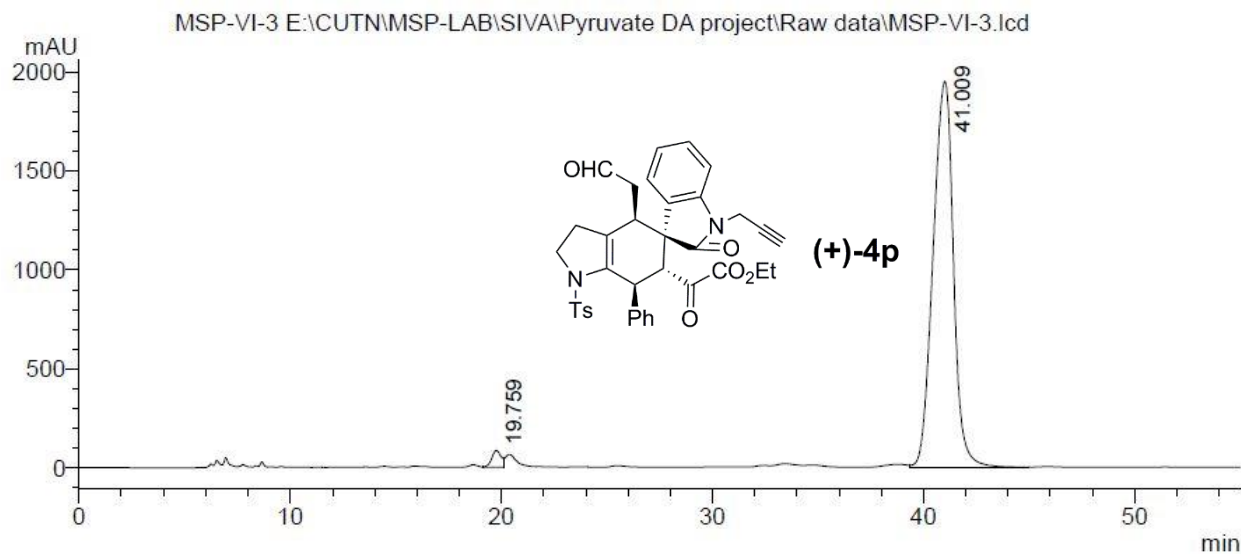

PDA Ch1 254nm

| Peak # | Ret. Time (min) | Area      | Height  | Area%   |
|--------|-----------------|-----------|---------|---------|
| 1      | 19.759          | 2607291   | 84909   | 1.957   |
| 2      | 41.009          | 130627432 | 1949677 | 98.043  |
| Total  |                 | 133234723 | 2034586 | 100.000 |

### HPLC Data of racemic **4q**

MSP-VI-8 E:\CUTN\MSP-LAB\SIVA\Pyruvate DA project\Raw data\MSP-VI-8.lcd

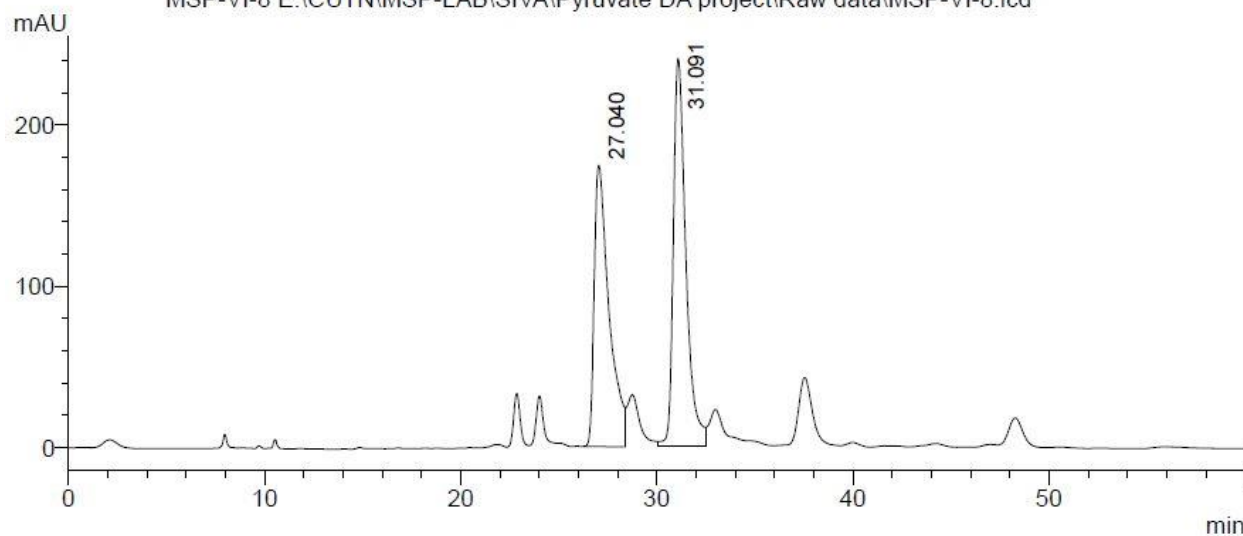

PDA Ch1 254nm

| Peak # | Ret. Time (min) | Area     | Height | Area%   |
|--------|-----------------|----------|--------|---------|
| 1      | 27.040          | 9182686  | 174350 | 46.127  |
| 2      | 31.091          | 10724617 | 240668 | 53.873  |
| Total  |                 | 19907304 | 415018 | 100.000 |

### HPLC Data of chiral **4q**: 99% *ee*

MSP-VI-4 E:\CUTN\MSP-LAB\SIVA\Pyruvate DA project\Raw data\MSP-VI-4.lcd

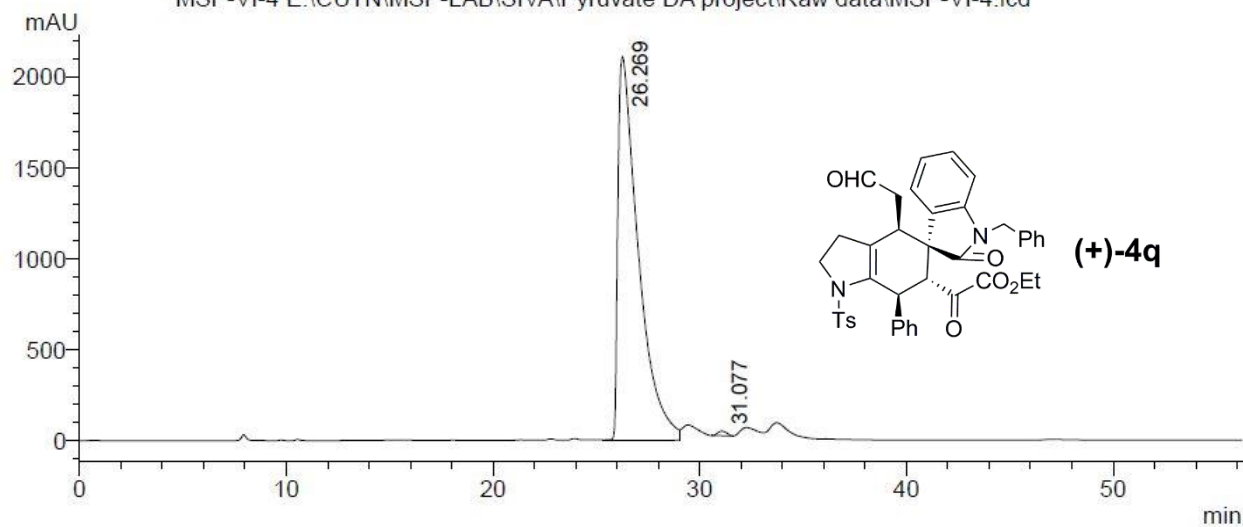

PDA Ch1 254nm

| Peak # | Ret. Time (min) | Area      | Height  | Area%   |
|--------|-----------------|-----------|---------|---------|
| 1      | 26.269          | 144786813 | 2111060 | 99.441  |
| 2      | 31.077          | 814239    | 26301   | 0.559   |
| Total  |                 | 145601052 | 2137361 | 100.000 |

### HPLC Data of racemic **4r**

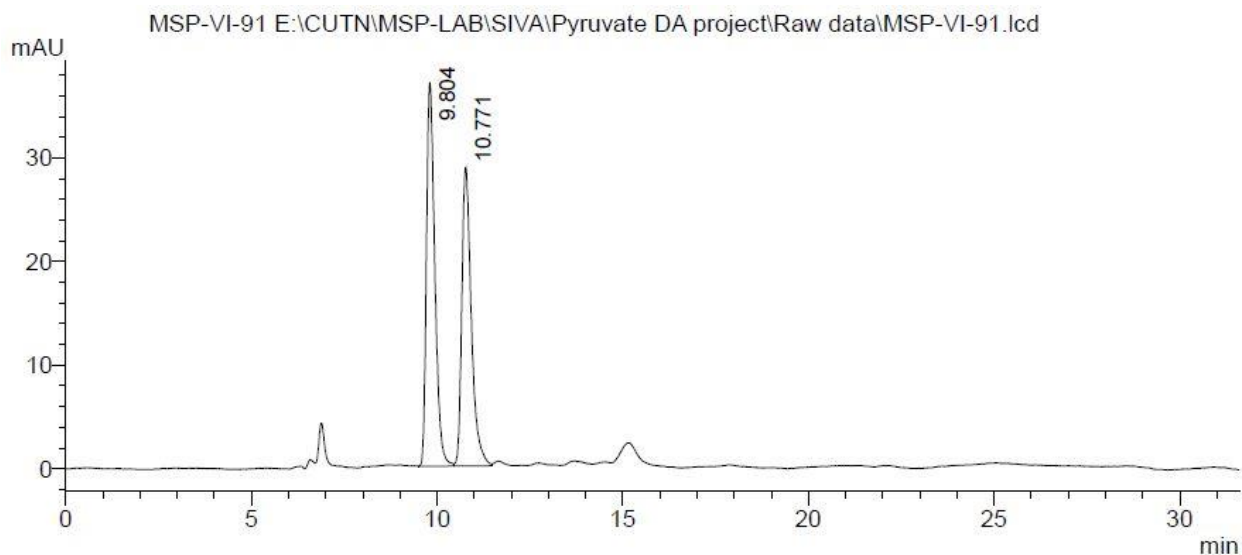

PDA Ch1 254nm

| Peak # | Ret. Time (min) | Area    | Height | Area%   |
|--------|-----------------|---------|--------|---------|
| 1      | 9.804           | 579972  | 37101  | 53.032  |
| 2      | 10.771          | 513645  | 28886  | 46.968  |
| Total  |                 | 1093617 | 65987  | 100.000 |

### HPLC Data of chiral **4r**: 98% ee

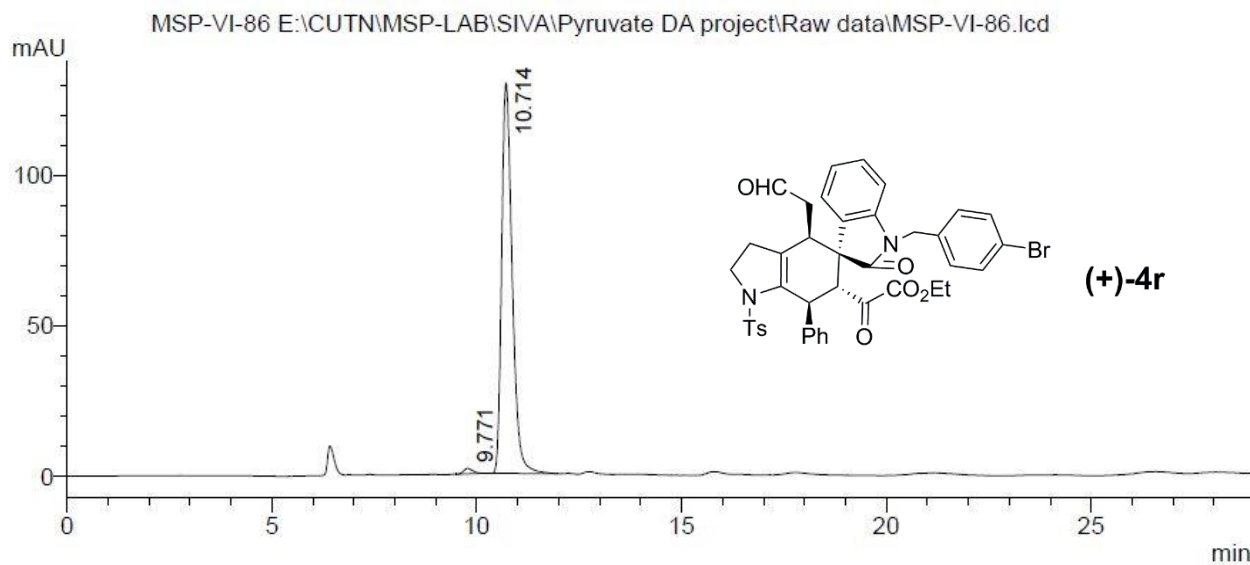

PDA Ch1 254nm

| Peak # | Ret. Time (min) | Area    | Height | Area%   |
|--------|-----------------|---------|--------|---------|
| 1      | 9.771           | 28132   | 1785   | 1.195   |
| 2      | 10.714          | 2326803 | 129683 | 98.805  |
| Total  |                 | 2354935 | 131468 | 100.000 |

### HPLC Data of racemic **4s**

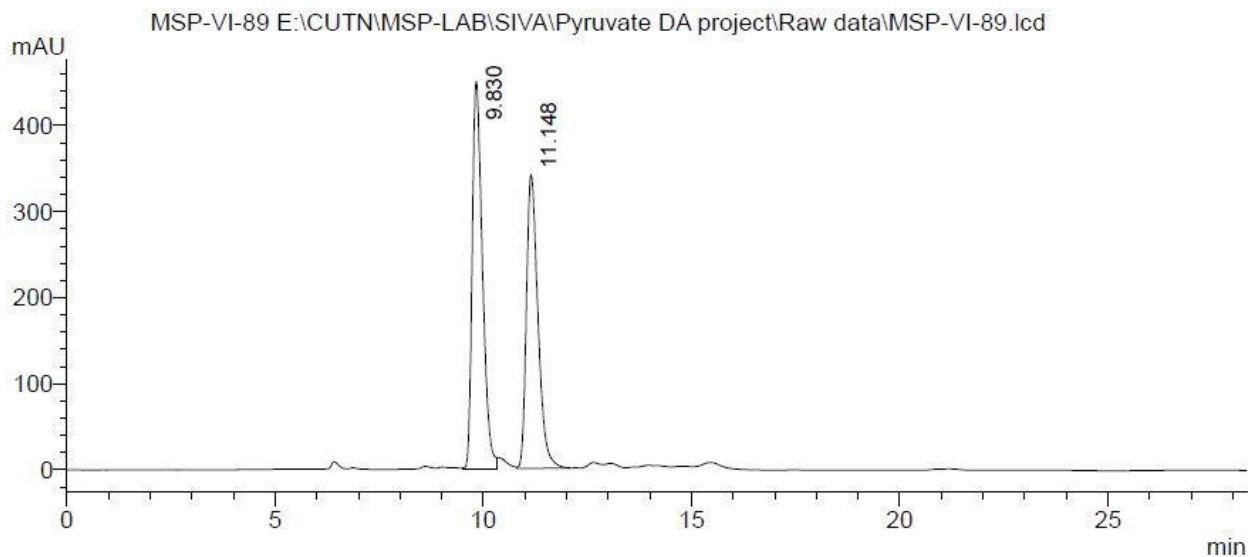

PDA Ch1 254nm

| Peak # | Ret. Time (min) | Area     | Height | Area%   |
|--------|-----------------|----------|--------|---------|
| 1      | 9.830           | 7676650  | 450117 | 53.894  |
| 2      | 11.148          | 6567374  | 341391 | 46.106  |
| Total  |                 | 14244024 | 791508 | 100.000 |

### HPLC Data of chiral **4s**: 97% ee

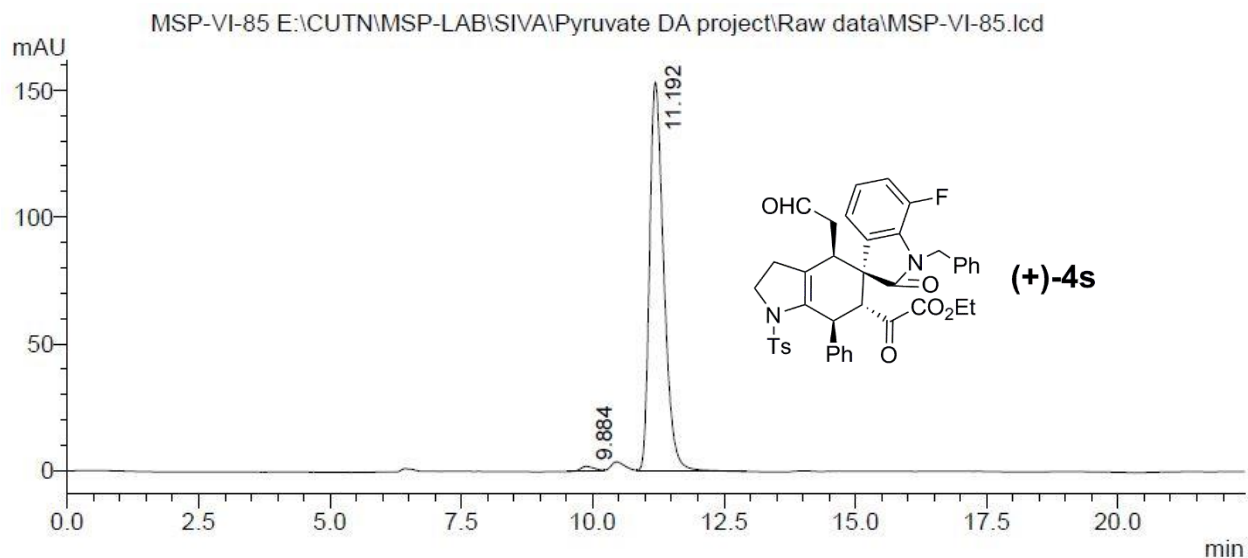

PDA Ch1 254nm

| Peak # | Ret. Time (min) | Area    | Height | Area%   |
|--------|-----------------|---------|--------|---------|
| 1      | 9.884           | 39175   | 2005   | 1.331   |
| 2      | 11.192          | 2903074 | 153403 | 98.669  |
| Total  |                 | 2942249 | 155409 | 100.000 |

### HPLC Data of racemic **4t**

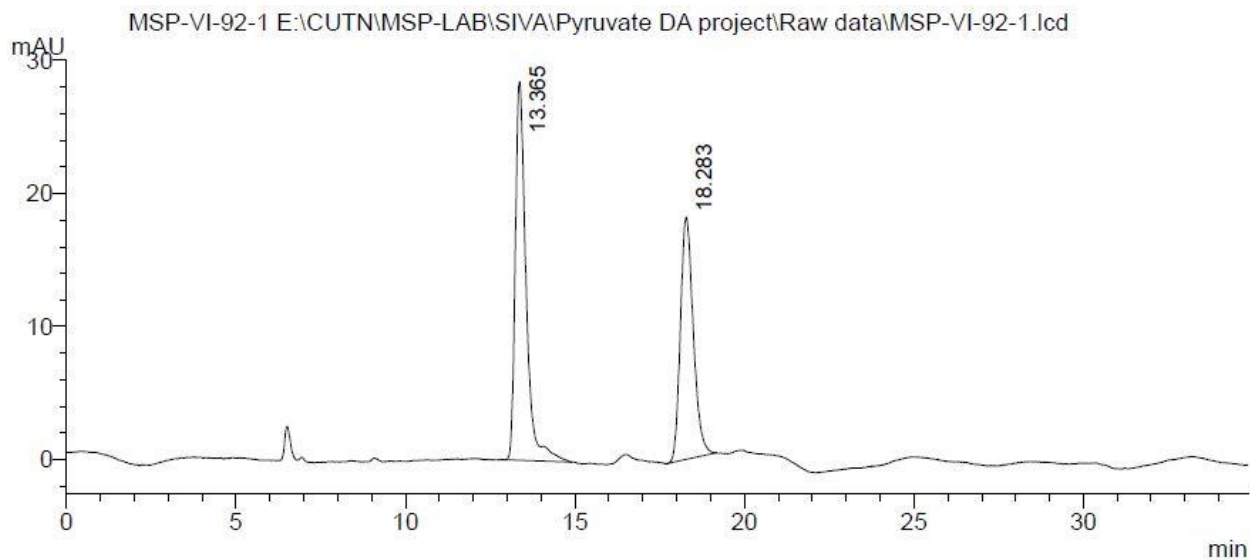

PDA Ch1 254nm

| Peak # | Ret. Time (min) | Area    | Height | Area%   |
|--------|-----------------|---------|--------|---------|
| 1      | 13.365          | 627572  | 28467  | 56.600  |
| 2      | 18.283          | 481211  | 18216  | 43.400  |
| Total  |                 | 1108782 | 46683  | 100.000 |

### HPLC Data of chiral **4t**: 98% *ee*

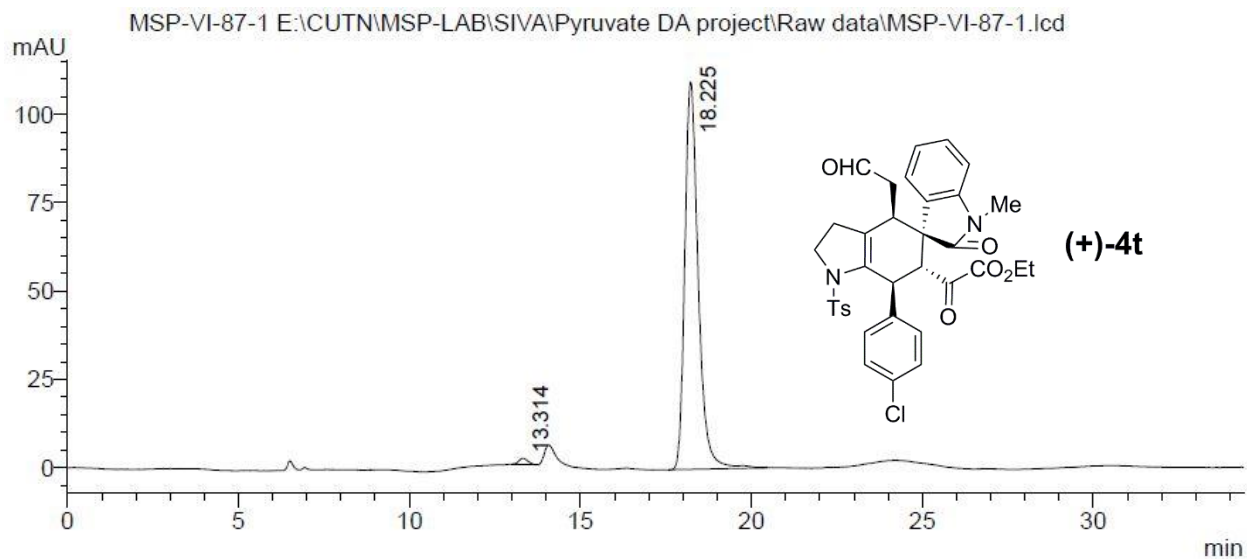

PDA Ch1 254nm

| Peak # | Ret. Time (min) | Area    | Height | Area%   |
|--------|-----------------|---------|--------|---------|
| 1      | 13.314          | 36686   | 1873   | 1.209   |
| 2      | 18.225          | 2998541 | 109630 | 98.791  |
| Total  |                 | 3035227 | 111504 | 100.000 |

### HPLC Data of racemic **4u**

MSP-VI-42 bottom major E:\CUTN\MSP-LAB\SIVA\2022\March\18-03-2022\MSP-VI-42 bottom major.lcd

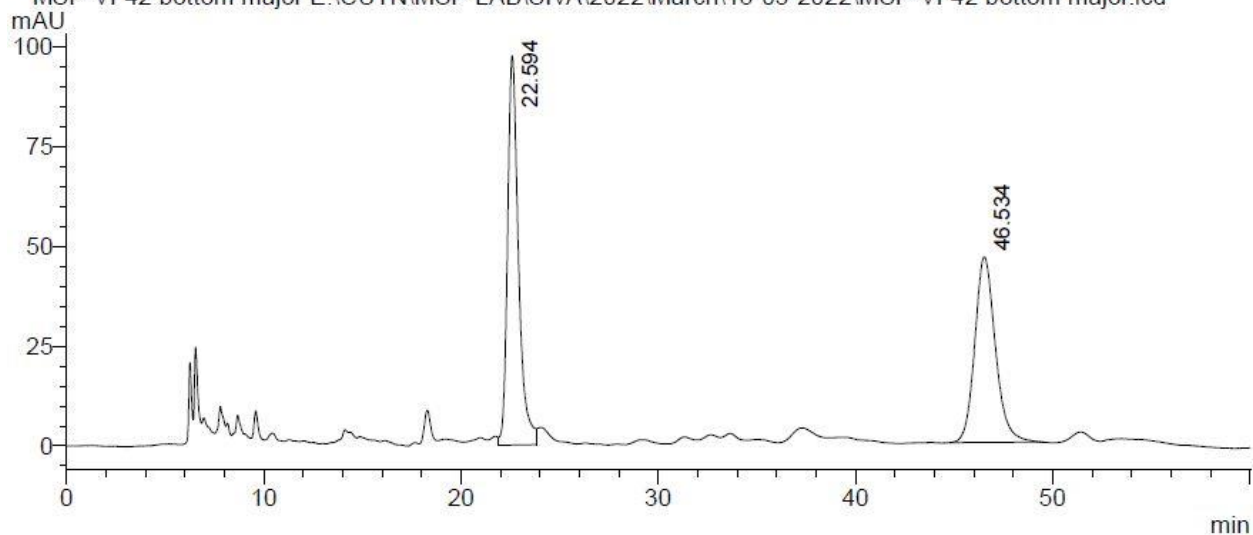

PDA Ch1 254nm

| Peak # | Ret. Time (min) | Area    | Height | Area%   |
|--------|-----------------|---------|--------|---------|
| 1      | 22.594          | 3734728 | 97383  | 52.484  |
| 2      | 46.534          | 3381157 | 46445  | 47.516  |
| Total  |                 | 7115885 | 143828 | 100.000 |

### HPLC Data of chiral **4u**: 97% ee

MSP-VI-40 bottom major-1 E:\CUTN\MSP-LAB\SIVA\Pyruvate DA project\Raw data\MSP-VI-40 bottom major-1.lcd

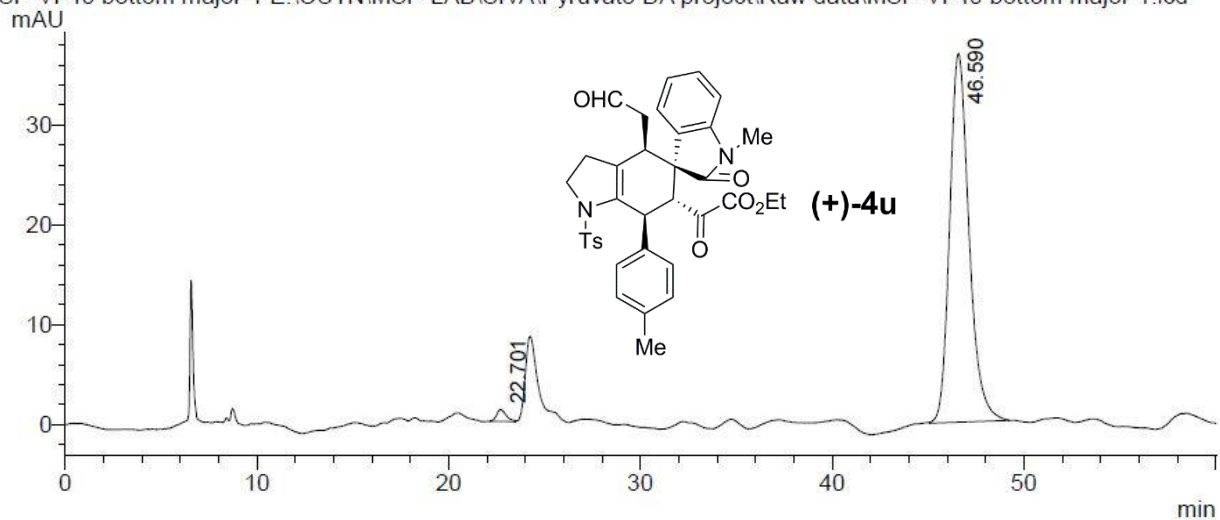

PDA Ch1 254nm

| Peak # | Ret. Time (min) | Area    | Height | Area%   |
|--------|-----------------|---------|--------|---------|
| 1      | 22.701          | 41256   | 1196   | 1.566   |
| 2      | 46.590          | 2593960 | 36912  | 98.434  |
| Total  |                 | 2635216 | 38108  | 100.000 |

### HPLC Data of racemic **4v**

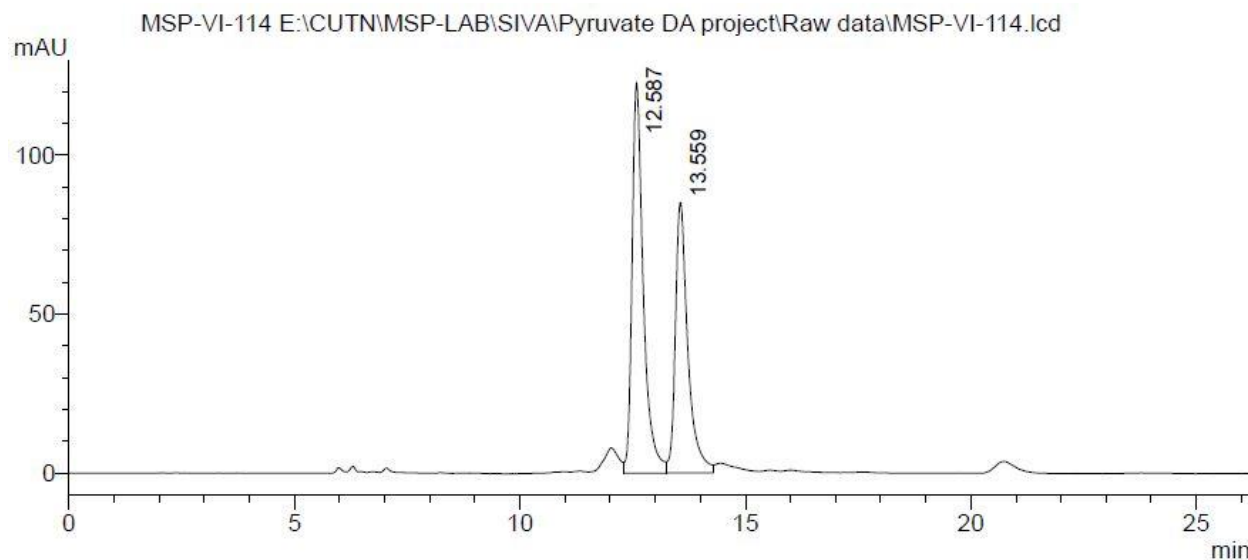

PDA Ch1 254nm

| Peak # | Ret. Time (min) | Area    | Height | Area%   |
|--------|-----------------|---------|--------|---------|
| 1      | 12.587          | 2131261 | 122679 | 56.533  |
| 2      | 13.559          | 1638652 | 85049  | 43.467  |
| Total  |                 | 3769913 | 207728 | 100.000 |

### HPLC Data of chiral **4v**: 95% *ee*

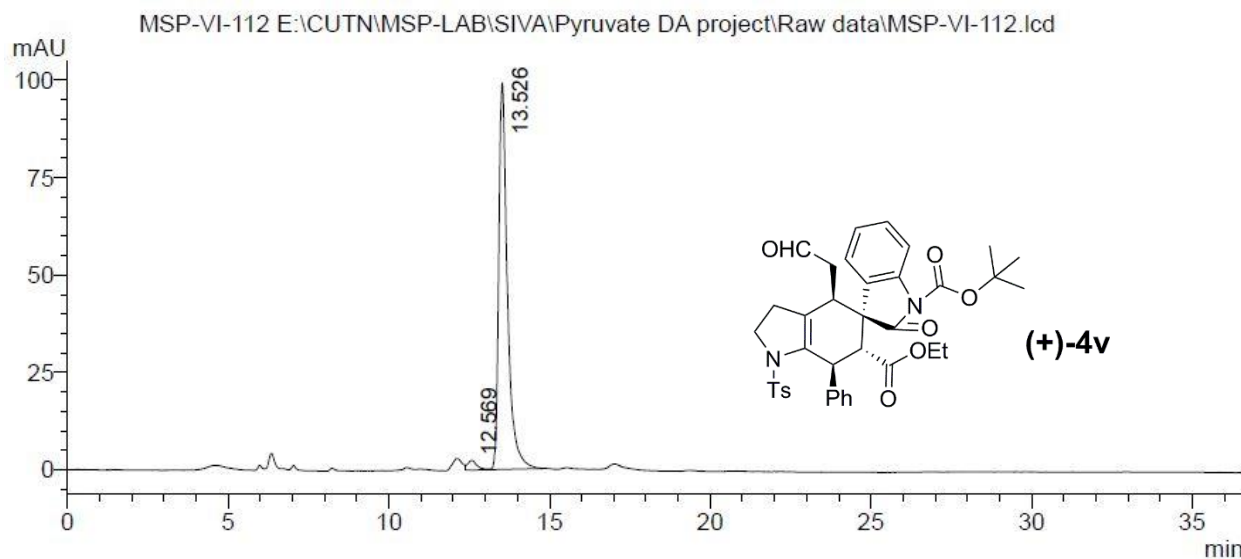

PDA Ch1 254nm

| Peak # | Ret. Time (min) | Area    | Height | Area%   |
|--------|-----------------|---------|--------|---------|
| 1      | 12.569          | 48943   | 2540   | 2.554   |
| 2      | 13.526          | 1867210 | 99287  | 97.446  |
| Total  |                 | 1916153 | 101826 | 100.000 |

### HPLC Data of racemic **4w**

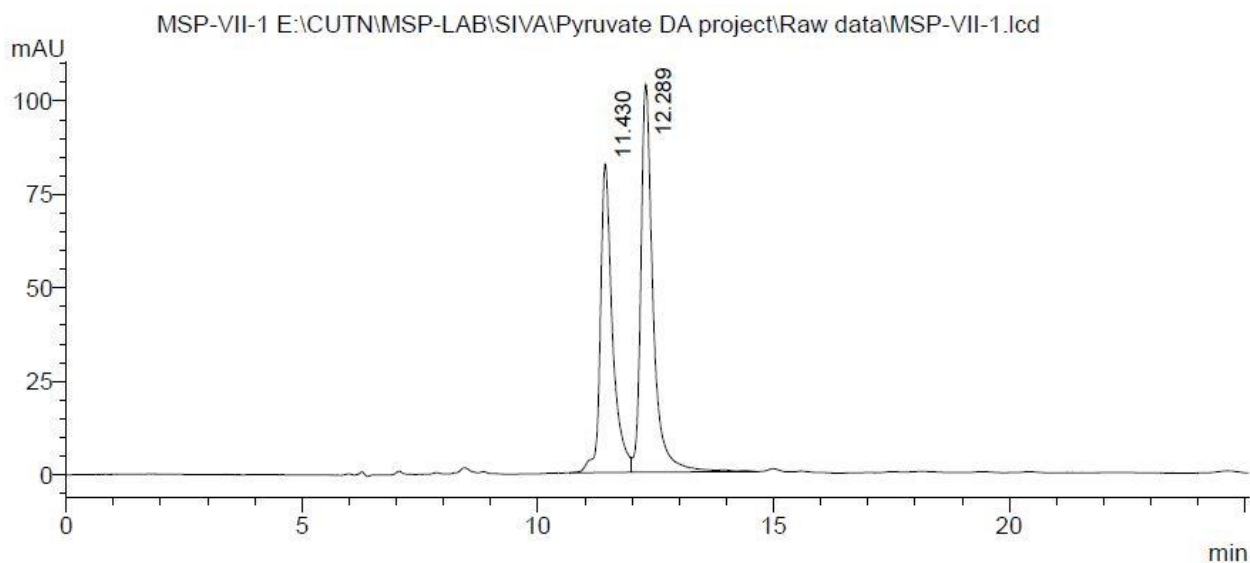

PDA Ch1 254nm

| Peak # | Ret. Time (min) | Area    | Height | Area%   |
|--------|-----------------|---------|--------|---------|
| 1      | 11.430          | 1474643 | 82497  | 44.089  |
| 2      | 12.289          | 1870070 | 103866 | 55.911  |
| Total  |                 | 3344713 | 186363 | 100.000 |

### HPLC Data of chiral **4w**: 91% ee

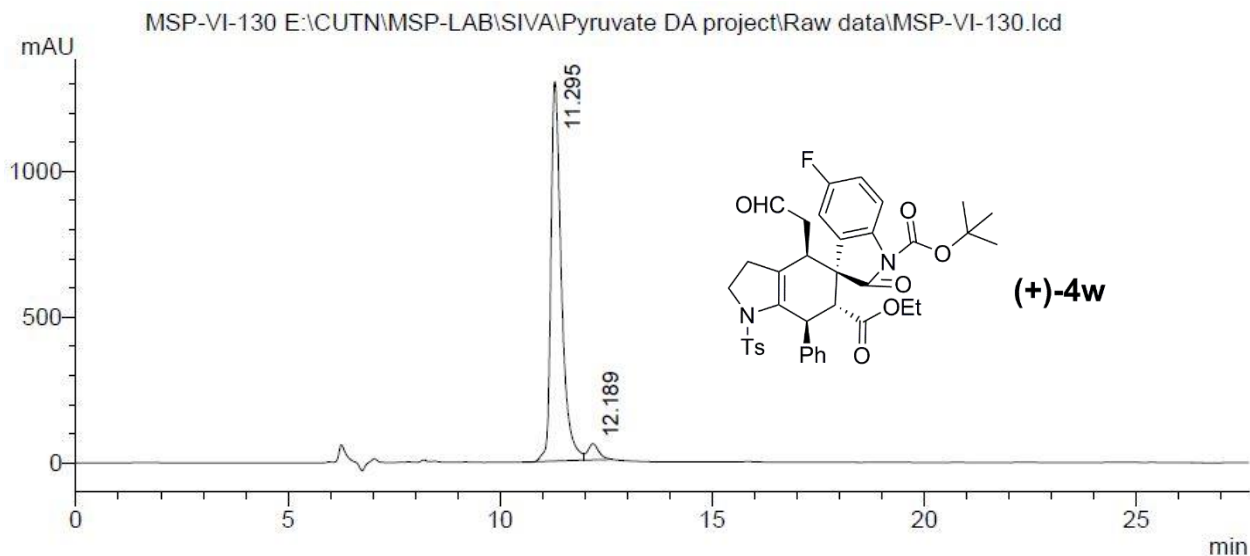

PDA Ch1 254nm

| Peak # | Ret. Time (min) | Area     | Height  | Area%   |
|--------|-----------------|----------|---------|---------|
| 1      | 11.295          | 22429980 | 1301467 | 95.654  |
| 2      | 12.189          | 1019043  | 55688   | 4.346   |
| Total  |                 | 23449023 | 1357156 | 100.000 |



### HPLC Data of racemic **4x**

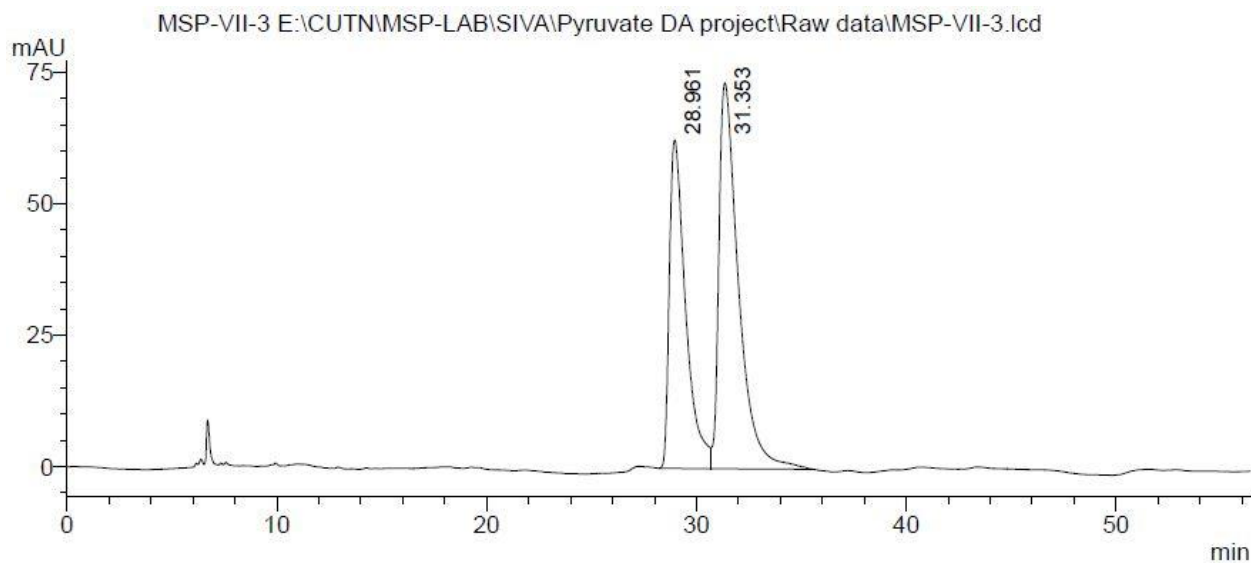

PDA Ch1 254nm

| Peak # | Ret. Time (min) | Area    | Height | Area%   |
|--------|-----------------|---------|--------|---------|
| 1      | 28.961          | 3381029 | 62456  | 41.546  |
| 2      | 31.353          | 4756943 | 73376  | 58.454  |
| Total  |                 | 8137972 | 135832 | 100.000 |

### HPLC Data of chiral **4x**: 93% *ee*

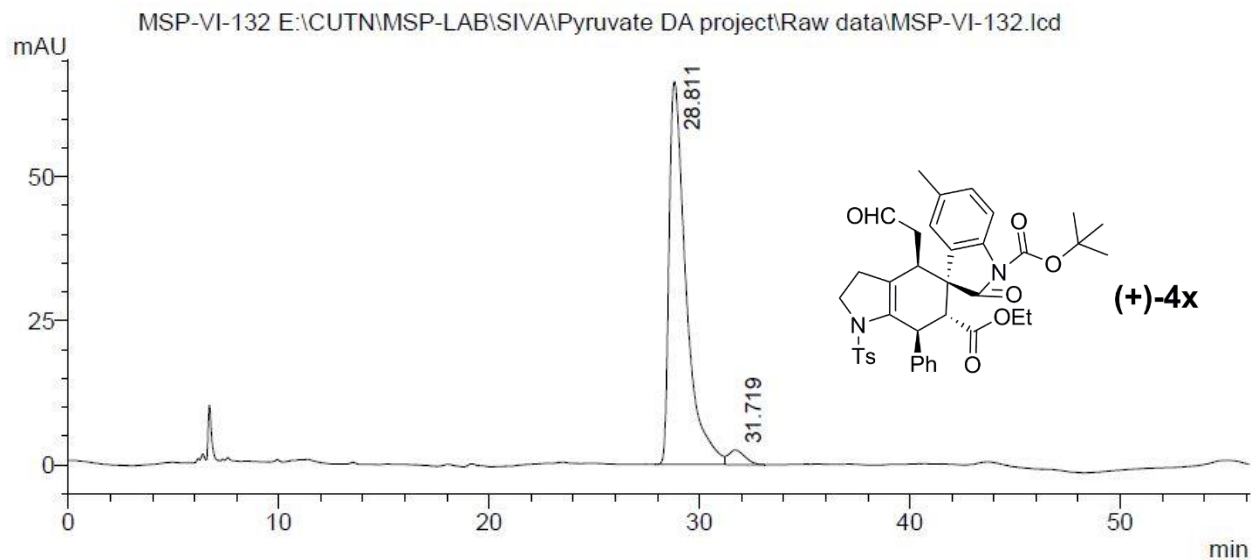

PDA Ch1 254nm

| Peak # | Ret. Time (min) | Area    | Height | Area%   |
|--------|-----------------|---------|--------|---------|
| 1      | 28.811          | 3701980 | 66382  | 96.316  |
| 2      | 31.719          | 141610  | 2526   | 3.684   |
| Total  |                 | 3843590 | 68908  | 100.000 |

### HPLC Data of racemic **4y**

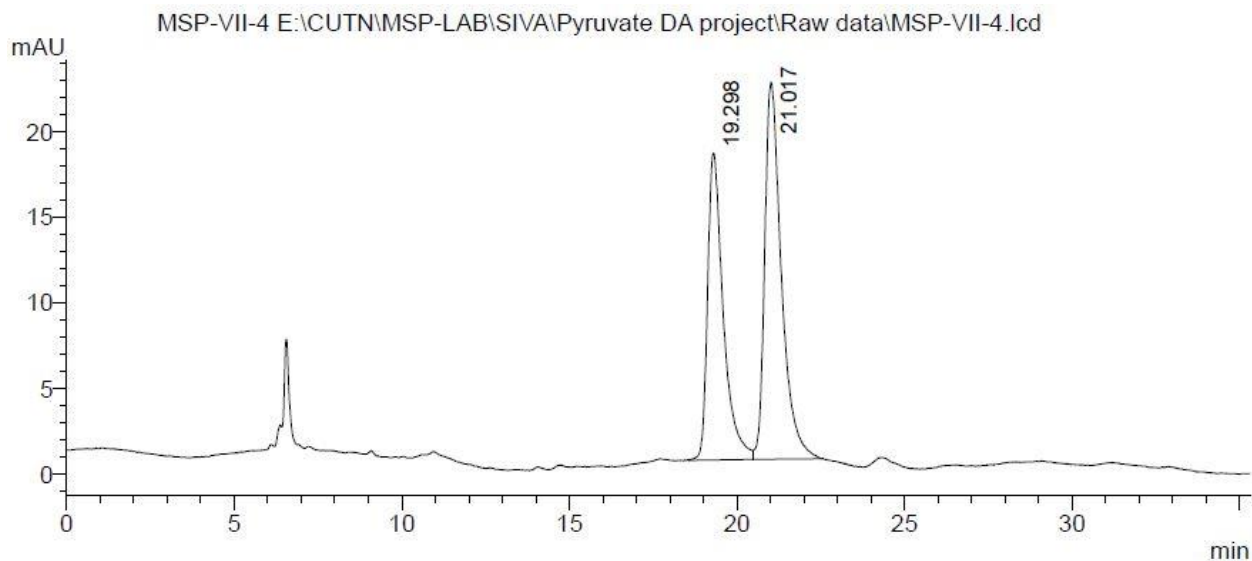

PDA Ch1 254nm

| Peak # | Ret. Time (min) | Area    | Height | Area%   |
|--------|-----------------|---------|--------|---------|
| 1      | 19.298          | 584297  | 17946  | 43.348  |
| 2      | 21.017          | 763615  | 22038  | 56.652  |
| Total  |                 | 1347912 | 39984  | 100.000 |

### HPLC Data of chiral **4y**: 94% *ee*

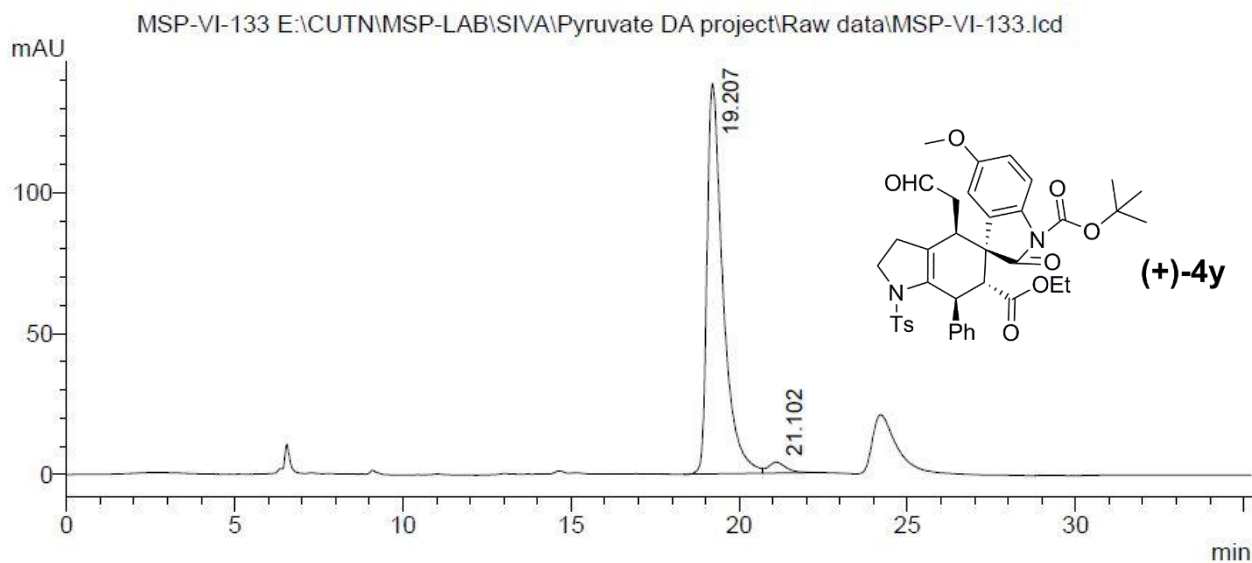

PDA Ch1 254nm

| Peak # | Ret. Time (min) | Area    | Height | Area%   |
|--------|-----------------|---------|--------|---------|
| 1      | 19.207          | 4566071 | 138487 | 96.969  |
| 2      | 21.102          | 142716  | 3872   | 3.031   |
| Total  |                 | 4708787 | 142359 | 100.000 |

### HPLC Data of racemic **4z**

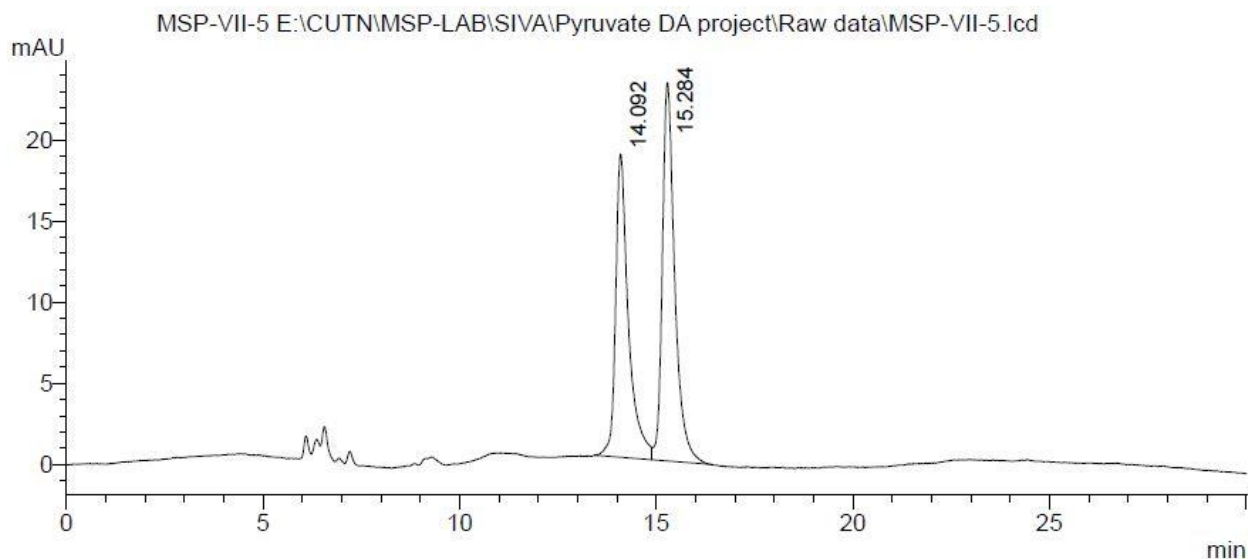

PDA Ch1 254nm

| Peak # | Ret. Time (min) | Area   | Height | Area%   |
|--------|-----------------|--------|--------|---------|
| 1      | 14.092          | 424537 | 18694  | 45.390  |
| 2      | 15.284          | 510764 | 23318  | 54.610  |
| Total  |                 | 935301 | 42012  | 100.000 |

### HPLC Data of chiral **4z**: 92% *ee*

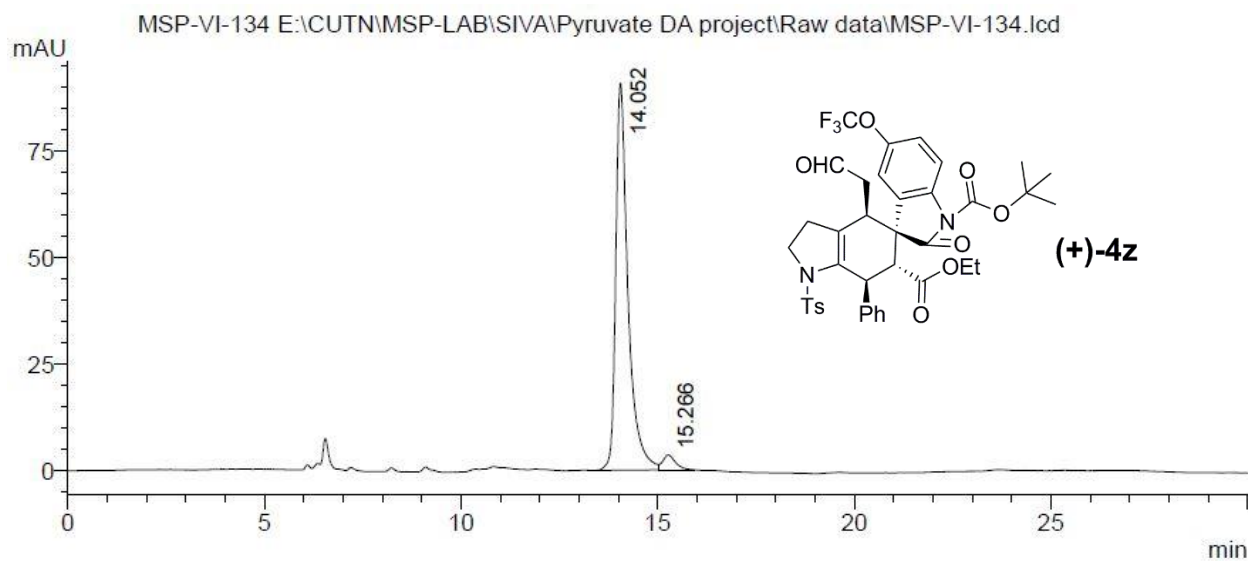

PDA Ch1 254nm

| Peak # | Ret. Time (min) | Area    | Height | Area%   |
|--------|-----------------|---------|--------|---------|
| 1      | 14.052          | 1963680 | 90748  | 96.075  |
| 2      | 15.266          | 80218   | 3502   | 3.925   |
| Total  |                 | 2043898 | 94250  | 100.000 |

### HPLC Data of racemic **4a'**

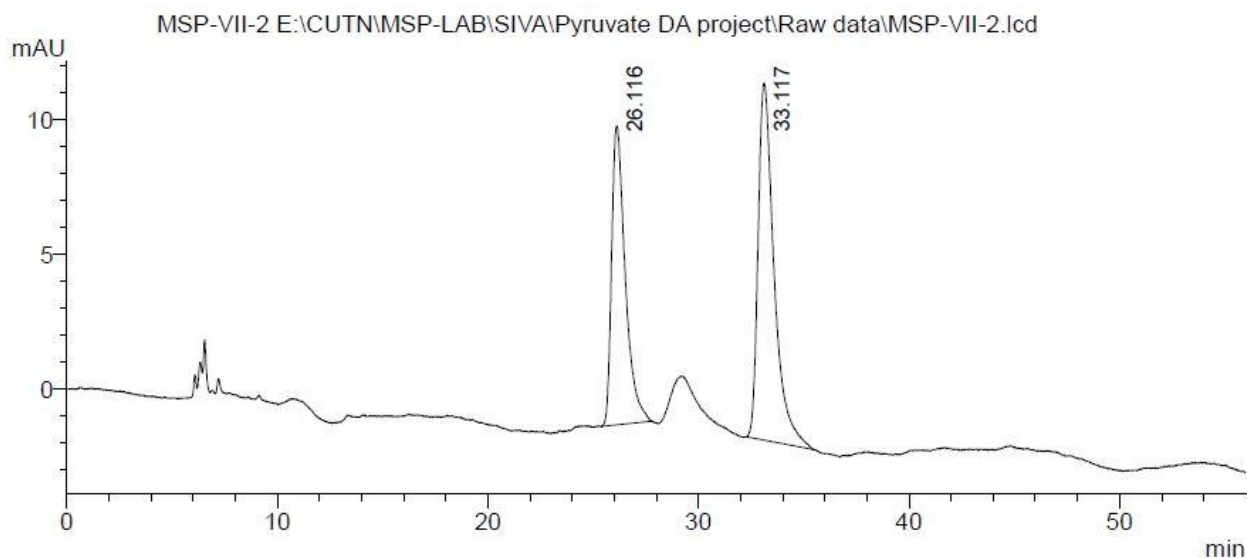

PDA Ch1 254nm

| Peak # | Ret. Time (min) | Area    | Height | Area%   |
|--------|-----------------|---------|--------|---------|
| 1      | 26.116          | 499643  | 11112  | 41.737  |
| 2      | 33.117          | 697480  | 13265  | 58.263  |
| Total  |                 | 1197123 | 24377  | 100.000 |

### HPLC Data of chiral **4a'**: 95% *ee*

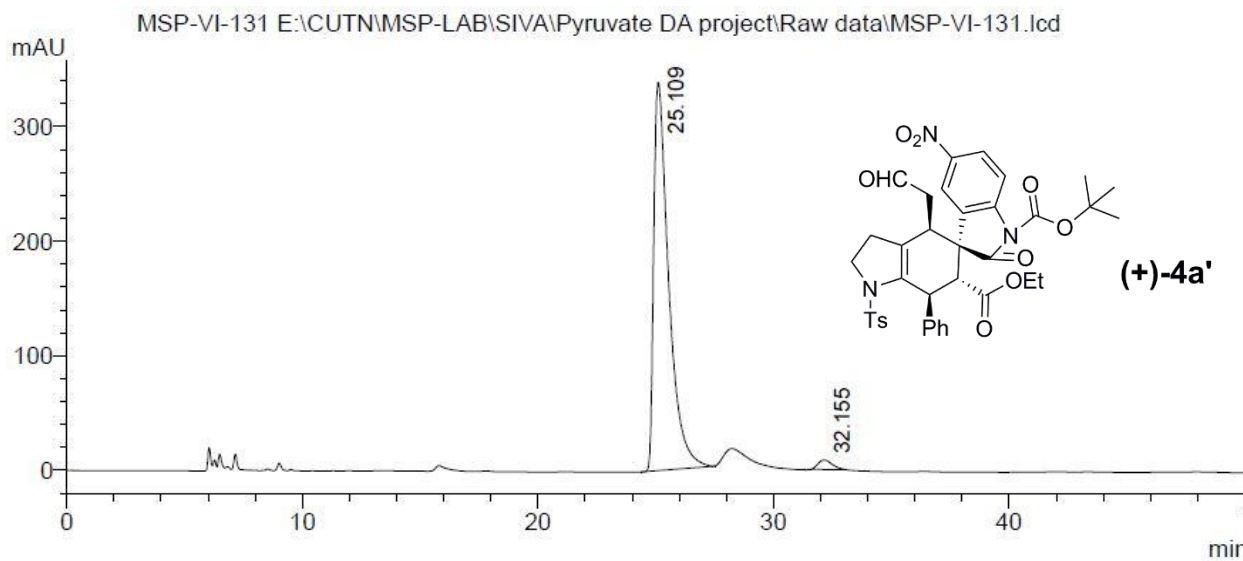

PDA Ch1 254nm

| Peak # | Ret. Time (min) | Area     | Height | Area%   |
|--------|-----------------|----------|--------|---------|
| 1      | 25.109          | 14912420 | 338477 | 97.688  |
| 2      | 32.155          | 352887   | 8345   | 2.312   |
| Total  |                 | 15265308 | 346823 | 100.000 |

### HPLC Data of racemic **4b'**

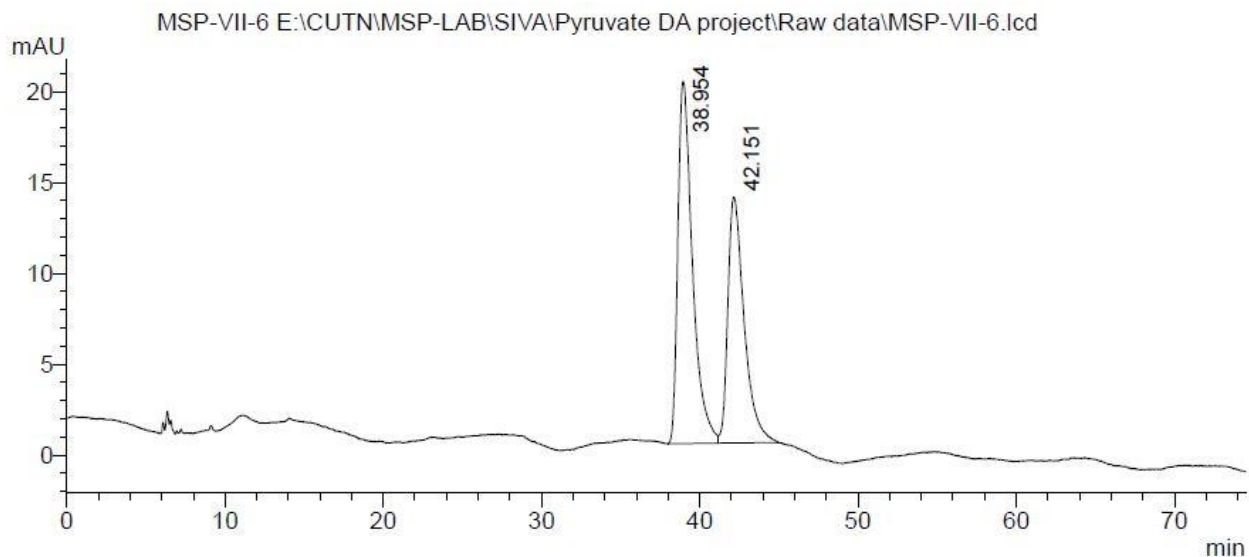

PDA Ch1 254nm

| Peak # | Ret. Time (min) | Area    | Height | Area%   |
|--------|-----------------|---------|--------|---------|
| 1      | 38.954          | 1279731 | 19928  | 56.897  |
| 2      | 42.151          | 969492  | 13534  | 43.103  |
| Total  |                 | 2249223 | 33462  | 100.000 |

### HPLC Data of chiral **4b'**: 98% ee

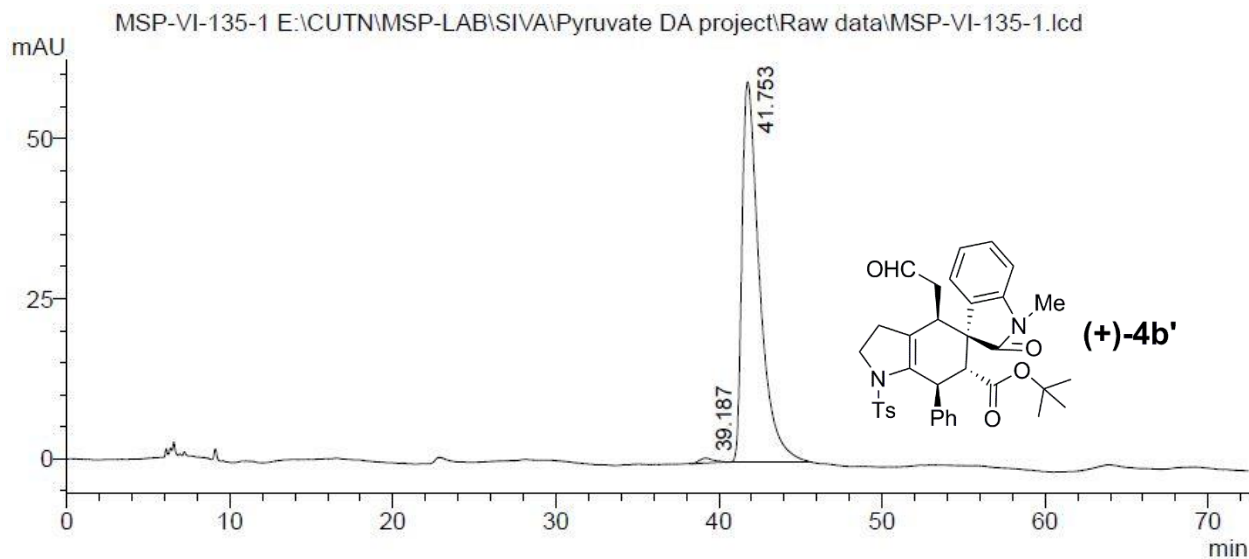

PDA Ch1 254nm

| Peak # | Ret. Time (min) | Area    | Height | Area%   |
|--------|-----------------|---------|--------|---------|
| 1      | 39.187          | 44668   | 771    | 0.993   |
| 2      | 41.753          | 4455235 | 59354  | 99.007  |
| Total  |                 | 4499903 | 60124  | 100.000 |

### HPLC Data of racemic 4'a

MSP-VII-31 E:\CUTN\MSP-LAB\SIVA\2022\July\27-07-2022\MSP-VII-31.lcd

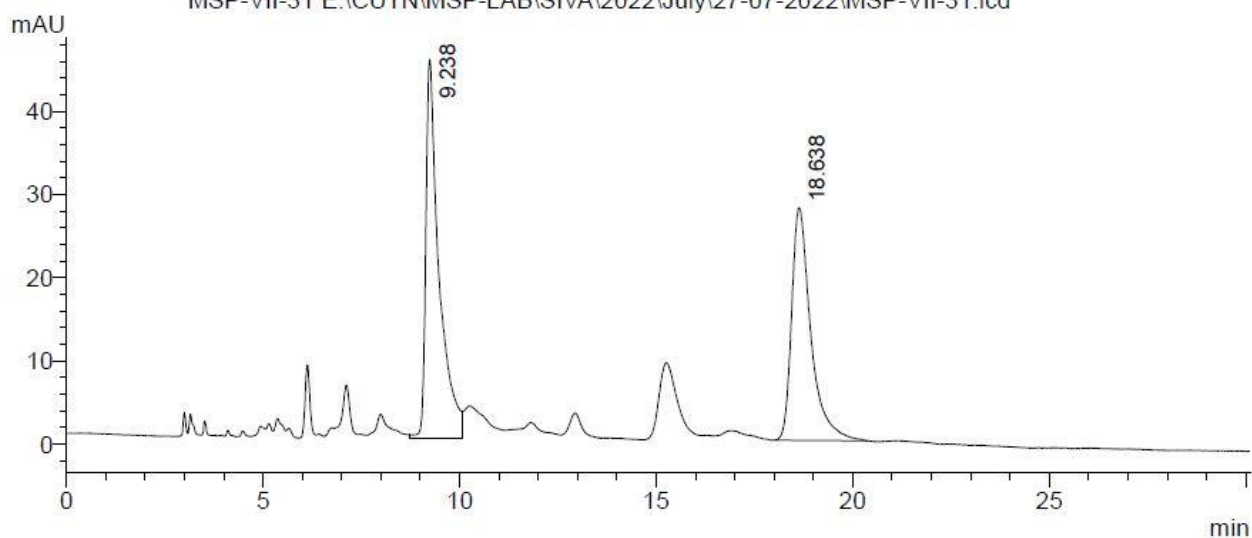

PDA Ch1 254nm

| Peak # | Ret. Time (min) | Area    | Height | Area%   |
|--------|-----------------|---------|--------|---------|
| 1      | 9.238           | 1054400 | 45507  | 52.718  |
| 2      | 18.638          | 945692  | 27976  | 47.282  |
| Total  |                 | 2000092 | 73483  | 100.000 |

### HPLC Data of chiral 4'a: 99% ee

MSP-VII-38 E:\CUTN\MSP-LAB\SIVA\2022\July\27-07-2022\MSP-VII-38.lcd

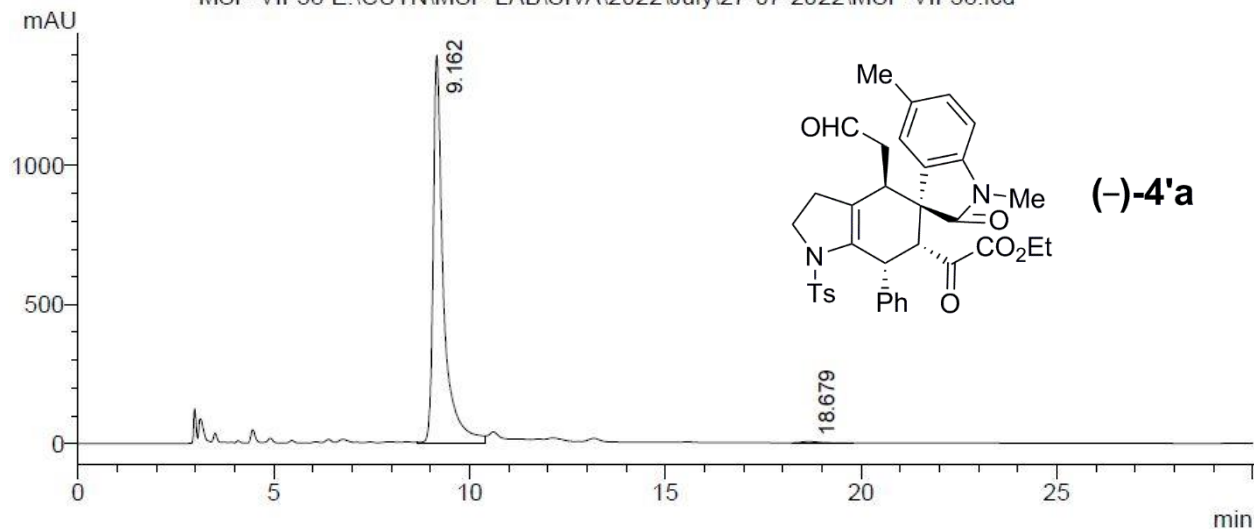

PDA Ch1 254nm

| Peak # | Ret. Time (min) | Area     | Height  | Area%   |
|--------|-----------------|----------|---------|---------|
| 1      | 9.162           | 25754639 | 1396090 | 99.434  |
| 2      | 18.679          | 146603   | 4472    | 0.566   |
| Total  |                 | 25901242 | 1400562 | 100.000 |

### HPLC Data of racemic 4'I

MSP-VII-56 E:\CUTN\MSP-LAB\SIVA\2022\August\13-08-2022\MSP-VII-56.lcd

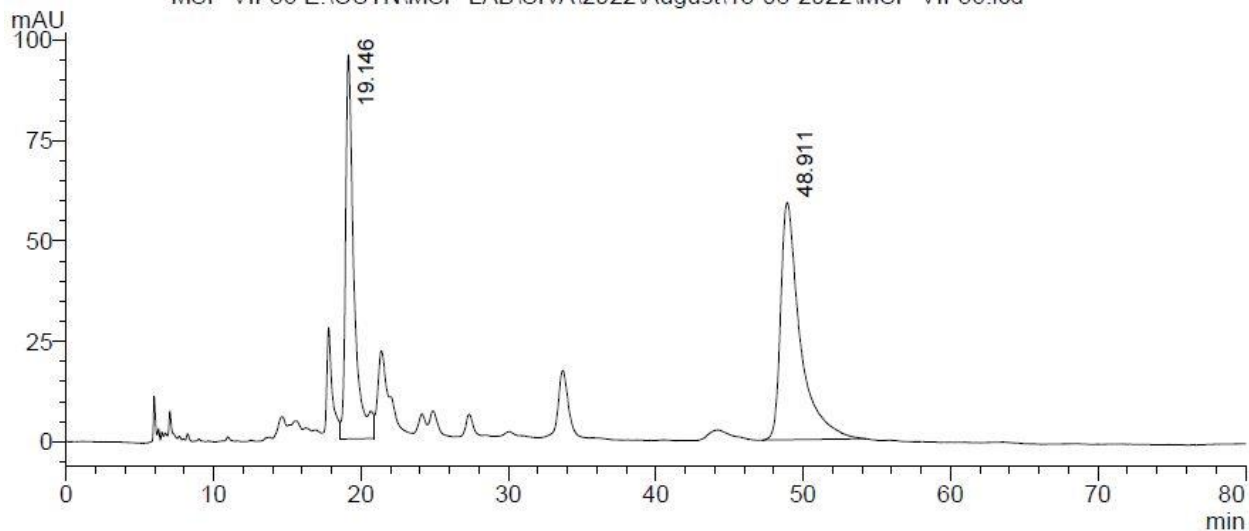

PDA Ch1 254nm

| Peak # | Ret. Time (min) | Area    | Height | Area%   |
|--------|-----------------|---------|--------|---------|
| 1      | 19.146          | 3801121 | 95610  | 41.144  |
| 2      | 48.911          | 5437458 | 59088  | 58.856  |
| Total  |                 | 9238579 | 154698 | 100.000 |

HPLC Data of chiral 4'I: 99% ee

MSP-VII-7 E:\CUTN\MSP-LAB\SIVA\2022\August\13-08-2022\MSP-VII-7.lcd

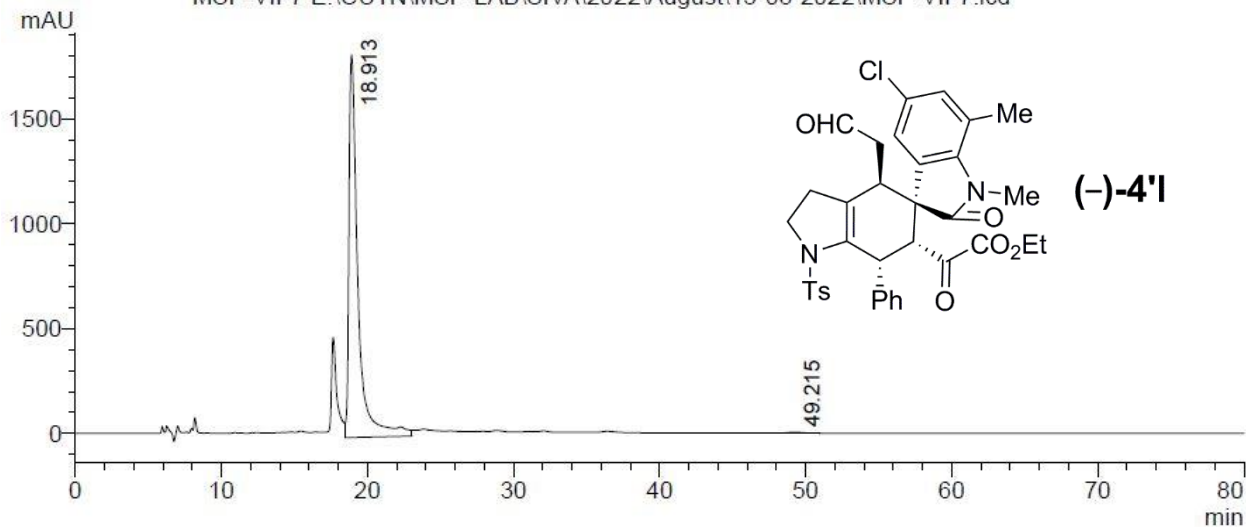

PDA Ch1 254nm

| Peak # | Ret. Time (min) | Area     | Height  | Area%   |
|--------|-----------------|----------|---------|---------|
| 1      | 18.913          | 78367783 | 1822987 | 99.630  |
| 2      | 49.215          | 291270   | 4267    | 0.370   |
| Total  |                 | 78659053 | 1827254 | 100.000 |

### HPLC Data of racemic 4'v

MSP-VI-115 E:\CUTN\MSP-LAB\SIVA\2022\August\02-08-2022\MSP-VI-115.lcd

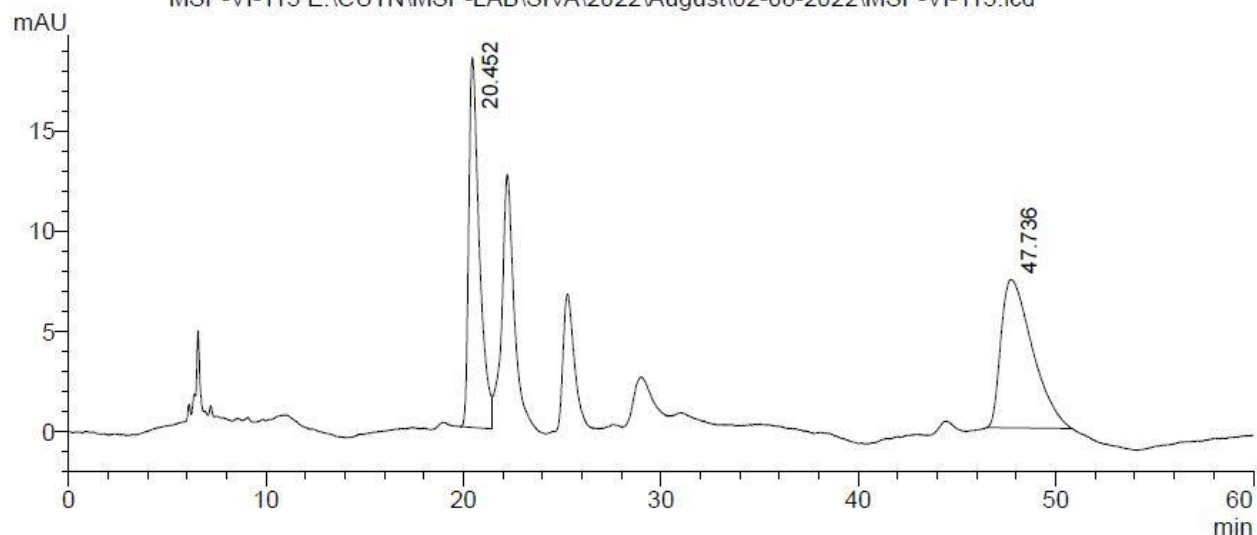

PDA Ch1 254nm

| Peak # | Ret. Time (min) | Area    | Height | Area%   |
|--------|-----------------|---------|--------|---------|
| 1      | 20.452          | 688785  | 18464  | 45.675  |
| 2      | 47.736          | 819221  | 7397   | 54.325  |
| Total  |                 | 1508006 | 25862  | 100.000 |

HPLC Data of chiral 4'v: 99% ee

MSP-VI-129 E:\CUTN\MSP-LAB\SIVA\2022\August\02-08-2022\MSP-VI-129.lcd

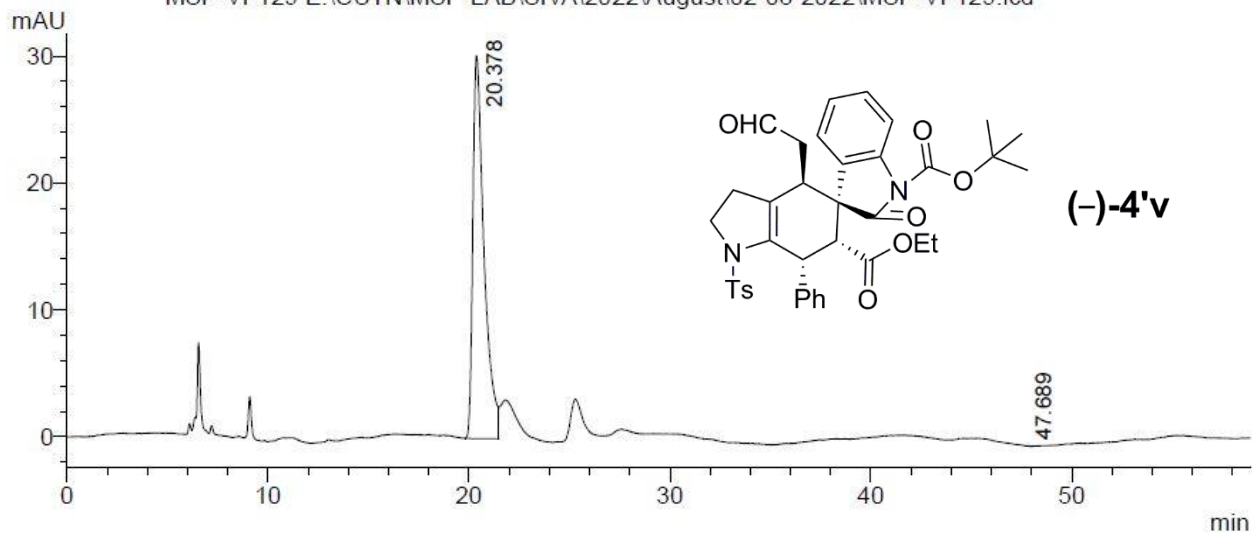

PDA Ch1 254nm

| Peak # | Ret. Time (min) | Area    | Height | Area%   |
|--------|-----------------|---------|--------|---------|
| 1      | 20.378          | 1171578 | 30146  | 99.971  |
| 2      | 47.689          | 337     | 22     | 0.029   |
| Total  |                 | 1171915 | 30169  | 100.000 |
